# Supplementary material for: Capacity Investment in Renewable Energy Technology with Supply Intermittency: Data Granularity Matters!
Source: Atypon-hosted journal article supplement (doi:10.1287/msom.2015.0536), 2015-06-05
Supplement: msom.2015.0536-sm-example2_online.xlsx [file msom.2015.0536-sm-example2_online.xlsx]

## Sheet: Solution
Annual discount factor (d)	0.965
Lifespan of solar thermal units (years)	25
Lifespan of gas heater units (years)	10
Annual degradation of solar panels	0.005
Dispatched annual solar thermal investment cost (a)	36.447
Dispatched annual gas heater investment cost (c)	11.4565
c / (m_p - m_s)	1.37713e-05
F(k2(k1))	0.999986
# of D-S Bins	233
Optimal k1	171.8
Optimal k2 (k1)	208.744	5824
RHS	36.4
LHS	36.4
% Demand met by solar thermal	0.228994
				Solar Thermal Operating Cost (w) ($/kwh)	Expected Gas Price (m_s) ($/kwh)	Expected Penalty (m_p) ($/kwh)
				0	0.0331583	95
						m_L
						0.172887	5825		1			0.00415741				1					1
	Index	Year Index	D-S Index	Water Heating Demand (X) (kwh)	Solar Yield (L)	Solar (L)	Rank	Z(k1)	Prob	Pr(X>Lk1)	Pr(X>Lk1+k2)	LHS		c.d.f.	Rank	Prob		Demand met by PV (kw)	Demand met by Grid (kw)	Unmet Demand (kw)	Prob
	1	1	1	55.303	0	0	1953	55.303	6.77625e-06	1	0	0		0.0582343	1	0.0582343		0	55.303	0	4.56621e-06
	2	1	2	60.634	0	0	2133	60.634	0.00563106	1	0	0		0.0582343	2	0		0	60.634	0	0.00379452
	3	1	3	67.2351	0	0	2340	67.2351	0.00533968	1	0	0		0.0582343	3	0		0	67.2351	0	0.00359817
	4	1	4	69.6784	0.001	0.001	2423	69.5066	6.77625e-06	1	0	2.24689e-10		0.0582343	4	0		0.1718	69.5066	4.60743e-15	4.56621e-06
	5	1	5	76.2057	0	0	2665	76.2057	0.00374049	1	0	0		0.0582343	5	0		0	76.2057	0	0.00252055
	6	1	6	76.8501	0.001	0.001	2702	76.6783	5.421e-05	1	0	1.79751e-09		0.0582343	6	0		0.1718	76.6783	4.60743e-15	3.65297e-05
	7	1	7	84.2604	0	0	2928	84.2604	0.00180926	1	0	0		0.0582343	7	0		0	84.2604	0	0.00121918
	8	1	8	91.784	0	0	3198	91.784	0.000697954	1	0	0		0.0582343	8	0		0	91.784	0	0.00047032
	9	1	9	96.5462	0.247	0.247	1907	54.1116	6.77625e-06	1	0	5.54982e-08		0.0582343	9	0		42.4346	54.1116	0	4.56621e-06
	10	1	10	96.818	0.272	0.272	1798	50.0884	6.77625e-06	1	0	6.11154e-08		0.0582343	10	0		46.7296	50.0884	0	4.56621e-06
	11	1	11	98.8291	0	0	3477	98.8291	2.7105e-05	1	0	0		0.0582343	11	0		0	98.8291	0	1.82648e-05
	12	1	12	104.212	0.036	0.036	3430	98.0267	2.03287e-05	1	0	2.42664e-08		0.0582343	12	0		6.1848	98.0267	-5.32907e-15	1.36986e-05
	13	1	13	102.506	0.08652	0.08652	3048	87.6415	0.000169406	1	0	4.86002e-07		0.0582343	13	0		14.8641	87.6415	-3.55271e-15	0.000114155
	14	1	14	103.171	0.134844	0.134844	2832	80.0049	0.00021684	1	0	9.69533e-07		0.0582343	14	0		23.1662	80.0049	0	0.000146119
	15	1	15	102.046	0.184958	0.184958	2473	70.2701	0.00016263	1	0	9.97394e-07		0.0582343	15	0		31.7758	70.2701	-3.55271e-15	0.000109589
	16	1	16	102.431	0.2419	0.2419	2165	60.873	0.000135525	1	0	1.08705e-06		0.0582343	16	0		41.5584	60.873	0	9.13242e-05
	17	1	17	102.705	0.289714	0.289714	1872	52.9318	9.48675e-05	1	0	9.11339e-07		0.0582343	17	0		49.7729	52.9318	0	6.39269e-05
	18	1	18	101.823	0.336357	0.336357	1643	44.0366	9.48675e-05	1	0	1.05806e-06		0.0582343	18	0		57.7862	44.0366	0	6.39269e-05
	19	1	19	101.584	0.402625	0.402625	1387	32.4135	0.00010842	1	0	1.44745e-06		0.0582343	19	0		69.171	32.4135	0	7.30594e-05
	20	1	20	102.953	0.44596	0.44596	1254	26.3373	0.000169406	1	0	2.50506e-06		0.0582343	20	0		76.6159	26.3373	0	0.000114155
	21	1	21	102.19	0.49195	0.49195	1066	17.6728	0.000135525	1	0	2.21072e-06		0.0582343	21	0		84.517	17.6728	0	9.13242e-05
	22	1	22	102.203	0.552833	0.552833	843	7.2258	8.1315e-05	1	0	1.49059e-06		0.0582343	22	0		94.9768	7.2258	0	5.47945e-05
	23	1	23	103.835	0.617	0.617	1	0	3.38812e-05	0	0	0		0.0582343	23	0		103.835	0	0	2.28311e-05
	24	1	24	102.801	0.6566	0.6566	1	0	3.38812e-05	0	0	0		0.0582343	24	0		102.801	0	0	2.28311e-05
	25	1	25	103.461	0.713667	0.713667	1	0	2.03287e-05	0	0	0		0.0582343	25	0		103.461	0	0	1.36986e-05
	26	1	26	102.228	0.755667	0.755667	1	0	6.09862e-05	0	0	0		0.0582343	26	0		102.228	0	0	4.10959e-05
	27	1	27	102.221	0.813667	0.813667	1	0	2.03287e-05	0	0	0		0.0582343	27	0		102.221	0	0	1.36986e-05
	28	1	28	101.688	0.925	0.925	1	0	6.77625e-06	0	0	0		0.0582343	28	0		101.688	0	0	4.56621e-06
	29	1	29	102.947	0.981	0.981	1	0	1.35525e-05	0	0	0		0.0582343	29	0		102.947	0	0	9.13242e-06
	30	1	30	110.646	0	0	3791	110.646	0.000291379	1	0	0		0.0582343	30	0		0	110.646	0	0.000196347
	31	1	31	109.769	0.0178551	0.0178551	3729	106.701	0.000467561	1	0	2.76817e-07		0.0582343	31	0		3.0675	106.701	6.66134e-15	0.000315068
	32	1	32	109.082	0.0840333	0.0840333	3301	94.6451	0.000406575	1	0	1.13288e-06		0.0582343	32	0		14.4369	94.6451	-5.32907e-15	0.000273973
	33	1	33	109.423	0.128574	0.128574	3035	87.3339	0.000365917	1	0	1.56002e-06		0.0582343	33	0		22.089	87.3339	0	0.000246575
	34	1	34	108.741	0.183067	0.183067	2742	77.2904	0.000304931	1	0	1.85099e-06		0.0582343	34	0		31.4509	77.2904	0	0.000205479
	35	1	35	108.805	0.237548	0.237548	2381	67.9938	0.000210064	1	0	1.65461e-06		0.0582343	35	0		40.8108	67.9938	7.10543e-15	0.000141553
	36	1	36	109.298	0.295351	0.295351	2081	58.5568	0.000250721	1	0	2.4554e-06		0.0582343	36	0		50.7414	58.5568	0	0.00016895
	37	1	37	109.847	0.342787	0.342787	1820	50.956	0.000318484	1	0	3.61996e-06		0.0582343	37	0		58.8908	50.956	0	0.000214612
	38	1	38	109.33	0.399018	0.399018	1573	40.7786	0.00037947	1	0	5.02068e-06		0.0582343	38	0		68.5513	40.7786	0	0.000255708
	39	1	39	110.062	0.45425	0.45425	1376	32.0219	0.000406575	1	0	6.1239e-06		0.0582343	39	0		78.0401	32.0219	0	0.000273973
	40	1	40	109.772	0.49622	0.49622	1213	24.522	0.000277826	1	0	4.5713e-06		0.0582343	40	0		85.2505	24.522	0	0.000187215
	41	1	41	110.381	0.552314	0.552314	1008	15.4934	0.000237169	1	0	4.34346e-06		0.0582343	41	0		94.8876	15.4934	0	0.000159817
	42	1	42	109.353	0.608087	0.608087	796	4.88384	0.000155854	1	0	3.1425e-06		0.0582343	42	0		104.469	4.88384	0	0.000105023
	43	1	43	110.156	0.6545	0.6545	1	0	0.000149077	0	0	0		0.0582343	43	0		110.156	0	0	0.000100457
	44	1	44	109.447	0.717048	0.717048	1	0	0.000142301	0	0	0		0.0582343	44	0		109.447	0	0	9.58904e-05
	45	1	45	110.025	0.768773	0.768773	1	0	0.000149077	0	0	0		0.0582343	45	0		110.025	0	0	0.000100457
	46	1	46	110.547	0.819667	0.819667	1	0	0.000182959	0	0	0		0.0582343	46	0		110.547	0	0	0.000123288
	47	1	47	110.378	0.87832	0.87832	1	0	0.000169406	0	0	0		0.0582343	47	0		110.378	0	0	0.000114155
	48	1	48	110.244	0.922417	0.922417	1	0	8.1315e-05	0	0	0		0.0582343	48	0		110.244	0	0	5.47945e-05
	49	1	49	110.88	0.980643	0.980643	1	0	9.48675e-05	0	0	0		0.0582343	49	0		110.88	0	0	6.39269e-05
	50	1	50	118.816	0	0	4070	118.816	0.00027105	1	0	0		0.0582343	50	0		0	118.816	0	0.000182648
	51	1	51	117.125	0.0209362	0.0209362	3931	113.528	0.000318484	1	0	2.21094e-07		0.0582343	51	0		3.59683	113.528	4.88498e-15	0.000214612
	52	1	52	116.764	0.090375	0.090375	3545	101.237	0.00010842	1	0	3.249e-07		0.0582343	52	0		15.5264	101.237	3.55271e-15	7.30594e-05
	53	1	53	116.425	0.135152	0.135152	3248	93.2056	0.000223616	1	0	1.00211e-06		0.0582343	53	0		23.219	93.2056	3.55271e-15	0.000150685
	54	1	54	116.405	0.183828	0.183828	2960	84.8233	0.000196511	1	0	1.19782e-06		0.0582343	54	0		31.5816	84.8233	3.55271e-15	0.00013242
	55	1	55	117.346	0.240125	0.240125	2659	76.0921	0.00016263	1	0	1.29488e-06		0.0582343	55	0		41.2535	76.0921	-7.10543e-15	0.000109589
	56	1	56	117.873	0.2916	0.2916	2375	67.7757	0.00027105	1	0	2.62077e-06		0.0582343	56	0		50.0969	67.7757	0	0.000182648
	57	1	57	117.516	0.343423	0.343423	2078	58.5156	0.000352365	1	0	4.0125e-06		0.0582343	57	0		59.0001	58.5156	0	0.000237443
	58	1	58	116.704	0.39795	0.39795	1745	48.336	0.00027105	1	0	3.5766e-06		0.0582343	58	0		68.3678	48.336	0	0.000182648
	59	1	59	117.607	0.453684	0.453684	1541	39.6645	0.000257497	1	0	3.87364e-06		0.0582343	59	0		77.9429	39.6645	0	0.000173516
	60	1	60	117.292	0.499838	0.499838	1359	31.4203	0.000250721	1	0	4.1554e-06		0.0582343	60	0		85.8721	31.4203	0	0.00016895
	61	1	61	117.694	0.55325	0.55325	1167	22.6458	0.00021684	1	0	3.97789e-06		0.0582343	61	0		95.0483	22.6458	0	0.000146119
	62	1	62	118.274	0.60769	0.60769	971	13.8729	0.000284602	1	0	5.73474e-06		0.0582343	62	0		104.401	13.8729	0	0.000191781
	63	1	63	118.248	0.66025	0.66025	793	4.81742	0.000189735	1	0	4.15383e-06		0.0582343	63	0		113.431	4.81742	0	0.000127854
	64	1	64	117.696	0.715436	0.715436	1	0	0.000264274	0	0	0		0.0582343	64	0		117.696	0	0	0.000178082
	65	1	65	116.683	0.76525	0.76525	1	0	0.00021684	0	0	0		0.0582343	65	0		116.683	0	0	0.000146119
	66	1	66	118.418	0.820378	0.820378	1	0	0.000304931	0	0	0		0.0582343	66	0		118.418	0	0	0.000205479
	67	1	67	117.778	0.874857	0.874857	1	0	0.000189735	0	0	0		0.0582343	67	0		117.778	0	0	0.000127854
	68	1	68	118.151	0.928135	0.928135	1	0	0.000250721	0	0	0		0.0582343	68	0		118.151	0	0	0.00016895
	69	1	69	117.277	0.980464	0.980464	1	0	0.000189735	0	0	0		0.0582343	69	0		117.277	0	0	0.000127854
	70	1	70	126.34	0	0	4254	126.34	0.000643744	1	0	0		0.0582343	70	0		0	126.34	0	0.00043379
	71	1	71	124.182	0.0251429	0.0251429	4117	119.863	9.48675e-05	1	0	7.90905e-08		0.0582343	71	0		4.31954	119.863	4.44089e-15	6.39269e-05
	72	1	72	125.135	0.0906667	0.0906667	3763	109.559	2.03287e-05	1	0	6.11154e-08		0.0582343	72	0		15.5765	109.559	-5.32907e-15	1.36986e-05
	73	1	73	125.637	0.130727	0.130727	3615	103.178	7.45387e-05	1	0	3.23103e-07		0.0582343	73	0		22.4589	103.178	3.55271e-15	5.02283e-05
	74	1	74	125.396	0.185417	0.185417	3258	93.5418	0.00016263	1	0	9.99866e-07		0.0582343	74	0		31.8546	93.5418	0	0.000109589
	75	1	75	126.125	0.23928	0.23928	2966	85.0171	0.000169406	1	0	1.34409e-06		0.0582343	75	0		41.1083	85.0171	0	0.000114155
	76	1	76	124.62	0.293667	0.293667	2618	74.1677	0.000243945	1	0	2.37541e-06		0.0582343	76	0		50.4519	74.1677	0	0.000164384
	77	1	77	126.205	0.342775	0.342775	2366	67.3159	0.00027105	1	0	3.08071e-06		0.0582343	77	0		58.8887	67.3159	0	0.000182648
	78	1	78	125.744	0.39875	0.39875	2042	57.2383	0.00021684	1	0	2.86703e-06		0.0582343	78	0		68.5053	57.2383	0	0.000146119
	79	1	79	125.514	0.450077	0.450077	1740	48.1907	0.000176182	1	0	2.62931e-06		0.0582343	79	0		77.3232	48.1907	0	0.000118721
	80	1	80	126.28	0.50075	0.50075	1559	40.2511	0.000243945	1	0	4.05047e-06		0.0582343	80	0		86.0289	40.2511	0	0.000164384
	81	1	81	126.137	0.553447	0.553447	1352	31.0551	0.000257497	1	0	4.72543e-06		0.0582343	81	0		95.0823	31.0551	0	0.000173516
	82	1	82	125.777	0.610903	0.610903	1124	20.8238	0.000210064	1	0	4.25516e-06		0.0582343	82	0		104.953	20.8238	0	0.000141553
	83	1	83	125.425	0.659683	0.659683	937	12.0915	0.000277826	1	0	6.07716e-06		0.0582343	83	0		113.334	12.0915	0	0.000187215
	84	1	84	126.231	0.710953	0.710953	781	4.08916	0.000291379	1	0	6.86897e-06		0.0582343	84	0		122.142	4.08916	0	0.000196347
	85	1	85	125.541	0.768714	0.768714	1	0	0.000189735	0	0	0		0.0582343	85	0		125.541	0	0	0.000127854
	86	1	86	125.729	0.816913	0.816913	1	0	0.000155854	0	0	0		0.0582343	86	0		125.729	0	0	0.000105023
	87	1	87	126.192	0.871	0.871	1	0	0.000121972	0	0	0		0.0582343	87	0		126.192	0	0	8.21918e-05
	88	1	88	125.103	0.926333	0.926333	1	0	0.000203287	0	0	0		0.0582343	88	0		125.103	0	0	0.000136986
	89	1	89	125.75	0.9791	0.9791	1	0	0.000135525	0	0	0		0.0582343	89	0		125.75	0	0	9.13242e-05
	90	1	90	134.327	0	0	4479	134.327	0.00121972	1	0	0		0.0582343	90	0		0	134.327	0	0.000821918
	91	1	91	136.75	0.0153438	0.0153438	4458	134.114	0.00021684	1	0	1.10322e-07		0.0582343	91	0		2.63606	134.114	-4.88498e-15	0.000146119
	92	1	92	136.469	0.0724118	0.0724118	4226	124.029	0.000115196	1	0	2.76592e-07		0.0582343	92	0		12.4403	124.029	-7.10543e-15	7.76256e-05
	93	1	93	134.546	0.135733	0.135733	3841	111.227	0.000101644	1	0	4.57467e-07		0.0582343	93	0		23.319	111.227	3.55271e-15	6.84932e-05
	94	1	94	135.385	0.189214	0.189214	3605	102.878	9.48675e-05	1	0	5.95201e-07		0.0582343	94	0		32.507	102.878	0	6.39269e-05
	95	1	95	134.573	0.25	0.25	3195	91.6227	0.000101644	1	0	8.42584e-07		0.0582343	95	0		42.95	91.6227	-7.10543e-15	6.84932e-05
	96	1	96	134.833	0.29132	0.29132	2959	84.7842	0.000169406	1	0	1.63641e-06		0.0582343	96	0		50.0488	84.7842	-7.10543e-15	0.000114155
	97	1	97	134.181	0.345154	0.345154	2633	74.8832	0.000176182	1	0	2.01636e-06		0.0582343	97	0		59.2974	74.8832	0	0.000118721
	98	1	98	135.806	0.404889	0.404889	2322	66.2459	0.000121972	1	0	1.63753e-06		0.0582343	98	0		69.5599	66.2459	0	8.21918e-05
	99	1	99	134.166	0.447375	0.447375	2045	57.3067	0.00010842	1	0	1.60832e-06		0.0582343	99	0		76.859	57.3067	0	7.30594e-05
	100	1	100	134.177	0.505611	0.505611	1716	47.3132	0.000121972	1	0	2.04489e-06		0.0582343	100	0		86.864	47.3132	0	8.21918e-05
	101	1	101	134.205	0.555056	0.555056	1523	38.8469	0.000121972	1	0	2.24487e-06		0.0582343	101	0		95.3585	38.8469	0	8.21918e-05
	102	1	102	134.126	0.606406	0.606406	1327	29.9455	0.00021684	1	0	4.36009e-06		0.0582343	102	0		104.181	29.9455	0	0.000146119
	103	1	103	133.839	0.657083	0.657083	1127	20.9519	0.00016263	1	0	3.54335e-06		0.0582343	103	0		112.887	20.9519	0	0.000109589
	104	1	104	132.593	0.706895	0.706895	921	11.1487	0.000128749	1	0	3.0178e-06		0.0582343	104	0		121.445	11.1487	0	8.6758e-05
	105	1	105	134.937	0.769944	0.769944	759	2.66033	0.000121972	1	0	3.11396e-06		0.0582343	105	0		132.276	2.66033	0	8.21918e-05
	106	1	106	134.452	0.825083	0.825083	1	0	0.00016263	0	0	0		0.0582343	106	0		134.452	0	0	0.000109589
	107	1	107	133.689	0.8768	0.8768	1	0	6.77625e-05	0	0	0		0.0582343	107	0		133.689	0	0	4.56621e-05
	108	1	108	134.382	0.930111	0.930111	1	0	0.000121972	0	0	0		0.0582343	108	0		134.382	0	0	8.21918e-05
	109	1	109	134.432	0.9891	0.9891	1	0	6.77625e-05	0	0	0		0.0582343	109	0		134.432	0	0	4.56621e-05
	110	1	110	142.322	0	0	4723	142.322	0.00131459	1	0	0		0.0582343	110	0		0	142.322	0	0.000885845
	111	1	111	142.163	0.0132235	0.0132235	4685	139.891	0.00115196	1	0	5.05101e-07		0.0582343	111	0		2.2718	139.891	-7.54952e-15	0.000776256
	112	1	112	142.825	0.0753415	0.0753415	4354	129.881	0.000277826	1	0	6.94064e-07		0.0582343	112	0		12.9437	129.881	1.24345e-14	0.000187215
	113	1	113	143.775	0.133	0.133	4167	120.926	0.000243945	1	0	1.07581e-06		0.0582343	113	0		22.8494	120.926	3.55271e-15	0.000164384
	114	1	114	142.756	0.18681	0.18681	3816	110.662	0.000142301	1	0	8.81455e-07		0.0582343	114	0		32.0939	110.662	0	9.58904e-05
	115	1	115	142.655	0.238765	0.238765	3558	101.635	0.000115196	1	0	9.12013e-07		0.0582343	115	0		41.0198	101.635	0	7.76256e-05
	116	1	116	142.988	0.290258	0.290258	3245	93.1221	0.000210064	1	0	2.02175e-06		0.0582343	116	0		49.8663	93.1221	0	0.000141553
	117	1	117	142.957	0.339292	0.339292	2957	84.6671	0.00016263	1	0	1.82964e-06		0.0582343	117	0		58.2903	84.6671	0	0.000109589
	118	1	118	143.236	0.395444	0.395444	2642	75.2987	0.000182959	1	0	2.399e-06		0.0582343	118	0		67.9374	75.2987	0	0.000123288
	119	1	119	143.03	0.447333	0.447333	2320	66.1779	0.000182959	1	0	2.71379e-06		0.0582343	119	0		76.8519	66.1779	0	0.000123288
	120	1	120	142.977	0.501176	0.501176	2030	56.8747	0.000115196	1	0	1.91435e-06		0.0582343	120	0		86.1021	56.8747	0	7.76256e-05
	121	1	121	141.839	0.557545	0.557545	1685	46.0525	7.45387e-05	1	0	1.37802e-06		0.0582343	121	0		95.7863	46.0525	0	5.02283e-05
	122	1	122	143.27	0.60575	0.60575	1530	39.2017	0.00010842	1	0	2.17769e-06		0.0582343	122	0		104.068	39.2017	0	7.30594e-05
	123	1	123	142.824	0.655647	0.655647	1331	30.1835	0.000115196	1	0	2.50438e-06		0.0582343	123	0		112.64	30.1835	0	7.76256e-05
	124	1	124	139.822	0.714889	0.714889	1047	17.0037	6.09862e-05	1	0	1.44565e-06		0.0582343	124	0		122.818	17.0037	0	4.10959e-05
	125	1	125	141.678	0.7718	0.7718	884	9.08314	3.38812e-05	1	0	8.67075e-07		0.0582343	125	0		132.595	9.08314	0	2.28311e-05
	126	1	126	142.728	0.8206	0.8206	743	1.74926	6.77625e-05	1	0	1.8438e-06		0.0582343	126	0		140.979	1.74926	0	4.56621e-05
	127	1	127	141.412	0.8685	0.8685	1	0	4.06575e-05	0	0	0		0.0582343	127	0		141.412	0	0	2.73973e-05
	128	1	128	143.456	0.938286	0.938286	1	0	4.74337e-05	0	0	0		0.0582343	128	0		143.456	0	0	3.19635e-05
	129	1	129	143.297	0.994	0.994	1	0	3.38812e-05	0	0	0		0.0582343	129	0		143.297	0	0	2.28311e-05
	130	1	130	149.521	0	0	4907	149.521	0.000413351	1	0	0		0.0582343	130	0		0	149.521	0	0.000278539
	131	1	131	149.742	0.0256486	0.0256486	4783	145.336	0.000250721	1	0	2.1323e-07		0.0582343	131	0		4.40644	145.336	2.66454e-15	0.00016895
	132	1	132	150.706	0.0837358	0.0837358	4567	136.32	0.000359141	1	0	9.9717e-07		0.0582343	132	0		14.3858	136.32	1.06581e-14	0.000242009
	133	1	133	150.566	0.13393	0.13393	4289	127.557	0.000386246	1	0	1.71528e-06		0.0582343	133	0		23.0091	127.557	0	0.000260274
	134	1	134	150.954	0.1874	0.1874	4069	118.759	0.000304931	1	0	1.8948e-06		0.0582343	134	0		32.1953	118.759	7.10543e-15	0.000205479
	135	1	135	151.609	0.2375	0.2375	3821	110.806	0.00021684	1	0	1.70764e-06		0.0582343	135	0		40.8025	110.806	7.10543e-15	0.000146119
	136	1	136	150.593	0.2935	0.2935	3526	100.169	0.000189735	1	0	1.84649e-06		0.0582343	136	0		50.4233	100.169	0	0.000127854
	137	1	137	151.352	0.342488	0.342488	3234	92.513	0.000291379	1	0	3.30899e-06		0.0582343	137	0		58.8395	92.513	7.10543e-15	0.000196347
	138	1	138	150.26	0.396147	0.396147	2897	82.2022	0.000230392	1	0	3.02634e-06		0.0582343	138	0		68.0581	82.2022	0	0.000155251
	139	1	139	150.624	0.451	0.451	2580	73.1422	0.000237169	1	0	3.54672e-06		0.0582343	139	0		77.4818	73.1422	0	0.000159817
	140	1	140	150.324	0.50384	0.50384	2251	63.7643	0.000169406	1	0	2.83018e-06		0.0582343	140	0		86.5597	63.7643	0	0.000114155
	141	1	141	149.989	0.551333	0.551333	1952	55.2704	4.06575e-05	1	0	7.43271e-07		0.0582343	141	0		94.7191	55.2704	0	2.73973e-05
	142	1	142	150.834	0.611308	0.611308	1681	45.8112	8.80912e-05	1	0	1.7856e-06		0.0582343	142	0		105.023	45.8112	0	5.93607e-05
	143	1	143	150.73	0.646333	0.646333	1543	39.6899	4.06575e-05	1	0	8.71344e-07		0.0582343	143	0		111.04	39.6899	0	2.73973e-05
	144	1	144	151.634	0.709667	0.709667	1320	29.7132	2.03287e-05	1	0	4.78363e-07		0.0582343	144	0		121.921	29.7132	0	1.36986e-05
	145	1	145	147.687	0.773	0.773	992	14.8856	6.77625e-06	1	0	1.73685e-07		0.0582343	145	0		132.801	14.8856	0	4.56621e-06
	146	1	146	151.495	0.819	0.819	914	10.791	3.38812e-05	1	0	9.20101e-07		0.0582343	146	0		140.704	10.791	0	2.28311e-05
	147	1	147	149.936	0.87275	0.87275	1	0	2.7105e-05	0	0	0		0.0582343	147	0		149.936	0	0	1.82648e-05
	148	1	148	150.126	0.969	0.969	1	0	1.35525e-05	0	0	0		0.0582343	148	0		150.126	0	0	9.13242e-06
	149	1	149	160.217	0	0	5137	160.217	0.000365917	1	0	0		0.0582343	149	0		0	160.217	0	0.000246575
	150	1	150	159.223	0.023	0.023	5011	155.272	4.74337e-05	1	0	3.61749e-08		0.0582343	150	0		3.9514	155.272	6.66134e-15	3.19635e-05
	151	1	151	159.405	0.0758214	0.0758214	4827	146.379	0.000189735	1	0	4.77015e-07		0.0582343	151	0		13.0261	146.379	-5.32907e-15	0.000127854
	152	1	152	159.512	0.129875	0.129875	4602	137.199	0.00016263	1	0	7.00356e-07		0.0582343	152	0		22.3125	137.199	-1.06581e-14	0.000109589
	153	1	153	159.325	0.183613	0.183613	4294	127.78	0.000210064	1	0	1.27893e-06		0.0582343	153	0		31.5447	127.78	3.55271e-15	0.000141553
	154	1	154	158.13	0.239889	0.239889	4032	116.917	0.000243945	1	0	1.94041e-06		0.0582343	154	0		41.2129	116.917	-7.10543e-15	0.000164384
	155	1	155	159.159	0.290781	0.290781	3760	109.203	0.00021684	1	0	2.09073e-06		0.0582343	155	0		49.9562	109.203	-7.10543e-15	0.000146119
	156	1	156	157.824	0.346273	0.346273	3448	98.3347	0.000149077	1	0	1.71168e-06		0.0582343	156	0		59.4897	98.3347	0	0.000100457
	157	1	157	157.778	0.401632	0.401632	3110	88.7773	0.000128749	1	0	1.7146e-06		0.0582343	157	0		69.0003	88.7773	0	8.6758e-05
	158	1	158	157.376	0.4458	0.4458	2860	80.7875	0.000135525	1	0	2.00333e-06		0.0582343	158	0		76.5884	80.7875	0	9.13242e-05
	159	1	159	158.516	0.499	0.499	2569	72.7883	6.77625e-05	1	0	1.1212e-06		0.0582343	159	0		85.7282	72.7883	0	4.56621e-05
	160	1	160	159.935	0.563333	0.563333	2231	63.1541	2.03287e-05	1	0	3.79724e-07		0.0582343	160	0		96.7807	63.1541	0	1.36986e-05
	161	1	161	158.375	0.612	0.612	1880	53.2333	2.03287e-05	1	0	4.12529e-07		0.0582343	161	0		105.142	53.2333	0	1.36986e-05
	162	1	162	161.812	0.6575	0.6575	1761	48.8531	1.35525e-05	1	0	2.95466e-07		0.0582343	162	0		112.959	48.8531	0	9.13242e-06
	163	1	163	162.289	0.708	0.708	1568	40.6544	6.77625e-06	1	0	1.5908e-07		0.0582343	163	0		121.634	40.6544	0	4.56621e-06
	164	1	164	157.881	0.7685	0.7685	1245	25.8523	1.35525e-05	1	0	3.45347e-07		0.0582343	164	0		132.028	25.8523	0	9.13242e-06
	165	1	165	159.099	0.8245	0.8245	1057	17.4503	1.35525e-05	1	0	3.70512e-07		0.0582343	165	0		141.649	17.4503	0	9.13242e-06
	166	1	166	167.701	0	0	5312	167.701	0.000691177	1	0	0		0.0582343	166	0		0	167.701	0	0.000465753
	167	1	167	168.938	0.0155641	0.0155641	5277	166.264	0.000264274	1	0	1.36386e-07		0.0582343	167	0		2.67391	166.264	-9.32587e-15	0.000178082
	168	1	168	168.498	0.07675	0.07675	5015	155.312	0.00021684	1	0	5.51836e-07		0.0582343	168	0		13.1857	155.312	7.10543e-15	0.000146119
	169	1	169	167.979	0.129333	0.129333	4809	145.759	0.000182959	1	0	7.84614e-07		0.0582343	169	0		22.2195	145.759	1.06581e-14	0.000123288
	170	1	170	166.873	0.185706	0.185706	4524	134.969	0.000230392	1	0	1.41869e-06		0.0582343	170	0		31.9043	134.969	1.06581e-14	0.000155251
	171	1	171	167.446	0.235059	0.235059	4283	127.062	0.000115196	1	0	8.97857e-07		0.0582343	171	0		40.3831	127.062	-7.10543e-15	7.76256e-05
	172	1	172	167.294	0.290167	0.290167	4042	117.444	0.00016263	1	0	1.56473e-06		0.0582343	172	0		49.8506	117.444	-7.10543e-15	0.000109589
	173	1	173	168.018	0.337545	0.337545	3775	110.028	7.45387e-05	1	0	8.3427e-07		0.0582343	173	0		57.9903	110.028	7.10543e-15	5.02283e-05
	174	1	174	165.211	0.390857	0.390857	3433	98.0622	4.74337e-05	1	0	6.14749e-07		0.0582343	174	0		67.1493	98.0622	0	3.19635e-05
	175	1	175	169.271	0.438	0.438	3276	94.0225	1.35525e-05	1	0	1.96828e-07		0.0582343	175	0		75.2484	94.0225	0	9.13242e-06
	176	1	176	168.095	0.502333	0.502333	2889	81.794	6.09862e-05	1	0	1.01582e-06		0.0582343	176	0		86.3009	81.794	0	4.10959e-05
	177	1	177	167.408	0.572	0.572	2412	69.1379	3.38812e-05	1	0	6.42611e-07		0.0582343	177	0		98.2696	69.1379	0	2.28311e-05
	178	1	178	168.09	0.616	0.616	2205	62.261	1.35525e-05	1	0	2.76817e-07		0.0582343	178	0		105.829	62.261	0	9.13242e-06
	179	1	179	164.989	0.642	0.642	1929	54.6931	6.77625e-06	1	0	1.4425e-07		0.0582343	179	0		110.296	54.6931	0	4.56621e-06
	180	1	180	175.732	0	0	5451	175.732	0.00121295	1	0	0		0.0582343	180	0		0	175.732	0	0.000817352
	181	1	181	175.992	0.0167	0.0167	5417	173.123	0.000948675	1	0	5.25323e-07		0.0582343	181	0		2.86906	173.123	-6.21725e-15	0.000639269
	182	1	182	175.755	0.0768308	0.0768308	5181	162.555	0.000440456	1	0	1.1221e-06		0.0582343	182	0		13.1995	162.555	1.06581e-14	0.000296804
	183	1	183	177.01	0.1275	0.1275	5006	155.105	0.00016263	1	0	6.87548e-07		0.0582343	183	0		21.9045	155.105	1.42109e-14	0.000109589
	184	1	184	175.128	0.188833	0.188833	4750	142.687	0.000121972	1	0	7.63718e-07		0.0582343	184	0		32.4416	142.687	1.42109e-14	8.21918e-05
	185	1	185	176.078	0.243684	0.243684	4466	134.213	0.000128749	1	0	1.04031e-06		0.0582343	185	0		41.8649	134.213	7.10543e-15	8.6758e-05
	186	1	186	175.807	0.292143	0.292143	4251	125.617	9.48675e-05	1	0	9.18978e-07		0.0582343	186	0		50.1901	125.617	0	6.39269e-05
	187	1	187	175.31	0.3449	0.3449	4019	116.057	6.77625e-05	1	0	7.74952e-07		0.0582343	187	0		59.2538	116.057	0	4.56621e-05
	188	1	188	176.994	0.384333	0.384333	3828	110.966	4.06575e-05	1	0	5.18133e-07		0.0582343	188	0		66.0285	110.966	0	2.73973e-05
	189	1	189	175.086	0.452	0.452	3418	97.4328	1.35525e-05	1	0	2.03119e-07		0.0582343	189	0		77.6536	97.4328	0	9.13242e-06
	190	1	190	175.616	0.5008	0.5008	3152	89.5786	3.38812e-05	1	0	5.62621e-07		0.0582343	190	0		86.0374	89.5786	0	2.28311e-05
	191	1	191	177.425	0.5524	0.5524	2905	82.5222	3.38812e-05	1	0	6.20591e-07		0.0582343	191	0		94.9023	82.5222	0	2.28311e-05
	192	1	192	174.325	0.612667	0.612667	2411	69.0691	2.03287e-05	1	0	4.12978e-07		0.0582343	192	0		105.256	69.0691	0	1.36986e-05
	193	1	193	174.32	0.638	0.638	2285	64.7118	6.77625e-06	1	0	1.43352e-07		0.0582343	193	0		109.608	64.7118	0	4.56621e-06
	194	1	194	184.763	0	0	5598	184.763	0.00180248	1	0	0		0.0582343	194	0		0	184.763	0	0.00121461
	195	1	195	183.108	0.0169167	0.0169167	5526	180.201	0.00065052	1	0	3.64895e-07		0.0582343	195	0		2.90628	180.201	2.66454e-15	0.000438356
	196	1	196	184.325	0.0775345	0.0775345	5360	171.005	0.000393022	1	0	1.01043e-06		0.0582343	196	0		13.3204	171.005	0	0.00026484
	197	1	197	184.26	0.1245	0.1245	5189	162.871	0.000230392	1	0	9.51109e-07		0.0582343	197	0		21.3891	162.871	1.06581e-14	0.000155251
	198	1	198	184.898	0.183	0.183	4975	153.458	0.000142301	1	0	8.6348e-07		0.0582343	198	0		31.4394	153.458	3.55271e-15	9.58904e-05
	199	1	199	183.541	0.238889	0.238889	4748	142.5	0.000121972	1	0	9.66163e-07		0.0582343	199	0		41.0411	142.5	7.10543e-15	8.21918e-05
	200	1	200	183.235	0.2935	0.2935	4437	132.812	2.7105e-05	1	0	2.63785e-07		0.0582343	200	0		50.4233	132.812	-1.42109e-14	1.82648e-05
	201	1	201	184.653	0.318	0.318	4361	130.02	6.77625e-06	1	0	7.14511e-08		0.0582343	201	0		54.6324	130.02	1.42109e-14	4.56621e-06
	202	1	202	180.366	0.411	0.411	3768	109.756	6.77625e-06	1	0	9.23472e-08		0.0582343	202	0		70.6098	109.756	0	4.56621e-06
	203	1	203	182.571	0.446667	0.446667	3714	105.834	2.03287e-05	1	0	3.01083e-07		0.0582343	203	0		76.7373	105.834	0	1.36986e-05
	204	1	204	183.114	0.505667	0.505667	3383	96.2402	2.03287e-05	1	0	3.40853e-07		0.0582343	204	0		86.8735	96.2402	0	1.36986e-05
	205	1	205	183.726	0.56	0.56	3043	87.518	6.77625e-06	1	0	1.25826e-07		0.0582343	205	0		96.208	87.518	0	4.56621e-06
	206	1	206	192.03	0	0	5661	192.03	0.00158564	1	0	0		0.0582343	206	0		0	192.03	0	0.00106849
	207	1	207	193.951	0.00839583	0.00839583	5693	192.508	0.00032526	1	0	9.05497e-08		0.0582343	207	0		1.4424	192.508	9.32587e-15	0.000219178
	208	1	208	193.238	0.0707333	0.0707333	5551	181.086	0.000101644	1	0	2.38395e-07		0.0582343	208	0		12.152	181.086	-1.06581e-14	6.84932e-05
	209	1	209	193.857	0.132	0.132	5364	171.18	8.1315e-05	1	0	3.55907e-07		0.0582343	209	0		22.6776	171.18	1.06581e-14	5.47945e-05
	210	1	210	194.57	0.183667	0.183667	5196	163.016	4.06575e-05	1	0	2.47607e-07		0.0582343	210	0		31.5539	163.016	0	2.73973e-05
	211	1	211	192.258	0.226	0.226	4974	153.431	1.35525e-05	1	0	1.01559e-07		0.0582343	211	0		38.8268	153.431	-7.10543e-15	9.13242e-06
	212	1	212	192.907	0.27	0.27	4832	146.521	6.77625e-06	1	0	6.0666e-08		0.0582343	212	0		46.386	146.521	-7.10543e-15	4.56621e-06
	213	1	213	190.791	0.456	0.456	3887	112.45	6.77625e-06	1	0	1.02458e-07		0.0582343	213	0		78.3408	112.45	0	4.56621e-06
	214	1	214	200.029	0	0	5751	200.029	0.000725059	1	0	0		0.0582343	214	0		0	200.029	0	0.000488584
	215	1	215	199.731	0.0035	0.0035	5726	199.13	0.000311707	1	0	3.61749e-08		0.0582343	215	0		0.6013	199.13	8.65974e-15	0.000210046
	216	1	216	201.421	0.0872222	0.0872222	5626	186.436	6.09862e-05	1	0	1.76381e-07		0.0582343	216	0		14.9848	186.436	-1.24345e-14	4.10959e-05
	217	1	217	200.136	0.1361	0.1361	5481	176.754	6.77625e-05	1	0	3.05802e-07		0.0582343	217	0		23.382	176.754	-3.55271e-15	4.56621e-05
	218	1	218	201.582	0.185364	0.185364	5347	169.737	7.45387e-05	1	0	4.58141e-07		0.0582343	218	0		31.8455	169.737	-3.55271e-15	5.02283e-05
	219	1	219	201.223	0.234	0.234	5166	161.022	2.7105e-05	1	0	2.10309e-07		0.0582343	219	0		40.2012	161.022	0	1.82648e-05
	220	1	220	202.555	0.29	0.29	4967	152.733	3.38812e-05	1	0	3.25799e-07		0.0582343	220	0		49.822	152.733	0	2.28311e-05
	221	1	221	201.901	0.321	0.321	4841	146.753	3.38812e-05	1	0	3.60626e-07		0.0582343	221	0		55.1478	146.753	0	2.28311e-05
	222	1	222	199.576	0.383667	0.383667	4448	133.662	2.03287e-05	1	0	2.58617e-07		0.0582343	222	0		65.9139	133.662	1.42109e-14	1.36986e-05
	223	1	223	202.003	0.437	0.437	4282	126.926	2.03287e-05	1	0	2.94567e-07		0.0582343	223	0		75.0766	126.926	0	1.36986e-05
	224	1	224	207.453	0	0	5776	207.453	6.09862e-05	1	0	0		0.0582343	224	0		0	207.453	0	4.10959e-05
	225	1	225	209.305	0.00366667	0.00366667	5801	208.675	2.03287e-05	1	0	2.47158e-09		0.0582343	225	0		0.629933	208.675	-6.77236e-15	1.36986e-05
	226	1	226	207.563	0.095	0.095	5651	191.242	2.03287e-05	1	0	6.40364e-08		0.0582343	226	0		16.321	191.242	-7.10543e-15	1.36986e-05
	227	1	227	206.112	0.138667	0.138667	5572	182.289	2.03287e-05	1	0	9.34706e-08		0.0582343	227	0		23.8229	182.289	0	1.36986e-05
	228	1	228	207.944	0.186	0.186	5476	175.989	1.35525e-05	1	0	8.35843e-08		0.0582343	228	0		31.9548	175.989	3.55271e-15	9.13242e-06
	229	1	229	207.708	0.245125	0.245125	5269	165.595	5.421e-05	1	0	4.40615e-07		0.0582343	229	0		42.1125	165.595	1.42109e-14	3.65297e-05
	230	1	230	207.202	0.288875	0.288875	5119	157.574	5.421e-05	1	0	5.19256e-07		0.0582343	230	0		49.6287	157.574	0	3.65297e-05
	231	1	231	207.379	0.34675	0.34675	4880	147.807	5.421e-05	1	0	6.23287e-07		0.0582343	231	0		59.5717	147.807	0	3.65297e-05
	232	1	232	206.165	0.4135	0.4135	4531	135.126	1.35525e-05	1	0	1.85818e-07		0.0582343	232	0		71.0393	135.126	0	9.13242e-06
	233	1	233	205.187	0.4375	0.4375	4362	130.024	1.35525e-05	1	0	1.96603e-07		0.0582343	233	0		75.1625	130.024	1.42109e-14	9.13242e-06
	234	2	1	55.303	0	0	1953	55.303	6.53908e-06	1	0	0		0.0582343	234	0		0	55.303	0	4.56621e-06
	235	2	2	60.634	0	0	2133	60.634	0.00543398	1	0	0		0.0582343	235	0		0	60.634	0	0.00379452
	236	2	3	67.2351	0	0	2340	67.2351	0.0051528	1	0	0		0.0582343	236	0		0	67.2351	0	0.00359817
	237	2	4	69.6784	0.001	0.000995	2424	69.5075	6.53908e-06	1	0	2.15741e-10		0.0582343	237	0		0.170941	69.5075	-8.88178e-16	4.56621e-06
	238	2	5	76.2057	0	0	2665	76.2057	0.00360957	1	0	0		0.0582343	238	0		0	76.2057	0	0.00252055
	239	2	6	76.8501	0.001	0.000995	2703	76.6792	5.23126e-05	1	0	1.72593e-09		0.0582343	239	0		0.170941	76.6792	-8.88178e-16	3.65297e-05
	240	2	7	84.2604	0	0	2928	84.2604	0.00174593	1	0	0		0.0582343	240	0		0	84.2604	0	0.00121918
	241	2	8	91.784	0	0	3198	91.784	0.000673525	1	0	0		0.0582343	241	0		0	91.784	0	0.00047032
	242	2	9	96.5462	0.247	0.245765	1915	54.3238	6.53908e-06	1	0	5.3288e-08		0.0582343	242	0		42.2224	54.3238	0	4.56621e-06
	243	2	10	96.818	0.272	0.27064	1803	50.3221	6.53908e-06	1	0	5.86815e-08		0.0582343	243	0		46.496	50.3221	0	4.56621e-06
	244	2	11	98.8291	0	0	3477	98.8291	2.61563e-05	1	0	0		0.0582343	244	0		0	98.8291	0	1.82648e-05
	245	2	12	104.212	0.036	0.03582	3431	98.0577	1.96172e-05	1	0	2.33e-08		0.0582343	245	0		6.15388	98.0577	-4.44089e-15	1.36986e-05
	246	2	13	102.506	0.08652	0.0860874	3053	87.7159	0.000163477	1	0	4.66647e-07		0.0582343	246	0		14.7898	87.7159	-1.77636e-15	0.000114155
	247	2	14	103.171	0.134844	0.13417	2835	80.1208	0.000209251	1	0	9.30921e-07		0.0582343	247	0		23.0503	80.1208	-7.10543e-15	0.000146119
	248	2	15	102.046	0.184958	0.184034	2478	70.429	0.000156938	1	0	9.57673e-07		0.0582343	248	0		31.617	70.429	0	0.000109589
	249	2	16	102.431	0.2419	0.240691	2169	61.0808	0.000130782	1	0	1.04375e-06		0.0582343	249	0		41.3506	61.0808	0	9.13242e-05
	250	2	17	102.705	0.289714	0.288266	1878	53.1807	9.15471e-05	1	0	8.75045e-07		0.0582343	250	0		49.524	53.1807	0	6.39269e-05
	251	2	18	101.823	0.336357	0.334675	1650	44.3256	9.15471e-05	1	0	1.01592e-06		0.0582343	251	0		57.4972	44.3256	0	6.39269e-05
	252	2	19	101.584	0.402625	0.400612	1398	32.7594	0.000104625	1	0	1.3898e-06		0.0582343	252	0		68.8251	32.7594	0	7.30594e-05
	253	2	20	102.953	0.44596	0.44373	1264	26.7204	0.000163477	1	0	2.40529e-06		0.0582343	253	0		76.2328	26.7204	0	0.000114155
	254	2	21	102.19	0.49195	0.48949	1074	18.0954	0.000130782	1	0	2.12267e-06		0.0582343	254	0		84.0944	18.0954	0	9.13242e-05
	255	2	22	102.203	0.552833	0.550069	853	7.70069	7.8469e-05	1	0	1.43122e-06		0.0582343	255	0		94.5019	7.70069	0	5.47945e-05
	256	2	23	103.835	0.617	0.613915	1	0	3.26954e-05	0	0	0		0.0582343	256	0		103.835	0	0	2.28311e-05
	257	2	24	102.801	0.6566	0.653317	1	0	3.26954e-05	0	0	0		0.0582343	257	0		102.801	0	0	2.28311e-05
	258	2	25	103.461	0.713667	0.710098	1	0	1.96172e-05	0	0	0		0.0582343	258	0		103.461	0	0	1.36986e-05
	259	2	26	102.228	0.755667	0.751888	1	0	5.88517e-05	0	0	0		0.0582343	259	0		102.228	0	0	4.10959e-05
	260	2	27	102.221	0.813667	0.809598	1	0	1.96172e-05	0	0	0		0.0582343	260	0		102.221	0	0	1.36986e-05
	261	2	28	101.688	0.925	0.920375	1	0	6.53908e-06	0	0	0		0.0582343	261	0		101.688	0	0	4.56621e-06
	262	2	29	102.947	0.981	0.976095	1	0	1.30782e-05	0	0	0		0.0582343	262	0		102.947	0	0	9.13242e-06
	263	2	30	110.646	0	0	3791	110.646	0.00028118	1	0	0		0.0582343	263	0		0	110.646	0	0.000196347
	264	2	31	109.769	0.0178551	0.0177658	3730	106.716	0.000451197	1	0	2.65793e-07		0.0582343	264	0		3.05216	106.716	-2.22045e-15	0.000315068
	265	2	32	109.082	0.0840333	0.0836132	3303	94.7173	0.000392345	1	0	1.08776e-06		0.0582343	265	0		14.3647	94.7173	5.32907e-15	0.000273973
	266	2	33	109.423	0.128574	0.127931	3039	87.4443	0.00035311	1	0	1.49789e-06		0.0582343	266	0		21.9786	87.4443	3.55271e-15	0.000246575
	267	2	34	108.741	0.183067	0.182151	2748	77.4477	0.000294259	1	0	1.77727e-06		0.0582343	267	0		31.2936	77.4477	7.10543e-15	0.000205479
	268	2	35	108.805	0.237548	0.236361	2386	68.1978	0.000202712	1	0	1.58871e-06		0.0582343	268	0		40.6068	68.1978	7.10543e-15	0.000141553
	269	2	36	109.298	0.295351	0.293875	2087	58.8105	0.000241946	1	0	2.35762e-06		0.0582343	269	0		50.4877	58.8105	0	0.00016895
	270	2	37	109.847	0.342787	0.341073	1830	51.2505	0.000307337	1	0	3.4758e-06		0.0582343	270	0		58.5964	51.2505	0	0.000214612
	271	2	38	109.33	0.399018	0.397023	1583	41.1213	0.000366189	1	0	4.82073e-06		0.0582343	271	0		68.2085	41.1213	0	0.000255708
	272	2	39	110.062	0.45425	0.451979	1386	32.4121	0.000392345	1	0	5.88001e-06		0.0582343	272	0		77.6499	32.4121	0	0.000273973
	273	2	40	109.772	0.49622	0.493738	1223	24.9482	0.000268102	1	0	4.38925e-06		0.0582343	273	0		84.8243	24.9482	0	0.000187215
	274	2	41	110.381	0.552314	0.549553	1021	15.9679	0.000228868	1	0	4.17048e-06		0.0582343	274	0		94.4132	15.9679	0	0.000159817
	275	2	42	109.353	0.608087	0.605047	807	5.40619	0.000150399	1	0	3.01735e-06		0.0582343	275	0		103.947	5.40619	0	0.000105023
	276	2	43	110.156	0.6545	0.651228	1	0	0.00014386	0	0	0		0.0582343	276	0		110.156	0	0	0.000100457
	277	2	44	109.447	0.717048	0.713462	1	0	0.000137321	0	0	0		0.0582343	277	0		109.447	0	0	9.58904e-05
	278	2	45	110.025	0.768773	0.764929	1	0	0.00014386	0	0	0		0.0582343	278	0		110.025	0	0	0.000100457
	279	2	46	110.547	0.819667	0.815568	1	0	0.000176555	0	0	0		0.0582343	279	0		110.547	0	0	0.000123288
	280	2	47	110.378	0.87832	0.873928	1	0	0.000163477	0	0	0		0.0582343	280	0		110.378	0	0	0.000114155
	281	2	48	110.244	0.922417	0.917805	1	0	7.8469e-05	0	0	0		0.0582343	281	0		110.244	0	0	5.47945e-05
	282	2	49	110.88	0.980643	0.97574	1	0	9.15471e-05	0	0	0		0.0582343	282	0		110.88	0	0	6.39269e-05
	283	2	50	118.816	0	0	4070	118.816	0.000261563	1	0	0		0.0582343	283	0		0	118.816	0	0.000182648
	284	2	51	117.125	0.0209362	0.0208315	3933	113.546	0.000307337	1	0	2.12289e-07		0.0582343	284	0		3.57885	113.546	4.44089e-16	0.000214612
	285	2	52	116.764	0.090375	0.0899231	3548	101.315	0.000104625	1	0	3.11961e-07		0.0582343	285	0		15.4488	101.315	-5.32907e-15	7.30594e-05
	286	2	53	116.425	0.135152	0.134476	3251	93.3217	0.00021579	1	0	9.62204e-07		0.0582343	286	0		23.1029	93.3217	0	0.000150685
	287	2	54	116.405	0.183828	0.182908	2965	84.9812	0.000189633	1	0	1.15011e-06		0.0582343	287	0		31.4237	84.9812	7.10543e-15	0.00013242
	288	2	55	117.346	0.240125	0.238924	2691	76.2983	0.000156938	1	0	1.24331e-06		0.0582343	288	0		41.0472	76.2983	0	0.000109589
	289	2	56	117.873	0.2916	0.290142	2383	68.0262	0.000261563	1	0	2.5164e-06		0.0582343	289	0		49.8464	68.0262	0	0.000182648
	290	2	57	117.516	0.343423	0.341706	2088	58.8106	0.000340032	1	0	3.8527e-06		0.0582343	290	0		58.7051	58.8106	0	0.000237443
	291	2	58	116.704	0.39795	0.39596	1756	48.6778	0.000261563	1	0	3.43416e-06		0.0582343	291	0		68.026	48.6778	0	0.000182648
	292	2	59	117.607	0.453684	0.451416	1552	40.0542	0.000248485	1	0	3.71937e-06		0.0582343	292	0		77.5532	40.0542	0	0.000173516
	293	2	60	117.292	0.499838	0.497339	1370	31.8496	0.000241946	1	0	3.98991e-06		0.0582343	293	0		85.4428	31.8496	0	0.00016895
	294	2	61	117.694	0.55325	0.550484	1178	23.1211	0.000209251	1	0	3.81947e-06		0.0582343	294	0		94.5731	23.1211	0	0.000146119
	295	2	62	118.274	0.60769	0.604652	984	14.3949	0.000274641	1	0	5.50635e-06		0.0582343	295	0		103.879	14.3949	0	0.000191781
	296	2	63	118.248	0.66025	0.656949	805	5.38458	0.000183094	1	0	3.9884e-06		0.0582343	296	0		112.864	5.38458	0	0.000127854
	297	2	64	117.696	0.715436	0.711859	1	0	0.000255024	0	0	0		0.0582343	297	0		117.696	0	0	0.000178082
	298	2	65	116.683	0.76525	0.761424	1	0	0.000209251	0	0	0		0.0582343	298	0		116.683	0	0	0.000146119
	299	2	66	118.418	0.820378	0.816276	1	0	0.000294259	0	0	0		0.0582343	299	0		118.418	0	0	0.000205479
	300	2	67	117.778	0.874857	0.870483	1	0	0.000183094	0	0	0		0.0582343	300	0		117.778	0	0	0.000127854
	301	2	68	118.151	0.928135	0.923494	1	0	0.000241946	0	0	0		0.0582343	301	0		118.151	0	0	0.00016895
	302	2	69	117.277	0.980464	0.975562	1	0	0.000183094	0	0	0		0.0582343	302	0		117.277	0	0	0.000127854
	303	2	70	126.34	0	0	4254	126.34	0.000621213	1	0	0		0.0582343	303	0		0	126.34	0	0.00043379
	304	2	71	124.182	0.0251429	0.0250171	4120	119.884	9.15471e-05	1	0	7.59407e-08		0.0582343	304	0		4.29795	119.884	0	6.39269e-05
	305	2	72	125.135	0.0906667	0.0902133	3765	109.636	1.96172e-05	1	0	5.86815e-08		0.0582343	305	0		15.4987	109.636	-5.32907e-15	1.36986e-05
	306	2	73	125.637	0.130727	0.130074	3620	103.29	7.19299e-05	1	0	3.10235e-07		0.0582343	306	0		22.3467	103.29	3.55271e-15	5.02283e-05
	307	2	74	125.396	0.185417	0.18449	3264	93.7011	0.000156938	1	0	9.60046e-07		0.0582343	307	0		31.6953	93.7011	0	0.000109589
	308	2	75	126.125	0.23928	0.238084	2971	85.2226	0.000163477	1	0	1.29056e-06		0.0582343	308	0		40.9028	85.2226	0	0.000114155
	309	2	76	124.62	0.293667	0.292198	2625	74.42	0.000235407	1	0	2.28081e-06		0.0582343	309	0		50.1997	74.42	0	0.000164384
	310	2	77	126.205	0.342775	0.341061	2372	67.6104	0.000261563	1	0	2.95802e-06		0.0582343	310	0		58.5943	67.6104	0	0.000182648
	311	2	78	125.744	0.39875	0.396756	2053	57.5809	0.000209251	1	0	2.75285e-06		0.0582343	311	0		68.1627	57.5809	0	0.000146119
	312	2	79	125.514	0.450077	0.447827	1753	48.5773	0.000170016	1	0	2.5246e-06		0.0582343	312	0		76.9366	48.5773	0	0.000118721
	313	2	80	126.28	0.50075	0.498246	1569	40.6813	0.000235407	1	0	3.88916e-06		0.0582343	313	0		85.5987	40.6813	0	0.000164384
	314	2	81	126.137	0.553447	0.55068	1363	31.5305	0.000248485	1	0	4.53724e-06		0.0582343	314	0		94.6068	31.5305	0	0.000173516
	315	2	82	125.777	0.610903	0.607849	1135	21.3486	0.000202712	1	0	4.0857e-06		0.0582343	315	0		104.428	21.3486	0	0.000141553
	316	2	83	125.425	0.659683	0.656385	948	12.6581	0.000268102	1	0	5.83514e-06		0.0582343	316	0		112.767	12.6581	0	0.000187215
	317	2	84	126.231	0.710953	0.707399	791	4.69987	0.00028118	1	0	6.59541e-06		0.0582343	317	0		121.531	4.69987	0	0.000196347
	318	2	85	125.541	0.768714	0.764871	1	0	0.000183094	0	0	0		0.0582343	318	0		125.541	0	0	0.000127854
	319	2	86	125.729	0.816913	0.812828	1	0	0.000150399	0	0	0		0.0582343	319	0		125.729	0	0	0.000105023
	320	2	87	126.192	0.871	0.866645	1	0	0.000117703	0	0	0		0.0582343	320	0		126.192	0	0	8.21918e-05
	321	2	88	125.103	0.926333	0.921702	1	0	0.000196172	0	0	0		0.0582343	321	0		125.103	0	0	0.000136986
	322	2	89	125.75	0.9791	0.974204	1	0	0.000130782	0	0	0		0.0582343	322	0		125.75	0	0	9.13242e-05
	323	2	90	134.327	0	0	4479	134.327	0.00117703	1	0	0		0.0582343	323	0		0	134.327	0	0.000821918
	324	2	91	136.75	0.0153438	0.015267	4459	134.127	0.000209251	1	0	1.05929e-07		0.0582343	324	0		2.62288	134.127	7.99361e-15	0.000146119
	325	2	92	136.469	0.0724118	0.0720497	4227	124.091	0.000111164	1	0	2.65577e-07		0.0582343	325	0		12.3781	124.091	0	7.76256e-05
	326	2	93	134.546	0.135733	0.135055	3846	111.344	9.80862e-05	1	0	4.39248e-07		0.0582343	326	0		23.2024	111.344	3.55271e-15	6.84932e-05
	327	2	94	135.385	0.189214	0.188268	3611	103.041	9.15471e-05	1	0	5.71497e-07		0.0582343	327	0		32.3445	103.041	-7.10543e-15	6.39269e-05
	328	2	95	134.573	0.25	0.24875	3224	91.8374	9.80862e-05	1	0	8.09028e-07		0.0582343	328	0		42.7353	91.8374	7.10543e-15	6.84932e-05
	329	2	96	134.833	0.29132	0.289863	2967	85.0345	0.000163477	1	0	1.57124e-06		0.0582343	329	0		49.7985	85.0345	-7.10543e-15	0.000114155
	330	2	97	134.181	0.345154	0.343428	2640	75.1797	0.000170016	1	0	1.93606e-06		0.0582343	330	0		59.0009	75.1797	-7.10543e-15	0.000118721
	331	2	98	135.806	0.404889	0.402864	2329	66.5937	0.000117703	1	0	1.57232e-06		0.0582343	331	0		69.2121	66.5937	0	8.21918e-05
	332	2	99	134.166	0.447375	0.445138	2057	57.691	0.000104625	1	0	1.54427e-06		0.0582343	332	0		76.4747	57.691	0	7.30594e-05
	333	2	100	134.177	0.505611	0.503083	1728	47.7475	0.000117703	1	0	1.96346e-06		0.0582343	333	0		86.4297	47.7475	0	8.21918e-05
	334	2	101	134.205	0.555056	0.55228	1533	39.3237	0.000117703	1	0	2.15547e-06		0.0582343	334	0		94.8818	39.3237	0	8.21918e-05
	335	2	102	134.126	0.606406	0.603374	1340	30.4664	0.000209251	1	0	4.18645e-06		0.0582343	335	0		103.66	30.4664	0	0.000146119
	336	2	103	133.839	0.657083	0.653798	1141	21.5163	0.000156938	1	0	3.40223e-06		0.0582343	336	0		112.322	21.5163	0	0.000109589
	337	2	104	132.593	0.706895	0.70336	931	11.7559	0.000124243	1	0	2.89761e-06		0.0582343	337	0		120.837	11.7559	0	8.6758e-05
	338	2	105	134.937	0.769944	0.766095	770	3.32171	0.000117703	1	0	2.98995e-06		0.0582343	338	0		131.615	3.32171	0	8.21918e-05
	339	2	106	134.452	0.825083	0.820958	1	0	0.000156938	0	0	0		0.0582343	339	0		134.452	0	0	0.000109589
	340	2	107	133.689	0.8768	0.872416	1	0	6.53908e-05	0	0	0		0.0582343	340	0		133.689	0	0	4.56621e-05
	341	2	108	134.382	0.930111	0.925461	1	0	0.000117703	0	0	0		0.0582343	341	0		134.382	0	0	8.21918e-05
	342	2	109	134.432	0.9891	0.984154	1	0	6.53908e-05	0	0	0		0.0582343	342	0		134.432	0	0	4.56621e-05
	343	2	110	142.322	0	0	4723	142.322	0.00126858	1	0	0		0.0582343	343	0		0	142.322	0	0.000885845
	344	2	111	142.163	0.0132235	0.0131574	4686	139.903	0.00111164	1	0	4.84985e-07		0.0582343	344	0		2.26044	139.903	-1.24345e-14	0.000776256
	345	2	112	142.825	0.0753415	0.0749648	4356	129.946	0.000268102	1	0	6.66423e-07		0.0582343	345	0		12.8789	129.946	-1.77636e-15	0.000187215
	346	2	113	143.775	0.133	0.132335	4171	121.04	0.000235407	1	0	1.03297e-06		0.0582343	346	0		22.7352	121.04	0	0.000164384
	347	2	114	142.756	0.18681	0.185875	3823	110.822	0.000137321	1	0	8.46351e-07		0.0582343	347	0		31.9334	110.822	3.55271e-15	9.58904e-05
	348	2	115	142.655	0.238765	0.237571	3565	101.84	0.000111164	1	0	8.75692e-07		0.0582343	348	0		40.8147	101.84	0	7.76256e-05
	349	2	116	142.988	0.290258	0.288807	3252	93.3714	0.000202712	1	0	1.94124e-06		0.0582343	349	0		49.617	93.3714	-7.10543e-15	0.000141553
	350	2	117	142.957	0.339292	0.337595	2964	84.9586	0.000156938	1	0	1.75678e-06		0.0582343	350	0		57.9989	84.9586	0	0.000109589
	351	2	118	143.236	0.395444	0.393467	2648	75.6383	0.000176555	1	0	2.30346e-06		0.0582343	351	0		67.5977	75.6383	0	0.000123288
	352	2	119	143.03	0.447333	0.445097	2328	66.5621	0.000176555	1	0	2.60572e-06		0.0582343	352	0		76.4676	66.5621	0	0.000123288
	353	2	120	142.977	0.501176	0.498671	2044	57.3052	0.000111164	1	0	1.83811e-06		0.0582343	353	0		85.6716	57.3052	0	7.76256e-05
	354	2	121	141.839	0.557545	0.554758	1696	46.5314	7.19299e-05	1	0	1.32314e-06		0.0582343	354	0		95.3074	46.5314	0	5.02283e-05
	355	2	122	143.27	0.60575	0.602721	1545	39.722	0.000104625	1	0	2.09096e-06		0.0582343	355	0		103.548	39.722	0	7.30594e-05
	356	2	123	142.824	0.655647	0.652369	1343	30.7467	0.000111164	1	0	2.40465e-06		0.0582343	356	0		112.077	30.7467	0	7.76256e-05
	357	2	124	139.822	0.714889	0.711314	1061	17.6178	5.88517e-05	1	0	1.38808e-06		0.0582343	357	0		122.204	17.6178	0	4.10959e-05
	358	2	125	141.678	0.7718	0.767941	896	9.74612	3.26954e-05	1	0	8.32544e-07		0.0582343	358	0		131.932	9.74612	0	2.28311e-05
	359	2	126	142.728	0.8206	0.816497	755	2.45416	6.53908e-05	1	0	1.77037e-06		0.0582343	359	0		140.274	2.45416	0	4.56621e-05
	360	2	127	141.412	0.8685	0.864158	1	0	3.92345e-05	0	0	0		0.0582343	360	0		141.412	0	0	2.73973e-05
	361	2	128	143.456	0.938286	0.933594	1	0	4.57736e-05	0	0	0		0.0582343	361	0		143.456	0	0	3.19635e-05
	362	2	129	143.297	0.994	0.98903	1	0	3.26954e-05	0	0	0		0.0582343	362	0		143.297	0	0	2.28311e-05
	363	2	130	149.521	0	0	4907	149.521	0.000398884	1	0	0		0.0582343	363	0		0	149.521	0	0.000278539
	364	2	131	149.742	0.0256486	0.0255204	4785	145.358	0.000241946	1	0	2.04738e-07		0.0582343	364	0		4.38441	145.358	2.66454e-15	0.00016895
	365	2	132	150.706	0.0837358	0.0833172	4569	136.392	0.000346571	1	0	9.57457e-07		0.0582343	365	0		14.3139	136.392	1.06581e-14	0.000242009
	366	2	133	150.566	0.13393	0.13326	4292	127.672	0.000372728	1	0	1.64696e-06		0.0582343	366	0		22.8941	127.672	-7.10543e-15	0.000260274
	367	2	134	150.954	0.1874	0.186463	4096	118.92	0.000294259	1	0	1.81934e-06		0.0582343	367	0		32.0343	118.92	0	0.000205479
	368	2	135	151.609	0.2375	0.236312	3831	111.01	0.000209251	1	0	1.63963e-06		0.0582343	368	0		40.5985	111.01	7.10543e-15	0.000146119
	369	2	136	150.593	0.2935	0.292032	3529	100.421	0.000183094	1	0	1.77296e-06		0.0582343	369	0		50.1712	100.421	0	0.000127854
	370	2	137	151.352	0.342488	0.340776	3239	92.8072	0.00028118	1	0	3.17721e-06		0.0582343	370	0		58.5453	92.8072	0	0.000196347
	371	2	138	150.26	0.396147	0.394166	2907	82.5425	0.000222329	1	0	2.90581e-06		0.0582343	371	0		67.7178	82.5425	0	0.000155251
	372	2	139	150.624	0.451	0.448745	2599	73.5296	0.000228868	1	0	3.40547e-06		0.0582343	372	0		77.0944	73.5296	0	0.000159817
	373	2	140	150.324	0.50384	0.501321	2265	64.1971	0.000163477	1	0	2.71747e-06		0.0582343	373	0		86.1269	64.1971	0	0.000114155
	374	2	141	149.989	0.551333	0.548577	1991	55.744	3.92345e-05	1	0	7.1367e-07		0.0582343	374	0		94.2455	55.744	0	2.73973e-05
	375	2	142	150.834	0.611308	0.608251	1692	46.3363	8.50081e-05	1	0	1.71449e-06		0.0582343	375	0		104.498	46.3363	0	5.93607e-05
	376	2	143	150.73	0.646333	0.643102	1558	40.2451	3.92345e-05	1	0	8.36643e-07		0.0582343	376	0		110.485	40.2451	0	2.73973e-05
	377	2	144	151.634	0.709667	0.706118	1334	30.3228	1.96172e-05	1	0	4.59312e-07		0.0582343	377	0		121.311	30.3228	0	1.36986e-05
	378	2	145	147.687	0.773	0.769135	1009	15.5496	6.53908e-06	1	0	1.66768e-07		0.0582343	378	0		132.137	15.5496	0	4.56621e-06
	379	2	146	151.495	0.819	0.814905	927	11.4945	3.26954e-05	1	0	8.83458e-07		0.0582343	379	0		140.001	11.4945	0	2.28311e-05
	380	2	147	149.936	0.87275	0.868386	726	0.747482	2.61563e-05	1	0	7.53151e-07		0.0582343	380	0		149.189	0.747482	0	1.82648e-05
	381	2	148	150.126	0.969	0.964155	1	0	1.30782e-05	0	0	0		0.0582343	381	0		150.126	0	0	9.13242e-06
	382	2	149	160.217	0	0	5137	160.217	0.00035311	1	0	0		0.0582343	382	0		0	160.217	0	0.000246575
	383	2	150	159.223	0.023	0.022885	5012	155.292	4.57736e-05	1	0	3.47343e-08		0.0582343	383	0		3.93164	155.292	7.99361e-15	3.19635e-05
	384	2	151	159.405	0.0758214	0.0754423	4830	146.444	0.000183094	1	0	4.58018e-07		0.0582343	384	0		12.961	146.444	-8.88178e-15	0.000127854
	385	2	152	159.512	0.129875	0.129226	4608	137.311	0.000156938	1	0	6.72464e-07		0.0582343	385	0		22.201	137.311	-1.42109e-14	0.000109589
	386	2	153	159.325	0.183613	0.182695	4299	127.938	0.000202712	1	0	1.228e-06		0.0582343	386	0		31.387	127.938	3.55271e-15	0.000141553
	387	2	154	158.13	0.239889	0.238689	4036	117.123	0.000235407	1	0	1.86314e-06		0.0582343	387	0		41.0068	117.123	7.10543e-15	0.000164384
	388	2	155	159.159	0.290781	0.289327	3762	109.453	0.000209251	1	0	2.00747e-06		0.0582343	388	0		49.7064	109.453	7.10543e-15	0.000146119
	389	2	156	157.824	0.346273	0.344541	3467	98.6321	0.00014386	1	0	1.64351e-06		0.0582343	389	0		59.1922	98.6321	0	0.000100457
	390	2	157	157.778	0.401632	0.399623	3128	89.1223	0.000124243	1	0	1.64632e-06		0.0582343	390	0		68.6553	89.1223	0	8.6758e-05
	391	2	158	157.376	0.4458	0.443571	2873	81.1704	0.000130782	1	0	1.92354e-06		0.0582343	391	0		76.2055	81.1704	0	9.13242e-05
	392	2	159	158.516	0.499	0.496505	2588	73.2169	6.53908e-05	1	0	1.07655e-06		0.0582343	392	0		85.2996	73.2169	0	4.56621e-05
	393	2	160	159.935	0.563333	0.560517	2247	63.638	1.96172e-05	1	0	3.64602e-07		0.0582343	393	0		96.2968	63.638	0	1.36986e-05
	394	2	161	158.375	0.612	0.60894	1896	53.759	1.96172e-05	1	0	3.961e-07		0.0582343	394	0		104.616	53.759	0	1.36986e-05
	395	2	162	161.812	0.6575	0.654212	1777	49.4179	1.30782e-05	1	0	2.83699e-07		0.0582343	395	0		112.394	49.4179	0	9.13242e-06
	396	2	163	162.289	0.708	0.70446	1587	41.2625	6.53908e-06	1	0	1.52744e-07		0.0582343	396	0		121.026	41.2625	0	4.56621e-06
	397	2	164	157.881	0.7685	0.764657	1262	26.5124	1.30782e-05	1	0	3.31594e-07		0.0582343	397	0		131.368	26.5124	0	9.13242e-06
	398	2	165	159.099	0.8245	0.820377	1075	18.1585	1.30782e-05	1	0	3.55757e-07		0.0582343	398	0		140.941	18.1585	0	9.13242e-06
	399	2	166	167.701	0	0	5312	167.701	0.000666986	1	0	0		0.0582343	399	0		0	167.701	0	0.000465753
	400	2	167	168.938	0.0155641	0.0154863	5278	166.278	0.000255024	1	0	1.30955e-07		0.0582343	400	0		2.66054	166.278	-6.21725e-15	0.000178082
	401	2	168	168.498	0.07675	0.0763663	5021	155.378	0.000209251	1	0	5.29859e-07		0.0582343	401	0		13.1197	155.378	-5.32907e-15	0.000146119
	402	2	169	167.979	0.129333	0.128687	4816	145.871	0.000176555	1	0	7.53367e-07		0.0582343	402	0		22.1084	145.871	7.10543e-15	0.000123288
	403	2	170	166.873	0.185706	0.184777	4532	135.128	0.000222329	1	0	1.36219e-06		0.0582343	403	0		31.7447	135.128	-7.10543e-15	0.000155251
	404	2	171	167.446	0.235059	0.233884	4285	127.264	0.000111164	1	0	8.621e-07		0.0582343	404	0		40.1812	127.264	-7.10543e-15	7.76256e-05
	405	2	172	167.294	0.290167	0.288716	4047	117.693	0.000156938	1	0	1.50242e-06		0.0582343	405	0		49.6014	117.693	0	0.000109589
	406	2	173	168.018	0.337545	0.335858	3782	110.318	7.19299e-05	1	0	8.01045e-07		0.0582343	406	0		57.7004	110.318	-7.10543e-15	5.02283e-05
	407	2	174	165.211	0.390857	0.388903	3453	98.398	4.57736e-05	1	0	5.90267e-07		0.0582343	407	0		66.8135	98.398	0	3.19635e-05
	408	2	175	169.271	0.438	0.43581	3290	94.3988	1.30782e-05	1	0	1.88989e-07		0.0582343	408	0		74.8722	94.3988	0	9.13242e-06
	409	2	176	168.095	0.502333	0.499822	2899	82.2255	5.88517e-05	1	0	9.75364e-07		0.0582343	409	0		85.8694	82.2255	0	4.10959e-05
	410	2	177	167.408	0.572	0.56914	2452	69.6293	3.26954e-05	1	0	6.17019e-07		0.0582343	410	0		97.7783	69.6293	0	2.28311e-05
	411	2	178	168.09	0.616	0.61292	2221	62.7901	1.30782e-05	1	0	2.65793e-07		0.0582343	411	0		105.3	62.7901	0	9.13242e-06
	412	2	179	164.989	0.642	0.63879	1951	55.2445	6.53908e-06	1	0	1.38506e-07		0.0582343	412	0		109.744	55.2445	0	4.56621e-06
	413	2	180	175.732	0	0	5451	175.732	0.0011705	1	0	0		0.0582343	413	0		0	175.732	0	0.000817352
	414	2	181	175.992	0.0167	0.0166165	5419	173.137	0.000915471	1	0	5.04402e-07		0.0582343	414	0		2.85471	173.137	-8.43769e-15	0.000639269
	415	2	182	175.755	0.0768308	0.0764466	5183	162.621	0.00042504	1	0	1.07741e-06		0.0582343	415	0		13.1335	162.621	7.10543e-15	0.000296804
	416	2	183	177.01	0.1275	0.126862	5010	155.215	0.000156938	1	0	6.60167e-07		0.0582343	416	0		21.795	155.215	-7.10543e-15	0.000109589
	417	2	184	175.128	0.188833	0.187889	4752	142.849	0.000117703	1	0	7.33303e-07		0.0582343	417	0		32.2794	142.849	-7.10543e-15	8.21918e-05
	418	2	185	176.078	0.243684	0.242466	4513	134.422	0.000124243	1	0	9.9888e-07		0.0582343	418	0		41.6556	134.422	-7.10543e-15	8.6758e-05
	419	2	186	175.807	0.292143	0.290682	4252	125.868	9.15471e-05	1	0	8.8238e-07		0.0582343	419	0		49.9392	125.868	0	6.39269e-05
	420	2	187	175.31	0.3449	0.343175	4024	116.353	6.53908e-05	1	0	7.4409e-07		0.0582343	420	0		58.9576	116.353	0	4.56621e-05
	421	2	188	176.994	0.384333	0.382412	3843	111.296	3.92345e-05	1	0	4.97498e-07		0.0582343	421	0		65.6983	111.296	0	2.73973e-05
	422	2	189	175.086	0.452	0.44974	3425	97.8211	1.30782e-05	1	0	1.9503e-07		0.0582343	422	0		77.2653	97.8211	0	9.13242e-06
	423	2	190	175.616	0.5008	0.498296	3166	90.0088	3.26954e-05	1	0	5.40215e-07		0.0582343	423	0		85.6073	90.0088	0	2.28311e-05
	424	2	191	177.425	0.5524	0.549638	2913	82.9967	3.26954e-05	1	0	5.95876e-07		0.0582343	424	0		94.4278	82.9967	0	2.28311e-05
	425	2	192	174.325	0.612667	0.609603	2450	69.5954	1.96172e-05	1	0	3.96532e-07		0.0582343	425	0		104.73	69.5954	0	1.36986e-05
	426	2	193	174.32	0.638	0.63481	2302	65.2598	6.53908e-06	1	0	1.37643e-07		0.0582343	426	0		109.06	65.2598	0	4.56621e-06
	427	2	194	184.763	0	0	5598	184.763	0.0017394	1	0	0		0.0582343	427	0		0	184.763	0	0.00121461
	428	2	195	183.108	0.0169167	0.0168321	5527	180.216	0.000627752	1	0	3.50363e-07		0.0582343	428	0		2.89175	180.216	-1.77636e-15	0.000438356
	429	2	196	184.325	0.0775345	0.0771468	5361	171.071	0.000379267	1	0	9.70186e-07		0.0582343	429	0		13.2538	171.071	3.55271e-15	0.00026484
	430	2	197	184.26	0.1245	0.123878	5192	162.978	0.000222329	1	0	9.13231e-07		0.0582343	430	0		21.2822	162.978	-1.42109e-14	0.000155251
	431	2	198	184.898	0.183	0.182085	4978	153.615	0.000137321	1	0	8.29092e-07		0.0582343	431	0		31.2822	153.615	7.10543e-15	9.58904e-05
	432	2	199	183.541	0.238889	0.237694	4751	142.705	0.000117703	1	0	9.27685e-07		0.0582343	432	0		40.8359	142.705	-1.42109e-14	8.21918e-05
	433	2	200	183.235	0.2935	0.292032	4441	133.064	2.61563e-05	1	0	2.5328e-07		0.0582343	433	0		50.1712	133.064	-1.42109e-14	1.82648e-05
	434	2	201	184.653	0.318	0.31641	4374	130.294	6.53908e-06	1	0	6.86056e-08		0.0582343	434	0		54.3592	130.294	0	4.56621e-06
	435	2	202	180.366	0.411	0.408945	3777	110.109	6.53908e-06	1	0	8.86695e-08		0.0582343	435	0		70.2568	110.109	0	4.56621e-06
	436	2	203	182.571	0.446667	0.444433	3722	106.217	1.96172e-05	1	0	2.89093e-07		0.0582343	436	0		76.3536	106.217	0	1.36986e-05
	437	2	204	183.114	0.505667	0.503138	3399	96.6745	1.96172e-05	1	0	3.27279e-07		0.0582343	437	0		86.4392	96.6745	0	1.36986e-05
	438	2	205	183.726	0.56	0.5572	3068	87.999	6.53908e-06	1	0	1.20815e-07		0.0582343	438	0		95.727	87.999	0	4.56621e-06
	439	2	206	192.03	0	0	5661	192.03	0.00153014	1	0	0		0.0582343	439	0		0	192.03	0	0.00106849
	440	2	207	193.951	0.00839583	0.00835385	5694	192.515	0.000313876	1	0	8.69435e-08		0.0582343	440	0		1.43519	192.515	-7.54952e-15	0.000219178
	441	2	208	193.238	0.0707333	0.0703797	5552	181.146	9.80862e-05	1	0	2.28901e-07		0.0582343	441	0		12.0912	181.146	7.10543e-15	6.84932e-05
	442	2	209	193.857	0.132	0.13134	5367	171.293	7.8469e-05	1	0	3.41733e-07		0.0582343	442	0		22.5642	171.293	-7.10543e-15	5.47945e-05
	443	2	210	194.57	0.183667	0.182748	5200	163.174	3.92345e-05	1	0	2.37746e-07		0.0582343	443	0		31.3962	163.174	0	2.73973e-05
	444	2	211	192.258	0.226	0.22487	4979	153.625	1.30782e-05	1	0	9.75148e-08		0.0582343	444	0		38.6327	153.625	0	9.13242e-06
	445	2	212	192.907	0.27	0.26865	4840	146.753	6.53908e-06	1	0	5.825e-08		0.0582343	445	0		46.1541	146.753	1.42109e-14	4.56621e-06
	446	2	213	190.791	0.456	0.45372	3904	112.842	6.53908e-06	1	0	9.83778e-08		0.0582343	446	0		77.9491	112.842	0	4.56621e-06
	447	2	214	200.029	0	0	5751	200.029	0.000699682	1	0	0		0.0582343	447	0		0	200.029	0	0.000488584
	448	2	215	199.731	0.0035	0.0034825	5727	199.133	0.000300798	1	0	3.47343e-08		0.0582343	448	0		0.598294	199.133	1.07692e-14	0.000210046
	449	2	216	201.421	0.0872222	0.0867861	5627	186.511	5.88517e-05	1	0	1.69356e-07		0.0582343	449	0		14.9099	186.511	1.42109e-14	4.10959e-05
	450	2	217	200.136	0.1361	0.135419	5483	176.871	6.53908e-05	1	0	2.93623e-07		0.0582343	450	0		23.2651	176.871	0	4.56621e-05
	451	2	218	201.582	0.185364	0.184437	5349	169.896	7.19299e-05	1	0	4.39895e-07		0.0582343	451	0		31.6862	169.896	1.42109e-14	5.02283e-05
	452	2	219	201.223	0.234	0.23283	5168	161.223	2.61563e-05	1	0	2.01933e-07		0.0582343	452	0		40.0002	161.223	-7.10543e-15	1.82648e-05
	453	2	220	202.555	0.29	0.28855	4970	152.982	3.26954e-05	1	0	3.12824e-07		0.0582343	453	0		49.5729	152.982	0	2.28311e-05
	454	2	221	201.901	0.321	0.319395	4852	147.029	3.26954e-05	1	0	3.46264e-07		0.0582343	454	0		54.8721	147.029	-7.10543e-15	2.28311e-05
	455	2	222	199.576	0.383667	0.381748	4454	133.991	1.96172e-05	1	0	2.48318e-07		0.0582343	455	0		65.5844	133.991	0	1.36986e-05
	456	2	223	202.003	0.437	0.434815	4286	127.302	1.96172e-05	1	0	2.82836e-07		0.0582343	456	0		74.7012	127.302	0	1.36986e-05
	457	2	224	207.453	0	0	5776	207.453	5.88517e-05	1	0	0		0.0582343	457	0		0	207.453	0	4.10959e-05
	458	2	225	209.305	0.00366667	0.00364833	5802	208.678	1.96172e-05	1	0	2.37315e-09		0.0582343	458	0		0.626784	208.678	-1.27676e-14	1.36986e-05
	459	2	226	207.563	0.095	0.094525	5652	191.323	1.96172e-05	1	0	6.14861e-08		0.0582343	459	0		16.2394	191.323	0	1.36986e-05
	460	2	227	206.112	0.138667	0.137973	5575	182.408	1.96172e-05	1	0	8.97482e-08		0.0582343	460	0		23.7038	182.408	3.55271e-15	1.36986e-05
	461	2	228	207.944	0.186	0.18507	5477	176.149	1.30782e-05	1	0	8.02556e-08		0.0582343	461	0		31.795	176.149	7.10543e-15	9.13242e-06
	462	2	229	207.708	0.245125	0.243899	5271	165.806	5.23126e-05	1	0	4.23068e-07		0.0582343	462	0		41.9019	165.806	-7.10543e-15	3.65297e-05
	463	2	230	207.202	0.288875	0.287431	5123	157.822	5.23126e-05	1	0	4.98577e-07		0.0582343	463	0		49.3806	157.822	1.42109e-14	3.65297e-05
	464	2	231	207.379	0.34675	0.345016	4887	148.105	5.23126e-05	1	0	5.98465e-07		0.0582343	464	0		59.2738	148.105	7.10543e-15	3.65297e-05
	465	2	232	206.165	0.4135	0.411432	4543	135.481	1.30782e-05	1	0	1.78418e-07		0.0582343	465	0		70.6841	135.481	-1.42109e-14	9.13242e-06
	466	2	233	205.187	0.4375	0.435312	4379	130.4	1.30782e-05	1	0	1.88773e-07		0.0582343	466	0		74.7867	130.4	0	9.13242e-06
	467	3	1	55.303	0	0	1953	55.303	6.31021e-06	1	0	0		0.0582343	467	0		0	55.303	0	4.56621e-06
	468	3	2	60.634	0	0	2133	60.634	0.00524379	1	0	0		0.0582343	468	0		0	60.634	0	0.00379452
	469	3	3	67.2351	0	0	2340	67.2351	0.00497245	1	0	0		0.0582343	469	0		0	67.2351	0	0.00359817
	470	3	4	69.6784	0.001	0.000990025	2425	69.5083	6.31021e-06	1	0	2.07149e-10		0.0582343	470	0		0.170086	69.5083	4.35763e-15	4.56621e-06
	471	3	5	76.2057	0	0	2665	76.2057	0.00348324	1	0	0		0.0582343	471	0		0	76.2057	0	0.00252055
	472	3	6	76.8501	0.001	0.000990025	2704	76.6801	5.04817e-05	1	0	1.65719e-09		0.0582343	472	0		0.170086	76.6801	4.35763e-15	3.65297e-05
	473	3	7	84.2604	0	0	2928	84.2604	0.00168483	1	0	0		0.0582343	473	0		0	84.2604	0	0.00121918
	474	3	8	91.784	0	0	3198	91.784	0.000649952	1	0	0		0.0582343	474	0		0	91.784	0	0.00047032
	475	3	9	96.5462	0.247	0.244536	1924	54.5349	6.31021e-06	1	0	5.11658e-08		0.0582343	475	0		42.0113	54.5349	0	4.56621e-06
	476	3	10	96.818	0.272	0.269287	1810	50.5545	6.31021e-06	1	0	5.63445e-08		0.0582343	476	0		46.2635	50.5545	0	4.56621e-06
	477	3	11	98.8291	0	0	3477	98.8291	2.52409e-05	1	0	0		0.0582343	477	0		0	98.8291	0	1.82648e-05
	478	3	12	104.212	0.036	0.0356409	3434	98.0884	1.89306e-05	1	0	2.23721e-08		0.0582343	478	0		6.12311	98.0884	8.88178e-16	1.36986e-05
	479	3	13	102.506	0.08652	0.085657	3057	87.7898	0.000157755	1	0	4.48063e-07		0.0582343	479	0		14.7159	87.7898	-5.32907e-15	0.000114155
	480	3	14	103.171	0.134844	0.133499	2841	80.236	0.000201927	1	0	8.93847e-07		0.0582343	480	0		22.9351	80.236	0	0.000146119
	481	3	15	102.046	0.184958	0.183113	2483	70.5871	0.000151445	1	0	9.19534e-07		0.0582343	481	0		31.4589	70.5871	0	0.000109589
	482	3	16	102.431	0.2419	0.239487	2177	61.2876	0.000126204	1	0	1.00219e-06		0.0582343	482	0		41.1439	61.2876	0	9.13242e-05
	483	3	17	102.705	0.289714	0.286824	1887	53.4283	8.8343e-05	1	0	8.40196e-07		0.0582343	483	0		49.2764	53.4283	0	6.39269e-05
	484	3	18	101.823	0.336357	0.333002	1656	44.613	8.8343e-05	1	0	9.75464e-07		0.0582343	484	0		57.2097	44.613	0	6.39269e-05
	485	3	19	101.584	0.402625	0.398609	1408	33.1035	0.000100963	1	0	1.33445e-06		0.0582343	485	0		68.481	33.1035	0	7.30594e-05
	486	3	20	102.953	0.44596	0.441512	1274	27.1015	0.000157755	1	0	2.3095e-06		0.0582343	486	0		75.8517	27.1015	0	0.000114155
	487	3	21	102.19	0.49195	0.487043	1083	18.5158	0.000126204	1	0	2.03814e-06		0.0582343	487	0		83.674	18.5158	0	9.13242e-05
	488	3	22	102.203	0.552833	0.547319	865	8.1732	7.57226e-05	1	0	1.37423e-06		0.0582343	488	0		94.0294	8.1732	0	5.47945e-05
	489	3	23	103.835	0.617	0.610845	1	0	3.15511e-05	0	0	0		0.0582343	489	0		103.835	0	0	2.28311e-05
	490	3	24	102.801	0.6566	0.65005	1	0	3.15511e-05	0	0	0		0.0582343	490	0		102.801	0	0	2.28311e-05
	491	3	25	103.461	0.713667	0.706548	1	0	1.89306e-05	0	0	0		0.0582343	491	0		103.461	0	0	1.36986e-05
	492	3	26	102.228	0.755667	0.748129	1	0	5.67919e-05	0	0	0		0.0582343	492	0		102.228	0	0	4.10959e-05
	493	3	27	102.221	0.813667	0.80555	1	0	1.89306e-05	0	0	0		0.0582343	493	0		102.221	0	0	1.36986e-05
	494	3	28	101.688	0.925	0.915773	1	0	6.31021e-06	0	0	0		0.0582343	494	0		101.688	0	0	4.56621e-06
	495	3	29	102.947	0.981	0.971215	1	0	1.26204e-05	0	0	0		0.0582343	495	0		102.947	0	0	9.13242e-06
	496	3	30	110.646	0	0	3791	110.646	0.000271339	1	0	0		0.0582343	496	0		0	110.646	0	0.000196347
	497	3	31	109.769	0.0178551	0.017677	3731	106.732	0.000435405	1	0	2.55207e-07		0.0582343	497	0		3.0369	106.732	6.66134e-15	0.000315068
	498	3	32	109.082	0.0840333	0.0831951	3308	94.7891	0.000378613	1	0	1.04444e-06		0.0582343	498	0		14.2929	94.7891	3.55271e-15	0.000273973
	499	3	33	109.423	0.128574	0.127292	3045	87.5542	0.000340752	1	0	1.43823e-06		0.0582343	499	0		21.8687	87.5542	7.10543e-15	0.000246575
	500	3	34	108.741	0.183067	0.181241	2752	77.6042	0.00028396	1	0	1.70649e-06		0.0582343	500	0		31.1371	77.6042	0	0.000205479
	501	3	35	108.805	0.237548	0.235179	2390	68.4009	0.000195617	1	0	1.52544e-06		0.0582343	501	0		40.4037	68.4009	0	0.000141553
	502	3	36	109.298	0.295351	0.292405	2096	59.0629	0.000233478	1	0	2.26372e-06		0.0582343	502	0		50.2352	59.0629	0	0.00016895
	503	3	37	109.847	0.342787	0.339368	1835	51.5435	0.00029658	1	0	3.33738e-06		0.0582343	503	0		58.3034	51.5435	0	0.000214612
	504	3	38	109.33	0.399018	0.395038	1594	41.4624	0.000353372	1	0	4.62874e-06		0.0582343	504	0		67.8675	41.4624	0	0.000255708
	505	3	39	110.062	0.45425	0.449719	1399	32.8003	0.000378613	1	0	5.64584e-06		0.0582343	505	0		77.2617	32.8003	0	0.000273973
	506	3	40	109.772	0.49622	0.49127	1233	25.3723	0.000258719	1	0	4.21444e-06		0.0582343	506	0		84.4001	25.3723	0	0.000187215
	507	3	41	110.381	0.552314	0.546805	1031	16.4399	0.000220857	1	0	4.0044e-06		0.0582343	507	0		93.9411	16.4399	0	0.000159817
	508	3	42	109.353	0.608087	0.602021	815	5.92593	0.000145135	1	0	2.89718e-06		0.0582343	508	0		103.427	5.92593	0	0.000105023
	509	3	43	110.156	0.6545	0.647971	1	0	0.000138825	0	0	0		0.0582343	509	0		110.156	0	0	0.000100457
	510	3	44	109.447	0.717048	0.709895	1	0	0.000132514	0	0	0		0.0582343	510	0		109.447	0	0	9.58904e-05
	511	3	45	110.025	0.768773	0.761104	1	0	0.000138825	0	0	0		0.0582343	511	0		110.025	0	0	0.000100457
	512	3	46	110.547	0.819667	0.81149	1	0	0.000170376	0	0	0		0.0582343	512	0		110.547	0	0	0.000123288
	513	3	47	110.378	0.87832	0.869559	1	0	0.000157755	0	0	0		0.0582343	513	0		110.378	0	0	0.000114155
	514	3	48	110.244	0.922417	0.913216	1	0	7.57226e-05	0	0	0		0.0582343	514	0		110.244	0	0	5.47945e-05
	515	3	49	110.88	0.980643	0.970861	1	0	8.8343e-05	0	0	0		0.0582343	515	0		110.88	0	0	6.39269e-05
	516	3	50	118.816	0	0	4070	118.816	0.000252409	1	0	0		0.0582343	516	0		0	118.816	0	0.000182648
	517	3	51	117.125	0.0209362	0.0207273	3936	113.564	0.00029658	1	0	2.03835e-07		0.0582343	517	0		3.56096	113.564	-4.44089e-16	0.000214612
	518	3	52	116.764	0.090375	0.0894735	3550	101.392	0.000100963	1	0	2.99537e-07		0.0582343	518	0		15.3715	101.392	-5.32907e-15	7.30594e-05
	519	3	53	116.425	0.135152	0.133803	3255	93.4372	0.000208237	1	0	9.23884e-07		0.0582343	519	0		22.9874	93.4372	-3.55271e-15	0.000150685
	520	3	54	116.405	0.183828	0.181994	2968	85.1383	0.000182996	1	0	1.10431e-06		0.0582343	520	0		31.2666	85.1383	3.55271e-15	0.00013242
	521	3	55	117.346	0.240125	0.23773	2695	76.5036	0.000151445	1	0	1.1938e-06		0.0582343	521	0		40.842	76.5036	0	0.000109589
	522	3	56	117.873	0.2916	0.288691	2387	68.2754	0.000252409	1	0	2.41618e-06		0.0582343	522	0		49.5972	68.2754	7.10543e-15	0.000182648
	523	3	57	117.516	0.343423	0.339997	2097	59.1041	0.000328131	1	0	3.69926e-06		0.0582343	523	0		58.4116	59.1041	0	0.000237443
	524	3	58	116.704	0.39795	0.39398	1766	49.018	0.000252409	1	0	3.2974e-06		0.0582343	524	0		67.6858	49.018	0	0.000182648
	525	3	59	117.607	0.453684	0.449159	1565	40.4419	0.000239788	1	0	3.57125e-06		0.0582343	525	0		77.1655	40.4419	0	0.000173516
	526	3	60	117.292	0.499838	0.494852	1384	32.2768	0.000233478	1	0	3.83101e-06		0.0582343	526	0		85.0156	32.2768	0	0.00016895
	527	3	61	117.694	0.55325	0.547731	1190	23.594	0.000201927	1	0	3.66736e-06		0.0582343	527	0		94.1002	23.594	0	0.000146119
	528	3	62	118.274	0.60769	0.601629	994	14.9143	0.000265029	1	0	5.28706e-06		0.0582343	528	0		103.36	14.9143	0	0.000191781
	529	3	63	118.248	0.66025	0.653664	818	5.9489	0.000176686	1	0	3.82956e-06		0.0582343	529	0		112.299	5.9489	0	0.000127854
	530	3	64	117.696	0.715436	0.708299	1	0	0.000246098	0	0	0		0.0582343	530	0		117.696	0	0	0.000178082
	531	3	65	116.683	0.76525	0.757617	1	0	0.000201927	0	0	0		0.0582343	531	0		116.683	0	0	0.000146119
	532	3	66	118.418	0.820378	0.812195	1	0	0.00028396	0	0	0		0.0582343	532	0		118.418	0	0	0.000205479
	533	3	67	117.778	0.874857	0.86613	1	0	0.000176686	0	0	0		0.0582343	533	0		117.778	0	0	0.000127854
	534	3	68	118.151	0.928135	0.918877	1	0	0.000233478	0	0	0		0.0582343	534	0		118.151	0	0	0.00016895
	535	3	69	117.277	0.980464	0.970684	1	0	0.000176686	0	0	0		0.0582343	535	0		117.277	0	0	0.000127854
	536	3	70	126.34	0	0	4254	126.34	0.00059947	1	0	0		0.0582343	536	0		0	126.34	0	0.00043379
	537	3	71	124.182	0.0251429	0.0248921	4122	119.906	8.8343e-05	1	0	7.29164e-08		0.0582343	537	0		4.27646	119.906	-3.55271e-15	6.39269e-05
	538	3	72	125.135	0.0906667	0.0897623	3767	109.714	1.89306e-05	1	0	5.63445e-08		0.0582343	538	0		15.4212	109.714	-1.77636e-15	1.36986e-05
	539	3	73	125.637	0.130727	0.129423	3624	103.402	6.94123e-05	1	0	2.9788e-07		0.0582343	539	0		22.2349	103.402	-7.10543e-15	5.02283e-05
	540	3	74	125.396	0.185417	0.183567	3269	93.8595	0.000151445	1	0	9.21813e-07		0.0582343	540	0		31.5368	93.8595	3.55271e-15	0.000109589
	541	3	75	126.125	0.23928	0.236893	2977	85.4272	0.000157755	1	0	1.23916e-06		0.0582343	541	0		40.6982	85.4272	0	0.000114155
	542	3	76	124.62	0.293667	0.290737	2629	74.671	0.000227168	1	0	2.18998e-06		0.0582343	542	0		49.9487	74.671	0	0.000164384
	543	3	77	126.205	0.342775	0.339356	2377	67.9033	0.000252409	1	0	2.84022e-06		0.0582343	543	0		58.3013	67.9033	0	0.000182648
	544	3	78	125.744	0.39875	0.394772	2063	57.9217	0.000201927	1	0	2.64322e-06		0.0582343	544	0		67.8219	57.9217	0	0.000146119
	545	3	79	125.514	0.450077	0.445587	1765	48.962	0.000164066	1	0	2.42406e-06		0.0582343	545	0		76.5519	48.962	0	0.000118721
	546	3	80	126.28	0.50075	0.495755	1582	41.1093	0.000227168	1	0	3.73427e-06		0.0582343	546	0		85.1707	41.1093	0	0.000164384
	547	3	81	126.137	0.553447	0.547927	1374	32.0036	0.000239788	1	0	4.35655e-06		0.0582343	547	0		94.1338	32.0036	0	0.000173516
	548	3	82	125.777	0.610903	0.604809	1149	21.8707	0.000195617	1	0	3.92299e-06		0.0582343	548	0		103.906	21.8707	0	0.000141553
	549	3	83	125.425	0.659683	0.653103	959	13.222	0.000258719	1	0	5.60276e-06		0.0582343	549	0		112.203	13.222	0	0.000187215
	550	3	84	126.231	0.710953	0.703862	803	5.30752	0.000271339	1	0	6.33275e-06		0.0582343	550	0		120.923	5.30752	0	0.000196347
	551	3	85	125.541	0.768714	0.761046	1	0	0.000176686	0	0	0		0.0582343	551	0		125.541	0	0	0.000127854
	552	3	86	125.729	0.816913	0.808764	1	0	0.000145135	0	0	0		0.0582343	552	0		125.729	0	0	0.000105023
	553	3	87	126.192	0.871	0.862312	1	0	0.000113584	0	0	0		0.0582343	553	0		126.192	0	0	8.21918e-05
	554	3	88	125.103	0.926333	0.917093	1	0	0.000189306	0	0	0		0.0582343	554	0		125.103	0	0	0.000136986
	555	3	89	125.75	0.9791	0.969333	1	0	0.000126204	0	0	0		0.0582343	555	0		125.75	0	0	9.13242e-05
	556	3	90	134.327	0	0	4479	134.327	0.00113584	1	0	0		0.0582343	556	0		0	134.327	0	0.000821918
	557	3	91	136.75	0.0153438	0.0151907	4460	134.14	0.000201927	1	0	1.0171e-07		0.0582343	557	0		2.60976	134.14	1.33227e-15	0.000146119
	558	3	92	136.469	0.0724118	0.0716895	4228	124.153	0.000107274	1	0	2.55e-07		0.0582343	558	0		12.3162	124.153	5.32907e-15	7.76256e-05
	559	3	93	134.546	0.135733	0.134379	3851	111.46	9.46532e-05	1	0	4.21755e-07		0.0582343	559	0		23.0864	111.46	-3.55271e-15	6.84932e-05
	560	3	94	135.385	0.189214	0.187327	3617	103.202	8.8343e-05	1	0	5.48737e-07		0.0582343	560	0		32.1828	103.202	7.10543e-15	6.39269e-05
	561	3	95	134.573	0.25	0.247506	3226	92.0511	9.46532e-05	1	0	7.76808e-07		0.0582343	561	0		42.5216	92.0511	0	6.84932e-05
	562	3	96	134.833	0.29132	0.288414	2974	85.2835	0.000157755	1	0	1.50867e-06		0.0582343	562	0		49.5495	85.2835	0	0.000114155
	563	3	97	134.181	0.345154	0.341711	2647	75.4747	0.000164066	1	0	1.85895e-06		0.0582343	563	0		58.7059	75.4747	0	0.000118721
	564	3	98	135.806	0.404889	0.40085	2335	66.9397	0.000113584	1	0	1.5097e-06		0.0582343	564	0		68.8661	66.9397	0	8.21918e-05
	565	3	99	134.166	0.447375	0.442912	2066	58.0734	0.000100963	1	0	1.48277e-06		0.0582343	565	0		76.0924	58.0734	0	7.30594e-05
	566	3	100	134.177	0.505611	0.500568	1738	48.1796	0.000113584	1	0	1.88526e-06		0.0582343	566	0		85.9975	48.1796	0	8.21918e-05
	567	3	101	134.205	0.555056	0.549519	1546	39.7981	0.000113584	1	0	2.06962e-06		0.0582343	567	0		94.4073	39.7981	0	8.21918e-05
	568	3	102	134.126	0.606406	0.600357	1350	30.9847	0.000201927	1	0	4.01972e-06		0.0582343	568	0		103.141	30.9847	0	0.000146119
	569	3	103	133.839	0.657083	0.650529	1153	22.078	0.000151445	1	0	3.26674e-06		0.0582343	569	0		111.761	22.078	0	0.000109589
	570	3	104	132.593	0.706895	0.699843	942	12.3601	0.000119894	1	0	2.78222e-06		0.0582343	570	0		120.233	12.3601	0	8.6758e-05
	571	3	105	134.937	0.769944	0.762264	779	3.97978	0.000113584	1	0	2.87088e-06		0.0582343	571	0		130.957	3.97978	0	8.21918e-05
	572	3	106	134.452	0.825083	0.816853	1	0	0.000151445	0	0	0		0.0582343	572	0		134.452	0	0	0.000109589
	573	3	107	133.689	0.8768	0.868054	1	0	6.31021e-05	0	0	0		0.0582343	573	0		133.689	0	0	4.56621e-05
	574	3	108	134.382	0.930111	0.920833	1	0	0.000113584	0	0	0		0.0582343	574	0		134.382	0	0	8.21918e-05
	575	3	109	134.432	0.9891	0.979234	1	0	6.31021e-05	0	0	0		0.0582343	575	0		134.432	0	0	4.56621e-05
	576	3	110	142.322	0	0	4723	142.322	0.00122418	1	0	0		0.0582343	576	0		0	142.322	0	0.000885845
	577	3	111	142.163	0.0132235	0.0130916	4687	139.914	0.00107274	1	0	4.65671e-07		0.0582343	577	0		2.24914	139.914	-1.77636e-15	0.000776256
	578	3	112	142.825	0.0753415	0.0745899	4360	130.01	0.000258719	1	0	6.39883e-07		0.0582343	578	0		12.8146	130.01	0	0.000187215
	579	3	113	143.775	0.133	0.131673	4174	121.154	0.000227168	1	0	9.91829e-07		0.0582343	579	0		22.6215	121.154	3.55271e-15	0.000164384
	580	3	114	142.756	0.18681	0.184946	3830	110.982	0.000132514	1	0	8.12645e-07		0.0582343	580	0		31.7737	110.982	7.10543e-15	9.58904e-05
	581	3	115	142.655	0.238765	0.236383	3573	102.044	0.000107274	1	0	8.40817e-07		0.0582343	581	0		40.6106	102.044	-7.10543e-15	7.76256e-05
	582	3	116	142.988	0.290258	0.287363	3261	93.6195	0.000195617	1	0	1.86393e-06		0.0582343	582	0		49.3689	93.6195	-7.10543e-15	0.000141553
	583	3	117	142.957	0.339292	0.335907	2972	85.2485	0.000151445	1	0	1.68681e-06		0.0582343	583	0		57.7089	85.2485	-7.10543e-15	0.000109589
	584	3	118	143.236	0.395444	0.3915	2657	75.9763	0.000170376	1	0	2.21173e-06		0.0582343	584	0		67.2597	75.9763	0	0.000123288
	585	3	119	143.03	0.447333	0.442871	2336	66.9445	0.000170376	1	0	2.50194e-06		0.0582343	585	0		76.0853	66.9445	0	0.000123288
	586	3	120	142.977	0.501176	0.496177	2059	57.7335	0.000107274	1	0	1.76491e-06		0.0582343	586	0		85.2432	57.7335	0	7.76256e-05
	587	3	121	141.839	0.557545	0.551984	1708	47.0079	6.94123e-05	1	0	1.27044e-06		0.0582343	587	0		94.8308	47.0079	0	5.02283e-05
	588	3	122	143.27	0.60575	0.599708	1557	40.2398	0.000100963	1	0	2.00769e-06		0.0582343	588	0		103.03	40.2398	0	7.30594e-05
	589	3	123	142.824	0.655647	0.649107	1357	31.307	0.000107274	1	0	2.30888e-06		0.0582343	589	0		111.517	31.307	0	7.76256e-05
	590	3	124	139.822	0.714889	0.707758	1078	18.2288	5.67919e-05	1	0	1.3328e-06		0.0582343	590	0		121.593	18.2288	0	4.10959e-05
	591	3	125	141.678	0.7718	0.764101	908	10.4058	3.15511e-05	1	0	7.99388e-07		0.0582343	591	0		131.273	10.4058	0	2.28311e-05
	592	3	126	142.728	0.8206	0.812415	768	3.15553	6.31021e-05	1	0	1.69986e-06		0.0582343	592	0		139.573	3.15553	0	4.56621e-05
	593	3	127	141.412	0.8685	0.859837	1	0	3.78613e-05	0	0	0		0.0582343	593	0		141.412	0	0	2.73973e-05
	594	3	128	143.456	0.938286	0.928926	1	0	4.41715e-05	0	0	0		0.0582343	594	0		143.456	0	0	3.19635e-05
	595	3	129	143.297	0.994	0.984085	1	0	3.15511e-05	0	0	0		0.0582343	595	0		143.297	0	0	2.28311e-05
	596	3	130	149.521	0	0	4907	149.521	0.000384923	1	0	0		0.0582343	596	0		0	149.521	0	0.000278539
	597	3	131	149.742	0.0256486	0.0253928	4786	145.38	0.000233478	1	0	1.96584e-07		0.0582343	597	0		4.36248	145.38	6.21725e-15	0.00016895
	598	3	132	150.706	0.0837358	0.0829006	4571	136.464	0.000334441	1	0	9.19327e-07		0.0582343	598	0		14.2423	136.464	1.77636e-15	0.000242009
	599	3	133	150.566	0.13393	0.132594	4295	127.786	0.000359682	1	0	1.58137e-06		0.0582343	599	0		22.7796	127.786	0	0.000260274
	600	3	134	150.954	0.1874	0.185531	4100	119.08	0.00028396	1	0	1.74689e-06		0.0582343	600	0		31.8742	119.08	-3.55271e-15	0.000205479
	601	3	135	151.609	0.2375	0.235131	3840	111.213	0.000201927	1	0	1.57433e-06		0.0582343	601	0		40.3955	111.213	0	0.000146119
	602	3	136	150.593	0.2935	0.290572	3533	100.672	0.000176686	1	0	1.70235e-06		0.0582343	602	0		49.9203	100.672	-7.10543e-15	0.000127854
	603	3	137	151.352	0.342488	0.339072	3243	93.0999	0.000271339	1	0	3.05068e-06		0.0582343	603	0		58.2526	93.0999	7.10543e-15	0.000196347
	604	3	138	150.26	0.396147	0.392195	2912	82.8811	0.000214547	1	0	2.79009e-06		0.0582343	604	0		67.3792	82.8811	0	0.000155251
	605	3	139	150.624	0.451	0.446501	2612	73.915	0.000220857	1	0	3.26985e-06		0.0582343	605	0		76.7089	73.915	0	0.000159817
	606	3	140	150.324	0.50384	0.498814	2278	64.6277	0.000157755	1	0	2.60925e-06		0.0582343	606	0		85.6963	64.6277	0	0.000114155
	607	3	141	149.989	0.551333	0.545834	2008	56.2152	3.78613e-05	1	0	6.85249e-07		0.0582343	607	0		93.7742	56.2152	0	2.73973e-05
	608	3	142	150.834	0.611308	0.60521	1704	46.8588	8.20328e-05	1	0	1.64621e-06		0.0582343	608	0		103.975	46.8588	0	5.93607e-05
	609	3	143	150.73	0.646333	0.639886	1575	40.7975	3.78613e-05	1	0	8.03323e-07		0.0582343	609	0		109.932	40.7975	0	2.73973e-05
	610	3	144	151.634	0.709667	0.702588	1348	30.9294	1.89306e-05	1	0	4.4102e-07		0.0582343	610	0		120.705	30.9294	0	1.36986e-05
	611	3	145	147.687	0.773	0.765289	1025	16.2103	6.31021e-06	1	0	1.60126e-07		0.0582343	611	0		131.477	16.2103	0	4.56621e-06
	612	3	146	151.495	0.819	0.81083	938	12.1945	3.15511e-05	1	0	8.48275e-07		0.0582343	612	0		139.301	12.1945	0	2.28311e-05
	613	3	147	149.936	0.87275	0.864044	739	1.49343	2.52409e-05	1	0	7.23157e-07		0.0582343	613	0		148.443	1.49343	0	1.82648e-05
	614	3	148	150.126	0.969	0.959334	1	0	1.26204e-05	0	0	0		0.0582343	614	0		150.126	0	0	9.13242e-06
	615	3	149	160.217	0	0	5137	160.217	0.000340752	1	0	0		0.0582343	615	0		0	160.217	0	0.000246575
	616	3	150	159.223	0.023	0.0227706	5014	155.311	4.41715e-05	1	0	3.3351e-08		0.0582343	616	0		3.91198	155.311	-1.33227e-14	3.19635e-05
	617	3	151	159.405	0.0758214	0.0750651	4831	146.508	0.000176686	1	0	4.39777e-07		0.0582343	617	0		12.8962	146.508	1.77636e-15	0.000127854
	618	3	152	159.512	0.129875	0.128579	4611	137.422	0.000151445	1	0	6.45683e-07		0.0582343	618	0		22.09	137.422	3.55271e-15	0.000109589
	619	3	153	159.325	0.183613	0.181781	4304	128.095	0.000195617	1	0	1.17909e-06		0.0582343	619	0		31.23	128.095	1.06581e-14	0.000141553
	620	3	154	158.13	0.239889	0.237496	4040	117.328	0.000227168	1	0	1.78894e-06		0.0582343	620	0		40.8018	117.328	0	0.000164384
	621	3	155	159.159	0.290781	0.287881	3766	109.701	0.000201927	1	0	1.92752e-06		0.0582343	621	0		49.4579	109.701	7.10543e-15	0.000146119
	622	3	156	157.824	0.346273	0.342819	3503	98.9281	0.000138825	1	0	1.57806e-06		0.0582343	622	0		58.8962	98.9281	-7.10543e-15	0.000100457
	623	3	157	157.778	0.401632	0.397625	3147	89.4655	0.000119894	1	0	1.58075e-06		0.0582343	623	0		68.312	89.4655	0	8.6758e-05
	624	3	158	157.376	0.4458	0.441353	2881	81.5514	0.000126204	1	0	1.84694e-06		0.0582343	624	0		75.8245	81.5514	0	9.13242e-05
	625	3	159	158.516	0.499	0.494022	2602	73.6434	6.31021e-05	1	0	1.03367e-06		0.0582343	625	0		84.8731	73.6434	0	4.56621e-05
	626	3	160	159.935	0.563333	0.557714	2263	64.1195	1.89306e-05	1	0	3.50082e-07		0.0582343	626	0		95.8153	64.1195	0	1.36986e-05
	627	3	161	158.375	0.612	0.605895	1913	54.282	1.89306e-05	1	0	3.80325e-07		0.0582343	627	0		104.093	54.282	0	1.36986e-05
	628	3	162	161.812	0.6575	0.650941	1792	49.9798	1.26204e-05	1	0	2.72401e-07		0.0582343	628	0		111.832	49.9798	0	9.13242e-06
	629	3	163	162.289	0.708	0.700938	1602	41.8677	6.31021e-06	1	0	1.46661e-07		0.0582343	629	0		120.421	41.8677	0	4.56621e-06
	630	3	164	157.881	0.7685	0.760834	1275	27.1692	1.26204e-05	1	0	3.18388e-07		0.0582343	630	0		130.711	27.1692	0	9.13242e-06
	631	3	165	159.099	0.8245	0.816276	1090	18.8632	1.26204e-05	1	0	3.41589e-07		0.0582343	631	0		140.236	18.8632	0	9.13242e-06
	632	3	166	167.701	0	0	5312	167.701	0.000643642	1	0	0		0.0582343	632	0		0	167.701	0	0.000465753
	633	3	167	168.938	0.0155641	0.0154089	5279	166.291	0.000246098	1	0	1.25739e-07		0.0582343	633	0		2.64724	166.291	-1.06581e-14	0.000178082
	634	3	168	168.498	0.07675	0.0759844	5028	155.443	0.000201927	1	0	5.08758e-07		0.0582343	634	0		13.0541	155.443	1.24345e-14	0.000146119
	635	3	169	167.979	0.129333	0.128043	4818	145.981	0.000170376	1	0	7.23364e-07		0.0582343	635	0		21.9978	145.981	-3.55271e-15	0.000123288
	636	3	170	166.873	0.185706	0.183853	4536	135.287	0.000214547	1	0	1.30794e-06		0.0582343	636	0		31.586	135.287	-3.55271e-15	0.000155251
	637	3	171	167.446	0.235059	0.232714	4288	127.465	0.000107274	1	0	8.27767e-07		0.0582343	637	0		39.9803	127.465	0	7.76256e-05
	638	3	172	167.294	0.290167	0.287272	4054	117.941	0.000151445	1	0	1.44258e-06		0.0582343	638	0		49.3534	117.941	7.10543e-15	0.000109589
	639	3	173	168.018	0.337545	0.334178	3789	110.606	6.94123e-05	1	0	7.69144e-07		0.0582343	639	0		57.4119	110.606	7.10543e-15	5.02283e-05
	640	3	174	165.211	0.390857	0.386958	3473	98.732	4.41715e-05	1	0	5.66759e-07		0.0582343	640	0		66.4794	98.732	0	3.19635e-05
	641	3	175	169.271	0.438	0.433631	3306	94.7731	1.26204e-05	1	0	1.81462e-07		0.0582343	641	0		74.4978	94.7731	0	9.13242e-06
	642	3	176	168.095	0.502333	0.497323	2909	82.6549	5.67919e-05	1	0	9.3652e-07		0.0582343	642	0		85.44	82.6549	0	4.10959e-05
	643	3	177	167.408	0.572	0.566294	2467	70.1182	3.15511e-05	1	0	5.92446e-07		0.0582343	643	0		97.2894	70.1182	0	2.28311e-05
	644	3	178	168.09	0.616	0.609855	2237	63.3166	1.26204e-05	1	0	2.55207e-07		0.0582343	644	0		104.773	63.3166	0	9.13242e-06
	645	3	179	164.989	0.642	0.635596	1995	55.7933	6.31021e-06	1	0	1.3299e-07		0.0582343	645	0		109.195	55.7933	0	4.56621e-06
	646	3	180	175.732	0	0	5451	175.732	0.00112953	1	0	0		0.0582343	646	0		0	175.732	0	0.000817352
	647	3	181	175.992	0.0167	0.0165334	5420	173.151	0.00088343	1	0	4.84314e-07		0.0582343	647	0		2.84044	173.151	-4.44089e-16	0.000639269
	648	3	182	175.755	0.0768308	0.0760644	5184	162.687	0.000410164	1	0	1.0345e-06		0.0582343	648	0		13.0679	162.687	1.06581e-14	0.000296804
	649	3	183	177.01	0.1275	0.126228	5016	155.324	0.000151445	1	0	6.33876e-07		0.0582343	649	0		21.686	155.324	7.10543e-15	0.000109589
	650	3	184	175.128	0.188833	0.18695	4755	143.01	0.000113584	1	0	7.04099e-07		0.0582343	650	0		32.118	143.01	1.42109e-14	8.21918e-05
	651	3	185	176.078	0.243684	0.241253	4517	134.63	0.000119894	1	0	9.59099e-07		0.0582343	651	0		41.4473	134.63	-7.10543e-15	8.6758e-05
	652	3	186	175.807	0.292143	0.289229	4253	126.118	8.8343e-05	1	0	8.47239e-07		0.0582343	652	0		49.6895	126.118	0	6.39269e-05
	653	3	187	175.31	0.3449	0.34146	4028	116.648	6.31021e-05	1	0	7.14456e-07		0.0582343	653	0		58.6628	116.648	7.10543e-15	4.56621e-05
	654	3	188	176.994	0.384333	0.3805	3857	111.624	3.78613e-05	1	0	4.77685e-07		0.0582343	654	0		65.3698	111.624	0	2.73973e-05
	655	3	189	175.086	0.452	0.447491	3441	98.2074	1.26204e-05	1	0	1.87263e-07		0.0582343	655	0		76.879	98.2074	0	9.13242e-06
	656	3	190	175.616	0.5008	0.495805	3175	90.4368	3.15511e-05	1	0	5.18701e-07		0.0582343	656	0		85.1792	90.4368	0	2.28311e-05
	657	3	191	177.425	0.5524	0.54689	2919	83.4688	3.15511e-05	1	0	5.72145e-07		0.0582343	657	0		93.9557	83.4688	0	2.28311e-05
	658	3	192	174.325	0.612667	0.606555	2468	70.119	1.89306e-05	1	0	3.8074e-07		0.0582343	658	0		104.206	70.119	0	1.36986e-05
	659	3	193	174.32	0.638	0.631636	2313	65.8051	6.31021e-06	1	0	1.32161e-07		0.0582343	659	0		108.515	65.8051	0	4.56621e-06
	660	3	194	184.763	0	0	5598	184.763	0.00167852	1	0	0		0.0582343	660	0		0	184.763	0	0.00121461
	661	3	195	183.108	0.0169167	0.0167479	5528	180.23	0.00060578	1	0	3.3641e-07		0.0582343	661	0		2.87729	180.23	-2.66454e-15	0.000438356
	662	3	196	184.325	0.0775345	0.0767611	5362	171.138	0.000365992	1	0	9.31549e-07		0.0582343	662	0		13.1876	171.138	0	0.00026484
	663	3	197	184.26	0.1245	0.123258	5198	163.084	0.000214547	1	0	8.76861e-07		0.0582343	663	0		21.1757	163.084	-1.42109e-14	0.000155251
	664	3	198	184.898	0.183	0.181175	4982	153.772	0.000132514	1	0	7.96073e-07		0.0582343	664	0		31.1258	153.772	3.55271e-15	9.58904e-05
	665	3	199	183.541	0.238889	0.236506	4754	142.909	0.000113584	1	0	8.9074e-07		0.0582343	665	0		40.6317	142.909	-7.10543e-15	8.21918e-05
	666	3	200	183.235	0.2935	0.290572	4443	133.315	2.52409e-05	1	0	2.43193e-07		0.0582343	666	0		49.9203	133.315	-7.10543e-15	1.82648e-05
	667	3	201	184.653	0.318	0.314828	4385	130.565	6.31021e-06	1	0	6.58733e-08		0.0582343	667	0		54.0874	130.565	-7.10543e-15	4.56621e-06
	668	3	202	180.366	0.411	0.4069	3786	110.461	6.31021e-06	1	0	8.51382e-08		0.0582343	668	0		69.9055	110.461	0	4.56621e-06
	669	3	203	182.571	0.446667	0.442211	3728	106.599	1.89306e-05	1	0	2.7758e-07		0.0582343	669	0		75.9719	106.599	0	1.36986e-05
	670	3	204	183.114	0.505667	0.500623	3410	97.1067	1.89306e-05	1	0	3.14245e-07		0.0582343	670	0		86.007	97.1067	0	1.36986e-05
	671	3	205	183.726	0.56	0.554414	3096	88.4776	6.31021e-06	1	0	1.16003e-07		0.0582343	671	0		95.2483	88.4776	0	4.56621e-06
	672	3	206	192.03	0	0	5661	192.03	0.00147659	1	0	0		0.0582343	672	0		0	192.03	0	0.00106849
	673	3	207	193.951	0.00839583	0.00831208	5695	192.523	0.00030289	1	0	8.3481e-08		0.0582343	673	0		1.42802	192.523	-1.19904e-14	0.000219178
	674	3	208	193.238	0.0707333	0.0700278	5553	181.207	9.46532e-05	1	0	2.19785e-07		0.0582343	674	0		12.0308	181.207	1.06581e-14	6.84932e-05
	675	3	209	193.857	0.132	0.130683	5371	171.406	7.57226e-05	1	0	3.28124e-07		0.0582343	675	0		22.4514	171.406	7.10543e-15	5.47945e-05
	676	3	210	194.57	0.183667	0.181835	5208	163.331	3.78613e-05	1	0	2.28278e-07		0.0582343	676	0		31.2392	163.331	1.06581e-14	2.73973e-05
	677	3	211	192.258	0.226	0.223746	4983	153.818	1.26204e-05	1	0	9.36313e-08		0.0582343	677	0		38.4395	153.818	-7.10543e-15	9.13242e-06
	678	3	212	192.907	0.27	0.267307	4850	146.983	6.31021e-06	1	0	5.59302e-08		0.0582343	678	0		45.9233	146.983	7.10543e-15	4.56621e-06
	679	3	213	190.791	0.456	0.451451	3919	113.232	6.31021e-06	1	0	9.44599e-08		0.0582343	679	0		77.5594	113.232	0	4.56621e-06
	680	3	214	200.029	0	0	5751	200.029	0.000675193	1	0	0		0.0582343	680	0		0	200.029	0	0.000488584
	681	3	215	199.731	0.0035	0.00346509	5728	199.136	0.00029027	1	0	3.3351e-08		0.0582343	681	0		0.595302	199.136	7.77156e-16	0.000210046
	682	3	216	201.421	0.0872222	0.0863522	5628	186.586	5.67919e-05	1	0	1.62612e-07		0.0582343	682	0		14.8353	186.586	1.42109e-14	4.10959e-05
	683	3	217	200.136	0.1361	0.134742	5485	176.988	6.31021e-05	1	0	2.8193e-07		0.0582343	683	0		23.1487	176.988	-3.55271e-15	4.56621e-05
	684	3	218	201.582	0.185364	0.183515	5351	170.055	6.94123e-05	1	0	4.22377e-07		0.0582343	684	0		31.5278	170.055	-1.42109e-14	5.02283e-05
	685	3	219	201.223	0.234	0.231666	5170	161.423	2.52409e-05	1	0	1.93891e-07		0.0582343	685	0		39.8002	161.423	0	1.82648e-05
	686	3	220	202.555	0.29	0.287107	4973	153.23	3.15511e-05	1	0	3.00366e-07		0.0582343	686	0		49.325	153.23	-7.10543e-15	2.28311e-05
	687	3	221	201.901	0.321	0.317798	4862	147.303	3.15511e-05	1	0	3.32474e-07		0.0582343	687	0		54.5977	147.303	-7.10543e-15	2.28311e-05
	688	3	222	199.576	0.383667	0.37984	4478	134.319	1.89306e-05	1	0	2.38428e-07		0.0582343	688	0		65.2564	134.319	0	1.36986e-05
	689	3	223	202.003	0.437	0.432641	4293	127.675	1.89306e-05	1	0	2.71572e-07		0.0582343	689	0		74.3277	127.675	0	1.36986e-05
	690	3	224	207.453	0	0	5776	207.453	5.67919e-05	1	0	0		0.0582343	690	0		0	207.453	0	4.10959e-05
	691	3	225	209.305	0.00366667	0.00363009	5803	208.682	1.89306e-05	1	0	2.27864e-09		0.0582343	691	0		0.62365	208.682	-1.24345e-14	1.36986e-05
	692	3	226	207.563	0.095	0.0940524	5653	191.404	1.89306e-05	1	0	5.90374e-08		0.0582343	692	0		16.1582	191.404	-1.42109e-14	1.36986e-05
	693	3	227	206.112	0.138667	0.137283	5578	182.527	1.89306e-05	1	0	8.61739e-08		0.0582343	693	0		23.5853	182.527	7.10543e-15	1.36986e-05
	694	3	228	207.944	0.186	0.184145	5478	176.308	1.26204e-05	1	0	7.70594e-08		0.0582343	694	0		31.6361	176.308	-1.06581e-14	9.13242e-06
	695	3	229	207.708	0.245125	0.24268	5273	166.015	5.04817e-05	1	0	4.06219e-07		0.0582343	695	0		41.6924	166.015	7.10543e-15	3.65297e-05
	696	3	230	207.202	0.288875	0.285993	5126	158.069	5.04817e-05	1	0	4.78721e-07		0.0582343	696	0		49.1337	158.069	-7.10543e-15	3.65297e-05
	697	3	231	207.379	0.34675	0.343291	4894	148.401	5.04817e-05	1	0	5.74631e-07		0.0582343	697	0		58.9774	148.401	-7.10543e-15	3.65297e-05
	698	3	232	206.165	0.4135	0.409375	4552	135.835	1.26204e-05	1	0	1.71312e-07		0.0582343	698	0		70.3307	135.835	0	9.13242e-06
	699	3	233	205.187	0.4375	0.433136	4394	130.774	1.26204e-05	1	0	1.81255e-07		0.0582343	699	0		74.4128	130.774	1.42109e-14	9.13242e-06
	700	4	1	55.303	0	0	1953	55.303	6.08936e-06	1	0	0		0.0582343	700	0		0	55.303	0	4.56621e-06
	701	4	2	60.634	0	0	2133	60.634	0.00506025	1	0	0		0.0582343	701	0		0	60.634	0	0.00379452
	702	4	3	67.2351	0	0	2340	67.2351	0.00479841	1	0	0		0.0582343	702	0		0	67.2351	0	0.00359817
	703	4	4	69.6784	0.001	0.000985075	2426	69.5092	6.08936e-06	1	0	1.98899e-10		0.0582343	703	0		0.169236	69.5092	3.05311e-15	4.56621e-06
	704	4	5	76.2057	0	0	2665	76.2057	0.00336132	1	0	0		0.0582343	704	0		0	76.2057	0	0.00252055
	705	4	6	76.8501	0.001	0.000985075	2705	76.6809	4.87148e-05	1	0	1.59119e-09		0.0582343	705	0		0.169236	76.6809	3.05311e-15	3.65297e-05
	706	4	7	84.2604	0	0	2928	84.2604	0.00162586	1	0	0		0.0582343	706	0		0	84.2604	0	0.00121918
	707	4	8	91.784	0	0	3198	91.784	0.000627204	1	0	0		0.0582343	707	0		0	91.784	0	0.00047032
	708	4	9	96.5462	0.247	0.243313	1930	54.7449	6.08936e-06	1	0	4.91281e-08		0.0582343	708	0		41.8013	54.7449	0	4.56621e-06
	709	4	10	96.818	0.272	0.26794	1817	50.7859	6.08936e-06	1	0	5.41006e-08		0.0582343	709	0		46.0322	50.7859	0	4.56621e-06
	710	4	11	98.8291	0	0	3477	98.8291	2.43574e-05	1	0	0		0.0582343	710	0		0	98.8291	0	1.82648e-05
	711	4	12	104.212	0.036	0.0354627	3436	98.1191	1.82681e-05	1	0	2.14811e-08		0.0582343	711	0		6.09249	98.1191	-3.55271e-15	1.36986e-05
	712	4	13	102.506	0.08652	0.0852287	3061	87.8634	0.000152234	1	0	4.30219e-07		0.0583054	712	7.11735e-05		14.6423	87.8634	3.55271e-15	0.000114155
	713	4	14	103.171	0.134844	0.132831	2845	80.3507	0.000194859	1	0	8.5825e-07		0.0583976	713	9.22136e-05		22.8204	80.3507	-3.55271e-15	0.000146119
	714	4	15	102.046	0.184958	0.182198	2491	70.7444	0.000146145	1	0	8.82913e-07		0.0584265	714	2.88167e-05		31.3016	70.7444	0	0.000109589
	715	4	16	102.431	0.2419	0.23829	2181	61.4933	0.000121787	1	0	9.62274e-07		0.0586182	715	0.000191778		40.9382	61.4933	0	9.13242e-05
	716	4	17	102.705	0.289714	0.28539	1894	53.6747	8.5251e-05	1	0	8.06735e-07		0.0586457	716	2.74752e-05		49.03	53.6747	0	6.39269e-05
	717	4	18	101.823	0.336357	0.331337	1662	44.8991	8.5251e-05	1	0	9.36616e-07		0.0587062	717	6.05152e-05		56.9237	44.8991	0	6.39269e-05
	718	4	19	101.584	0.402625	0.396616	1417	33.4459	9.74297e-05	1	0	1.28131e-06		0.0587235	718	1.72178e-05		68.1386	33.4459	0	7.30594e-05
	719	4	20	102.953	0.44596	0.439304	1280	27.4808	0.000152234	1	0	2.21753e-06		0.0587299	719	6.41347e-06		75.4724	27.4808	0	0.000114155
	720	4	21	102.19	0.49195	0.484608	1091	18.9342	0.000121787	1	0	1.95697e-06		0.0588398	720	0.000109901		83.2556	18.9342	0	9.13242e-05
	721	4	22	102.203	0.552833	0.544582	875	8.64335	7.30723e-05	1	0	1.3195e-06		0.0588681	721	2.83528e-05		93.5592	8.64335	0	5.47945e-05
	722	4	23	103.835	0.617	0.607791	1	0	3.04468e-05	0	0	0		0.0589929	722	0.000124752		103.835	0	0	2.28311e-05
	723	4	24	102.801	0.6566	0.6468	1	0	3.04468e-05	0	0	0		0.059013	723	2.01717e-05		102.801	0	0	2.28311e-05
	724	4	25	103.461	0.713667	0.703015	1	0	1.82681e-05	0	0	0		0.0591413	724	0.000128218		103.461	0	0	1.36986e-05
	725	4	26	102.228	0.755667	0.744388	1	0	5.48042e-05	0	0	0		0.0592099	725	6.86824e-05		102.228	0	0	4.10959e-05
	726	4	27	102.221	0.813667	0.801523	1	0	1.82681e-05	0	0	0		0.0592361	726	2.61563e-05		102.221	0	0	1.36986e-05
	727	4	28	101.688	0.925	0.911194	1	0	6.08936e-06	0	0	0		0.0592527	727	1.66152e-05		101.688	0	0	4.56621e-06
	728	4	29	102.947	0.981	0.966358	1	0	1.21787e-05	0	0	0		0.0594378	728	0.000185066		102.947	0	0	9.13242e-06
	729	4	30	110.646	0	0	3791	110.646	0.000261842	1	0	0		0.0594643	729	2.65136e-05		0	110.646	0	0.000196347
	730	4	31	109.769	0.0178551	0.0175886	3732	106.747	0.000420166	1	0	2.45044e-07		0.0594917	730	2.73605e-05		3.02172	106.747	6.66134e-15	0.000315068
	731	4	32	109.082	0.0840333	0.0827791	3312	94.8606	0.000365361	1	0	1.00285e-06		0.0595977	731	0.000106054		14.2215	94.8606	0	0.000273973
	732	4	33	109.423	0.128574	0.126655	3050	87.6636	0.000328825	1	0	1.38096e-06		0.0596039	732	6.189e-06		21.7593	87.6636	0	0.000246575
	733	4	34	108.741	0.183067	0.180334	2758	77.7598	0.000274021	1	0	1.63853e-06		0.0597243	733	0.000120386		30.9814	77.7598	0	0.000205479
	734	4	35	108.805	0.237548	0.234003	2397	68.6029	0.00018877	1	0	1.46469e-06		0.059848	734	0.00012373		40.2017	68.6029	0	0.000141553
	735	4	36	109.298	0.295351	0.290943	2101	59.3141	0.000225306	1	0	2.17357e-06		0.059864	735	1.60337e-05		49.984	59.3141	0	0.00016895
	736	4	37	109.847	0.342787	0.337671	1844	51.835	0.0002862	1	0	3.20446e-06		0.0599303	736	6.62785e-05		58.0119	51.835	0	0.000214612
	737	4	38	109.33	0.399018	0.393062	1600	41.8017	0.000341004	1	0	4.4444e-06		0.0601089	737	0.000178589		67.5281	41.8017	0	0.000255708
	738	4	39	110.062	0.45425	0.44747	1410	33.1867	0.000365361	1	0	5.421e-06		0.0601353	738	2.64028e-05		76.8754	33.1867	0	0.000273973
	739	4	40	109.772	0.49622	0.488813	1243	25.7943	0.000249664	1	0	4.0466e-06		0.0601606	739	2.52409e-05		83.9781	25.7943	0	0.000187215
	740	4	41	110.381	0.552314	0.544071	1043	16.9096	0.000213127	1	0	3.84492e-06		0.0602767	740	0.000116172		93.4714	16.9096	0	0.000159817
	741	4	42	109.353	0.608087	0.599011	825	6.44306	0.000140055	1	0	2.7818e-06		0.0603023	741	2.55856e-05		102.91	6.44306	0	0.000105023
	742	4	43	110.156	0.6545	0.644732	1	0	0.000133966	0	0	0		0.0604047	742	0.000102342		110.156	0	0	0.000100457
	743	4	44	109.447	0.717048	0.706346	1	0	0.000127876	0	0	0		0.0604724	743	6.77625e-05		109.447	0	0	9.58904e-05
	744	4	45	110.025	0.768773	0.757299	1	0	0.000133966	0	0	0		0.0604879	744	1.54725e-05		110.025	0	0	0.000100457
	745	4	46	110.547	0.819667	0.807433	1	0	0.000164413	0	0	0		0.0604939	745	5.97238e-06		110.547	0	0	0.000123288
	746	4	47	110.378	0.87832	0.865211	1	0	0.000152234	0	0	0		0.0606133	746	0.000119399		110.378	0	0	0.000114155
	747	4	48	110.244	0.922417	0.908649	1	0	7.30723e-05	0	0	0		0.0607856	747	0.000172338		110.244	0	0	5.47945e-05
	748	4	49	110.88	0.980643	0.966007	1	0	8.5251e-05	0	0	0		0.0608111	748	2.54787e-05		110.88	0	0	6.39269e-05
	749	4	50	118.816	0	0	4070	118.816	0.000243574	1	0	0		0.0609232	749	0.000112106		0	118.816	0	0.000182648
	750	4	51	117.125	0.0209362	0.0206237	3939	113.582	0.0002862	1	0	1.95717e-07		0.0609475	750	2.43574e-05		3.54315	113.582	0	0.000214612
	751	4	52	116.764	0.090375	0.0890261	3552	101.469	9.74297e-05	1	0	2.87608e-07		0.0609625	751	1.4931e-05		15.2947	101.469	-5.32907e-15	7.30594e-05
	752	4	53	116.425	0.135152	0.133134	3259	93.5521	0.000200949	1	0	8.8709e-07		0.0610612	752	9.87604e-05		22.8725	93.5521	7.10543e-15	0.000150685
	753	4	54	116.405	0.183828	0.181084	2975	85.2947	0.000176591	1	0	1.06033e-06		0.0610859	753	2.46901e-05		31.1102	85.2947	3.55271e-15	0.00013242
	754	4	55	117.346	0.240125	0.236541	2728	76.7078	0.000146145	1	0	1.14626e-06		0.0612011	754	0.000115221		40.6378	76.7078	0	0.000109589
	755	4	56	117.873	0.2916	0.287248	2396	68.5234	0.000243574	1	0	2.31996e-06		0.0612665	755	6.53908e-05		49.3492	68.5234	0	0.000182648
	756	4	57	117.516	0.343423	0.338297	2103	59.3962	0.000316646	1	0	3.55194e-06		0.0612911	756	2.4587e-05		58.1195	59.3962	0	0.000237443
	757	4	58	116.704	0.39795	0.392011	1776	49.3564	0.000243574	1	0	3.16608e-06		0.0612969	757	5.76335e-06		67.3474	49.3564	0	0.000182648
	758	4	59	117.607	0.453684	0.446913	1578	40.8278	0.000231396	1	0	3.42902e-06		0.0614632	758	0.000166306		76.7796	40.8278	0	0.000173516
	759	4	60	117.292	0.499838	0.492378	1394	32.7019	0.000225306	1	0	3.67844e-06		0.0615852	759	0.000121972		84.5905	32.7019	0	0.00016895
	760	4	61	117.694	0.55325	0.544993	1200	24.0645	0.000194859	1	0	3.52131e-06		0.0616934	760	0.000108183		93.6297	24.0645	0	0.000146119
	761	4	62	118.274	0.60769	0.598621	1006	15.4311	0.000255753	1	0	5.0765e-06		0.0617078	761	1.44084e-05		102.843	15.4311	0	0.000191781
	762	4	63	118.248	0.66025	0.650396	828	6.51039	0.000170502	1	0	3.67705e-06		0.0618031	762	9.53038e-05		111.738	6.51039	0	0.000127854
	763	4	64	117.696	0.715436	0.704758	1	0	0.000237485	0	0	0		0.0618266	763	2.35049e-05		117.696	0	0	0.000178082
	764	4	65	116.683	0.76525	0.753829	1	0	0.000194859	0	0	0		0.0618504	764	2.3826e-05		116.683	0	0	0.000146119
	765	4	66	118.418	0.820378	0.808134	1	0	0.000274021	0	0	0		0.0618741	765	2.37264e-05		118.418	0	0	0.000205479
	766	4	67	117.778	0.874857	0.8618	1	0	0.000170502	0	0	0		0.0619853	766	0.000111188		117.778	0	0	0.000127854
	767	4	68	118.151	0.928135	0.914283	1	0	0.000225306	0	0	0		0.0621458	767	0.000160486		118.151	0	0	0.00016895
	768	4	69	117.277	0.980464	0.965831	1	0	0.000170502	0	0	0		0.0622089	768	6.31021e-05		117.277	0	0	0.000127854
	769	4	70	126.34	0	0	4254	126.34	0.000578489	1	0	0		0.0623133	769	0.000104396		0	126.34	0	0.00043379
	770	4	71	124.182	0.0251429	0.0247676	4124	119.927	8.5251e-05	1	0	7.00125e-08		0.062431	770	0.000117703		4.25507	119.927	4.44089e-15	6.39269e-05
	771	4	72	125.135	0.0906667	0.0893135	3769	109.791	1.82681e-05	1	0	5.41006e-08		0.0624539	771	2.2896e-05		15.3441	109.791	5.32907e-15	1.36986e-05
	772	4	73	125.637	0.130727	0.128776	3628	103.513	6.69829e-05	1	0	2.86017e-07		0.0625459	772	9.19682e-05		22.1237	103.513	3.55271e-15	5.02283e-05
	773	4	74	125.396	0.185417	0.182649	3275	94.0172	0.000146145	1	0	8.85101e-07		0.0626532	773	0.000107296		31.3791	94.0172	0	0.000109589
	774	4	75	126.125	0.23928	0.235709	2985	85.6306	0.000152234	1	0	1.18981e-06		0.062808	774	0.000154869		40.4948	85.6306	0	0.000114155
	775	4	76	124.62	0.293667	0.289284	2636	74.9207	0.000219217	1	0	2.10276e-06		0.062831	775	2.2992e-05		49.6989	74.9207	0	0.000164384
	776	4	77	126.205	0.342775	0.337659	2385	68.1948	0.000243574	1	0	2.72711e-06		0.0628537	776	2.26822e-05		58.0098	68.1948	7.10543e-15	0.000182648
	777	4	78	125.744	0.39875	0.392799	2072	58.2608	0.000194859	1	0	2.53795e-06		0.0629544	777	0.000100742		67.4828	58.2608	0	0.000146119
	778	4	79	125.514	0.450077	0.443359	1774	49.3448	0.000158323	1	0	2.32752e-06		0.0630153	778	6.08936e-05		76.1692	49.3448	0	0.000118721
	779	4	80	126.28	0.50075	0.493276	1595	41.5351	0.000219217	1	0	3.58556e-06		0.0631289	779	0.000113584		84.7449	41.5351	0	0.000164384
	780	4	81	126.137	0.553447	0.545187	1389	32.4742	0.000231396	1	0	4.18305e-06		0.063151	780	2.20947e-05		93.6631	32.4742	0	0.000173516
	781	4	82	125.777	0.610903	0.601785	1161	22.3903	0.00018877	1	0	3.76675e-06		0.0634424	781	0.000291379		103.387	22.3903	0	0.000141553
	782	4	83	125.425	0.659683	0.649837	970	13.783	0.000249664	1	0	5.37963e-06		0.0635918	782	0.000149448		111.642	13.783	0	0.000187215
	783	4	84	126.231	0.710953	0.700342	814	5.91214	0.000261842	1	0	6.08055e-06		0.0636954	783	0.000103541		120.319	5.91214	0	0.000196347
	784	4	85	125.541	0.768714	0.757241	1	0	0.000170502	0	0	0		0.0637926	784	9.72165e-05		125.541	0	0	0.000127854
	785	4	86	125.729	0.816913	0.804721	1	0	0.000140055	0	0	0		0.0638813	785	8.87493e-05		125.729	0	0	0.000105023
	786	4	87	126.192	0.871	0.858	1	0	0.000109608	0	0	0		0.0639035	786	2.21873e-05		126.192	0	0	8.21918e-05
	787	4	88	125.103	0.926333	0.912508	1	0	0.000182681	0	0	0		0.0639254	787	2.18884e-05		125.103	0	0	0.000136986
	788	4	89	125.75	0.9791	0.964487	1	0	0.000121787	0	0	0		0.0639467	788	2.13213e-05		125.75	0	0	9.13242e-05
	789	4	90	134.327	0	0	4479	134.327	0.00109608	1	0	0		0.0640055	789	5.87623e-05		0	134.327	0	0.000821918
	790	4	91	136.75	0.0153438	0.0151147	4461	134.153	0.000194859	1	0	9.76595e-08		0.0641151	790	0.000109608		2.59671	134.153	4.44089e-15	0.000146119
	791	4	92	136.469	0.0724118	0.071331	4229	124.214	0.000103519	1	0	2.44845e-07		0.0643963	791	0.00028118		12.2547	124.214	-5.32907e-15	7.76256e-05
	792	4	93	134.546	0.135733	0.133707	3854	111.575	9.13403e-05	1	0	4.04959e-07		0.0644901	792	9.38139e-05		22.9709	111.575	7.10543e-15	6.84932e-05
	793	4	94	135.385	0.189214	0.18639	3623	103.363	8.5251e-05	1	0	5.26884e-07		0.0646798	793	0.000189735		32.0218	103.363	-7.10543e-15	6.39269e-05
	794	4	95	134.573	0.25	0.246269	3230	92.2637	9.13403e-05	1	0	7.45872e-07		0.0648241	794	0.000144218		42.309	92.2637	7.10543e-15	6.84932e-05
	795	4	96	134.833	0.29132	0.286972	2980	85.5312	0.000152234	1	0	1.44858e-06		0.064924	795	9.99169e-05		49.3018	85.5312	0	0.000114155
	796	4	97	134.181	0.345154	0.340002	2653	75.7682	0.000158323	1	0	1.78492e-06		0.0650798	796	0.000155854		58.4124	75.7682	-7.10543e-15	0.000118721
	797	4	98	135.806	0.404889	0.398846	2365	67.284	0.000109608	1	0	1.44958e-06		0.0651655	797	8.56431e-05		68.5217	67.284	0	8.21918e-05
	798	4	99	134.166	0.447375	0.440698	2076	58.4539	9.74297e-05	1	0	1.42372e-06		0.0651861	798	2.05751e-05		75.7119	58.4539	0	7.30594e-05
	799	4	100	134.177	0.505611	0.498065	1754	48.6096	0.000109608	1	0	1.81018e-06		0.0652075	799	2.14108e-05		85.5675	48.6096	0	8.21918e-05
	800	4	101	134.205	0.555056	0.546771	1561	40.2701	0.000109608	1	0	1.9872e-06		0.0652286	800	2.11223e-05		93.9353	40.2701	0	8.21918e-05
	801	4	102	134.126	0.606406	0.597356	1361	31.5004	0.000194859	1	0	3.85964e-06		0.0652853	801	5.67056e-05		102.626	31.5004	0	0.000146119
	802	4	103	133.839	0.657083	0.647276	1165	22.6368	0.000146145	1	0	3.13664e-06		0.0653911	802	0.000105772		111.202	22.6368	0	0.000109589
	803	4	104	132.593	0.706895	0.696344	955	12.9613	0.000115698	1	0	2.67141e-06		0.0656624	803	0.000271339		119.632	12.9613	0	8.6758e-05
	804	4	105	134.937	0.769944	0.758453	790	4.63457	0.000109608	1	0	2.75654e-06		0.0657529	804	9.05304e-05		130.302	4.63457	0	8.21918e-05
	805	4	106	134.452	0.825083	0.812769	1	0	0.000146145	0	0	0		0.065936	805	0.000183094		134.452	0	0	0.000109589
	806	4	107	133.689	0.8768	0.863714	1	0	6.08936e-05	0	0	0		0.0660752	806	0.00013917		133.689	0	0	4.56621e-05
	807	4	108	134.382	0.930111	0.916229	1	0	0.000109608	0	0	0		0.0662256	807	0.000150399		134.382	0	0	8.21918e-05
	808	4	109	134.432	0.9891	0.974338	1	0	6.08936e-05	0	0	0		0.066322	808	9.64198e-05		134.432	0	0	4.56621e-05
	809	4	110	142.322	0	0	4723	142.322	0.00118133	1	0	0		0.0663419	809	1.9855e-05		0	142.322	0	0.000885845
	810	4	111	142.163	0.0132235	0.0130262	4688	139.925	0.00103519	1	0	4.47125e-07		0.0664245	810	8.26456e-05		2.2379	139.925	7.99361e-15	0.000776256
	811	4	112	142.825	0.0753415	0.074217	4365	130.074	0.000249664	1	0	6.144e-07		0.0664452	811	2.06614e-05		12.7505	130.074	-1.42109e-14	0.000187215
	812	4	113	143.775	0.133	0.131015	4178	121.267	0.000219217	1	0	9.52329e-07		0.0665325	812	8.73618e-05		22.5084	121.267	-3.55271e-15	0.000164384
	813	4	114	142.756	0.18681	0.184021	3835	111.141	0.000127876	1	0	7.80281e-07		0.0665529	813	2.0383e-05		31.6149	111.141	3.55271e-15	9.58904e-05
	814	4	115	142.655	0.238765	0.235201	3581	102.247	0.000103519	1	0	8.07332e-07		0.0668148	814	0.000261842		40.4076	102.247	0	7.76256e-05
	815	4	116	142.988	0.290258	0.285926	3270	93.8663	0.00018877	1	0	1.78969e-06		0.0669599	815	0.000145135		49.1221	93.8663	7.10543e-15	0.000141553
	816	4	117	142.957	0.339292	0.334228	2981	85.5371	0.000146145	1	0	1.61964e-06		0.0670146	816	5.47209e-05		57.4203	85.5371	0	0.000109589
	817	4	118	143.236	0.395444	0.389542	2692	76.3126	0.000164413	1	0	2.12365e-06		0.0671167	817	0.00010207		66.9234	76.3126	0	0.000123288
	818	4	119	143.03	0.447333	0.440657	2367	67.3249	0.000164413	1	0	2.4023e-06		0.0672934	818	0.000176686		75.7048	67.3249	0	0.000123288
	819	4	120	142.977	0.501176	0.493696	2071	58.1598	0.000103519	1	0	1.69462e-06		0.0674277	819	0.000134299		84.817	58.1598	0	7.76256e-05
	820	4	121	141.839	0.557545	0.549224	1721	47.4821	6.69829e-05	1	0	1.21985e-06		0.0674468	820	1.916e-05		94.3567	47.4821	0	5.02283e-05
	821	4	122	143.27	0.60575	0.596709	1571	40.7549	9.74297e-05	1	0	1.92773e-06		0.0675399	821	9.30451e-05		102.515	40.7549	0	7.30594e-05
	822	4	123	142.824	0.655647	0.645861	1371	31.8646	0.000103519	1	0	2.21693e-06		0.0676196	822	7.9753e-05		110.959	31.8646	0	7.76256e-05
	823	4	124	139.822	0.714889	0.704219	1089	18.8367	5.48042e-05	1	0	1.27972e-06		0.0677039	823	8.43042e-05		120.985	18.8367	0	4.10959e-05
	824	4	125	141.678	0.7718	0.760281	920	11.0621	3.04468e-05	1	0	7.67552e-07		0.0677239	824	1.99382e-05		130.616	11.0621	0	2.28311e-05
	825	4	126	142.728	0.8206	0.808352	778	3.8534	6.08936e-05	1	0	1.63217e-06		0.0678639	825	0.000140055		138.875	3.8534	0	4.56621e-05
	826	4	127	141.412	0.8685	0.855538	1	0	3.65361e-05	0	0	0		0.0678824	826	1.84894e-05		141.412	0	0	2.73973e-05
	827	4	128	143.456	0.938286	0.924282	1	0	4.26255e-05	0	0	0		0.068012	827	0.000129599		143.456	0	0	3.19635e-05
	828	4	129	143.297	0.994	0.979164	1	0	3.04468e-05	0	0	0		0.0681825	828	0.000170502		143.297	0	0	2.28311e-05
	829	4	130	149.521	0	0	4907	149.521	0.000371451	1	0	0		0.0684352	829	0.000252678		0	149.521	0	0.000278539
	830	4	131	149.742	0.0256486	0.0252658	4787	145.402	0.000225306	1	0	1.88755e-07		0.0685337	830	9.84976e-05		4.34067	145.402	3.55271e-15	0.00016895
	831	4	132	150.706	0.0837358	0.0824861	4575	136.535	0.000322736	1	0	8.82715e-07		0.0685865	831	5.28057e-05		14.1711	136.535	-1.77636e-15	0.000242009
	832	4	133	150.566	0.13393	0.131931	4298	127.9	0.000347093	1	0	1.5184e-06		0.0686062	832	1.96696e-05		22.6657	127.9	0	0.000260274
	833	4	134	150.954	0.1874	0.184603	4105	119.24	0.000274021	1	0	1.67732e-06		0.068696	833	8.97886e-05		31.7148	119.24	-3.55271e-15	0.000205479
	834	4	135	151.609	0.2375	0.233955	3849	111.415	0.000194859	1	0	1.51163e-06		0.0687729	834	7.69616e-05		40.1935	111.415	0	0.000146119
	835	4	136	150.593	0.2935	0.289119	3539	100.922	0.000170502	1	0	1.63455e-06		0.0688543	835	8.13535e-05		49.6707	100.922	7.10543e-15	0.000127854
	836	4	137	151.352	0.342488	0.337377	3254	93.3912	0.000261842	1	0	2.92919e-06		0.0689894	836	0.000135153		57.9613	93.3912	0	0.000196347
	837	4	138	150.26	0.396147	0.390235	2917	83.218	0.000207038	1	0	2.67897e-06		0.0690073	837	1.78423e-05		67.0423	83.218	0	0.000155251
	838	4	139	150.624	0.451	0.444269	2623	74.2986	0.000213127	1	0	3.13962e-06		0.0691323	838	0.000125063		76.3254	74.2986	0	0.000159817
	839	4	140	150.324	0.50384	0.49632	2294	65.0562	0.000152234	1	0	2.50533e-06		0.0692969	839	0.000164534		85.2678	65.0562	0	0.000114155
	840	4	141	149.989	0.551333	0.543105	2023	56.6841	3.65361e-05	1	0	6.57958e-07		0.0693161	840	1.92404e-05		93.3054	56.6841	0	2.73973e-05
	841	4	142	150.834	0.611308	0.602184	1718	47.3787	7.91616e-05	1	0	1.58065e-06		0.0695599	841	0.000243834		103.455	47.3787	0	5.93607e-05
	842	4	143	150.73	0.646333	0.636687	1591	41.3471	3.65361e-05	1	0	7.71331e-07		0.069655	842	9.50502e-05		109.383	41.3471	0	2.73973e-05
	843	4	144	151.634	0.709667	0.699075	1364	31.5329	1.82681e-05	1	0	4.23456e-07		0.0697363	843	8.1315e-05		120.101	31.5329	0	1.36986e-05
	844	4	145	147.687	0.773	0.761463	1042	16.8676	6.08936e-06	1	0	1.53749e-07		0.069823	844	8.6646e-05		130.819	16.8676	0	4.56621e-06
	845	4	146	151.495	0.819	0.806776	951	12.891	3.04468e-05	1	0	8.14492e-07		0.0698739	845	5.09575e-05		138.604	12.891	0	2.28311e-05
	846	4	147	149.936	0.87275	0.859724	750	2.23564	2.43574e-05	1	0	6.94357e-07		0.0698929	846	1.89812e-05		147.701	2.23564	0	1.82648e-05
	847	4	148	150.126	0.969	0.954538	1	0	1.21787e-05	0	0	0		0.0699714	847	7.85062e-05		150.126	0	0	9.13242e-06
	848	4	149	160.217	0	0	5137	160.217	0.000328825	1	0	0		0.0699886	848	1.72178e-05		0	160.217	0	0.000246575
	849	4	150	159.223	0.023	0.0226567	5018	155.331	4.26255e-05	1	0	3.20228e-08		0.070119	849	0.000130423		3.89242	155.331	-4.44089e-16	3.19635e-05
	850	4	151	159.405	0.0758214	0.0746898	4834	146.573	0.000170502	1	0	4.22263e-07		0.0701933	850	7.4268e-05		12.8317	146.573	-1.77636e-15	0.000127854
	851	4	152	159.512	0.129875	0.127937	4617	137.532	0.000146145	1	0	6.19969e-07		0.070314	851	0.000120685		21.9795	137.532	-7.10543e-15	0.000109589
	852	4	153	159.325	0.183613	0.180872	4307	128.251	0.00018877	1	0	1.13213e-06		0.0704728	852	0.000158776		31.0739	128.251	7.10543e-15	0.000141553
	853	4	154	158.13	0.239889	0.236309	4045	117.532	0.000219217	1	0	1.71769e-06		0.0705512	853	7.8469e-05		40.5978	117.532	7.10543e-15	0.000164384
	854	4	155	159.159	0.290781	0.286441	3772	109.949	0.000194859	1	0	1.85076e-06		0.0707865	854	0.0002353		49.2106	109.949	-7.10543e-15	0.000146119
	855	4	156	157.824	0.346273	0.341105	3509	99.2226	0.000133966	1	0	1.51521e-06		0.0708051	855	1.8567e-05		58.6018	99.2226	7.10543e-15	0.000100457
	856	4	157	157.778	0.401632	0.395637	3160	89.8071	0.000115698	1	0	1.5178e-06		0.0708887	856	8.36134e-05		67.9705	89.8071	0	8.6758e-05
	857	4	158	157.376	0.4458	0.439146	2892	81.9306	0.000121787	1	0	1.77339e-06		0.0709804	857	9.17235e-05		75.4453	81.9306	0	9.13242e-05
	858	4	159	158.516	0.499	0.491552	2615	74.0678	6.08936e-05	1	0	9.92507e-07		0.0710562	858	7.57584e-05		84.4487	74.0678	0	4.56621e-05
	859	4	160	159.935	0.563333	0.554926	2277	64.5985	1.82681e-05	1	0	3.3614e-07		0.0710728	859	1.66152e-05		95.3362	64.5985	0	1.36986e-05
	860	4	161	158.375	0.612	0.602866	1933	54.8025	1.82681e-05	1	0	3.65179e-07		0.071122	860	4.9174e-05		103.572	54.8025	0	1.36986e-05
	861	4	162	161.812	0.6575	0.647687	1809	50.539	1.21787e-05	1	0	2.61552e-07		0.0712478	861	0.000125858		111.273	50.539	0	9.13242e-06
	862	4	163	162.289	0.708	0.697433	1616	42.4698	6.08936e-06	1	0	1.40821e-07		0.0712662	862	1.83168e-05		119.819	42.4698	0	4.56621e-06
	863	4	164	157.881	0.7685	0.75703	1286	27.8228	1.21787e-05	1	0	3.05708e-07		0.0713378	863	7.16686e-05		130.058	27.8228	0	9.13242e-06
	864	4	165	159.099	0.8245	0.812194	1102	19.5644	1.21787e-05	1	0	3.27985e-07		0.0714543	864	0.000116461		139.535	19.5644	0	9.13242e-06
	865	4	166	167.701	0	0	5312	167.701	0.000621114	1	0	0		0.07153	865	7.57226e-05		0	167.701	0	0.000465753
	866	4	167	168.938	0.0155641	0.0153318	5280	166.304	0.000237485	1	0	1.20732e-07		0.0716832	866	0.000153219		2.634	166.304	5.32907e-15	0.000178082
	867	4	168	168.498	0.07675	0.0756045	5033	155.509	0.000194859	1	0	4.88496e-07		0.0719103	867	0.000227064		12.9889	155.509	8.88178e-15	0.000146119
	868	4	169	167.979	0.129333	0.127403	4821	146.091	0.000164413	1	0	6.94556e-07		0.0719263	868	1.60337e-05		21.8878	146.091	0	0.000123288
	869	4	170	166.873	0.185706	0.182934	4539	135.445	0.000207038	1	0	1.25585e-06		0.0719994	869	7.31069e-05		31.4281	135.445	3.55271e-15	0.000155251
	870	4	171	167.446	0.235059	0.231551	4291	127.665	0.000103519	1	0	7.94801e-07		0.0720801	870	8.06869e-05		39.7804	127.665	0	7.76256e-05
	871	4	172	167.294	0.290167	0.285836	4059	118.188	0.000146145	1	0	1.38513e-06		0.072098	871	1.79171e-05		49.1066	118.188	0	0.000109589
	872	4	173	168.018	0.337545	0.332508	3825	110.894	6.69829e-05	1	0	7.38513e-07		0.0722195	872	0.000121453		57.1248	110.894	0	5.02283e-05
	873	4	174	165.211	0.390857	0.385024	3506	99.0644	4.26255e-05	1	0	5.44188e-07		0.072308	873	8.85131e-05		66.147	99.0644	0	3.19635e-05
	874	4	175	169.271	0.438	0.431463	3329	95.1456	1.21787e-05	1	0	1.74236e-07		0.0723555	874	4.74529e-05		74.1253	95.1456	0	9.13242e-06
	875	4	176	168.095	0.502333	0.494836	2916	83.0821	5.48042e-05	1	0	8.99223e-07		0.0724285	875	7.30723e-05		85.0128	83.0821	0	4.10959e-05
	876	4	177	167.408	0.572	0.563463	2485	70.6046	3.04468e-05	1	0	5.68852e-07		0.0725409	876	0.000112385		96.8029	70.6046	0	2.28311e-05
	877	4	178	168.09	0.616	0.606806	2253	63.8405	1.21787e-05	1	0	2.45044e-07		0.0726888	877	0.000147856		104.249	63.8405	0	9.13242e-06
	878	4	179	164.989	0.642	0.632418	2013	56.3392	6.08936e-06	1	0	1.27693e-07		0.0727065	878	1.76757e-05		108.649	56.3392	0	4.56621e-06
	879	4	180	175.732	0	0	5451	175.732	0.00108999	1	0	0		0.0727756	879	6.91602e-05		0	175.732	0	0.000817352
	880	4	181	175.992	0.0167	0.0164508	5421	173.166	0.00085251	1	0	4.65026e-07		0.0729947	880	0.000219117		2.82624	173.166	-4.44089e-16	0.000639269
	881	4	182	175.755	0.0768308	0.0756841	5185	162.752	0.000395808	1	0	9.93302e-07		0.0730102	881	1.54725e-05		13.0025	162.752	-7.10543e-15	0.000296804
	882	4	183	177.01	0.1275	0.125597	5026	155.432	0.000146145	1	0	6.08631e-07		0.0730808	882	7.05482e-05		21.5776	155.432	3.55271e-15	0.000109589
	883	4	184	175.128	0.188833	0.186015	4757	143.171	0.000109608	1	0	6.76058e-07		0.073198	883	0.000117202		31.9574	143.171	-1.42109e-14	8.21918e-05
	884	4	185	176.078	0.243684	0.240047	4523	134.838	0.000115698	1	0	9.20903e-07		0.0732318	884	3.38812e-05		41.2401	134.838	-7.10543e-15	8.6758e-05
	885	4	186	175.807	0.292143	0.287783	4279	126.366	8.5251e-05	1	0	8.13498e-07		0.0733023	885	7.05147e-05		49.441	126.366	0	6.39269e-05
	886	4	187	175.31	0.3449	0.339752	4033	116.941	6.08936e-05	1	0	6.86003e-07		0.0733196	886	1.729e-05		58.3694	116.941	-7.10543e-15	4.56621e-05
	887	4	188	176.994	0.384333	0.378597	3869	111.951	3.65361e-05	1	0	4.58662e-07		0.0734051	887	8.54152e-05		65.043	111.951	0	2.73973e-05
	888	4	189	175.086	0.452	0.445254	3465	98.5918	1.21787e-05	1	0	1.79805e-07		0.0735477	888	0.000142681		76.4946	98.5918	0	9.13242e-06
	889	4	190	175.616	0.5008	0.493325	3184	90.8627	3.04468e-05	1	0	4.98044e-07		0.0735935	889	4.5792e-05		84.7533	90.8627	0	2.28311e-05
	890	4	191	177.425	0.5524	0.544155	2925	83.9386	3.04468e-05	1	0	5.4936e-07		0.0736085	890	1.4931e-05		93.4859	83.9386	0	2.28311e-05
	891	4	192	174.325	0.612667	0.603523	2488	70.6401	1.82681e-05	1	0	3.65577e-07		0.0736765	891	6.8079e-05		103.685	70.6401	0	1.36986e-05
	892	4	193	174.32	0.638	0.628478	2325	66.3477	6.08936e-06	1	0	1.26898e-07		0.0736936	892	1.70571e-05		107.972	66.3477	0	4.56621e-06
	893	4	194	184.763	0	0	5598	184.763	0.00161977	1	0	0		0.073905	893	0.000211448		0	184.763	0	0.00121461
	894	4	195	183.108	0.0169167	0.0166642	5529	180.245	0.000584578	1	0	3.23012e-07		0.0740181	894	0.0001131		2.86291	180.245	7.54952e-15	0.000438356
	895	4	196	184.325	0.0775345	0.0763773	5365	171.204	0.000353183	1	0	8.9445e-07		0.0740862	895	6.80467e-05		13.1216	171.204	-1.42109e-14	0.00026484
	896	4	197	184.26	0.1245	0.122642	5202	163.19	0.000207038	1	0	8.4194e-07		0.0741189	896	3.26954e-05		21.0699	163.19	3.55271e-15	0.000155251
	897	4	198	184.898	0.183	0.180269	4984	153.927	0.000127876	1	0	7.6437e-07		0.0742013	897	8.24256e-05		30.9702	153.927	1.06581e-14	9.58904e-05
	898	4	199	183.541	0.238889	0.235323	4756	143.113	0.000109608	1	0	8.55266e-07		0.074339	898	0.000137687		40.4286	143.113	-7.10543e-15	8.21918e-05
	899	4	200	183.235	0.2935	0.289119	4447	133.564	2.43574e-05	1	0	2.33508e-07		0.0743534	899	1.44084e-05		49.6707	133.564	7.10543e-15	1.82648e-05
	900	4	201	184.653	0.318	0.313254	4397	130.836	6.08936e-06	1	0	6.32499e-08		0.0744191	900	6.56962e-05		53.817	130.836	-1.42109e-14	4.56621e-06
	901	4	202	180.366	0.411	0.404866	3822	110.81	6.08936e-06	1	0	8.17476e-08		0.0744633	901	4.41893e-05		69.5559	110.81	0	4.56621e-06
	902	4	203	182.571	0.446667	0.44	3748	106.979	1.82681e-05	1	0	2.66525e-07		0.0745724	902	0.000109142		75.592	106.979	0	1.36986e-05
	903	4	204	183.114	0.505667	0.49812	3419	97.5368	1.82681e-05	1	0	3.0173e-07		0.0746381	903	6.56651e-05		85.5769	97.5368	0	1.36986e-05
	904	4	205	183.726	0.56	0.551642	3122	88.9539	6.08936e-06	1	0	1.11384e-07		0.0748421	904	0.000204047		94.7721	88.9539	0	4.56621e-06
	905	4	206	192.03	0	0	5661	192.03	0.00142491	1	0	0		0.0748586	905	1.64601e-05		0	192.03	0	0.00106849
	906	4	207	193.951	0.00839583	0.00827052	5696	192.53	0.000292289	1	0	8.01564e-08		0.0749915	906	0.000132868		1.42088	192.53	1.35447e-14	0.000219178
	907	4	208	193.238	0.0707333	0.0696776	5554	181.267	9.13403e-05	1	0	2.11032e-07		0.075071	907	7.95407e-05		11.9706	181.267	-7.10543e-15	6.84932e-05
	908	4	209	193.857	0.132	0.13003	5374	171.518	7.30723e-05	1	0	3.15056e-07		0.0751026	908	3.15511e-05		22.3391	171.518	7.10543e-15	5.47945e-05
	909	4	210	194.57	0.183667	0.180925	5213	163.487	3.65361e-05	1	0	2.19187e-07		0.075166	909	6.33968e-05		31.083	163.487	1.42109e-14	2.73973e-05
	910	4	211	192.258	0.226	0.222627	4986	154.01	1.21787e-05	1	0	8.99024e-08		0.0752713	910	0.000105322		38.2473	154.01	1.42109e-14	9.13242e-06
	911	4	212	192.907	0.27	0.26597	4859	147.213	6.08936e-06	1	0	5.37028e-08		0.0753346	911	6.33668e-05		45.6937	147.213	7.10543e-15	4.56621e-06
	912	4	213	190.791	0.456	0.449194	3942	113.62	6.08936e-06	1	0	9.0698e-08		0.0755316	912	0.000196906		77.1716	113.62	0	4.56621e-06
	913	4	214	200.029	0	0	5751	200.029	0.000651561	1	0	0		0.0755742	913	4.26427e-05		0	200.029	0	0.000488584
	914	4	215	199.731	0.0035	0.00344776	5729	199.139	0.00028011	1	0	3.20228e-08		0.0756081	914	3.38812e-05		0.592326	199.139	-1.08802e-14	0.000210046
	915	4	216	201.421	0.0872222	0.0859204	5629	186.66	5.48042e-05	1	0	1.56136e-07		0.075624	915	1.5884e-05		14.7611	186.66	-1.77636e-15	4.10959e-05
	916	4	217	200.136	0.1361	0.134069	5487	177.103	6.08936e-05	1	0	2.70702e-07		0.0757522	916	0.000128218		23.033	177.103	-3.55271e-15	4.56621e-05
	917	4	218	201.582	0.185364	0.182597	5353	170.212	6.69829e-05	1	0	4.05555e-07		0.0758133	917	6.1149e-05		31.3702	170.212	7.10543e-15	5.02283e-05
	918	4	219	201.223	0.234	0.230508	5171	161.622	2.43574e-05	1	0	1.8617e-07		0.075915	918	0.000101635		39.6012	161.622	7.10543e-15	1.82648e-05
	919	4	220	202.555	0.29	0.285672	4976	153.476	3.04468e-05	1	0	2.88404e-07		0.0759917	919	7.67568e-05		49.0784	153.476	7.10543e-15	2.28311e-05
	920	4	221	201.901	0.321	0.316209	4872	147.576	3.04468e-05	1	0	3.19233e-07		0.0760222	920	3.04468e-05		54.3247	147.576	-7.10543e-15	2.28311e-05
	921	4	222	199.576	0.383667	0.37794	4518	134.645	1.82681e-05	1	0	2.28933e-07		0.0761509	921	0.000128749		64.9302	134.645	0	1.36986e-05
	922	4	223	202.003	0.437	0.430478	4301	128.047	1.82681e-05	1	0	2.60757e-07		0.0763409	922	0.000190014		73.9561	128.047	0	1.36986e-05
	923	4	224	207.453	0	0	5776	207.453	5.48042e-05	1	0	0		0.0763821	923	4.11502e-05		0	207.453	0	4.10959e-05
	924	4	225	209.305	0.00366667	0.00361194	5804	208.685	1.82681e-05	1	0	2.18789e-09		0.0764411	924	5.90088e-05		0.620531	208.685	-2.88658e-15	1.36986e-05
	925	4	226	207.563	0.095	0.0935821	5654	191.485	1.82681e-05	1	0	5.66863e-08		0.0765648	925	0.00012373		16.0774	191.485	-1.06581e-14	1.36986e-05
	926	4	227	206.112	0.138667	0.136597	5579	182.645	1.82681e-05	1	0	8.27421e-08		0.0766629	926	9.80782e-05		23.4674	182.645	-3.55271e-15	1.36986e-05
	927	4	228	207.944	0.186	0.183224	5479	176.466	1.21787e-05	1	0	7.39905e-08		0.0766956	927	3.26954e-05		31.4779	176.466	3.55271e-15	9.13242e-06
	928	4	229	207.708	0.245125	0.241466	5276	166.224	4.87148e-05	1	0	3.90041e-07		0.0767109	928	1.5328e-05		41.4839	166.224	0	3.65297e-05
	929	4	230	207.202	0.288875	0.284564	5128	158.314	4.87148e-05	1	0	4.59656e-07		0.076785	929	7.40703e-05		48.888	158.314	1.42109e-14	3.65297e-05
	930	4	231	207.379	0.34675	0.341575	4897	148.696	4.87148e-05	1	0	5.51746e-07		0.0768144	930	2.93811e-05		58.6825	148.696	-1.42109e-14	3.65297e-05
	931	4	232	206.165	0.4135	0.407328	4561	136.186	1.21787e-05	1	0	1.6449e-07		0.0769386	931	0.000124243		69.979	136.186	0	9.13242e-06
	932	4	233	205.187	0.4375	0.43097	4411	131.146	1.21787e-05	1	0	1.74037e-07		0.077122	932	0.000183364		74.0407	131.146	-1.42109e-14	9.13242e-06
	933	5	1	55.303	0	0	1953	55.303	5.87623e-06	1	0	0		0.0771789	933	5.69435e-05		0	55.303	0	4.56621e-06
	934	5	2	60.634	0	0	2133	60.634	0.00488315	1	0	0		0.0772186	934	3.97099e-05		0	60.634	0	0.00379452
	935	5	3	67.2351	0	0	2340	67.2351	0.00463047	1	0	0		0.0773133	935	9.46454e-05		0	67.2351	0	0.00359817
	936	5	4	69.6784	0.001	0.00098015	2427	69.51	5.87623e-06	1	0	1.90978e-10		0.0774327	936	0.000119399		0.16839	69.51	-5.68989e-15	4.56621e-06
	937	5	5	76.2057	0	0	2665	76.2057	0.00324368	1	0	0		0.0777105	937	0.000277826		0	76.2057	0	0.00252055
	938	5	6	76.8501	0.001	0.00098015	2706	76.6818	4.70098e-05	1	0	1.52782e-09		0.0777421	938	3.15511e-05		0.16839	76.6818	-5.68989e-15	3.65297e-05
	939	5	7	84.2604	0	0	2928	84.2604	0.00156895	1	0	0		0.0778135	939	7.14779e-05		0	84.2604	0	0.00121918
	940	5	8	91.784	0	0	3198	91.784	0.000605252	1	0	0		0.0778283	940	1.47916e-05		0	91.784	0	0.00047032
	941	5	9	96.5462	0.247	0.242097	1941	54.9539	5.87623e-06	1	0	4.71716e-08		0.0778833	941	5.49504e-05		41.5923	54.9539	0	4.56621e-06
	942	5	10	96.818	0.272	0.266601	1822	51.016	5.87623e-06	1	0	5.1946e-08		0.0780032	942	0.000119894		45.802	51.016	0	4.56621e-06
	943	5	11	98.8291	0	0	3477	98.8291	2.35049e-05	1	0	0		0.0780315	943	2.83528e-05		0	98.8291	0	1.82648e-05
	944	5	12	104.212	0.036	0.0352854	3438	98.1495	1.76287e-05	1	0	2.06256e-08		0.0782085	944	0.000176946		6.06203	98.1495	-6.21725e-15	1.36986e-05
	945	5	13	102.506	0.08652	0.0848025	3063	87.9366	0.000146906	1	0	4.13085e-07		0.0782998	945	9.13328e-05		14.5691	87.9366	1.77636e-15	0.000114155
	946	5	14	103.171	0.134844	0.132167	2848	80.4648	0.000188039	1	0	8.2407e-07		0.078415	946	0.000115221		22.7063	80.4648	7.10543e-15	0.000146119
	947	5	15	102.046	0.184958	0.181287	2495	70.9009	0.000141029	1	0	8.47751e-07		0.0784533	947	3.83201e-05		31.1451	70.9009	-3.55271e-15	0.000109589
	948	5	16	102.431	0.2419	0.237098	2189	61.698	0.000117525	1	0	9.23952e-07		0.0787214	948	0.000268102		40.7335	61.698	0	9.13242e-05
	949	5	17	102.705	0.289714	0.283963	1904	53.9198	8.22672e-05	1	0	7.74607e-07		0.0787745	949	5.30272e-05		48.7849	53.9198	0	6.39269e-05
	950	5	18	101.823	0.336357	0.32968	1666	45.1837	8.22672e-05	1	0	8.99315e-07		0.0788434	950	6.89761e-05		56.6391	45.1837	0	6.39269e-05
	951	5	19	101.584	0.402625	0.394633	1426	33.7866	9.40197e-05	1	0	1.23028e-06		0.0788739	951	3.04468e-05		67.7979	33.7866	0	7.30594e-05
	952	5	20	102.953	0.44596	0.437107	1287	27.8582	0.000146906	1	0	2.12921e-06		0.0788882	952	1.42738e-05		75.0951	27.8582	0	0.000114155
	953	5	21	102.19	0.49195	0.482185	1097	19.3505	0.000117525	1	0	1.87903e-06		0.0789763	953	8.81362e-05		82.8393	19.3505	0	9.13242e-05
	954	5	22	102.203	0.552833	0.541859	885	9.11114	7.05147e-05	1	0	1.26695e-06		0.0791471	954	0.000170753		93.0914	9.11114	0	5.47945e-05
	955	5	23	103.835	0.617	0.604752	1	0	2.93811e-05	0	0	0		0.0792628	955	0.000115698		103.835	0	0	2.28311e-05
	956	5	24	102.801	0.6566	0.643566	1	0	2.93811e-05	0	0	0		0.0792901	956	2.73605e-05		102.801	0	0	2.28311e-05
	957	5	25	103.461	0.713667	0.6995	1	0	1.76287e-05	0	0	0		0.0794013	957	0.000111188		103.461	0	0	1.36986e-05
	958	5	26	102.228	0.755667	0.740666	1	0	5.28861e-05	0	0	0		0.0794525	958	5.11712e-05		102.228	0	0	4.10959e-05
	959	5	27	102.221	0.813667	0.797515	1	0	1.76287e-05	0	0	0		0.0797112	959	0.000258719		102.221	0	0	1.36986e-05
	960	5	28	101.688	0.925	0.906638	1	0	5.87623e-06	0	0	0		0.0797482	960	3.69789e-05		101.688	0	0	4.56621e-06
	961	5	29	102.947	0.981	0.961527	1	0	1.17525e-05	0	0	0		0.0798332	961	8.50514e-05		102.947	0	0	9.13242e-06
	962	5	30	110.646	0	0	3791	110.646	0.000252678	1	0	0		0.0798998	962	6.6562e-05		0	110.646	0	0.000196347
	963	5	31	109.769	0.0178551	0.0175006	3733	106.762	0.00040546	1	0	2.35285e-07		0.0800646	963	0.000164776		3.00661	106.762	-2.22045e-15	0.000315068
	964	5	32	109.082	0.0840333	0.0823652	3314	94.9317	0.000352574	1	0	9.62911e-07		0.0801719	964	0.000107296		14.1503	94.9317	-1.77636e-15	0.000273973
	965	5	33	109.423	0.128574	0.126022	3056	87.7724	0.000317316	1	0	1.32596e-06		0.0802835	965	0.000111648		21.6505	87.7724	7.10543e-15	0.000246575
	966	5	34	108.741	0.183067	0.179433	2763	77.9148	0.00026443	1	0	1.57328e-06		0.0803129	966	2.93811e-05		30.8265	77.9148	0	0.000205479
	967	5	35	108.805	0.237548	0.232833	2402	68.8039	0.000182163	1	0	1.40636e-06		0.0803267	967	1.37743e-05		40.0007	68.8039	0	0.000141553
	968	5	36	109.298	0.295351	0.289488	2107	59.564	0.00021742	1	0	2.08701e-06		0.0803531	968	2.64028e-05		49.7341	59.564	0	0.00016895
	969	5	37	109.847	0.342787	0.335983	1851	52.1251	0.000276183	1	0	3.07685e-06		0.0804024	969	4.93802e-05		57.7218	52.1251	0	0.000214612
	970	5	38	109.33	0.399018	0.391097	1609	42.1393	0.000329069	1	0	4.2674e-06		0.0806521	970	0.000249664		67.1905	42.1393	0	0.000255708
	971	5	39	110.062	0.45425	0.445233	1423	33.571	0.000352574	1	0	5.20511e-06		0.0809367	971	0.000284602		76.491	33.571	0	0.000273973
	972	5	40	109.772	0.49622	0.486369	1252	26.2142	0.000240925	1	0	3.88545e-06		0.0810188	972	8.20746e-05		83.5582	26.2142	0	0.000187215
	973	5	41	110.381	0.552314	0.541351	1054	17.377	0.000205668	1	0	3.6918e-06		0.0810545	973	3.56846e-05		93.004	17.377	0	0.000159817
	974	5	42	109.353	0.608087	0.596016	836	6.95761	0.000135153	1	0	2.67102e-06		0.0812135	974	0.000159009		102.396	6.95761	0	0.000105023
	975	5	43	110.156	0.6545	0.641508	1	0	0.000129277	0	0	0		0.0812777	975	6.42323e-05		110.156	0	0	0.000100457
	976	5	44	109.447	0.717048	0.702814	1	0	0.000123401	0	0	0		0.0813813	976	0.000103541		109.447	0	0	9.58904e-05
	977	5	45	110.025	0.768773	0.753512	1	0	0.000129277	0	0	0		0.0814289	977	4.76519e-05		110.025	0	0	0.000100457
	978	5	46	110.547	0.819667	0.803396	1	0	0.000158658	0	0	0		0.0815366	978	0.000107741		110.547	0	0	0.000123288
	979	5	47	110.378	0.87832	0.860885	1	0	0.000146906	0	0	0		0.081565	979	2.83528e-05		110.378	0	0	0.000114155
	980	5	48	110.244	0.922417	0.904106	1	0	7.05147e-05	0	0	0		0.0815905	980	2.54787e-05		110.244	0	0	5.47945e-05
	981	5	49	110.88	0.980643	0.961177	1	0	8.22672e-05	0	0	0		0.0816038	981	1.32922e-05		110.88	0	0	6.39269e-05
	982	5	50	118.816	0	0	4070	118.816	0.000235049	1	0	0		0.0818447	982	0.000240925		0	118.816	0	0.000182648
	983	5	51	117.125	0.0209362	0.0205206	3940	113.599	0.000276183	1	0	1.87922e-07		0.0819239	983	7.9202e-05		3.52544	113.599	6.66134e-15	0.000214612
	984	5	52	116.764	0.090375	0.088581	3555	101.545	9.40197e-05	1	0	2.76154e-07		0.0821985	984	0.000274641		15.2182	101.545	0	7.30594e-05
	985	5	53	116.425	0.135152	0.132469	3262	93.6665	0.000193916	1	0	8.51762e-07		0.0822445	985	4.59841e-05		22.7581	93.6665	3.55271e-15	0.000150685
	986	5	54	116.405	0.183828	0.180179	2978	85.4502	0.000170411	1	0	1.0181e-06		0.082279	986	3.44357e-05		30.9547	85.4502	0	0.00013242
	987	5	55	117.346	0.240125	0.235358	2731	76.911	0.000141029	1	0	1.10061e-06		0.0823789	987	9.99169e-05		40.4346	76.911	7.10543e-15	0.000109589
	988	5	56	117.873	0.2916	0.285812	2399	68.7702	0.000235049	1	0	2.22757e-06		0.0825323	988	0.000153444		49.1024	68.7702	-7.10543e-15	0.000182648
	989	5	57	117.516	0.343423	0.336606	2111	59.6868	0.000305564	1	0	3.41049e-06		0.0825943	989	6.19842e-05		57.8289	59.6868	0	0.000237443
	990	5	58	116.704	0.39795	0.39005	1785	49.6931	0.000235049	1	0	3.03999e-06		0.0826983	990	0.00010397		67.0107	49.6931	0	0.000182648
	991	5	59	117.607	0.453684	0.444678	1586	41.2117	0.000223297	1	0	3.29246e-06		0.0827747	991	7.64299e-05		76.3957	41.2117	0	0.000173516
	992	5	60	117.292	0.499838	0.489916	1409	33.1249	0.00021742	1	0	3.53195e-06		0.0827815	992	6.77625e-06		84.1675	33.1249	0	0.00016895
	993	5	61	117.694	0.55325	0.542268	1214	24.5326	0.000188039	1	0	3.38107e-06		0.083014	993	0.000232493		93.1616	24.5326	0	0.000146119
	994	5	62	118.274	0.60769	0.595628	1020	15.9453	0.000246802	1	0	4.87433e-06		0.083279	994	0.000265029		102.329	15.9453	0	0.000191781
	995	5	63	118.248	0.66025	0.647144	839	7.06908	0.000164534	1	0	3.53061e-06		0.0833036	995	2.4587e-05		111.179	7.06908	0	0.000127854
	996	5	64	117.696	0.715436	0.701234	1	0	0.000229173	0	0	0		0.0833309	996	2.73605e-05		117.696	0	0	0.000178082
	997	5	65	116.683	0.76525	0.750059	1	0	0.000188039	0	0	0		0.0833438	997	1.28269e-05		116.683	0	0	0.000146119
	998	5	66	118.418	0.820378	0.804093	1	0	0.00026443	0	0	0		0.0833881	998	4.43747e-05		118.418	0	0	0.000205479
	999	5	67	117.778	0.874857	0.857491	1	0	0.000164534	0	0	0		0.0834846	999	9.64198e-05		117.778	0	0	0.000127854
	1000	5	68	118.151	0.928135	0.909711	1	0	0.00021742	0	0	0		0.0836326	1000	0.000148073		118.151	0	0	0.00016895
	1001	5	69	117.277	0.980464	0.961002	1	0	0.000164534	0	0	0		0.0836659	1001	3.32304e-05		117.277	0	0	0.000127854
	1002	5	70	126.34	0	0	4254	126.34	0.000558242	1	0	0		0.0837257	1002	5.98147e-05		0	126.34	0	0.00043379
	1003	5	71	124.182	0.0251429	0.0246438	4125	119.948	8.22672e-05	1	0	6.72243e-08		0.0837994	1003	7.37549e-05		4.2338	119.948	-8.88178e-16	6.39269e-05
	1004	5	72	125.135	0.0906667	0.0888669	3770	109.868	1.76287e-05	1	0	5.1946e-08		0.0838998	1004	0.000100331		15.2673	109.868	-5.32907e-15	1.36986e-05
	1005	5	73	125.637	0.130727	0.128132	3632	103.624	6.46385e-05	1	0	2.74626e-07		0.0839426	1005	4.28215e-05		22.0131	103.624	-7.10543e-15	5.02283e-05
	1006	5	74	125.396	0.185417	0.181736	3282	94.1741	0.000141029	1	0	8.49852e-07		0.0841983	1006	0.000255753		31.2223	94.1741	3.55271e-15	0.000109589
	1007	5	75	126.125	0.23928	0.23453	2990	85.8331	0.000146906	1	0	1.14243e-06		0.0844227	1007	0.000224356		40.2923	85.8331	0	0.000114155
	1008	5	76	124.62	0.293667	0.287837	2639	75.1692	0.000211544	1	0	2.01902e-06		0.0846599	1008	0.000237169		49.4504	75.1692	0	0.000164384
	1009	5	77	126.205	0.342775	0.335971	2394	68.4849	0.000235049	1	0	2.6185e-06		0.0846664	1009	6.53908e-06		57.7198	68.4849	-7.10543e-15	0.000182648
	1010	5	78	125.744	0.39875	0.390835	2084	58.5982	0.000188039	1	0	2.43688e-06		0.0846901	1010	2.37264e-05		67.1454	58.5982	0	0.000146119
	1011	5	79	125.514	0.450077	0.441143	1786	49.7256	0.000152782	1	0	2.23482e-06		0.0847832	1011	9.30451e-05		75.7883	49.7256	0	0.000118721
	1012	5	80	126.28	0.50075	0.49081	1606	41.9588	0.000211544	1	0	3.44276e-06		0.0848096	1012	2.64028e-05		84.3211	41.9588	0	0.000164384
	1013	5	81	126.137	0.553447	0.542461	1402	32.9425	0.000223297	1	0	4.01646e-06		0.084822	1013	1.2378e-05		93.1948	32.9425	0	0.000173516
	1014	5	82	125.777	0.610903	0.598776	1172	22.9072	0.000182163	1	0	3.61674e-06		0.0849649	1014	0.000142891		102.87	22.9072	0	0.000141553
	1015	5	83	125.425	0.659683	0.646588	982	14.3412	0.000240925	1	0	5.16538e-06		0.085036	1015	7.11735e-05		111.084	14.3412	0	0.000187215
	1016	5	84	126.231	0.710953	0.696841	829	6.51373	0.000252678	1	0	5.83839e-06		0.0850681	1016	3.20673e-05		119.717	6.51373	0	0.000196347
	1017	5	85	125.541	0.768714	0.753455	1	0	0.000164534	0	0	0		0.0851094	1017	4.13228e-05		125.541	0	0	0.000127854
	1018	5	86	125.729	0.816913	0.800697	1	0	0.000135153	0	0	0		0.0851671	1018	5.77212e-05		125.729	0	0	0.000105023
	1019	5	87	126.192	0.871	0.85371	1	0	0.000105772	0	0	0		0.085264	1019	9.68192e-05		126.192	0	0	8.21918e-05
	1020	5	88	125.103	0.926333	0.907945	1	0	0.000176287	0	0	0		0.0855108	1020	0.000246802		125.103	0	0	0.000136986
	1021	5	89	125.75	0.9791	0.959664	1	0	0.000117525	0	0	0		0.0857396	1021	0.000228868		125.75	0	0	9.13242e-05
	1022	5	90	134.327	0	0	4479	134.327	0.00105772	1	0	0		0.0859561	1022	0.000216503		0	134.327	0	0.000821918
	1023	5	91	136.75	0.0153438	0.0150392	4462	134.166	0.000188039	1	0	9.37702e-08		0.0860459	1023	8.97886e-05		2.58373	134.166	1.77636e-15	0.000146119
	1024	5	92	136.469	0.0724118	0.0709744	4230	124.276	9.98959e-05	1	0	2.35094e-07		0.0860688	1024	2.2896e-05		12.1934	124.276	3.55271e-15	7.76256e-05
	1025	5	93	134.546	0.135733	0.133039	3859	111.69	8.81434e-05	1	0	3.88831e-07		0.0860751	1025	6.31021e-06		22.8561	111.69	0	6.84932e-05
	1026	5	94	135.385	0.189214	0.185458	3629	103.523	8.22672e-05	1	0	5.05901e-07		0.0861438	1026	6.86824e-05		31.8617	103.523	-3.55271e-15	6.39269e-05
	1027	5	95	134.573	0.25	0.245037	3232	92.4752	8.81434e-05	1	0	7.16168e-07		0.0861837	1027	3.98765e-05		42.0974	92.4752	0	6.84932e-05
	1028	5	96	134.833	0.29132	0.285537	2987	85.7777	0.000146906	1	0	1.39089e-06		0.0863216	1028	0.00013789		49.0553	85.7777	0	0.000114155
	1029	5	97	134.181	0.345154	0.338302	2658	76.0603	0.000152782	1	0	1.71384e-06		0.0863471	1029	2.54787e-05		58.1203	76.0603	-7.10543e-15	0.000118721
	1030	5	98	135.806	0.404889	0.396852	2373	67.6267	0.000105772	1	0	1.39185e-06		0.086359	1030	1.19448e-05		68.1791	67.6267	0	8.21918e-05
	1031	5	99	134.166	0.447375	0.438494	2089	58.8324	9.40197e-05	1	0	1.36702e-06		0.0865799	1031	0.000220857		75.3333	58.8324	0	7.30594e-05
	1032	5	100	134.177	0.505611	0.495574	1768	49.0374	0.000105772	1	0	1.73809e-06		0.086818	1032	0.000238164		85.1397	49.0374	0	8.21918e-05
	1033	5	101	134.205	0.555056	0.544037	1570	40.7398	0.000105772	1	0	1.90806e-06		0.086849	1033	3.0945e-05		93.4656	40.7398	0	8.21918e-05
	1034	5	102	134.126	0.606406	0.594369	1375	32.0136	0.000188039	1	0	3.70593e-06		0.0869047	1034	5.5701e-05		102.113	32.0136	0	0.000146119
	1035	5	103	133.839	0.657083	0.64404	1179	23.1928	0.000141029	1	0	3.01172e-06		0.0869981	1035	9.34305e-05		110.646	23.1928	0	0.000109589
	1036	5	104	132.593	0.706895	0.692863	965	13.5594	0.000111648	1	0	2.56503e-06		0.087207	1036	0.000208926		119.034	13.5594	0	8.6758e-05
	1037	5	105	134.937	0.769944	0.754661	802	5.28608	0.000105772	1	0	2.64676e-06		0.0872937	1037	8.6646e-05		129.651	5.28608	0	8.21918e-05
	1038	5	106	134.452	0.825083	0.808705	1	0	0.000141029	0	0	0		0.0873321	1038	3.84808e-05		134.452	0	0	0.000109589
	1039	5	107	133.689	0.8768	0.859395	1	0	5.87623e-05	0	0	0		0.0873984	1039	6.62785e-05		133.689	0	0	4.56621e-05
	1040	5	108	134.382	0.930111	0.911648	1	0	0.000105772	0	0	0		0.0874205	1040	2.20947e-05		134.382	0	0	8.21918e-05
	1041	5	109	134.432	0.9891	0.969466	1	0	5.87623e-05	0	0	0		0.0875536	1041	0.000133063		134.432	0	0	4.56621e-05
	1042	5	110	142.322	0	0	4723	142.322	0.00113999	1	0	0		0.0875597	1042	6.08936e-06		0	142.322	0	0.000885845
	1043	5	111	142.163	0.0132235	0.012961	4689	139.936	0.000998959	1	0	4.29319e-07		0.0877728	1043	0.000213127		2.22671	139.936	-1.37668e-14	0.000776256
	1044	5	112	142.825	0.0753415	0.0738459	4366	130.138	0.000240925	1	0	5.89931e-07		0.0880026	1044	0.000229828		12.6867	130.138	-1.77636e-15	0.000187215
	1045	5	113	143.775	0.133	0.13036	4181	121.379	0.000211544	1	0	9.14403e-07		0.0880142	1045	1.15267e-05		22.3958	121.379	0	0.000164384
	1046	5	114	142.756	0.18681	0.183101	3844	111.299	0.000123401	1	0	7.49207e-07		0.0880387	1046	2.4587e-05		31.4568	111.299	3.55271e-15	9.58904e-05
	1047	5	115	142.655	0.238765	0.234025	3589	102.45	9.98959e-05	1	0	7.7518e-07		0.0880997	1047	6.09862e-05		40.2055	102.45	-7.10543e-15	7.76256e-05
	1048	5	116	142.988	0.290258	0.284496	3279	94.1119	0.000182163	1	0	1.71842e-06		0.0881535	1048	5.37514e-05		48.8765	94.1119	0	0.000141553
	1049	5	117	142.957	0.339292	0.332557	2989	85.8242	0.000141029	1	0	1.55513e-06		0.0882436	1049	9.01605e-05		57.1332	85.8242	0	0.000109589
	1050	5	118	143.236	0.395444	0.387595	2701	76.6472	0.000158658	1	0	2.03907e-06		0.0884453	1050	0.000201613		66.5888	76.6472	0	0.000123288
	1051	5	119	143.03	0.447333	0.438454	2374	67.7034	0.000158658	1	0	2.30663e-06		0.0884751	1051	2.98619e-05		75.3263	67.7034	0	0.000123288
	1052	5	120	142.977	0.501176	0.491228	2083	58.5838	9.98959e-05	1	0	1.62713e-06		0.0885122	1052	3.7134e-05		84.3929	58.5838	0	7.76256e-05
	1053	5	121	141.839	0.557545	0.546478	1735	47.9539	6.46385e-05	1	0	1.17127e-06		0.0885959	1053	8.36134e-05		93.8849	47.9539	0	5.02283e-05
	1054	5	122	143.27	0.60575	0.593726	1588	41.2675	9.40197e-05	1	0	1.85096e-06		0.0888015	1054	0.000205668		102.002	41.2675	0	7.30594e-05
	1055	5	123	142.824	0.655647	0.642632	1388	32.4194	9.98959e-05	1	0	2.12864e-06		0.0889299	1055	0.000128406		110.404	32.4194	0	7.76256e-05
	1056	5	124	139.822	0.714889	0.700698	1099	19.4417	5.28861e-05	1	0	1.22875e-06		0.0889513	1056	2.13213e-05		120.38	19.4417	0	4.10959e-05
	1057	5	125	141.678	0.7718	0.756479	930	11.7152	2.93811e-05	1	0	7.36984e-07		0.0889648	1057	1.35525e-05		129.963	11.7152	0	2.28311e-05
	1058	5	126	142.728	0.8206	0.804311	789	4.54777	5.87623e-05	1	0	1.56717e-06		0.0891866	1058	0.000221784		138.181	4.54777	0	4.56621e-05
	1059	5	127	141.412	0.8685	0.85126	1	0	3.52574e-05	0	0	0		0.0891925	1059	5.87623e-06		141.412	0	0	2.73973e-05
	1060	5	128	143.456	0.938286	0.91966	1	0	4.11336e-05	0	0	0		0.0892283	1060	3.58343e-05		143.456	0	0	3.19635e-05
	1061	5	129	143.297	0.994	0.974269	1	0	2.93811e-05	0	0	0		0.0892872	1061	5.88517e-05		143.297	0	0	2.28311e-05
	1062	5	130	149.521	0	0	4907	149.521	0.00035845	1	0	0		0.0894817	1062	0.000194557		0	149.521	0	0.000278539
	1063	5	131	149.742	0.0256486	0.0251395	4788	145.423	0.00021742	1	0	1.81238e-07		0.0895336	1063	5.18701e-05		4.31897	145.423	-7.99361e-15	0.00016895
	1064	5	132	150.706	0.0837358	0.0820737	4578	136.606	0.00031144	1	0	8.4756e-07		0.0896206	1064	8.70048e-05		14.1003	136.606	0	0.000242009
	1065	5	133	150.566	0.13393	0.131271	4300	128.013	0.000334945	1	0	1.45793e-06		0.0896443	1065	2.37264e-05		22.5524	128.013	-1.06581e-14	0.000260274
	1066	5	134	150.954	0.1874	0.18368	4107	119.398	0.00026443	1	0	1.61052e-06		0.0897798	1066	0.000135525		31.5562	119.398	7.10543e-15	0.000205479
	1067	5	135	151.609	0.2375	0.232786	3856	111.616	0.000188039	1	0	1.45143e-06		0.0898605	1067	8.06869e-05		39.9925	111.616	0	0.000146119
	1068	5	136	150.593	0.2935	0.287674	3542	101.17	0.000164534	1	0	1.56946e-06		0.0898893	1068	2.88167e-05		49.4224	101.17	-7.10543e-15	0.000127854
	1069	5	137	151.352	0.342488	0.33569	3263	93.681	0.000252678	1	0	2.81253e-06		0.0900878	1069	0.00019847		57.6715	93.681	0	0.000196347
	1070	5	138	150.26	0.396147	0.388283	2921	83.5532	0.000199792	1	0	2.57228e-06		0.0902117	1070	0.000123912		66.7071	83.5532	0	0.000155251
	1071	5	139	150.624	0.451	0.442047	2630	74.6802	0.000205668	1	0	3.01459e-06		0.0904257	1071	0.000214021		75.9437	74.6802	0	0.000159817
	1072	5	140	150.324	0.50384	0.493839	2307	65.4825	0.000146906	1	0	2.40556e-06		0.0904603	1072	3.45801e-05		84.8415	65.4825	0	0.000114155
	1073	5	141	149.989	0.551333	0.540389	2038	57.1506	3.52574e-05	1	0	6.31755e-07		0.0904809	1073	2.05751e-05		92.8388	57.1506	0	2.73973e-05
	1074	5	142	150.834	0.611308	0.599173	1731	47.8959	7.6391e-05	1	0	1.5177e-06		0.0906117	1074	0.000130782		102.938	47.8959	0	5.93607e-05
	1075	5	143	150.73	0.646333	0.633503	1603	41.8941	3.52574e-05	1	0	7.40613e-07		0.0906248	1075	1.30782e-05		108.836	41.8941	0	2.73973e-05
	1076	5	144	151.634	0.709667	0.695579	1377	32.1334	1.76287e-05	1	0	4.06592e-07		0.0908125	1076	0.000187747		119.501	32.1334	0	1.36986e-05
	1077	5	145	147.687	0.773	0.757656	1059	17.5217	5.87623e-06	1	0	1.47626e-07		0.0908182	1077	5.67056e-06		130.165	17.5217	0	4.56621e-06
	1078	5	146	151.495	0.819	0.802742	966	13.584	2.93811e-05	1	0	7.82055e-07		0.090875	1078	5.67919e-05		137.911	13.584	0	2.28311e-05
	1079	5	147	149.936	0.87275	0.855425	763	2.97414	2.35049e-05	1	0	6.66704e-07		0.0909589	1079	8.39597e-05		146.962	2.97414	0	1.82648e-05
	1080	5	148	150.126	0.969	0.949765	1	0	1.17525e-05	0	0	0		0.0911505	1080	0.000191523		150.126	0	0	9.13242e-06
	1081	5	149	160.217	0	0	5137	160.217	0.000317316	1	0	0		0.0911733	1081	2.2896e-05		0	160.217	0	0.000246575
	1082	5	150	159.223	0.023	0.0225434	5019	155.35	4.11336e-05	1	0	3.07475e-08		0.0913799	1082	0.000206531		3.87296	155.35	1.15463e-14	3.19635e-05
	1083	5	151	159.405	0.0758214	0.0743163	4837	146.637	0.000164534	1	0	4.05446e-07		0.0915061	1083	0.000126204		12.7675	146.637	-8.88178e-15	0.000127854
	1084	5	152	159.512	0.129875	0.127297	4625	137.642	0.000141029	1	0	5.95278e-07		0.0915259	1084	1.9855e-05		21.8696	137.642	0	0.000109589
	1085	5	153	159.325	0.183613	0.179968	4311	128.406	0.000182163	1	0	1.08705e-06		0.0917071	1085	0.000181176		30.9185	128.406	-3.55271e-15	0.000141553
	1086	5	154	158.13	0.239889	0.235127	4048	117.735	0.000211544	1	0	1.64929e-06		0.0918919	1086	0.00018482		40.3948	117.735	0	0.000164384
	1087	5	155	159.159	0.290781	0.285009	3779	110.195	0.000188039	1	0	1.77705e-06		0.091973	1087	8.10211e-05		48.9646	110.195	7.10543e-15	0.000146119
	1088	5	156	157.824	0.346273	0.339399	3515	99.5156	0.000129277	1	0	1.45487e-06		0.0919784	1088	5.47209e-06		58.3088	99.5156	7.10543e-15	0.000100457
	1089	5	157	157.778	0.401632	0.393659	3169	90.1469	0.000111648	1	0	1.45735e-06		0.0920332	1089	5.48042e-05		67.6306	90.1469	0	8.6758e-05
	1090	5	158	157.376	0.4458	0.436951	2900	82.3078	0.000117525	1	0	1.70276e-06		0.0920459	1090	1.26204e-05		75.0681	82.3078	0	9.13242e-05
	1091	5	159	158.516	0.499	0.489095	2626	74.49	5.87623e-05	1	0	9.5298e-07		0.0921676	1091	0.000121787		84.0265	74.49	0	4.56621e-05
	1092	5	160	159.935	0.563333	0.552151	2295	65.0752	1.76287e-05	1	0	3.22753e-07		0.0923669	1092	0.000199302		94.8595	65.0752	0	1.36986e-05
	1093	5	161	158.375	0.612	0.599851	1978	55.3204	1.76287e-05	1	0	3.50636e-07		0.092389	1093	2.20947e-05		103.054	55.3204	0	1.36986e-05
	1094	5	162	161.812	0.6575	0.644448	1824	51.0953	1.17525e-05	1	0	2.51136e-07		0.0925674	1094	0.000178351		110.716	51.0953	0	9.13242e-06
	1095	5	163	162.289	0.708	0.693946	1627	43.0689	5.87623e-06	1	0	1.35212e-07		0.0927422	1095	0.000174835		119.22	43.0689	0	4.56621e-06
	1096	5	164	157.881	0.7685	0.753245	1298	28.4731	1.17525e-05	1	0	2.93533e-07		0.0927614	1096	1.916e-05		129.407	28.4731	0	9.13242e-06
	1097	5	165	159.099	0.8245	0.808133	1114	20.2621	1.17525e-05	1	0	3.14923e-07		0.0928789	1097	0.000117525		138.837	20.2621	0	9.13242e-06
	1098	5	166	167.701	0	0	5312	167.701	0.000599375	1	0	0		0.0929571	1098	7.81854e-05		0	167.701	0	0.000465753
	1099	5	167	168.938	0.0155641	0.0152551	5282	166.317	0.000229173	1	0	1.15924e-07		0.09301	1099	5.28861e-05		2.62083	166.317	1.24345e-14	0.000178082
	1100	5	168	168.498	0.07675	0.0752265	5039	155.574	0.000188039	1	0	4.69042e-07		0.0930153	1100	5.28057e-06		12.9239	155.574	-5.32907e-15	0.000146119
	1101	5	169	167.979	0.129333	0.126766	4822	146.201	0.000158658	1	0	6.66895e-07		0.0932076	1101	0.000192327		21.7784	146.201	3.55271e-15	0.000123288
	1102	5	170	166.873	0.185706	0.18202	4545	135.602	0.000199792	1	0	1.20584e-06		0.0932198	1102	1.21787e-05		31.271	135.602	-3.55271e-15	0.000155251
	1103	5	171	167.446	0.235059	0.230393	4297	127.864	9.98959e-05	1	0	7.63148e-07		0.0932411	1103	2.13213e-05		39.5815	127.864	0	7.76256e-05
	1104	5	172	167.294	0.290167	0.284407	4062	118.433	0.000141029	1	0	1.32997e-06		0.0934132	1104	0.000172109		48.8611	118.433	0	0.000109589
	1105	5	173	168.018	0.337545	0.330845	3838	111.179	6.46385e-05	1	0	7.09101e-07		0.0935266	1105	0.000113411		56.8392	111.179	0	5.02283e-05
	1106	5	174	165.211	0.390857	0.383098	3513	99.3952	4.11336e-05	1	0	5.22516e-07		0.0936953	1106	0.000168716		65.8163	99.3952	0	3.19635e-05
	1107	5	175	169.271	0.438	0.429305	3346	95.5162	1.17525e-05	1	0	1.67297e-07		0.0937138	1107	1.84894e-05		73.7547	95.5162	0	9.13242e-06
	1108	5	176	168.095	0.502333	0.492362	2920	83.5071	5.28861e-05	1	0	8.63412e-07		0.0937893	1108	7.54489e-05		84.5878	83.5071	0	4.10959e-05
	1109	5	177	167.408	0.572	0.560646	2504	71.0886	2.93811e-05	1	0	5.46197e-07		0.0939749	1109	0.000185595		96.3189	71.0886	0	2.28311e-05
	1110	5	178	168.09	0.616	0.603772	2273	64.3617	1.17525e-05	1	0	2.35285e-07		0.0940259	1110	5.1035e-05		103.728	64.3617	0	9.13242e-06
	1111	5	179	164.989	0.642	0.629256	2031	56.8825	5.87623e-06	1	0	1.22608e-07		0.094031	1111	5.09575e-06		108.106	56.8825	0	4.56621e-06
	1112	5	180	175.732	0	0	5451	175.732	0.00105184	1	0	0		0.0941971	1112	0.000166085		0	175.732	0	0.000817352
	1113	5	181	175.992	0.0167	0.0163685	5422	173.18	0.000822672	1	0	4.46507e-07		0.0943065	1113	0.000109442		2.81211	173.18	-8.88178e-15	0.000639269
	1114	5	182	175.755	0.0768308	0.0753056	5188	162.817	0.000381955	1	0	9.53744e-07		0.0943183	1114	1.17525e-05		12.9375	162.817	1.06581e-14	0.000296804
	1115	5	183	177.01	0.1275	0.124969	5037	155.54	0.000141029	1	0	5.84393e-07		0.0944811	1115	0.000162811		21.4697	155.54	3.55271e-15	0.000109589
	1116	5	184	175.128	0.188833	0.185085	4760	143.331	0.000105772	1	0	6.49134e-07		0.0945017	1116	2.05751e-05		31.7976	143.331	-1.06581e-14	8.21918e-05
	1117	5	185	176.078	0.243684	0.238847	4528	135.044	0.000111648	1	0	8.84228e-07		0.0946808	1117	0.000179099		41.0339	135.044	1.42109e-14	8.6758e-05
	1118	5	186	175.807	0.292143	0.286344	4280	126.613	8.22672e-05	1	0	7.811e-07		0.0947536	1118	7.28082e-05		49.1938	126.613	0	6.39269e-05
	1119	5	187	175.31	0.3449	0.338054	4038	117.233	5.87623e-05	1	0	6.58683e-07		0.0947714	1119	1.78423e-05		58.0776	117.233	7.10543e-15	4.56621e-05
	1120	5	188	176.994	0.384333	0.376704	3881	112.277	3.52574e-05	1	0	4.40395e-07		0.0949317	1120	0.000160272		64.7178	112.277	0	2.73973e-05
	1121	5	189	175.086	0.452	0.443028	3505	98.9743	1.17525e-05	1	0	1.72644e-07		0.0950373	1121	0.000105611		76.1121	98.9743	0	9.13242e-06
	1122	5	190	175.616	0.5008	0.490859	3190	91.2865	2.93811e-05	1	0	4.78209e-07		0.0950865	1122	4.92488e-05		84.3296	91.2865	0	2.28311e-05
	1123	5	191	177.425	0.5524	0.541435	2954	84.406	2.93811e-05	1	0	5.27481e-07		0.0950915	1123	4.9174e-06		93.0185	84.406	0	2.28311e-05
	1124	5	192	174.325	0.612667	0.600505	2507	71.1585	1.76287e-05	1	0	3.51018e-07		0.0953015	1124	0.000210064		103.167	71.1585	0	1.36986e-05
	1125	5	193	174.32	0.638	0.625335	2333	66.8876	5.87623e-06	1	0	1.21844e-07		0.0954586	1125	0.000157112		107.433	66.8876	0	4.56621e-06
	1126	5	194	184.763	0	0	5598	184.763	0.00156308	1	0	0		0.0956315	1126	0.000172831		0	184.763	0	0.00121461
	1127	5	195	183.108	0.0169167	0.0165809	5530	180.259	0.000564118	1	0	3.10148e-07		0.0957941	1127	0.00016263		2.84859	180.259	1.19904e-14	0.000438356
	1128	5	196	184.325	0.0775345	0.0759954	5366	171.269	0.000340821	1	0	8.58828e-07		0.0958054	1128	1.13411e-05		13.056	171.269	1.06581e-14	0.00026484
	1129	5	197	184.26	0.1245	0.122029	5206	163.296	0.000199792	1	0	8.0841e-07		0.0958253	1129	1.9855e-05		20.9645	163.296	1.42109e-14	0.000155251
	1130	5	198	184.898	0.183	0.179367	4988	154.082	0.000123401	1	0	7.33929e-07		0.0959272	1130	0.000101915		30.8153	154.082	1.06581e-14	9.58904e-05
	1131	5	199	183.541	0.238889	0.234147	4759	143.315	0.000105772	1	0	8.21205e-07		0.0960819	1131	0.000154663		40.2264	143.315	-7.10543e-15	8.21918e-05
	1132	5	200	183.235	0.2935	0.287674	4452	133.813	2.35049e-05	1	0	2.24208e-07		0.0961521	1132	7.02599e-05		49.4224	133.813	-7.10543e-15	1.82648e-05
	1133	5	201	184.653	0.318	0.311688	4409	131.105	5.87623e-06	1	0	6.0731e-08		0.0961693	1133	1.72178e-05		53.5479	131.105	7.10543e-15	4.56621e-06
	1134	5	202	180.366	0.411	0.402841	3836	111.158	5.87623e-06	1	0	7.8492e-08		0.0962169	1134	4.75251e-05		69.2082	111.158	0	4.56621e-06
	1135	5	203	182.571	0.446667	0.4378	3755	107.357	1.76287e-05	1	0	2.55911e-07		0.0964196	1135	0.000202712		75.2141	107.357	0	1.36986e-05
	1136	5	204	183.114	0.505667	0.495629	3428	97.9646	1.76287e-05	1	0	2.89714e-07		0.0965712	1136	0.000151613		85.1491	97.9646	0	1.36986e-05
	1137	5	205	183.726	0.56	0.548884	3144	89.4277	5.87623e-06	1	0	1.06948e-07		0.0965759	1137	4.74529e-06		94.2982	89.4277	0	4.56621e-06
	1138	5	206	192.03	0	0	5661	192.03	0.00137504	1	0	0		0.0966743	1138	9.83479e-05		0	192.03	0	0.00106849
	1139	5	207	193.951	0.00839583	0.00822917	5697	192.537	0.000282059	1	0	7.69641e-08		0.0968411	1139	0.000166782		1.41377	192.537	6.88338e-15	0.000219178
	1140	5	208	193.238	0.0707333	0.0693292	5555	181.327	8.81434e-05	1	0	2.02628e-07		0.0969903	1140	0.000149249		11.9108	181.327	-1.06581e-14	6.84932e-05
	1141	5	209	193.857	0.132	0.12938	5378	171.63	7.05147e-05	1	0	3.02509e-07		0.0971473	1141	0.000156938		22.2274	171.63	-1.06581e-14	5.47945e-05
	1142	5	210	194.57	0.183667	0.180021	5220	163.642	3.52574e-05	1	0	2.10458e-07		0.0972151	1142	6.78008e-05		30.9276	163.642	1.06581e-14	2.73973e-05
	1143	5	211	192.258	0.226	0.221514	4989	154.202	1.17525e-05	1	0	8.63221e-08		0.0972342	1143	1.916e-05		38.0561	154.202	-7.10543e-15	9.13242e-06
	1144	5	212	192.907	0.27	0.26464	4866	147.441	5.87623e-06	1	0	5.15641e-08		0.0972452	1144	1.09442e-05		45.4652	147.441	-7.10543e-15	4.56621e-06
	1145	5	213	190.791	0.456	0.446948	3976	114.005	5.87623e-06	1	0	8.7086e-08		0.0972618	1145	1.66152e-05		76.7857	114.005	0	4.56621e-06
	1146	5	214	200.029	0	0	5751	200.029	0.000628756	1	0	0		0.0973567	1146	9.49058e-05		0	200.029	0	0.000488584
	1147	5	215	199.731	0.0035	0.00343052	5730	199.142	0.000270306	1	0	3.07475e-08		0.0974025	1147	4.58617e-05		0.589364	199.142	-5.9952e-15	0.000210046
	1148	5	216	201.421	0.0872222	0.0854908	5630	186.734	5.28861e-05	1	0	1.49918e-07		0.0975488	1148	0.000146307		14.6873	186.734	-3.55271e-15	4.10959e-05
	1149	5	217	200.136	0.1361	0.133398	5488	177.218	5.87623e-05	1	0	2.59921e-07		0.0977445	1149	0.000195617		22.9178	177.218	1.06581e-14	4.56621e-05
	1150	5	218	201.582	0.185364	0.181684	5355	170.369	6.46385e-05	1	0	3.89404e-07		0.0979054	1150	0.000160944		31.2133	170.369	-1.42109e-14	5.02283e-05
	1151	5	219	201.223	0.234	0.229355	5173	161.82	2.35049e-05	1	0	1.78755e-07		0.0980494	1151	0.000144026		39.4032	161.82	7.10543e-15	1.82648e-05
	1152	5	220	202.555	0.29	0.284243	4980	153.722	2.93811e-05	1	0	2.76918e-07		0.098054	1152	4.5792e-06		48.833	153.722	0	2.28311e-05
	1153	5	221	201.901	0.321	0.314628	4881	147.848	2.93811e-05	1	0	3.0652e-07		0.0982055	1153	0.000151445		54.0531	147.848	-1.42109e-14	2.28311e-05
	1154	5	222	199.576	0.383667	0.376051	4525	134.97	1.76287e-05	1	0	2.19816e-07		0.0982709	1154	6.54277e-05		64.6055	134.97	-1.42109e-14	1.36986e-05
	1155	5	223	202.003	0.437	0.428325	4312	128.417	1.76287e-05	1	0	2.50372e-07		0.0983625	1155	9.1584e-05		73.5863	128.417	1.42109e-14	1.36986e-05
	1156	5	224	207.453	0	0	5776	207.453	5.28861e-05	1	0	0		0.098381	1156	1.84894e-05		0	207.453	0	4.10959e-05
	1157	5	225	209.305	0.00366667	0.00359388	5805	208.688	1.76287e-05	1	0	2.10076e-09		0.098397	1157	1.60337e-05		0.617429	208.688	7.54952e-15	1.36986e-05
	1158	5	226	207.563	0.095	0.0931142	5655	191.566	1.76287e-05	1	0	5.44287e-08		0.0984076	1158	1.05611e-05		15.997	191.566	-3.55271e-15	1.36986e-05
	1159	5	227	206.112	0.138667	0.135914	5580	182.762	1.76287e-05	1	0	7.94469e-08		0.0985465	1159	0.000138985		23.35	182.762	0	1.36986e-05
	1160	5	228	207.944	0.186	0.182308	5480	176.624	1.17525e-05	1	0	7.10438e-08		0.0986877	1160	0.000141186		31.3205	176.624	-3.55271e-15	9.13242e-06
	1161	5	229	207.708	0.245125	0.240259	5291	166.431	4.70098e-05	1	0	3.74508e-07		0.0988765	1161	0.00018877		41.2765	166.431	-7.10543e-15	3.65297e-05
	1162	5	230	207.202	0.288875	0.283141	5130	158.559	4.70098e-05	1	0	4.4135e-07		0.0990318	1162	0.000155311		48.6436	158.559	7.10543e-15	3.65297e-05
	1163	5	231	207.379	0.34675	0.339867	4900	148.99	4.70098e-05	1	0	5.29773e-07		0.0990761	1163	4.42566e-05		58.3891	148.99	-7.10543e-15	3.65297e-05
	1164	5	232	206.165	0.4135	0.405292	4576	136.536	1.17525e-05	1	0	1.57939e-07		0.0991644	1164	8.83786e-05		69.6291	136.536	0	9.13242e-06
	1165	5	233	205.187	0.4375	0.428815	4423	131.516	1.17525e-05	1	0	1.67106e-07		0.0993106	1165	0.000146145		73.6705	131.516	0	9.13242e-06
	1166	6	1	55.303	0	0	1953	55.303	5.67056e-06	1	0	0		0.099315	1166	4.41893e-06		0	55.303	0	4.56621e-06
	1167	6	2	60.634	0	0	2133	60.634	0.00471224	1	0	0		0.0995318	1167	0.00021684		0	60.634	0	0.00379452
	1168	6	3	67.2351	0	0	2340	67.2351	0.0044684	1	0	0		0.099595	1168	6.31378e-05		0	67.2351	0	0.00359817
	1169	6	4	69.6784	0.001	0.000975249	2428	69.5109	5.67056e-06	1	0	1.83372e-10		0.0997291	1169	0.00013412		0.167548	69.5109	4.69069e-15	4.56621e-06
	1170	6	5	76.2057	0	0	2665	76.2057	0.00313015	1	0	0		0.099879	1170	0.000149875		0	76.2057	0	0.00252055
	1171	6	6	76.8501	0.001	0.000975249	2707	76.6826	4.53645e-05	1	0	1.46698e-09		0.100015	1171	0.000136245		0.167548	76.6826	4.69069e-15	3.65297e-05
	1172	6	7	84.2604	0	0	2928	84.2604	0.00151404	1	0	0		0.100197	1172	0.000182163		0	84.2604	0	0.00121918
	1173	6	8	91.784	0	0	3198	91.784	0.000584068	1	0	0		0.100213	1173	1.54725e-05		0	91.784	0	0.00047032
	1174	6	9	96.5462	0.247	0.240886	1944	55.1619	5.67056e-06	1	0	4.5293e-08		0.100231	1174	1.78423e-05		41.3843	55.1619	0	4.56621e-06
	1175	6	10	96.818	0.272	0.265268	1829	51.245	5.67056e-06	1	0	4.98773e-08		0.100316	1175	8.52854e-05		45.573	51.245	0	4.56621e-06
	1176	6	11	98.8291	0	0	3477	98.8291	2.26822e-05	1	0	0		0.100359	1176	4.27076e-05		0	98.8291	0	1.82648e-05
	1177	6	12	104.212	0.036	0.035109	3440	98.1798	1.70117e-05	1	0	1.98042e-08		0.100369	1177	1.01915e-05		6.03172	98.1798	-1.77636e-15	1.36986e-05
	1178	6	13	102.506	0.08652	0.0843785	3069	88.0094	0.000141764	1	0	3.96634e-07		0.100578	1178	0.000209251		14.4962	88.0094	5.32907e-15	0.000114155
	1179	6	14	103.171	0.134844	0.131506	2855	80.5783	0.000181458	1	0	7.91252e-07		0.100719	1179	0.000141029		22.5928	80.5783	0	0.000146119
	1180	6	15	102.046	0.184958	0.18038	2502	71.0566	0.000136093	1	0	8.1399e-07		0.100849	1180	0.000129426		30.9893	71.0566	-3.55271e-15	0.000109589
	1181	6	16	102.431	0.2419	0.235913	2195	61.9017	0.000113411	1	0	8.87155e-07		0.100853	1181	4.26427e-06		40.5298	61.9017	0	9.13242e-05
	1182	6	17	102.705	0.289714	0.282543	1911	54.1637	7.93878e-05	1	0	7.43758e-07		0.100914	1182	6.0928e-05		48.541	54.1637	0	6.39269e-05
	1183	6	18	101.823	0.336357	0.328032	1673	45.4669	7.93878e-05	1	0	8.635e-07		0.101058	1183	0.00014463		56.3559	45.4669	0	6.39269e-05
	1184	6	19	101.584	0.402625	0.39266	1435	34.1256	9.0729e-05	1	0	1.18128e-06		0.101141	1184	8.23004e-05		67.4589	34.1256	0	7.30594e-05
	1185	6	20	102.953	0.44596	0.434922	1294	28.2336	0.000141764	1	0	2.04442e-06		0.101272	1185	0.000131476		74.7196	28.2336	0	0.000114155
	1186	6	21	102.19	0.49195	0.479774	1105	19.7647	0.000113411	1	0	1.8042e-06		0.101448	1186	0.000175787		82.4251	19.7647	0	9.13242e-05
	1187	6	22	102.203	0.552833	0.53915	895	9.5766	6.80467e-05	1	0	1.21649e-06		0.101463	1187	1.4931e-05		92.626	9.5766	0	5.47945e-05
	1188	6	23	103.835	0.617	0.601728	721	0.458	2.83528e-05	1	0	5.65704e-07		0.10148	1188	1.72178e-05		103.377	0.458	0	2.28311e-05
	1189	6	24	102.801	0.6566	0.640348	1	0	2.83528e-05	0	0	0		0.101521	1189	4.12128e-05		102.801	0	0	2.28311e-05
	1190	6	25	103.461	0.713667	0.696003	1	0	1.70117e-05	0	0	0		0.101723	1190	0.000201927		103.461	0	0	1.36986e-05
	1191	6	26	102.228	0.755667	0.736963	1	0	5.1035e-05	0	0	0		0.101848	1191	0.000124896		102.228	0	0	4.10959e-05
	1192	6	27	102.221	0.813667	0.793527	1	0	1.70117e-05	0	0	0		0.101858	1192	9.83479e-06		102.221	0	0	1.36986e-05
	1193	6	28	101.688	0.925	0.902105	1	0	5.67056e-06	0	0	0		0.101994	1193	0.000136093		101.688	0	0	4.56621e-06
	1194	6	29	102.947	0.981	0.956719	1	0	1.13411e-05	0	0	0		0.102074	1194	7.94199e-05		102.947	0	0	9.13242e-06
	1195	6	30	110.646	0	0	3791	110.646	0.000243834	1	0	0		0.102132	1195	5.87955e-05		0	110.646	0	0.000196347
	1196	6	31	109.769	0.0178551	0.0174131	3734	106.777	0.000391269	1	0	2.25915e-07		0.102272	1196	0.000139568		2.99158	106.777	-1.77636e-15	0.000315068
	1197	6	32	109.082	0.0840333	0.0819534	3319	95.0024	0.000340234	1	0	9.24563e-07		0.102276	1197	4.11502e-06		14.0796	95.0024	1.77636e-15	0.000273973
	1198	6	33	109.423	0.128574	0.125392	3062	87.8806	0.00030621	1	0	1.27315e-06		0.102403	1198	0.000126874		21.5423	87.8806	0	0.000246575
	1199	6	34	108.741	0.183067	0.178536	2769	78.0689	0.000255175	1	0	1.51062e-06		0.102572	1199	0.000169635		30.6724	78.0689	0	0.000205479
	1200	6	35	108.805	0.237548	0.231669	2407	69.0039	0.000175787	1	0	1.35035e-06		0.102767	1200	0.000194859		39.8007	69.0039	0	0.000141553
	1201	6	36	109.298	0.295351	0.288041	2112	59.8127	0.000209811	1	0	2.00389e-06		0.102782	1201	1.44084e-05		49.4855	59.8127	0	0.00016895
	1202	6	37	109.847	0.342787	0.334303	1860	52.4137	0.000266516	1	0	2.95431e-06		0.102902	1202	0.000120525		57.4332	52.4137	0	0.000214612
	1203	6	38	109.33	0.399018	0.389142	1617	42.4753	0.000317551	1	0	4.09745e-06		0.102942	1203	3.97704e-05		66.8545	42.4753	0	0.000255708
	1204	6	39	110.062	0.45425	0.443007	1430	33.9535	0.000340234	1	0	4.99781e-06		0.103019	1204	7.66402e-05		76.1086	33.9535	0	0.000273973
	1205	6	40	109.772	0.49622	0.483937	1263	26.632	0.000232493	1	0	3.73071e-06		0.103035	1205	1.66152e-05		83.1405	26.632	0	0.000187215
	1206	6	41	110.381	0.552314	0.538644	1069	17.842	0.00019847	1	0	3.54477e-06		0.103167	1206	0.00013133		92.539	17.842	0	0.000159817
	1207	6	42	109.353	0.608087	0.593036	849	7.46959	0.000130423	1	0	2.56465e-06		0.103301	1207	0.000134683		101.884	7.46959	0	0.000105023
	1208	6	43	110.156	0.6545	0.6383	722	0.49633	0.000124752	1	0	2.64038e-06		0.103358	1208	5.67376e-05		109.66	0.49633	0	0.000100457
	1209	6	44	109.447	0.717048	0.6993	1	0	0.000119082	0	0	0		0.103368	1209	9.49058e-06		109.447	0	0	9.58904e-05
	1210	6	45	110.025	0.768773	0.749745	1	0	0.000124752	0	0	0		0.10349	1210	0.000122434		110.025	0	0	0.000100457
	1211	6	46	110.547	0.819667	0.799379	1	0	0.000153105	0	0	0		0.103654	1211	0.000163698		110.547	0	0	0.000123288
	1212	6	47	110.378	0.87832	0.85658	1	0	0.000141764	0	0	0		0.103658	1212	3.97099e-06		110.378	0	0	0.000114155
	1213	6	48	110.244	0.922417	0.899586	1	0	6.80467e-05	0	0	0		0.103935	1213	0.000277826		110.244	0	0	5.47945e-05
	1214	6	49	110.88	0.980643	0.956371	1	0	7.93878e-05	0	0	0		0.104124	1214	0.000188039		110.88	0	0	6.39269e-05
	1215	6	50	118.816	0	0	4070	118.816	0.000226822	1	0	0		0.10424	1215	0.000116306		0	118.816	0	0.000182648
	1216	6	51	117.125	0.0209362	0.020418	3941	113.617	0.000266516	1	0	1.80438e-07		0.104314	1216	7.39578e-05		3.50781	113.617	3.9968e-15	0.000214612
	1217	6	52	116.764	0.090375	0.0881381	3557	101.622	9.0729e-05	1	0	2.65156e-07		0.104352	1217	3.83784e-05		15.1421	101.622	0	7.30594e-05
	1218	6	53	116.425	0.135152	0.131806	3267	93.7803	0.000187128	1	0	8.17841e-07		0.104482	1218	0.000129969		22.6443	93.7803	0	0.000150685
	1219	6	54	116.405	0.183828	0.179278	2983	85.605	0.000164446	1	0	9.77558e-07		0.104609	1219	0.000126734		30.7999	85.605	-3.55271e-15	0.00013242
	1220	6	55	117.346	0.240125	0.234182	2737	77.1131	0.000136093	1	0	1.05677e-06		0.104625	1220	1.60337e-05		40.2324	77.1131	-7.10543e-15	0.000109589
	1221	6	56	117.873	0.2916	0.284383	2408	69.0157	0.000226822	1	0	2.13885e-06		0.10468	1221	5.47518e-05		48.8569	69.0157	-7.10543e-15	0.000182648
	1222	6	57	117.516	0.343423	0.334923	2118	59.9759	0.000294869	1	0	3.27466e-06		0.104798	1222	0.000118149		57.5398	59.9759	0	0.000237443
	1223	6	58	116.704	0.39795	0.3881	1794	50.0282	0.000226822	1	0	2.91892e-06		0.105066	1223	0.000268102		66.6756	50.0282	0	0.000182648
	1224	6	59	117.607	0.453684	0.442455	1596	41.5936	0.000215481	1	0	3.16134e-06		0.105224	1224	0.000157968		76.0138	41.5936	0	0.000173516
	1225	6	60	117.292	0.499838	0.487466	1421	33.5457	0.000209811	1	0	3.39129e-06		0.105295	1225	7.13692e-05		83.7467	33.5457	0	0.00016895
	1226	6	61	117.694	0.55325	0.539556	1227	24.9984	0.000181458	1	0	3.24642e-06		0.105407	1226	0.000112236		92.6958	24.9984	0	0.000146119
	1227	6	62	118.274	0.60769	0.592649	1032	16.457	0.000238164	1	0	4.68021e-06		0.105589	1227	0.000181458		101.817	16.457	0	0.000191781
	1228	6	63	118.248	0.66025	0.643908	852	7.62498	0.000158776	1	0	3.39e-06		0.105598	1228	9.1584e-06		110.623	7.62498	0	0.000127854
	1229	6	64	117.696	0.715436	0.697728	1	0	0.000221152	0	0	0		0.105602	1229	3.83201e-06		117.696	0	0	0.000178082
	1230	6	65	116.683	0.76525	0.746309	1	0	0.000181458	0	0	0		0.105727	1230	0.00012542		116.683	0	0	0.000146119
	1231	6	66	118.418	0.820378	0.800072	1	0	0.000255175	0	0	0		0.105764	1231	3.70352e-05		118.418	0	0	0.000205479
	1232	6	67	117.778	0.874857	0.853203	1	0	0.000158776	0	0	0		0.105833	1232	6.88713e-05		117.778	0	0	0.000127854
	1233	6	68	118.151	0.928135	0.905163	1	0	0.000209811	0	0	0		0.106092	1233	0.000258719		118.151	0	0	0.00016895
	1234	6	69	117.277	0.980464	0.956197	1	0	0.000158776	0	0	0		0.106214	1234	0.000122298		117.277	0	0	0.000127854
	1235	6	70	126.34	0	0	4254	126.34	0.000538703	1	0	0		0.106323	1235	0.000108307		0	126.34	0	0.00043379
	1236	6	71	124.182	0.0251429	0.0245205	4126	119.97	7.93878e-05	1	0	6.45471e-08		0.106475	1236	0.000152439		4.21263	119.97	5.32907e-15	6.39269e-05
	1237	6	72	125.135	0.0906667	0.0884226	3771	109.944	1.70117e-05	1	0	4.98773e-08		0.10665	1237	0.000175107		15.191	109.944	3.55271e-15	1.36986e-05
	1238	6	73	125.637	0.130727	0.127492	3635	103.734	6.23762e-05	1	0	2.63689e-07		0.106666	1238	1.54725e-05		21.9031	103.734	3.55271e-15	5.02283e-05
	1239	6	74	125.396	0.185417	0.180827	3286	94.3302	0.000136093	1	0	8.16007e-07		0.106787	1239	0.00012103		31.0661	94.3302	-7.10543e-15	0.000109589
	1240	6	75	126.125	0.23928	0.233358	2996	86.0346	0.000141764	1	0	1.09693e-06		0.106795	1240	8.83786e-06		40.0908	86.0346	0	0.000114155
	1241	6	76	124.62	0.293667	0.286398	2645	75.4165	0.00020414	1	0	1.93861e-06		0.106799	1241	3.69789e-06		49.2032	75.4165	0	0.000164384
	1242	6	77	126.205	0.342775	0.334291	2400	68.7735	0.000226822	1	0	2.51422e-06		0.106866	1242	6.64608e-05		57.4312	68.7735	7.10543e-15	0.000182648
	1243	6	78	125.744	0.39875	0.38888	2092	58.9339	0.000181458	1	0	2.33983e-06		0.107115	1243	0.000249664		66.8097	58.9339	0	0.000146119
	1244	6	79	125.514	0.450077	0.438937	1799	50.1045	0.000147435	1	0	2.14582e-06		0.10722	1244	0.000104517		75.4094	50.1045	0	0.000118721
	1245	6	80	126.28	0.50075	0.488356	1612	42.3804	0.00020414	1	0	3.30565e-06		0.107233	1245	1.35525e-05		83.8995	42.3804	0	0.000164384
	1246	6	81	126.137	0.553447	0.539749	1414	33.4085	0.000215481	1	0	3.8565e-06		0.107269	1246	3.57389e-05		92.7289	33.4085	0	0.000173516
	1247	6	82	125.777	0.610903	0.595783	1186	23.4215	0.000175787	1	0	3.4727e-06		0.107438	1247	0.000168978		102.355	23.4215	0	0.000141553
	1248	6	83	125.425	0.659683	0.643355	993	14.8966	0.000232493	1	0	4.95967e-06		0.107556	1248	0.000118018		110.528	14.8966	0	0.000187215
	1249	6	84	126.231	0.710953	0.693357	841	7.11232	0.000243834	1	0	5.60588e-06		0.107703	1249	0.000147104		119.119	7.11232	0	0.000196347
	1250	6	85	125.541	0.768714	0.749688	1	0	0.000158776	0	0	0		0.107718	1250	1.4931e-05		125.541	0	0	0.000127854
	1251	6	86	125.729	0.816913	0.796693	1	0	0.000130423	0	0	0		0.107782	1251	6.41347e-05		125.729	0	0	0.000105023
	1252	6	87	126.192	0.871	0.849442	1	0	0.00010207	0	0	0		0.108023	1252	0.000240925		126.192	0	0	8.21918e-05
	1253	6	88	125.103	0.926333	0.903405	1	0	0.000170117	0	0	0		0.108124	1253	0.000100859		125.103	0	0	0.000136986
	1254	6	89	125.75	0.9791	0.954866	1	0	0.000113411	0	0	0		0.108293	1254	0.000169406		125.75	0	0	9.13242e-05
	1255	6	90	134.327	0	0	4479	134.327	0.0010207	1	0	0		0.108297	1255	3.56846e-06		0	134.327	0	0.000821918
	1256	6	91	136.75	0.0153438	0.014964	4463	134.179	0.000181458	1	0	9.00358e-08		0.10846	1256	0.000163064		2.57081	134.179	-1.02141e-14	0.000146119
	1257	6	92	136.469	0.0724118	0.0706195	4231	124.337	9.63995e-05	1	0	2.25731e-07		0.108469	1257	8.52854e-06		12.1324	124.337	-5.32907e-15	7.76256e-05
	1258	6	93	134.546	0.135733	0.132374	3863	111.804	8.50584e-05	1	0	3.73346e-07		0.108611	1258	0.000141955		22.7418	111.804	0	6.84932e-05
	1259	6	94	135.385	0.189214	0.184531	3634	103.683	7.93878e-05	1	0	4.85753e-07		0.108645	1259	3.44881e-05		31.7024	103.683	3.55271e-15	6.39269e-05
	1260	6	95	134.573	0.25	0.243812	3237	92.6857	8.50584e-05	1	0	6.87646e-07		0.108759	1260	0.000113887		41.8869	92.6857	0	6.84932e-05
	1261	6	96	134.833	0.29132	0.284109	2995	86.023	0.000141764	1	0	1.3355e-06		0.108821	1261	6.189e-05		48.81	86.023	0	0.000114155
	1262	6	97	134.181	0.345154	0.336611	2693	76.3509	0.000147435	1	0	1.64558e-06		0.108834	1262	1.30782e-05		57.8297	76.3509	0	0.000118721
	1263	6	98	135.806	0.404889	0.394867	2380	67.9675	0.00010207	1	0	1.33642e-06		0.109066	1263	0.000232493		67.8382	67.9675	0	8.21918e-05
	1264	6	99	134.166	0.447375	0.436302	2099	59.2091	9.0729e-05	1	0	1.31258e-06		0.10923	1264	0.000163477		74.9567	59.2091	0	7.30594e-05
	1265	6	100	134.177	0.505611	0.493097	1779	49.4631	0.00010207	1	0	1.66887e-06		0.109244	1265	1.44084e-05		84.714	49.4631	0	8.21918e-05
	1266	6	101	134.205	0.555056	0.541317	1585	41.2071	0.00010207	1	0	1.83207e-06		0.109402	1266	0.000157357		92.9983	41.2071	0	8.21918e-05
	1267	6	102	134.126	0.606406	0.591397	1390	32.5241	0.000181458	1	0	3.55834e-06		0.109461	1267	5.97238e-05		101.602	32.5241	0	0.000146119
	1268	6	103	133.839	0.657083	0.64082	1193	23.746	0.000136093	1	0	2.89178e-06		0.109465	1268	3.44357e-06		110.093	23.746	0	0.000109589
	1269	6	104	132.593	0.706895	0.689398	978	14.1546	0.000107741	1	0	2.46287e-06		0.109602	1269	0.000136987		118.439	14.1546	0	8.6758e-05
	1270	6	105	134.937	0.769944	0.750887	817	5.93433	0.00010207	1	0	2.54136e-06		0.109712	1270	0.000109901		129.002	5.93433	0	8.21918e-05
	1271	6	106	134.452	0.825083	0.804661	1	0	0.000136093	0	0	0		0.109745	1271	3.3281e-05		134.452	0	0	0.000109589
	1272	6	107	133.689	0.8768	0.855098	1	0	5.67056e-05	0	0	0		0.109969	1272	0.000224356		133.689	0	0	4.56621e-05
	1273	6	108	134.382	0.930111	0.90709	1	0	0.00010207	0	0	0		0.109978	1273	8.23004e-06		134.382	0	0	8.21918e-05
	1274	6	109	134.432	0.9891	0.964619	1	0	5.67056e-05	0	0	0		0.110135	1274	0.000157755		134.432	0	0	4.56621e-05
	1275	6	110	142.322	0	0	4723	142.322	0.00110009	1	0	0		0.110148	1275	1.26204e-05		0	142.322	0	0.000885845
	1276	6	111	142.163	0.0132235	0.0128962	4691	139.947	0.000963995	1	0	4.12221e-07		0.110206	1276	5.76335e-05		2.21557	139.947	-1.77636e-15	0.000776256
	1277	6	112	142.825	0.0753415	0.0734767	4370	130.202	0.000232493	1	0	5.66437e-07		0.110357	1277	0.000151849		12.6233	130.202	-1.77636e-15	0.000187215
	1278	6	113	143.775	0.133	0.129708	4185	121.491	0.00020414	1	0	8.77987e-07		0.11049	1278	0.000132192		22.2838	121.491	3.55271e-15	0.000164384
	1279	6	114	142.756	0.18681	0.182186	3850	111.456	0.000119082	1	0	7.1937e-07		0.110706	1279	0.000216503		31.2995	111.456	7.10543e-15	9.58904e-05
	1280	6	115	142.655	0.238765	0.232855	3598	102.651	9.63995e-05	1	0	7.44308e-07		0.110858	1280	0.000152234		40.0045	102.651	0	7.76256e-05
	1281	6	116	142.988	0.290258	0.283074	3289	94.3563	0.000175787	1	0	1.64998e-06		0.110964	1281	0.000106054		48.6321	94.3563	0	0.000141553
	1282	6	117	142.957	0.339292	0.330894	2998	86.1099	0.000136093	1	0	1.4932e-06		0.110968	1282	3.32304e-06		56.8476	86.1099	0	0.000109589
	1283	6	118	143.236	0.395444	0.385657	2735	76.9802	0.000153105	1	0	1.95787e-06		0.111	1283	3.21162e-05		66.2558	76.9802	0	0.000123288
	1284	6	119	143.03	0.447333	0.436261	2384	68.08	0.000153105	1	0	2.21477e-06		0.111008	1284	7.94199e-06		74.9497	68.08	0	0.000123288
	1285	6	120	142.977	0.501176	0.488772	2094	59.0058	9.63995e-05	1	0	1.56233e-06		0.111154	1285	0.000146534		83.971	59.0058	0	7.76256e-05
	1286	6	121	141.839	0.557545	0.543746	1748	48.4233	6.23762e-05	1	0	1.12462e-06		0.111167	1286	1.21787e-05		93.4155	48.4233	0	5.02283e-05
	1287	6	122	143.27	0.60575	0.590757	1599	41.7775	9.0729e-05	1	0	1.77724e-06		0.111313	1287	0.000146906		101.492	41.7775	0	7.30594e-05
	1288	6	123	142.824	0.655647	0.639419	1404	32.9714	9.63995e-05	1	0	2.04387e-06		0.111522	1288	0.000208926		109.852	32.9714	0	7.76256e-05
	1289	6	124	139.822	0.714889	0.697194	1110	20.0436	5.1035e-05	1	0	1.17982e-06		0.11165	1289	0.000127566		119.778	20.0436	0	4.10959e-05
	1290	6	125	141.678	0.7718	0.752697	943	12.365	2.83528e-05	1	0	7.07634e-07		0.111752	1290	0.000102342		129.313	12.365	0	2.28311e-05
	1291	6	126	142.728	0.8206	0.800289	801	5.23867	5.67056e-05	1	0	1.50475e-06		0.111755	1291	3.20673e-06		137.49	5.23867	0	4.56621e-05
	1292	6	127	141.412	0.8685	0.847004	1	0	3.40234e-05	0	0	0		0.111786	1292	3.09921e-05		141.412	0	0	2.73973e-05
	1293	6	128	143.456	0.938286	0.915062	1	0	3.96939e-05	0	0	0		0.111928	1293	0.000141406		143.456	0	0	3.19635e-05
	1294	6	129	143.297	0.994	0.969397	1	0	2.83528e-05	0	0	0		0.11207	1294	0.000141764		143.297	0	0	2.28311e-05
	1295	6	130	149.521	0	0	4907	149.521	0.000345904	1	0	0		0.112271	1295	0.000201613		0	149.521	0	0.000278539
	1296	6	131	149.742	0.0256486	0.0250138	4789	145.445	0.000209811	1	0	1.7402e-07		0.112279	1296	7.66402e-06		4.29737	145.445	-3.55271e-15	0.00016895
	1297	6	132	150.706	0.0837358	0.0816633	4580	136.677	0.00030054	1	0	8.13806e-07		0.112402	1297	0.000123101		14.0298	136.677	1.24345e-14	0.000242009
	1298	6	133	150.566	0.13393	0.130615	4305	128.126	0.000323222	1	0	1.39986e-06		0.112414	1298	1.17525e-05		22.4396	128.126	1.42109e-14	0.000260274
	1299	6	134	150.954	0.1874	0.182762	4111	119.556	0.000255175	1	0	1.54638e-06		0.112513	1299	9.87604e-05		31.3984	119.556	-3.55271e-15	0.000205479
	1300	6	135	151.609	0.2375	0.231622	3864	111.816	0.000181458	1	0	1.39363e-06		0.112649	1300	0.000136802		39.7926	111.816	7.10543e-15	0.000146119
	1301	6	136	150.593	0.2935	0.286236	3551	101.417	0.000158776	1	0	1.50695e-06		0.112786	1301	0.000136457		49.1753	101.417	-7.10543e-15	0.000127854
	1302	6	137	151.352	0.342488	0.334011	3273	93.9693	0.000243834	1	0	2.70052e-06		0.11298	1302	0.000194557		57.3832	93.9693	-7.10543e-15	0.000196347
	1303	6	138	150.26	0.396147	0.386342	2923	83.8867	0.000192799	1	0	2.46984e-06		0.11301	1303	2.99074e-05		66.3735	83.8867	0	0.000155251
	1304	6	139	150.624	0.451	0.439837	2637	75.0599	0.00019847	1	0	2.89453e-06		0.113013	1304	3.0945e-06		75.564	75.0599	0	0.000159817
	1305	6	140	150.324	0.50384	0.491369	2315	65.9067	0.000141764	1	0	2.30976e-06		0.113132	1305	0.000118792		84.4173	65.9067	0	0.000114155
	1306	6	141	149.989	0.551333	0.537687	2054	57.6148	3.40234e-05	1	0	6.06596e-07		0.113264	1306	0.000132014		92.3747	57.6148	0	2.73973e-05
	1307	6	142	150.834	0.611308	0.596177	1747	48.4106	7.37173e-05	1	0	1.45726e-06		0.113272	1307	7.39578e-06		102.423	48.4106	0	5.93607e-05
	1308	6	143	150.73	0.646333	0.630336	1613	42.4382	3.40234e-05	1	0	7.11118e-07		0.113403	1308	0.000131681		108.292	42.4382	0	2.73973e-05
	1309	6	144	151.634	0.709667	0.692102	1396	32.7309	1.70117e-05	1	0	3.904e-07		0.113591	1309	0.000187747		118.903	32.7309	0	1.36986e-05
	1310	6	145	147.687	0.773	0.753867	1077	18.1726	5.67056e-06	1	0	1.41747e-07		0.113602	1310	1.13411e-05		129.514	18.1726	0	4.56621e-06
	1311	6	146	151.495	0.819	0.798729	979	14.2736	2.83528e-05	1	0	7.5091e-07		0.113698	1311	9.53038e-05		137.222	14.2736	0	2.28311e-05
	1312	6	147	149.936	0.87275	0.851148	776	3.70895	2.26822e-05	1	0	6.40153e-07		0.113726	1312	2.88606e-05		146.227	3.70895	0	1.82648e-05
	1313	6	148	150.126	0.969	0.945016	1	0	1.13411e-05	0	0	0		0.113729	1313	2.98619e-06		150.126	0	0	9.13242e-06
	1314	6	149	160.217	0	0	5137	160.217	0.00030621	1	0	0		0.113857	1314	0.000127394		0	160.217	0	0.000246575
	1315	6	150	159.223	0.023	0.0224307	5020	155.37	3.96939e-05	1	0	2.95229e-08		0.113971	1315	0.000114635		3.8536	155.37	-5.32907e-15	3.19635e-05
	1316	6	151	159.405	0.0758214	0.0739448	4838	146.701	0.000158776	1	0	3.89299e-07		0.114153	1316	0.000181176		12.7037	146.701	-8.88178e-15	0.000127854
	1317	6	152	159.512	0.129875	0.12666	4628	137.751	0.000136093	1	0	5.71572e-07		0.11428	1317	0.000127072		21.7603	137.751	-3.55271e-15	0.000109589
	1318	6	153	159.325	0.183613	0.179068	4316	128.561	0.000175787	1	0	1.04376e-06		0.114372	1318	9.19682e-05		30.7639	128.561	-7.10543e-15	0.000141553
	1319	6	154	158.13	0.239889	0.233951	4053	117.937	0.00020414	1	0	1.5836e-06		0.114379	1319	7.13692e-06		40.1928	117.937	-7.10543e-15	0.000164384
	1320	6	155	159.159	0.290781	0.283584	3785	110.44	0.000181458	1	0	1.70628e-06		0.114399	1320	2.03287e-05		48.7197	110.44	7.10543e-15	0.000146119
	1321	6	156	157.824	0.346273	0.337702	3519	99.8071	0.000124752	1	0	1.39693e-06		0.114522	1321	0.000122935		58.0172	99.8071	-7.10543e-15	0.000100457
	1322	6	157	157.778	0.401632	0.391691	3177	90.4851	0.000107741	1	0	1.39931e-06		0.114533	1322	1.09442e-05		67.2925	90.4851	0	8.6758e-05
	1323	6	158	157.376	0.4458	0.434766	2910	82.6831	0.000113411	1	0	1.63495e-06		0.114561	1323	2.78505e-05		74.6928	82.6831	0	9.13242e-05
	1324	6	159	158.516	0.499	0.486649	2635	74.9102	5.67056e-05	1	0	9.15028e-07		0.114672	1324	0.000110622		83.6063	74.9102	0	4.56621e-05
	1325	6	160	159.935	0.563333	0.54939	2308	65.5495	1.70117e-05	1	0	3.09899e-07		0.114846	1325	0.000174835		94.3852	65.5495	0	1.36986e-05
	1326	6	161	158.375	0.612	0.596852	1997	55.8356	1.70117e-05	1	0	3.36672e-07		0.114849	1326	2.88167e-06		102.539	55.8356	0	1.36986e-05
	1327	6	162	161.812	0.6575	0.641226	1839	51.6489	1.13411e-05	1	0	2.41135e-07		0.115066	1327	0.00021684		110.163	51.6489	0	9.13242e-06
	1328	6	163	162.289	0.708	0.690476	1638	43.665	5.67056e-06	1	0	1.29828e-07		0.115189	1328	0.000122624		118.624	43.665	0	4.56621e-06
	1329	6	164	157.881	0.7685	0.749479	1310	29.1201	1.13411e-05	1	0	2.81843e-07		0.115307	1329	0.000118632		128.76	29.1201	0	9.13242e-06
	1330	6	165	159.099	0.8245	0.804093	1128	20.9562	1.13411e-05	1	0	3.02381e-07		0.115396	1330	8.87493e-05		138.143	20.9562	0	9.13242e-06
	1331	6	166	167.701	0	0	5312	167.701	0.000578397	1	0	0		0.115511	1331	0.000115196		0	167.701	0	0.000465753
	1332	6	167	168.938	0.0155641	0.0151789	5283	166.33	0.000221152	1	0	1.11307e-07		0.11568	1332	0.000168716		2.60773	166.33	1.06581e-14	0.000178082
	1333	6	168	168.498	0.07675	0.0748503	5045	155.638	0.000181458	1	0	4.50362e-07		0.115687	1333	6.88713e-06		12.8593	155.638	-1.06581e-14	0.000146119
	1334	6	169	167.979	0.129333	0.126132	4825	146.309	0.000153105	1	0	6.40336e-07		0.115706	1334	1.96172e-05		21.6695	146.309	-7.10543e-15	0.000123288
	1335	6	170	166.873	0.185706	0.181109	4550	135.759	0.000192799	1	0	1.15781e-06		0.115813	1335	0.000106751		31.1146	135.759	1.42109e-14	0.000155251
	1336	6	171	167.446	0.235059	0.229241	4302	128.062	9.63995e-05	1	0	7.32756e-07		0.11584	1336	2.68757e-05		39.3836	128.062	0	7.76256e-05
	1337	6	172	167.294	0.290167	0.282985	4067	118.678	0.000136093	1	0	1.277e-06		0.115851	1337	1.05611e-05		48.6168	118.678	-7.10543e-15	0.000109589
	1338	6	173	168.018	0.337545	0.329191	3852	111.463	6.23762e-05	1	0	6.80861e-07		0.115969	1338	0.000118332		56.555	111.463	-7.10543e-15	5.02283e-05
	1339	6	174	165.211	0.390857	0.381183	3517	99.7242	3.96939e-05	1	0	5.01707e-07		0.116083	1339	0.00011448		65.4872	99.7242	0	3.19635e-05
	1340	6	175	169.271	0.438	0.427159	3367	95.885	1.13411e-05	1	0	1.60634e-07		0.116293	1340	0.000209251		73.3859	95.885	0	9.13242e-06
	1341	6	176	168.095	0.502333	0.4899	2924	83.9301	5.1035e-05	1	0	8.29026e-07		0.116378	1341	8.56431e-05		84.1648	83.9301	0	4.10959e-05
	1342	6	177	167.408	0.572	0.557842	2521	71.5702	2.83528e-05	1	0	5.24445e-07		0.116541	1342	0.000162811		95.8373	71.5702	0	2.28311e-05
	1343	6	178	168.09	0.616	0.600753	2289	64.8804	1.13411e-05	1	0	2.25915e-07		0.116652	1343	0.000111164		103.209	64.8804	0	9.13242e-06
	1344	6	179	164.989	0.642	0.62611	2049	57.423	5.67056e-06	1	0	1.17725e-07		0.116763	1344	0.000110473		107.566	57.423	0	4.56621e-06
	1345	6	180	175.732	0	0	5451	175.732	0.00101503	1	0	0		0.116866	1345	0.000103014		0	175.732	0	0.000817352
	1346	6	181	175.992	0.0167	0.0162867	5423	173.194	0.000793878	1	0	4.28724e-07		0.11698	1346	0.000114191		2.79805	173.194	7.99361e-15	0.000639269
	1347	6	182	175.755	0.0768308	0.0749291	5190	162.882	0.000368586	1	0	9.15761e-07		0.117006	1347	2.59351e-05		12.8728	162.882	1.06581e-14	0.000296804
	1348	6	183	177.01	0.1275	0.124344	5047	155.648	0.000136093	1	0	5.61119e-07		0.117025	1348	1.89306e-05		21.3623	155.648	7.10543e-15	0.000109589
	1349	6	184	175.128	0.188833	0.184159	4761	143.49	0.00010207	1	0	6.23283e-07		0.117032	1349	6.64608e-06		31.6386	143.49	1.42109e-14	8.21918e-05
	1350	6	185	176.078	0.243684	0.237653	4534	135.249	0.000107741	1	0	8.49014e-07		0.117233	1350	0.000201927		40.8287	135.249	1.42109e-14	8.6758e-05
	1351	6	186	175.807	0.292143	0.284912	4281	126.859	7.93878e-05	1	0	7.49993e-07		0.117244	1351	1.01915e-05		48.9479	126.859	0	6.39269e-05
	1352	6	187	175.31	0.3449	0.336363	4044	117.523	5.67056e-05	1	0	6.32451e-07		0.117501	1352	0.000257497		57.7872	117.523	-7.10543e-15	4.56621e-05
	1353	6	188	176.994	0.384333	0.374821	3895	112.6	3.40234e-05	1	0	4.22857e-07		0.117658	1353	0.000157112		64.3942	112.6	0	2.73973e-05
	1354	6	189	175.086	0.452	0.440812	3512	99.3548	1.13411e-05	1	0	1.65769e-07		0.117765	1354	0.000106607		75.7316	99.3548	0	9.13242e-06
	1355	6	190	175.616	0.5008	0.488405	3196	91.7082	2.83528e-05	1	0	4.59164e-07		0.117848	1355	8.26456e-05		83.9079	91.7082	0	2.28311e-05
	1356	6	191	177.425	0.5524	0.538727	2961	84.8711	2.83528e-05	1	0	5.06474e-07		0.117958	1356	0.000110194		92.5534	84.8711	0	2.28311e-05
	1357	6	192	174.325	0.612667	0.597502	2528	71.6743	1.70117e-05	1	0	3.37038e-07		0.118065	1357	0.000107274		102.651	71.6743	0	1.36986e-05
	1358	6	193	174.32	0.638	0.622209	2369	67.4247	5.67056e-06	1	0	1.16992e-07		0.118164	1358	9.94088e-05		106.895	67.4247	0	4.56621e-06
	1359	6	194	184.763	0	0	5598	184.763	0.00150837	1	0	0		0.118415	1359	0.000250721		0	184.763	0	0.00121461
	1360	6	195	183.108	0.0169167	0.016498	5531	180.273	0.000544374	1	0	2.97797e-07		0.118567	1360	0.000151613		2.83435	180.273	-1.37668e-14	0.000438356
	1361	6	196	184.325	0.0775345	0.0756154	5369	171.334	0.000328892	1	0	8.24625e-07		0.118762	1361	0.000194859		12.9907	171.334	-8.88178e-15	0.00026484
	1362	6	197	184.26	0.1245	0.121418	5211	163.4	0.000192799	1	0	7.76215e-07		0.118864	1362	0.000102875		20.8597	163.4	1.42109e-14	0.000155251
	1363	6	198	184.898	0.183	0.178471	4991	154.236	0.000119082	1	0	7.047e-07		0.119113	1363	0.000248485		30.6612	154.236	1.06581e-14	9.58904e-05
	1364	6	199	183.541	0.238889	0.232976	4762	143.516	0.00010207	1	0	7.88501e-07		0.119131	1364	1.82681e-05		40.0253	143.516	-7.10543e-15	8.21918e-05
	1365	6	200	183.235	0.2935	0.286236	4456	134.06	2.26822e-05	1	0	2.15279e-07		0.119138	1365	6.41347e-06		49.1753	134.06	-7.10543e-15	1.82648e-05
	1366	6	201	184.653	0.318	0.310129	4421	131.373	5.67056e-06	1	0	5.83124e-08		0.119147	1366	9.83479e-06		53.2802	131.373	1.42109e-14	4.56621e-06
	1367	6	202	180.366	0.411	0.400827	3853	111.504	5.67056e-06	1	0	7.5366e-08		0.119254	1367	0.000106337		68.8621	111.504	0	4.56621e-06
	1368	6	203	182.571	0.446667	0.435611	3756	107.733	1.70117e-05	1	0	2.45719e-07		0.119334	1368	7.9753e-05		74.838	107.733	0	1.36986e-05
	1369	6	204	183.114	0.505667	0.493151	3451	98.3904	1.70117e-05	1	0	2.78176e-07		0.119429	1369	9.59295e-05		84.7233	98.3904	0	1.36986e-05
	1370	6	205	183.726	0.56	0.546139	3163	89.8992	5.67056e-06	1	0	1.02688e-07		0.119671	1370	0.000241946		93.8267	89.8992	0	4.56621e-06
	1371	6	206	192.03	0	0	5661	192.03	0.00132691	1	0	0		0.119775	1371	0.000103519		0	192.03	0	0.00106849
	1372	6	207	193.951	0.00839583	0.00818803	5698	192.544	0.000272187	1	0	7.3899e-08		0.119921	1372	0.000146307		1.4067	192.544	1.26565e-14	0.000219178
	1373	6	208	193.238	0.0707333	0.0689826	5556	181.386	8.50584e-05	1	0	1.94558e-07		0.120021	1373	9.92748e-05		11.8512	181.386	-5.32907e-15	6.84932e-05
	1374	6	209	193.857	0.132	0.128733	5381	171.741	6.80467e-05	1	0	2.90462e-07		0.12026	1374	0.000239788		22.1163	171.741	-7.10543e-15	5.47945e-05
	1375	6	210	194.57	0.183667	0.179121	5225	163.797	3.40234e-05	1	0	2.02076e-07		0.120448	1375	0.000188039		30.7729	163.797	3.55271e-15	2.73973e-05
	1376	6	211	192.258	0.226	0.220406	4994	154.392	1.13411e-05	1	0	8.28843e-08		0.120855	1376	0.000406575		37.8658	154.392	1.42109e-14	9.13242e-06
	1377	6	212	192.907	0.27	0.263317	4874	147.669	5.67056e-06	1	0	4.95105e-08		0.120873	1377	1.76287e-05		45.2379	147.669	-7.10543e-15	4.56621e-06
	1378	6	213	190.791	0.456	0.444713	3987	114.389	5.67056e-06	1	0	8.36178e-08		0.120975	1378	0.000102615		76.4018	114.389	0	4.56621e-06
	1379	6	214	200.029	0	0	5751	200.029	0.00060675	1	0	0		0.121052	1379	7.69616e-05		0	200.029	0	0.000488584
	1380	6	215	199.731	0.0035	0.00341337	5731	199.145	0.000260846	1	0	2.95229e-08		0.121058	1380	6.189e-06		0.586417	199.145	-1.23235e-14	0.000210046
	1381	6	216	201.421	0.0872222	0.0850634	5631	186.807	5.1035e-05	1	0	1.43947e-07		0.121154	1381	9.58002e-05		14.6139	186.807	1.77636e-15	4.10959e-05
	1382	6	217	200.136	0.1361	0.132731	5490	177.333	5.67056e-05	1	0	2.4957e-07		0.121247	1382	9.25719e-05		22.8032	177.333	-7.10543e-15	4.56621e-05
	1383	6	218	201.582	0.185364	0.180776	5356	170.525	6.23762e-05	1	0	3.73896e-07		0.121388	1383	0.000141186		31.0573	170.525	7.10543e-15	5.02283e-05
	1384	6	219	201.223	0.234	0.228208	5175	162.017	2.26822e-05	1	0	1.71636e-07		0.121621	1384	0.000233478		39.2062	162.017	-7.10543e-15	1.82648e-05
	1385	6	220	202.555	0.29	0.282822	4985	153.966	2.83528e-05	1	0	2.6589e-07		0.121631	1385	9.49058e-06		48.5888	153.966	0	2.28311e-05
	1386	6	221	201.901	0.321	0.313055	4888	148.118	2.83528e-05	1	0	2.94313e-07		0.122023	1386	0.000392345		53.7828	148.118	0	2.28311e-05
	1387	6	222	199.576	0.383667	0.37417	4537	135.293	1.70117e-05	1	0	2.11062e-07		0.122132	1387	0.00010842		64.2825	135.293	0	1.36986e-05
	1388	6	223	202.003	0.437	0.426184	4322	128.784	1.70117e-05	1	0	2.40401e-07		0.122232	1388	9.98959e-05		73.2184	128.784	-1.42109e-14	1.36986e-05
	1389	6	224	207.453	0	0	5776	207.453	5.1035e-05	1	0	0		0.122463	1389	0.000231396		0	207.453	0	4.10959e-05
	1390	6	225	209.305	0.00366667	0.00357591	5806	208.691	1.70117e-05	1	0	2.0171e-09		0.122644	1390	0.000181458		0.614342	208.691	7.77156e-15	1.36986e-05
	1391	6	226	207.563	0.095	0.0926486	5656	191.646	1.70117e-05	1	0	5.22611e-08		0.122743	1391	9.9024e-05		15.917	191.646	-1.06581e-14	1.36986e-05
	1392	6	227	206.112	0.138667	0.135234	5581	182.879	1.70117e-05	1	0	7.62829e-08		0.122836	1392	9.24472e-05		23.2333	182.879	1.42109e-14	1.36986e-05
	1393	6	228	207.944	0.186	0.181396	5482	176.78	1.13411e-05	1	0	6.82145e-08		0.122972	1393	0.000136245		31.1639	176.78	-7.10543e-15	9.13242e-06
	1394	6	229	207.708	0.245125	0.239058	5306	166.637	4.53645e-05	1	0	3.59593e-07		0.123197	1394	0.000225306		41.0701	166.637	0	3.65297e-05
	1395	6	230	207.202	0.288875	0.281725	5131	158.802	4.53645e-05	1	0	4.23773e-07		0.123287	1395	8.93319e-05		48.4004	158.802	7.10543e-15	3.65297e-05
	1396	6	231	207.379	0.34675	0.338168	4904	149.281	4.53645e-05	1	0	5.08675e-07		0.123304	1396	1.70117e-05		58.0972	149.281	7.10543e-15	3.65297e-05
	1397	6	232	206.165	0.4135	0.403265	4589	136.884	1.13411e-05	1	0	1.51649e-07		0.123378	1397	7.4268e-05		69.281	136.884	1.42109e-14	9.13242e-06
	1398	6	233	205.187	0.4375	0.426671	4427	131.885	1.13411e-05	1	0	1.60451e-07		0.123483	1398	0.000104625		73.3021	131.885	1.42109e-14	9.13242e-06
	1399	7	1	55.303	0	0	1953	55.303	5.47209e-06	1	0	0		0.123861	1399	0.000378613		0	55.303	0	4.56621e-06
	1400	7	2	60.634	0	0	2133	60.634	0.00454731	1	0	0		0.123867	1400	5.97238e-06		0	60.634	0	0.00379452
	1401	7	3	67.2351	0	0	2340	67.2351	0.00431201	1	0	0		0.123876	1401	9.1584e-06		0	67.2351	0	0.00359817
	1402	7	4	69.6784	0.001	0.000970373	2429	69.5117	5.47209e-06	1	0	1.7607e-10		0.1241	1402	0.000223297		0.16671	69.5117	-2.72005e-15	4.56621e-06
	1403	7	5	76.2057	0	0	2665	76.2057	0.00302059	1	0	0		0.124189	1403	8.92115e-05		0	76.2057	0	0.00252055
	1404	7	6	76.8501	0.001	0.000970373	2708	76.6834	4.37767e-05	1	0	1.40856e-09		0.124285	1404	9.63995e-05		0.16671	76.6834	-2.72005e-15	3.65297e-05
	1405	7	7	84.2604	0	0	2928	84.2604	0.00146105	1	0	0		0.124381	1405	9.55581e-05		0	84.2604	0	0.00121918
	1406	7	8	91.784	0	0	3198	91.784	0.000563625	1	0	0		0.124556	1406	0.000175107		0	91.784	0	0.00047032
	1407	7	9	96.5462	0.247	0.239682	1981	55.3688	5.47209e-06	1	0	4.34892e-08		0.124687	1407	0.000131476		41.1774	55.3688	0	4.56621e-06
	1408	7	10	96.818	0.272	0.263941	1834	51.4729	5.47209e-06	1	0	4.78909e-08		0.124788	1408	0.000100963		45.3451	51.4729	0	4.56621e-06
	1409	7	11	98.8291	0	0	3477	98.8291	2.18884e-05	1	0	0		0.125006	1409	0.00021742		0	98.8291	0	1.82648e-05
	1410	7	12	104.212	0.036	0.0349334	3442	98.21	1.64163e-05	1	0	1.90155e-08		0.125371	1410	0.000365361		6.00156	98.21	8.88178e-16	1.36986e-05
	1411	7	13	102.506	0.08652	0.0839566	3074	88.0819	0.000136802	1	0	3.80838e-07		0.125443	1411	7.16686e-05		14.4237	88.0819	0	0.000114155
	1412	7	14	103.171	0.134844	0.130849	2857	80.6913	0.000175107	1	0	7.5974e-07		0.125529	1412	8.60891e-05		22.4798	80.6913	3.55271e-15	0.000146119
	1413	7	15	102.046	0.184958	0.179478	2509	71.2115	0.00013133	1	0	7.81573e-07		0.125545	1413	1.64163e-05		30.8344	71.2115	-3.55271e-15	0.000109589
	1414	7	16	102.431	0.2419	0.234733	2198	62.1043	0.000109442	1	0	8.51824e-07		0.125761	1414	0.000215481		40.3271	62.1043	0	9.13242e-05
	1415	7	17	102.705	0.289714	0.281131	1920	54.4064	7.66093e-05	1	0	7.14138e-07		0.125853	1415	9.22136e-05		48.2983	54.4064	0	6.39269e-05
	1416	7	18	101.823	0.336357	0.326392	1678	45.7487	7.66093e-05	1	0	8.29111e-07		0.12598	1416	0.000126874		56.0741	45.7487	0	6.39269e-05
	1417	7	19	101.584	0.402625	0.390696	1442	34.4629	8.75534e-05	1	0	1.13424e-06		0.126077	1417	9.74297e-05		67.1216	34.4629	0	7.30594e-05
	1418	7	20	102.953	0.44596	0.432747	1300	28.6072	0.000136802	1	0	1.963e-06		0.126083	1418	5.76335e-06		74.346	28.6072	0	0.000114155
	1419	7	21	102.19	0.49195	0.477375	1113	20.1768	0.000109442	1	0	1.73235e-06		0.126176	1419	9.30255e-05		82.013	20.1768	0	9.13242e-05
	1420	7	22	102.203	0.552833	0.536454	903	10.0397	6.56651e-05	1	0	1.16805e-06		0.126345	1420	0.000168978		92.1628	10.0397	0	5.47945e-05
	1421	7	23	103.835	0.617	0.59872	730	0.974885	2.73605e-05	1	0	5.43174e-07		0.126555	1421	0.000209811		102.86	0.974885	0	2.28311e-05
	1422	7	24	102.801	0.6566	0.637147	1	0	2.73605e-05	0	0	0		0.126564	1422	8.83786e-06		102.801	0	0	2.28311e-05
	1423	7	25	103.461	0.713667	0.692523	1	0	1.64163e-05	0	0	0		0.126916	1423	0.000352574		103.461	0	0	1.36986e-05
	1424	7	26	102.228	0.755667	0.733278	1	0	4.92488e-05	0	0	0		0.126999	1424	8.3076e-05		102.228	0	0	4.10959e-05
	1425	7	27	102.221	0.813667	0.78956	1	0	1.64163e-05	0	0	0		0.127069	1425	6.91602e-05		102.221	0	0	1.36986e-05
	1426	7	28	101.688	0.925	0.897595	1	0	5.47209e-06	0	0	0		0.127163	1426	9.40197e-05		101.688	0	0	4.56621e-06
	1427	7	29	102.947	0.981	0.951935	1	0	1.09442e-05	0	0	0		0.127285	1427	0.000122434		102.947	0	0	9.13242e-06
	1428	7	30	110.646	0	0	3791	110.646	0.0002353	1	0	0		0.127493	1428	0.000207939		0	110.646	0	0.000196347
	1429	7	31	109.769	0.0178551	0.0173261	3735	106.792	0.000377574	1	0	2.16918e-07		0.127509	1429	1.58417e-05		2.97662	106.792	-6.21725e-15	0.000315068
	1430	7	32	109.082	0.0840333	0.0815436	3322	95.0728	0.000328325	1	0	8.87743e-07		0.127849	1430	0.000340234		14.0092	95.0728	-7.10543e-15	0.000273973
	1431	7	33	109.423	0.128574	0.124765	3066	87.9883	0.000295493	1	0	1.22245e-06		0.128052	1431	0.000202467		21.4346	87.9883	-3.55271e-15	0.000246575
	1432	7	34	108.741	0.183067	0.177643	2773	78.2223	0.000246244	1	0	1.45046e-06		0.128132	1432	8.01684e-05		30.519	78.2223	-3.55271e-15	0.000205479
	1433	7	35	108.805	0.237548	0.23051	2414	69.2029	0.000169635	1	0	1.29658e-06		0.128295	1433	0.000163064		39.6017	69.2029	0	0.000141553
	1434	7	36	109.298	0.295351	0.286601	2119	60.0601	0.000202467	1	0	1.92409e-06		0.128385	1434	8.97696e-05		49.238	60.0601	0	0.00016895
	1435	7	37	109.847	0.342787	0.332631	1865	52.7008	0.000257188	1	0	2.83666e-06		0.128475	1435	9.0729e-05		57.1461	52.7008	0	0.000214612
	1436	7	38	109.33	0.399018	0.387196	1622	42.8096	0.000306437	1	0	3.93427e-06		0.128484	1436	8.52854e-06		66.5203	42.8096	0	0.000255708
	1437	7	39	110.062	0.45425	0.440792	1439	34.334	0.000328325	1	0	4.79877e-06		0.128602	1437	0.000118149		75.728	34.334	0	0.000273973
	1438	7	40	109.772	0.49622	0.481518	1272	27.0477	0.000224356	1	0	3.58213e-06		0.128803	1438	0.000200662		82.7248	27.0477	0	0.000187215
	1439	7	41	110.381	0.552314	0.535951	1080	18.3047	0.000191523	1	0	3.4036e-06		0.129131	1439	0.000328325		92.0763	18.3047	0	0.000159817
	1440	7	42	109.353	0.608087	0.590071	861	7.97901	0.000125858	1	0	2.46251e-06		0.129208	1440	7.73625e-05		101.374	7.97901	0	0.000105023
	1441	7	43	110.156	0.6545	0.635109	733	1.04463	0.000120386	1	0	2.53522e-06		0.129404	1441	0.000195381		109.112	1.04463	0	0.000100457
	1442	7	44	109.447	0.717048	0.695803	1	0	0.000114914	0	0	0		0.129491	1442	8.75534e-05		109.447	0	0	9.58904e-05
	1443	7	45	110.025	0.768773	0.745996	1	0	0.000120386	0	0	0		0.129506	1443	1.52872e-05		110.025	0	0	0.000100457
	1444	7	46	110.547	0.819667	0.795382	1	0	0.000147746	0	0	0		0.129664	1444	0.000157357		110.547	0	0	0.000123288
	1445	7	47	110.378	0.87832	0.852298	1	0	0.000136802	0	0	0		0.12975	1445	8.66277e-05		110.378	0	0	0.000114155
	1446	7	48	110.244	0.922417	0.895088	1	0	6.56651e-05	0	0	0		0.129825	1446	7.46548e-05		110.244	0	0	5.47945e-05
	1447	7	49	110.88	0.980643	0.951589	1	0	7.66093e-05	0	0	0		0.130142	1447	0.000316834		110.88	0	0	6.39269e-05
	1448	7	50	118.816	0	0	4070	118.816	0.000218884	1	0	0		0.130336	1448	0.000193638		0	118.816	0	0.000182648
	1449	7	51	117.125	0.0209362	0.0203159	3943	113.634	0.000257188	1	0	1.73252e-07		0.130524	1449	0.000188543		3.49027	113.634	-4.44089e-16	0.000214612
	1450	7	52	116.764	0.090375	0.0876974	3561	101.697	8.75534e-05	1	0	2.54597e-07		0.130609	1450	8.44891e-05		15.0664	101.697	-7.10543e-15	7.30594e-05
	1451	7	53	116.425	0.135152	0.131147	3271	93.8935	0.000180579	1	0	7.8527e-07		0.130617	1451	8.23004e-06		22.5311	93.8935	7.10543e-15	0.000150685
	1452	7	54	116.405	0.183828	0.178381	2986	85.759	0.000158691	1	0	9.38627e-07		0.130689	1452	7.20419e-05		30.6459	85.759	0	0.00013242
	1453	7	55	117.346	0.240125	0.233011	2745	77.3143	0.00013133	1	0	1.01469e-06		0.130841	1453	0.000151849		40.0312	77.3143	0	0.000109589
	1454	7	56	117.873	0.2916	0.282961	2417	69.26	0.000218884	1	0	2.05367e-06		0.131146	1454	0.000305745		48.6126	69.26	7.10543e-15	0.000182648
	1455	7	57	117.516	0.343423	0.333248	2124	60.2636	0.000284549	1	0	3.14425e-06		0.131161	1455	1.47522e-05		57.2521	60.2636	0	0.000237443
	1456	7	58	116.704	0.39795	0.38616	1805	50.3616	0.000218884	1	0	2.80267e-06		0.131243	1456	8.1532e-05		66.3422	50.3616	0	0.000182648
	1457	7	59	117.607	0.453684	0.440243	1607	41.9737	0.000207939	1	0	3.03544e-06		0.131326	1457	8.35957e-05		75.6337	41.9737	0	0.000173516
	1458	7	60	117.292	0.499838	0.485029	1431	33.9644	0.000202467	1	0	3.25623e-06		0.131508	1458	0.000181944		83.328	33.9644	0	0.00016895
	1459	7	61	117.694	0.55325	0.536859	1237	25.4619	0.000175107	1	0	3.11713e-06		0.131695	1459	0.000186861		92.2323	25.4619	0	0.000146119
	1460	7	62	118.274	0.60769	0.589686	1044	16.9661	0.000229828	1	0	4.49382e-06		0.131703	1460	7.94199e-06		101.308	16.9661	0	0.000191781
	1461	7	63	118.248	0.66025	0.640688	866	8.1781	0.000153219	1	0	3.255e-06		0.131998	1461	0.000295044		110.07	8.1781	0	0.000127854
	1462	7	64	117.696	0.715436	0.694239	1	0	0.000213412	0	0	0		0.132077	1462	7.86783e-05		117.696	0	0	0.000178082
	1463	7	65	116.683	0.76525	0.742578	1	0	0.000175107	0	0	0		0.132223	1463	0.000146534		116.683	0	0	0.000146119
	1464	7	66	118.418	0.820378	0.796072	1	0	0.000246244	0	0	0		0.132399	1464	0.000175576		118.418	0	0	0.000205479
	1465	7	67	117.778	0.874857	0.848937	1	0	0.000153219	0	0	0		0.132413	1465	1.42359e-05		117.778	0	0	0.000127854
	1466	7	68	118.151	0.928135	0.900637	1	0	0.000202467	0	0	0		0.132494	1466	8.06699e-05		118.151	0	0	0.00016895
	1467	7	69	117.277	0.980464	0.951416	1	0	0.000153219	0	0	0		0.132674	1467	0.000180321		117.277	0	0	0.000127854
	1468	7	70	126.34	0	0	4254	126.34	0.000519849	1	0	0		0.13275	1468	7.59246e-05		0	126.34	0	0.00043379
	1469	7	71	124.182	0.0251429	0.0243979	4127	119.991	7.66093e-05	1	0	6.19765e-08		0.133035	1469	0.000284717		4.19157	119.991	-4.44089e-15	6.39269e-05
	1470	7	72	125.135	0.0906667	0.0879804	3774	110.02	1.64163e-05	1	0	4.78909e-08		0.133204	1470	0.00016943		15.115	110.02	-1.77636e-15	1.36986e-05
	1471	7	73	125.637	0.130727	0.126854	3642	103.843	6.0193e-05	1	0	2.53188e-07		0.133346	1471	0.000141406		21.7935	103.843	-3.55271e-15	5.02283e-05
	1472	7	74	125.396	0.185417	0.179923	3293	94.4856	0.00013133	1	0	7.83509e-07		0.133353	1472	7.66402e-06		30.9108	94.4856	3.55271e-15	0.000109589
	1473	7	75	126.125	0.23928	0.232191	3001	86.235	0.000136802	1	0	1.05325e-06		0.133427	1473	7.32672e-05		39.8904	86.235	-7.10543e-15	0.000114155
	1474	7	76	124.62	0.293667	0.284966	2649	75.6625	0.000196995	1	0	1.86141e-06		0.133601	1474	0.00017401		48.9572	75.6625	0	0.000164384
	1475	7	77	126.205	0.342775	0.332619	2410	69.0607	0.000218884	1	0	2.41409e-06		0.133875	1475	0.000274752		57.144	69.0607	0	0.000182648
	1476	7	78	125.744	0.39875	0.386936	2100	59.268	0.000175107	1	0	2.24665e-06		0.133953	1476	7.78464e-05		66.4756	59.268	0	0.000146119
	1477	7	79	125.514	0.450077	0.436742	1807	50.4816	0.000142274	1	0	2.06037e-06		0.133967	1477	1.37376e-05		75.0323	50.4816	0	0.000118721
	1478	7	80	126.28	0.50075	0.485914	1621	42.7999	0.000196995	1	0	3.17401e-06		0.13413	1478	0.0001635		83.48	42.7999	0	0.000164384
	1479	7	81	126.137	0.553447	0.53705	1428	33.8722	0.000207939	1	0	3.70292e-06		0.134201	1479	7.07029e-05		92.2652	33.8722	0	0.000173516
	1480	7	82	125.777	0.610903	0.592804	1199	23.9333	0.000169635	1	0	3.3344e-06		0.134338	1480	0.000136457		101.844	23.9333	0	0.000141553
	1481	7	83	125.425	0.659683	0.640138	1007	15.4493	0.000224356	1	0	4.76215e-06		0.134603	1481	0.000265136		109.976	15.4493	0	0.000187215
	1482	7	84	126.231	0.710953	0.68989	854	7.70791	0.0002353	1	0	5.38262e-06		0.134771	1482	0.000167919		118.523	7.70791	0	0.000196347
	1483	7	85	125.541	0.768714	0.745939	1	0	0.000153219	0	0	0		0.134778	1483	7.39578e-06		125.541	0	0	0.000127854
	1484	7	86	125.729	0.816913	0.79271	1	0	0.000125858	0	0	0		0.134853	1484	7.51218e-05		125.729	0	0	0.000105023
	1485	7	87	126.192	0.871	0.845194	1	0	9.84976e-05	0	0	0		0.134921	1485	6.82283e-05		126.192	0	0	8.21918e-05
	1486	7	88	125.103	0.926333	0.898888	1	0	0.000164163	0	0	0		0.134935	1486	1.32568e-05		125.103	0	0	0.000136986
	1487	7	89	125.75	0.9791	0.950092	1	0	0.000109442	0	0	0		0.135092	1487	0.000157778		125.75	0	0	9.13242e-05
	1488	7	90	134.327	0	0	4479	134.327	0.000984976	1	0	0		0.135348	1488	0.000255856		0	134.327	0	0.000821918
	1489	7	91	136.75	0.0153438	0.0148892	4464	134.192	0.000175107	1	0	8.64501e-08		0.13548	1489	0.000131681		2.55796	134.192	1.37668e-14	0.000146119
	1490	7	92	136.469	0.0724118	0.0702664	4232	124.397	9.30255e-05	1	0	2.16742e-07		0.135642	1490	0.000162042		12.0718	124.397	-1.77636e-15	7.76256e-05
	1491	7	93	134.546	0.135733	0.131712	3867	111.918	8.20814e-05	1	0	3.58478e-07		0.135708	1491	6.58403e-05		22.6281	111.918	-3.55271e-15	6.84932e-05
	1492	7	94	135.385	0.189214	0.183608	3641	103.841	7.66093e-05	1	0	4.66408e-07		0.13586	1492	0.000152256		31.5439	103.841	-3.55271e-15	6.39269e-05
	1493	7	95	134.573	0.25	0.242593	3241	92.8952	8.20814e-05	1	0	6.60261e-07		0.135867	1493	7.13692e-06		41.6775	92.8952	7.10543e-15	6.84932e-05
	1494	7	96	134.833	0.29132	0.282689	3003	86.2671	0.000136802	1	0	1.28231e-06		0.13594	1494	7.24926e-05		48.566	86.2671	7.10543e-15	0.000114155
	1495	7	97	134.181	0.345154	0.334928	2699	76.64	0.000142274	1	0	1.58005e-06		0.136187	1495	0.000246901		57.5406	76.64	0	0.000118721
	1496	7	98	135.806	0.404889	0.392893	2388	68.3067	9.84976e-05	1	0	1.28319e-06		0.136199	1496	1.27928e-05		67.499	68.3067	0	8.21918e-05
	1497	7	99	134.166	0.447375	0.43412	2108	59.5839	8.75534e-05	1	0	1.26031e-06		0.136263	1497	6.35359e-05		74.5819	59.5839	0	7.30594e-05
	1498	7	100	134.177	0.505611	0.490631	1790	49.8867	9.84976e-05	1	0	1.60241e-06		0.13639	1498	0.000127072		84.2904	49.8867	0	8.21918e-05
	1499	7	101	134.205	0.555056	0.538611	1597	41.6721	9.84976e-05	1	0	1.75911e-06		0.136546	1499	0.000156371		92.5333	41.6721	0	8.21918e-05
	1500	7	102	134.126	0.606406	0.58844	1406	33.0322	0.000175107	1	0	3.41663e-06		0.136693	1500	0.000146927		101.094	33.0322	0	0.000146119
	1501	7	103	133.839	0.657083	0.637616	1206	24.2965	0.00013133	1	0	2.77662e-06		0.136932	1501	0.00023826		109.542	24.2965	0	0.000109589
	1502	7	104	132.593	0.706895	0.685951	990	14.7468	0.00010397	1	0	2.36479e-06		0.136993	1502	6.13121e-05		117.846	14.7468	0	8.6758e-05
	1503	7	105	134.937	0.769944	0.747133	830	6.57934	9.84976e-05	1	0	2.44015e-06		0.137063	1503	6.99553e-05		128.357	6.57934	0	8.21918e-05
	1504	7	106	134.452	0.825083	0.800638	1	0	0.00013133	0	0	0		0.13707	1504	6.88713e-06		134.452	0	0	0.000109589
	1505	7	107	133.689	0.8768	0.850823	1	0	5.47209e-05	0	0	0		0.137221	1505	0.000150898		133.689	0	0	4.56621e-05
	1506	7	108	134.382	0.930111	0.902554	1	0	9.84976e-05	0	0	0		0.137343	1506	0.000122624		134.382	0	0	8.21918e-05
	1507	7	109	134.432	0.9891	0.959795	1	0	5.47209e-05	0	0	0		0.137356	1507	1.23451e-05		134.432	0	0	4.56621e-05
	1508	7	110	142.322	0	0	4723	142.322	0.00106159	1	0	0		0.137586	1508	0.00022992		0	142.322	0	0.000885845
	1509	7	111	142.163	0.0132235	0.0128317	4693	139.959	0.000930255	1	0	3.95804e-07		0.137727	1509	0.000141784		2.20449	139.959	-8.88178e-15	0.000776256
	1510	7	112	142.825	0.0753415	0.0731093	4373	130.265	0.000224356	1	0	5.43879e-07		0.137786	1510	5.91662e-05		12.5602	130.265	-1.77636e-15	0.000187215
	1511	7	113	143.775	0.133	0.12906	4189	121.603	0.000196995	1	0	8.43021e-07		0.137854	1511	6.75069e-05		22.1724	121.603	-3.55271e-15	0.000164384
	1512	7	114	142.756	0.18681	0.181275	3855	111.613	0.000114914	1	0	6.90721e-07		0.137911	1512	5.70954e-05		31.143	111.613	3.55271e-15	9.58904e-05
	1513	7	115	142.655	0.238765	0.231691	3602	102.851	9.30255e-05	1	0	7.14666e-07		0.138057	1513	0.000145616		39.8045	102.851	-7.10543e-15	7.76256e-05
	1514	7	116	142.988	0.290258	0.281658	3298	94.5995	0.000169635	1	0	1.58427e-06		0.138279	1514	0.000221873		48.3889	94.5995	0	0.000141553
	1515	7	117	142.957	0.339292	0.329239	3006	86.3941	0.00013133	1	0	1.43373e-06		0.138415	1515	0.000136822		56.5633	86.3941	7.10543e-15	0.000109589
	1516	7	118	143.236	0.395444	0.383728	2744	77.3115	0.000147746	1	0	1.87989e-06		0.138422	1516	6.64608e-06		65.9245	77.3115	0	0.000123288
	1517	7	119	143.03	0.447333	0.43408	2393	68.4548	0.000147746	1	0	2.12657e-06		0.13854	1517	0.000118332		74.5749	68.4548	0	0.000123288
	1518	7	120	142.977	0.501176	0.486328	2104	59.4257	9.30255e-05	1	0	1.50011e-06		0.138552	1518	1.1913e-05		83.5511	59.4257	0	7.76256e-05
	1519	7	121	141.839	0.557545	0.541027	1762	48.8904	6.0193e-05	1	0	1.07983e-06		0.138607	1519	5.5097e-05		92.9484	48.8904	0	5.02283e-05
	1520	7	122	143.27	0.60575	0.587803	1610	42.285	8.75534e-05	1	0	1.70647e-06		0.138821	1520	0.000214108		100.985	42.285	0	7.30594e-05
	1521	7	123	142.824	0.655647	0.636222	1419	33.5207	9.30255e-05	1	0	1.96247e-06		0.138962	1521	0.00014052		109.303	33.5207	0	7.76256e-05
	1522	7	124	139.822	0.714889	0.693709	1122	20.6425	4.92488e-05	1	0	1.13283e-06		0.139094	1522	0.000132033		119.179	20.6425	0	4.10959e-05
	1523	7	125	141.678	0.7718	0.748934	956	13.0116	2.73605e-05	1	0	6.79452e-07		0.139216	1523	0.000121972		128.667	13.0116	0	2.28311e-05
	1524	7	126	142.728	0.8206	0.796288	816	5.92612	5.47209e-05	1	0	1.44483e-06		0.139281	1524	6.51441e-05		136.802	5.92612	0	4.56621e-05
	1525	7	127	141.412	0.8685	0.842769	1	0	3.28325e-05	0	0	0		0.139395	1525	0.000114191		141.412	0	0	2.73973e-05
	1526	7	128	143.456	0.938286	0.910487	1	0	3.83046e-05	0	0	0		0.139449	1526	5.31687e-05		143.456	0	0	3.19635e-05
	1527	7	129	143.297	0.994	0.96455	1	0	2.73605e-05	0	0	0		0.139455	1527	6.41347e-06		143.297	0	0	2.28311e-05
	1528	7	130	149.521	0	0	4907	149.521	0.000333798	1	0	0		0.139466	1528	1.1496e-05		0	149.521	0	0.000278539
	1529	7	131	149.742	0.0256486	0.0248887	4790	145.467	0.000202467	1	0	1.6709e-07		0.139673	1529	0.000206614		4.27589	145.467	1.33227e-14	0.00016895
	1530	7	132	150.706	0.0837358	0.081255	4583	136.747	0.000290021	1	0	7.81397e-07		0.139781	1530	0.00010842		13.9596	136.747	-1.42109e-14	0.000242009
	1531	7	133	150.566	0.13393	0.129962	4306	128.238	0.000311909	1	0	1.34411e-06		0.139909	1531	0.000127412		22.3274	128.238	7.10543e-15	0.000260274
	1532	7	134	150.954	0.1874	0.181848	4115	119.713	0.000246244	1	0	1.48479e-06		0.140044	1532	0.000135602		31.2415	119.713	3.55271e-15	0.000205479
	1533	7	135	151.609	0.2375	0.230463	3870	112.015	0.000175107	1	0	1.33813e-06		0.140162	1533	0.000117703		39.5936	112.015	0	0.000146119
	1534	7	136	150.593	0.2935	0.284804	3559	101.663	0.000153219	1	0	1.44694e-06		0.140213	1534	5.13077e-05		48.9294	101.663	0	0.000127854
	1535	7	137	151.352	0.342488	0.332341	3285	94.2563	0.0002353	1	0	2.59298e-06		0.140276	1535	6.28641e-05		57.0962	94.2563	0	0.000196347
	1536	7	138	150.26	0.396147	0.38441	2927	84.2186	0.000186051	1	0	2.37148e-06		0.140387	1536	0.000110194		66.0417	84.2186	0	0.000155251
	1537	7	139	150.624	0.451	0.437638	2646	75.4378	0.000191523	1	0	2.77926e-06		0.140586	1537	0.000199382		75.1862	75.4378	0	0.000159817
	1538	7	140	150.324	0.50384	0.488912	2324	66.3288	0.000136802	1	0	2.21777e-06		0.140709	1538	0.000122953		83.9952	66.3288	0	0.000114155
	1539	7	141	149.989	0.551333	0.534999	2067	58.0767	3.28325e-05	1	0	5.82438e-07		0.140758	1539	4.9512e-05		91.9128	58.0767	0	2.73973e-05
	1540	7	142	150.834	0.611308	0.593196	1764	48.9228	7.11372e-05	1	0	1.39922e-06		0.140765	1540	6.189e-06		101.911	48.9228	0	5.93607e-05
	1541	7	143	150.73	0.646333	0.627184	1624	42.9797	3.28325e-05	1	0	6.82798e-07		0.141022	1541	0.000257497		107.75	42.9797	0	2.73973e-05
	1542	7	144	151.634	0.709667	0.688641	1413	33.3254	1.64163e-05	1	0	3.74852e-07		0.141033	1542	1.10937e-05		118.309	33.3254	0	1.36986e-05
	1543	7	145	147.687	0.773	0.750098	1088	18.8201	5.47209e-06	1	0	1.36102e-07		0.141074	1543	4.06575e-05		128.867	18.8201	0	4.56621e-06
	1544	7	146	151.495	0.819	0.794735	996	14.9597	2.73605e-05	1	0	7.21005e-07		0.141205	1544	0.000130855		136.535	14.9597	0	2.28311e-05
	1545	7	147	149.936	0.87275	0.846893	787	4.44009	2.18884e-05	1	0	6.14659e-07		0.141309	1545	0.000104625		145.496	4.44009	0	1.82648e-05
	1546	7	148	150.126	0.969	0.940291	1	0	1.09442e-05	0	0	0		0.141423	1546	0.000113584		150.126	0	0	9.13242e-06
	1547	7	149	160.217	0	0	5137	160.217	0.000295493	1	0	0		0.141615	1547	0.000192404		0	160.217	0	0.000246575
	1548	7	150	159.223	0.023	0.0223186	5022	155.389	3.83046e-05	1	0	2.83472e-08		0.141722	1548	0.000106337		3.83433	155.389	-5.32907e-15	3.19635e-05
	1549	7	151	159.405	0.0758214	0.073575	4842	146.764	0.000153219	1	0	3.73796e-07		0.141782	1549	6.06638e-05		12.6402	146.764	0	0.000127854
	1550	7	152	159.512	0.129875	0.126027	4634	137.86	0.00013133	1	0	5.48809e-07		0.14183	1550	4.77791e-05		21.6515	137.86	-3.55271e-15	0.000109589
	1551	7	153	159.325	0.183613	0.178173	4320	128.715	0.000169635	1	0	1.00219e-06		0.141949	1551	0.000118649		30.6101	128.715	1.06581e-14	0.000141553
	1552	7	154	158.13	0.239889	0.232782	4057	118.138	0.000196995	1	0	1.52054e-06		0.142197	1552	0.000248485		39.9919	118.138	0	0.000164384
	1553	7	155	159.159	0.290781	0.282166	3818	110.683	0.000175107	1	0	1.63833e-06		0.142323	1553	0.000126276		48.4761	110.683	-7.10543e-15	0.000146119
	1554	7	156	157.824	0.346273	0.336014	3523	100.097	0.000120386	1	0	1.3413e-06		0.142509	1554	0.00018567		57.7271	100.097	-7.10543e-15	0.000100457
	1555	7	157	157.778	0.401632	0.389732	3182	90.8216	0.00010397	1	0	1.34359e-06		0.142515	1555	5.97238e-06		66.956	90.8216	0	8.6758e-05
	1556	7	158	157.376	0.4458	0.432592	2915	83.0566	0.000109442	1	0	1.56984e-06		0.142526	1556	1.07054e-05		74.3193	83.0566	0	9.13242e-05
	1557	7	159	158.516	0.499	0.484216	2643	75.3282	5.47209e-05	1	0	8.78587e-07		0.142627	1557	0.000100963		83.1883	75.3282	0	4.56621e-05
	1558	7	160	159.935	0.563333	0.546643	2319	66.0215	1.64163e-05	1	0	2.97557e-07		0.142666	1558	3.92345e-05		93.9133	66.0215	0	1.36986e-05
	1559	7	161	158.375	0.612	0.593868	2014	56.3483	1.64163e-05	1	0	3.23264e-07		0.14291	1559	0.000243945		102.027	56.3483	0	1.36986e-05
	1560	7	162	161.812	0.6575	0.63802	1853	52.1997	1.09442e-05	1	0	2.31531e-07		0.142956	1560	4.61068e-05		109.612	52.1997	0	9.13242e-06
	1561	7	163	162.289	0.708	0.687024	1648	44.2581	5.47209e-06	1	0	1.24657e-07		0.143066	1561	0.000109608		118.031	44.2581	0	4.56621e-06
	1562	7	164	157.881	0.7685	0.745731	1322	29.7639	1.09442e-05	1	0	2.70619e-07		0.143168	1562	0.000102615		128.117	29.7639	0	9.13242e-06
	1563	7	165	159.099	0.8245	0.800072	1144	21.647	1.09442e-05	1	0	2.90339e-07		0.143283	1563	0.000114496		137.452	21.647	0	9.13242e-06
	1564	7	166	167.701	0	0	5312	167.701	0.000558153	1	0	0		0.143341	1564	5.85406e-05		0	167.701	0	0.000465753
	1565	7	167	168.938	0.0155641	0.015103	5284	166.343	0.000213412	1	0	1.06874e-07		0.143581	1565	0.000239788		2.59469	166.343	-1.06581e-14	0.000178082
	1566	7	168	168.498	0.07675	0.0744761	5053	155.703	0.000175107	1	0	4.32427e-07		0.14376	1566	0.000179171		12.795	155.703	1.06581e-14	0.000146119
	1567	7	169	167.979	0.129333	0.125502	4829	146.418	0.000147746	1	0	6.14835e-07		0.143882	1567	0.000121856		21.5612	146.418	3.55271e-15	0.000123288
	1568	7	170	166.873	0.185706	0.180204	4554	135.914	0.000186051	1	0	1.1117e-06		0.143889	1568	6.77625e-06		30.959	135.914	0	0.000155251
	1569	7	171	167.446	0.235059	0.228095	4308	128.259	9.30255e-05	1	0	7.03574e-07		0.144124	1569	0.000235407		39.1867	128.259	-1.42109e-14	7.76256e-05
	1570	7	172	167.294	0.290167	0.28157	4097	118.921	0.00013133	1	0	1.22615e-06		0.14423	1570	0.000105772		48.3737	118.921	0	0.000109589
	1571	7	173	168.018	0.337545	0.327545	3860	111.746	6.0193e-05	1	0	6.53746e-07		0.144328	1571	9.74297e-05		56.2722	111.746	-7.10543e-15	5.02283e-05
	1572	7	174	165.211	0.390857	0.379277	3521	100.052	3.83046e-05	1	0	4.81726e-07		0.144438	1572	0.000110489		65.1598	100.052	0	3.19635e-05
	1573	7	175	169.271	0.438	0.425023	3384	96.2519	1.09442e-05	1	0	1.54237e-07		0.144818	1573	0.00037947		73.019	96.2519	0	9.13242e-06
	1574	7	176	168.095	0.502333	0.48745	2953	84.3509	4.92488e-05	1	0	7.9601e-07		0.144828	1574	1.03307e-05		83.744	84.3509	0	4.10959e-05
	1575	7	177	167.408	0.572	0.555053	2540	72.0494	2.73605e-05	1	0	5.03559e-07		0.144866	1575	3.78613e-05		95.3581	72.0494	0	2.28311e-05
	1576	7	178	168.09	0.616	0.597749	2304	65.3964	1.09442e-05	1	0	2.16918e-07		0.144871	1576	5.76335e-06		102.693	65.3964	0	9.13242e-06
	1577	7	179	164.989	0.642	0.622979	2064	57.9608	5.47209e-06	1	0	1.13037e-07		0.14497	1577	9.9024e-05		107.028	57.9608	0	4.56621e-06
	1578	7	180	175.732	0	0	5451	175.732	0.000979504	1	0	0		0.145202	1578	0.000231396		0	175.732	0	0.000817352
	1579	7	181	175.992	0.0167	0.0162052	5425	173.208	0.000766093	1	0	4.11651e-07		0.145375	1579	0.0001729		2.78406	173.208	8.88178e-16	0.000639269
	1580	7	182	175.755	0.0768308	0.0745545	5191	162.946	0.000355686	1	0	8.79291e-07		0.145431	1580	5.64917e-05		12.8085	162.946	1.24345e-14	0.000296804
	1581	7	183	177.01	0.1275	0.123722	5056	155.754	0.00013133	1	0	5.38773e-07		0.145549	1581	0.000117591		21.2555	155.754	1.42109e-14	0.000109589
	1582	7	184	175.128	0.188833	0.183239	4763	143.648	9.84976e-05	1	0	5.9846e-07		0.145776	1582	0.000227168		31.4804	143.648	-7.10543e-15	8.21918e-05
	1583	7	185	176.078	0.243684	0.236464	4540	135.453	0.00010397	1	0	8.15202e-07		0.146142	1583	0.000366189		40.6246	135.453	0	8.6758e-05
	1584	7	186	175.807	0.292143	0.283487	4284	127.104	7.66093e-05	1	0	7.20124e-07		0.146249	1584	0.000106622		48.7031	127.104	7.10543e-15	6.39269e-05
	1585	7	187	175.31	0.3449	0.334681	4051	117.812	5.47209e-05	1	0	6.07264e-07		0.146351	1585	0.00010207		57.4983	117.812	0	4.56621e-05
	1586	7	188	176.994	0.384333	0.372947	3908	112.922	3.28325e-05	1	0	4.06016e-07		0.146574	1586	0.000223297		64.0722	112.922	0	2.73973e-05
	1587	7	189	175.086	0.452	0.438608	3518	99.7335	1.09442e-05	1	0	1.59167e-07		0.146581	1587	6.53908e-06		75.3529	99.7335	0	9.13242e-06
	1588	7	190	175.616	0.5008	0.485963	3227	92.1277	2.73605e-05	1	0	4.40878e-07		0.146675	1588	9.40197e-05		83.4884	92.1277	0	2.28311e-05
	1589	7	191	177.425	0.5524	0.536034	2976	85.3339	2.73605e-05	1	0	4.86304e-07		0.14677	1589	9.55581e-05		92.0906	85.3339	0	2.28311e-05
	1590	7	192	174.325	0.612667	0.594515	2547	72.1876	1.64163e-05	1	0	3.23616e-07		0.14678	1590	9.96912e-06		102.138	72.1876	0	1.36986e-05
	1591	7	193	174.32	0.638	0.619098	2379	67.9592	5.47209e-06	1	0	1.12332e-07		0.146817	1591	3.65361e-05		106.361	67.9592	0	4.56621e-06
	1592	7	194	184.763	0	0	5598	184.763	0.00145558	1	0	0		0.14693	1592	0.000113475		0	184.763	0	0.00121461
	1593	7	195	183.108	0.0169167	0.0164155	5532	180.287	0.000525321	1	0	2.85937e-07		0.146985	1593	5.45145e-05		2.82018	180.287	1.06581e-14	0.000438356
	1594	7	196	184.325	0.0775345	0.0752373	5370	171.399	0.000317381	1	0	7.91785e-07		0.147338	1594	0.000353372		12.9258	171.399	0	0.00026484
	1595	7	197	184.26	0.1245	0.120811	5214	163.505	0.000186051	1	0	7.45302e-07		0.147557	1595	0.000219217		20.7554	163.505	-1.06581e-14	0.000155251
	1596	7	198	184.898	0.183	0.177578	4993	154.39	0.000114914	1	0	6.76635e-07		0.147773	1596	0.000215481		30.5079	154.39	-1.42109e-14	9.58904e-05
	1597	7	199	183.541	0.238889	0.231811	4764	143.716	9.84976e-05	1	0	7.57099e-07		0.147871	1597	9.84976e-05		39.8252	143.716	-1.42109e-14	8.21918e-05
	1598	7	200	183.235	0.2935	0.284804	4476	134.306	2.18884e-05	1	0	2.06706e-07		0.147964	1598	9.22136e-05		48.9294	134.306	-1.42109e-14	1.82648e-05
	1599	7	201	184.653	0.318	0.308578	4424	131.639	5.47209e-06	1	0	5.59901e-08		0.148054	1599	9.0729e-05		53.0138	131.639	-7.10543e-15	4.56621e-06
	1600	7	202	180.366	0.411	0.398823	3865	111.848	5.47209e-06	1	0	7.23646e-08		0.148395	1600	0.000341004		68.5178	111.848	0	4.56621e-06
	1601	7	203	182.571	0.446667	0.433433	3757	108.107	1.64163e-05	1	0	2.35933e-07		0.148505	1601	0.000109504		74.4638	108.107	0	1.36986e-05
	1602	7	204	183.114	0.505667	0.490685	3476	98.814	1.64163e-05	1	0	2.67097e-07		0.148511	1602	6.31021e-06		84.2997	98.814	0	1.36986e-05
	1603	7	205	183.726	0.56	0.543409	3173	90.3684	5.47209e-06	1	0	9.85989e-08		0.148546	1603	3.52574e-05		93.3576	90.3684	0	4.56621e-06
	1604	7	206	192.03	0	0	5661	192.03	0.00128047	1	0	0		0.148556	1604	9.6202e-06		0	192.03	0	0.00106849
	1605	7	207	193.951	0.00839583	0.00814709	5699	192.551	0.00026266	1	0	7.0956e-08		0.148609	1605	5.26065e-05		1.39967	192.551	9.32587e-15	0.000219178
	1606	7	208	193.238	0.0707333	0.0686377	5557	181.446	8.20814e-05	1	0	1.8681e-07		0.14882	1606	0.000211544		11.792	181.446	-1.24345e-14	6.84932e-05
	1607	7	209	193.857	0.132	0.128089	5385	171.851	6.56651e-05	1	0	2.78894e-07		0.149028	1607	0.000207939		22.0057	171.851	1.06581e-14	5.47945e-05
	1608	7	210	194.57	0.183667	0.178225	5232	163.951	3.28325e-05	1	0	1.94029e-07		0.149123	1608	9.50502e-05		30.6191	163.951	1.06581e-14	2.73973e-05
	1609	7	211	192.258	0.226	0.219304	4998	154.581	1.09442e-05	1	0	7.95834e-08		0.149452	1609	0.000329069		37.6765	154.581	-1.42109e-14	9.13242e-06
	1610	7	212	192.907	0.27	0.262001	4884	147.895	5.47209e-06	1	0	4.75388e-08		0.14954	1610	8.75534e-05		45.0117	147.895	0	4.56621e-06
	1611	7	213	190.791	0.456	0.44249	3997	114.771	5.47209e-06	1	0	8.02877e-08		0.14974	1611	0.000200662		76.0198	114.771	0	4.56621e-06
	1612	7	214	200.029	0	0	5751	200.029	0.000585514	1	0	0		0.149945	1612	0.00020414		0	200.029	0	0.000488584
	1613	7	215	199.731	0.0035	0.0033963	5732	199.148	0.000251716	1	0	2.83472e-08		0.149979	1613	3.40234e-05		0.583485	199.148	4.44089e-15	0.000210046
	1614	7	216	201.421	0.0872222	0.084638	5632	186.88	4.92488e-05	1	0	1.38215e-07		0.149988	1614	9.2835e-06		14.5408	186.88	7.10543e-15	4.10959e-05
	1615	7	217	200.136	0.1361	0.132068	5492	177.447	5.47209e-05	1	0	2.39631e-07		0.150039	1615	5.07652e-05		22.6892	177.447	1.42109e-14	4.56621e-05
	1616	7	218	201.582	0.185364	0.179872	5357	170.681	6.0193e-05	1	0	3.59006e-07		0.150045	1616	6.08936e-06		30.902	170.681	-1.42109e-14	5.02283e-05
	1617	7	219	201.223	0.234	0.227067	5177	162.213	2.18884e-05	1	0	1.64801e-07		0.150362	1617	0.000317551		39.0101	162.213	-7.10543e-15	1.82648e-05
	1618	7	220	202.555	0.29	0.281408	4990	154.209	2.73605e-05	1	0	2.55301e-07		0.150454	1618	9.17235e-05		48.3459	154.209	-1.42109e-14	2.28311e-05
	1619	7	221	201.901	0.321	0.31149	4893	148.387	2.73605e-05	1	0	2.82592e-07		0.150648	1619	0.000193638		53.5139	148.387	0	2.28311e-05
	1620	7	222	199.576	0.383667	0.3723	4546	135.614	1.64163e-05	1	0	2.02656e-07		0.150732	1620	8.44891e-05		63.9611	135.614	7.10543e-15	1.36986e-05
	1621	7	223	202.003	0.437	0.424053	4332	129.151	1.64163e-05	1	0	2.30827e-07		0.150929	1621	0.000196995		72.8523	129.151	1.42109e-14	1.36986e-05
	1622	7	224	207.453	0	0	5776	207.453	4.92488e-05	1	0	0		0.151236	1622	0.000306437		0	207.453	0	4.10959e-05
	1623	7	225	209.305	0.00366667	0.00355803	5807	208.694	1.64163e-05	1	0	1.93676e-09		0.151285	1623	4.89885e-05		0.61127	208.694	8.99281e-15	1.36986e-05
	1624	7	226	207.563	0.095	0.0921854	5657	191.725	1.64163e-05	1	0	5.01798e-08		0.151317	1624	3.28325e-05		15.8374	191.725	-3.55271e-15	1.36986e-05
	1625	7	227	206.112	0.138667	0.134558	5582	182.995	1.64163e-05	1	0	7.32449e-08		0.151326	1625	8.95857e-06		23.1171	182.995	1.06581e-14	1.36986e-05
	1626	7	228	207.944	0.186	0.180489	5484	176.936	1.09442e-05	1	0	6.54979e-08		0.151415	1626	8.85131e-05		31.0081	176.936	7.10543e-15	9.13242e-06
	1627	7	229	207.708	0.245125	0.237863	5307	166.843	4.37767e-05	1	0	3.45272e-07		0.151421	1627	5.87623e-06		40.8648	166.843	7.10543e-15	3.65297e-05
	1628	7	230	207.202	0.288875	0.280316	5132	159.044	4.37767e-05	1	0	4.06897e-07		0.151608	1628	0.000186861		48.1584	159.044	-7.10543e-15	3.65297e-05
	1629	7	231	207.379	0.34675	0.336477	4932	149.572	4.37767e-05	1	0	4.88417e-07		0.151903	1629	0.000295712		57.8067	149.572	-7.10543e-15	3.65297e-05
	1630	7	232	206.165	0.4135	0.401249	4604	137.231	1.09442e-05	1	0	1.45609e-07		0.152093	1630	0.0001901		68.9346	137.231	1.42109e-14	9.13242e-06
	1631	7	233	205.187	0.4375	0.424538	4431	132.251	1.09442e-05	1	0	1.54061e-07		0.152175	1631	8.1532e-05		72.9356	132.251	0	9.13242e-06
	1632	8	1	55.303	0	0	1953	55.303	5.28057e-06	1	0	0		0.15246	1632	0.000285362		0	55.303	0	4.56621e-06
	1633	8	2	60.634	0	0	2133	60.634	0.00438815	1	0	0		0.152641	1633	0.000180321		0	60.634	0	0.00379452
	1634	8	3	67.2351	0	0	2340	67.2351	0.00416109	1	0	0		0.152726	1634	8.54152e-05		0	67.2351	0	0.00359817
	1635	8	4	69.6784	0.001	0.000965521	2430	69.5126	5.28057e-06	1	0	1.69058e-10		0.152758	1635	3.16834e-05		0.165876	69.5126	5.13478e-15	4.56621e-06
	1636	8	5	76.2057	0	0	2665	76.2057	0.00291487	1	0	0		0.152766	1636	8.64502e-06		0	76.2057	0	0.00252055
	1637	8	6	76.8501	0.001	0.000965521	2709	76.6843	4.22445e-05	1	0	1.35246e-09		0.15295	1637	0.000183447		0.165876	76.6843	5.13478e-15	3.65297e-05
	1638	8	7	84.2604	0	0	2928	84.2604	0.00140991	1	0	0		0.152956	1638	5.67056e-06		0	84.2604	0	0.00121918
	1639	8	8	91.784	0	0	3198	91.784	0.000543898	1	0	0		0.153034	1639	7.86783e-05		0	91.784	0	0.00047032
	1640	8	9	96.5462	0.247	0.238484	1987	55.5747	5.28057e-06	1	0	4.17572e-08		0.15331	1640	0.000275374		40.9715	55.5747	0	4.56621e-06
	1641	8	10	96.818	0.272	0.262622	1841	51.6996	5.28057e-06	1	0	4.59837e-08		0.153484	1641	0.00017401		45.1184	51.6996	0	4.56621e-06
	1642	8	11	98.8291	0	0	3477	98.8291	2.11223e-05	1	0	0		0.153566	1642	8.24256e-05		0	98.8291	0	1.82648e-05
	1643	8	12	104.212	0.036	0.0347587	3443	98.24	1.58417e-05	1	0	1.82582e-08		0.153661	1643	9.48675e-05		5.97155	98.24	-8.88178e-16	1.36986e-05
	1644	8	13	102.506	0.08652	0.0835368	3078	88.154	0.000132014	1	0	3.65671e-07		0.153838	1644	0.000177026		14.3516	88.154	0	0.000114155
	1645	8	14	103.171	0.134844	0.130194	2861	80.8037	0.000168978	1	0	7.29483e-07		0.153868	1645	3.05745e-05		22.3674	80.8037	-3.55271e-15	0.000146119
	1646	8	15	102.046	0.184958	0.178581	2514	71.3657	0.000126734	1	0	7.50446e-07		0.154134	1646	0.000265736		30.6802	71.3657	-3.55271e-15	0.000109589
	1647	8	16	102.431	0.2419	0.233559	2207	62.3059	0.000105611	1	0	8.179e-07		0.154302	1647	0.000167919		40.1255	62.3059	0	9.13242e-05
	1648	8	17	102.705	0.289714	0.279725	1927	54.6479	7.39279e-05	1	0	6.85697e-07		0.154308	1648	5.47209e-06		48.0568	54.6479	0	6.39269e-05
	1649	8	18	101.823	0.336357	0.32476	1683	46.0291	7.39279e-05	1	0	7.96092e-07		0.154384	1649	7.59246e-05		55.7937	46.0291	0	6.39269e-05
	1650	8	19	101.584	0.402625	0.388743	1450	34.7985	8.44891e-05	1	0	1.08907e-06		0.154475	1650	9.15471e-05		66.786	34.7985	0	7.30594e-05
	1651	8	20	102.953	0.44596	0.430584	1306	28.979	0.000132014	1	0	1.88482e-06		0.154555	1651	7.95407e-05		73.9743	28.979	0	0.000114155
	1652	8	21	102.19	0.49195	0.474988	1121	20.5869	0.000105611	1	0	1.66336e-06		0.154811	1652	0.000256435		81.6029	20.5869	0	9.13242e-05
	1653	8	22	102.203	0.552833	0.533772	911	10.5005	6.33668e-05	1	0	1.12153e-06		0.154982	1653	0.00017083		91.702	10.5005	0	5.47945e-05
	1654	8	23	103.835	0.617	0.595726	738	1.48919	2.64028e-05	1	0	5.21543e-07		0.155144	1654	0.000162042		102.346	1.48919	0	2.28311e-05
	1655	8	24	102.801	0.6566	0.633961	1	0	2.64028e-05	0	0	0		0.155173	1655	2.95044e-05		102.801	0	0	2.28311e-05
	1656	8	25	103.461	0.713667	0.68906	1	0	1.58417e-05	0	0	0		0.155262	1656	8.8343e-05		103.461	0	0	1.36986e-05
	1657	8	26	102.228	0.755667	0.729612	1	0	4.75251e-05	0	0	0		0.155509	1657	0.00024746		102.228	0	0	4.10959e-05
	1658	8	27	102.221	0.813667	0.785612	1	0	1.58417e-05	0	0	0		0.155582	1658	7.32672e-05		102.221	0	0	1.36986e-05
	1659	8	28	101.688	0.925	0.893107	1	0	5.28057e-06	0	0	0		0.155588	1659	5.28057e-06		101.688	0	0	4.56621e-06
	1660	8	29	102.947	0.981	0.947176	1	0	1.05611e-05	0	0	0		0.155665	1660	7.67568e-05		102.947	0	0	9.13242e-06
	1661	8	30	110.646	0	0	3791	110.646	0.000227064	1	0	0		0.155829	1661	0.000164851		0	110.646	0	0.000196347
	1662	8	31	109.769	0.0178551	0.0172394	3736	106.807	0.000364359	1	0	2.08279e-07		0.155915	1662	8.5251e-05		2.96174	106.807	3.55271e-15	0.000315068
	1663	8	32	109.082	0.0840333	0.0811359	3328	95.1429	0.000316834	1	0	8.52388e-07		0.156071	1663	0.000156371		13.9392	95.1429	-3.55271e-15	0.000273973
	1664	8	33	109.423	0.128574	0.124141	3076	88.0955	0.000285151	1	0	1.17377e-06		0.15631	1664	0.000238799		21.3274	88.0955	0	0.000246575
	1665	8	34	108.741	0.183067	0.176755	2778	78.3748	0.000237626	1	0	1.3927e-06		0.156338	1665	2.84717e-05		30.3664	78.3748	0	0.000205479
	1666	8	35	108.805	0.237548	0.229358	2420	69.4009	0.000163698	1	0	1.24494e-06		0.156421	1666	8.22672e-05		39.4037	69.4009	0	0.000141553
	1667	8	36	109.298	0.295351	0.285168	2125	60.3063	0.000195381	1	0	1.84746e-06		0.15658	1667	0.000159081		48.9918	60.3063	0	0.00016895
	1668	8	37	109.847	0.342787	0.330968	1874	52.9866	0.000248187	1	0	2.72369e-06		0.15665	1668	7.07029e-05		56.8603	52.9866	0	0.000214612
	1669	8	38	109.33	0.399018	0.38526	1629	43.1422	0.000295712	1	0	3.77759e-06		0.156724	1669	7.40703e-05		66.1877	43.1422	0	0.000255708
	1670	8	39	110.062	0.45425	0.438588	1447	34.7127	0.000316834	1	0	4.60766e-06		0.156875	1670	0.000150898		75.3494	34.7127	0	0.000273973
	1671	8	40	109.772	0.49622	0.47911	1279	27.4613	0.000216503	1	0	3.43948e-06		0.157106	1671	0.000230441		82.3111	27.4613	0	0.000187215
	1672	8	41	110.381	0.552314	0.533271	1086	18.7651	0.00018482	1	0	3.26805e-06		0.157111	1672	5.09575e-06		91.6159	18.7651	0	0.000159817
	1673	8	42	109.353	0.608087	0.587121	872	8.48588	0.000121453	1	0	2.36444e-06		0.15719	1673	7.93878e-05		100.867	8.48588	0	0.000105023
	1674	8	43	110.156	0.6545	0.631933	740	1.59019	0.000116172	1	0	2.43426e-06		0.157218	1674	2.74752e-05		108.566	1.59019	0	0.000100457
	1675	8	44	109.447	0.717048	0.692324	1	0	0.000110892	0	0	0		0.157363	1675	0.000145616		109.447	0	0	9.58904e-05
	1676	8	45	110.025	0.768773	0.742266	1	0	0.000116172	0	0	0		0.157517	1676	0.000153514		110.025	0	0	0.000100457
	1677	8	46	110.547	0.819667	0.791405	1	0	0.000142575	0	0	0		0.157739	1677	0.000222376		110.547	0	0	0.000123288
	1678	8	47	110.378	0.87832	0.848036	1	0	0.000132014	0	0	0		0.157816	1678	7.66093e-05		110.378	0	0	0.000114155
	1679	8	48	110.244	0.922417	0.890612	1	0	6.33668e-05	0	0	0		0.157887	1679	7.14779e-05		110.244	0	0	5.47945e-05
	1680	8	49	110.88	0.980643	0.946831	1	0	7.39279e-05	0	0	0		0.157956	1680	6.82283e-05		110.88	0	0	6.39269e-05
	1681	8	50	118.816	0	0	4070	118.816	0.000211223	1	0	0		0.158044	1681	8.80912e-05		0	118.816	0	0.000182648
	1682	8	51	117.125	0.0209362	0.0202143	3944	113.652	0.000248187	1	0	1.66353e-07		0.158049	1682	4.9174e-06		3.47282	113.652	6.21725e-15	0.000214612
	1683	8	52	116.764	0.090375	0.0872589	3563	101.773	8.44891e-05	1	0	2.44457e-07		0.158122	1683	7.39279e-05		14.9911	101.773	-7.10543e-15	7.30594e-05
	1684	8	53	116.425	0.135152	0.130492	3274	94.0061	0.000174259	1	0	7.53997e-07		0.158263	1684	0.00014052		22.4185	94.0061	-3.55271e-15	0.000150685
	1685	8	54	116.405	0.183828	0.177489	2992	85.9122	0.000153136	1	0	9.01246e-07		0.158338	1685	7.45387e-05		30.4927	85.9122	0	0.00013242
	1686	8	55	117.346	0.240125	0.231846	2750	77.5145	0.000126734	1	0	9.74279e-07		0.158552	1686	0.000214592		39.8311	77.5145	0	0.000109589
	1687	8	56	117.873	0.2916	0.281546	2422	69.503	0.000211223	1	0	1.97189e-06		0.1587	1687	0.000148141		48.3696	69.503	0	0.000182648
	1688	8	57	117.516	0.343423	0.331582	2129	60.5499	0.00027459	1	0	3.01903e-06		0.158727	1688	2.65136e-05		56.9658	60.5499	0	0.000237443
	1689	8	58	116.704	0.39795	0.384229	1813	50.6933	0.000211223	1	0	2.69106e-06		0.158796	1689	6.89761e-05		66.0105	50.6933	0	0.000182648
	1690	8	59	117.607	0.453684	0.438041	1611	42.3519	0.000200662	1	0	2.91455e-06		0.158862	1690	6.58403e-05		75.2555	42.3519	0	0.000173516
	1691	8	60	117.292	0.499838	0.482604	1441	34.3811	0.000195381	1	0	3.12655e-06		0.158933	1691	7.13405e-05		82.9113	34.3811	0	0.00016895
	1692	8	61	117.694	0.55325	0.534174	1247	25.9231	0.000168978	1	0	2.99299e-06		0.159018	1692	8.50081e-05		91.7711	25.9231	0	0.000146119
	1693	8	62	118.274	0.60769	0.586738	1058	17.4726	0.000221784	1	0	4.31486e-06		0.159225	1693	0.000207082		100.802	17.4726	0	0.000191781
	1694	8	63	118.248	0.66025	0.637485	877	8.72845	0.000147856	1	0	3.12537e-06		0.159361	1694	0.000135602		109.52	8.72845	0	0.000127854
	1695	8	64	117.696	0.715436	0.690768	1	0	0.000205942	0	0	0		0.159504	1695	0.000142956		117.696	0	0	0.000178082
	1696	8	65	116.683	0.76525	0.738865	1	0	0.000168978	0	0	0		0.159575	1696	7.19299e-05		116.683	0	0	0.000146119
	1697	8	66	118.418	0.820378	0.792092	1	0	0.000237626	0	0	0		0.159644	1697	6.88435e-05		118.418	0	0	0.000205479
	1698	8	67	117.778	0.874857	0.844693	1	0	0.000147856	0	0	0		0.159649	1698	4.74529e-06		117.778	0	0	0.000127854
	1699	8	68	118.151	0.928135	0.896134	1	0	0.000195381	0	0	0		0.159716	1699	6.6562e-05		118.151	0	0	0.00016895
	1700	8	69	117.277	0.980464	0.946659	1	0	0.000147856	0	0	0		0.159915	1700	0.000199834		117.277	0	0	0.000127854
	1701	8	70	126.34	0	0	4254	126.34	0.000501654	1	0	0		0.159941	1701	2.55856e-05		0	126.34	0	0.00043379
	1702	8	71	124.182	0.0251429	0.0242759	4128	120.012	7.39279e-05	1	0	5.95083e-08		0.160005	1702	6.35359e-05		4.17061	120.012	-8.88178e-16	6.39269e-05
	1703	8	72	125.135	0.0906667	0.0875405	3776	110.096	1.58417e-05	1	0	4.59837e-08		0.160135	1703	0.000130855		15.0395	110.096	-5.32907e-15	1.36986e-05
	1704	8	73	125.637	0.130727	0.12622	3644	103.952	5.80862e-05	1	0	2.43105e-07		0.160217	1704	8.20328e-05		21.6846	103.952	-3.55271e-15	5.02283e-05
	1705	8	74	125.396	0.185417	0.179024	3300	94.6401	0.000126734	1	0	7.52306e-07		0.160284	1705	6.6434e-05		30.7563	94.6401	-3.55271e-15	0.000109589
	1706	8	75	126.125	0.23928	0.23103	3008	86.4345	0.000132014	1	0	1.0113e-06		0.160422	1706	0.000137952		39.6909	86.4345	-7.10543e-15	0.000114155
	1707	8	76	124.62	0.293667	0.283541	2656	75.9073	0.0001901	1	0	1.78728e-06		0.160615	1707	0.00019284		48.7124	75.9073	7.10543e-15	0.000164384
	1708	8	77	126.205	0.342775	0.330956	2419	69.3464	0.000211223	1	0	2.31795e-06		0.160684	1708	6.94123e-05		56.8583	69.3464	0	0.000182648
	1709	8	78	125.744	0.39875	0.385001	2109	59.6004	0.000168978	1	0	2.15717e-06		0.160748	1709	6.42323e-05		66.1432	59.6004	0	0.000146119
	1710	8	79	125.514	0.450077	0.434559	1818	50.8568	0.000137295	1	0	1.97831e-06		0.160875	1710	0.000126276		74.6572	50.8568	0	0.000118721
	1711	8	80	126.28	0.50075	0.483484	1630	43.2173	0.0001901	1	0	3.0476e-06		0.160939	1711	6.41088e-05		83.0626	43.2173	0	0.000164384
	1712	8	81	126.137	0.553447	0.534365	1438	34.3335	0.000200662	1	0	3.55545e-06		0.160943	1712	4.5792e-06		91.8039	34.3335	0	0.000173516
	1713	8	82	125.777	0.610903	0.58984	1211	24.4425	0.000163698	1	0	3.20161e-06		0.160968	1713	2.46901e-05		101.334	24.4425	0	0.000141553
	1714	8	83	125.425	0.659683	0.636937	1022	15.9991	0.000216503	1	0	4.5725e-06		0.161029	1714	6.13121e-05		109.426	15.9991	0	0.000187215
	1715	8	84	126.231	0.710953	0.68644	867	8.30053	0.000227064	1	0	5.16826e-06		0.161162	1715	0.000133124		117.93	8.30053	0	0.000196347
	1716	8	85	125.541	0.768714	0.74221	1	0	0.000147856	0	0	0		0.161284	1716	0.000121972		125.541	0	0	0.000127854
	1717	8	86	125.729	0.816913	0.788746	1	0	0.000121453	0	0	0		0.161471	1717	0.00018609		125.729	0	0	0.000105023
	1718	8	87	126.192	0.871	0.840968	1	0	9.50502e-05	0	0	0		0.16155	1718	7.91616e-05		126.192	0	0	8.21918e-05
	1719	8	88	125.103	0.926333	0.894394	1	0	0.000158417	0	0	0		0.161612	1719	6.1865e-05		125.103	0	0	0.000136986
	1720	8	89	125.75	0.9791	0.945341	1	0	0.000105611	0	0	0		0.161733	1720	0.000121856		125.75	0	0	9.13242e-05
	1721	8	90	134.327	0	0	4479	134.327	0.000950502	1	0	0		0.1618	1721	6.69829e-05		0	134.327	0	0.000821918
	1722	8	91	136.75	0.0153438	0.0148147	4465	134.205	0.000168978	1	0	8.30073e-08		0.161862	1722	6.19842e-05		2.54517	134.205	-3.9968e-15	0.000146119
	1723	8	92	136.469	0.0724118	0.0699151	4233	124.458	8.97696e-05	1	0	2.0811e-07		0.162042	1723	0.000179577		12.0114	124.458	5.32907e-15	7.76256e-05
	1724	8	93	134.546	0.135733	0.131053	3872	112.031	7.92085e-05	1	0	3.44201e-07		0.16217	1724	0.000128465		22.515	112.031	0	6.84932e-05
	1725	8	94	135.385	0.189214	0.18269	3645	103.999	7.39279e-05	1	0	4.47833e-07		0.16223	1725	5.96997e-05		31.3862	103.999	-3.55271e-15	6.39269e-05
	1726	8	95	134.573	0.25	0.24138	3244	93.1036	7.92085e-05	1	0	6.33966e-07		0.162289	1726	5.91662e-05		41.4691	93.1036	7.10543e-15	6.84932e-05
	1727	8	96	134.833	0.29132	0.281275	3010	86.5099	0.000132014	1	0	1.23125e-06		0.162313	1727	2.3826e-05		48.3231	86.5099	0	0.000114155
	1728	8	97	134.181	0.345154	0.333253	2732	76.9277	0.000137295	1	0	1.51712e-06		0.162431	1728	0.000117703		57.2529	76.9277	7.10543e-15	0.000118721
	1729	8	98	135.806	0.404889	0.390929	2398	68.6442	9.50502e-05	1	0	1.23209e-06		0.162435	1729	4.41893e-06		67.1615	68.6442	0	8.21918e-05
	1730	8	99	134.166	0.447375	0.43195	2117	59.9568	8.44891e-05	1	0	1.21011e-06		0.162553	1730	0.000117591		74.209	59.9568	0	7.30594e-05
	1731	8	100	134.177	0.505611	0.488178	1802	50.3082	9.50502e-05	1	0	1.53859e-06		0.162629	1731	7.6391e-05		83.869	50.3082	0	8.21918e-05
	1732	8	101	134.205	0.555056	0.535918	1608	42.1348	9.50502e-05	1	0	1.68905e-06		0.162802	1732	0.000173292		92.0706	42.1348	0	8.21918e-05
	1733	8	102	134.126	0.606406	0.585498	1420	33.5376	0.000168978	1	0	3.28056e-06		0.162862	1733	5.98147e-05		100.589	33.5376	0	0.000146119
	1734	8	103	133.839	0.657083	0.634428	1219	24.8442	0.000126734	1	0	2.66604e-06		0.16292	1734	5.76103e-05		108.995	24.8442	0	0.000109589
	1735	8	104	132.593	0.706895	0.682521	1004	15.336	0.000100331	1	0	2.27061e-06		0.162985	1735	6.46385e-05		117.257	15.336	0	8.6758e-05
	1736	8	105	134.937	0.769944	0.743397	842	7.22113	9.50502e-05	1	0	2.34297e-06		0.163109	1736	0.000123968		127.716	7.22113	0	8.21918e-05
	1737	8	106	134.452	0.825083	0.796635	1	0	0.000126734	0	0	0		0.163222	1737	0.000113475		134.452	0	0	0.000109589
	1738	8	107	133.689	0.8768	0.846569	1	0	5.28057e-05	0	0	0		0.163336	1738	0.000113584		133.689	0	0	4.56621e-05
	1739	8	108	134.382	0.930111	0.898041	1	0	9.50502e-05	0	0	0		0.163393	1739	5.70954e-05		134.382	0	0	8.21918e-05
	1740	8	109	134.432	0.9891	0.954996	1	0	5.28057e-05	0	0	0		0.163569	1740	0.000176182		134.432	0	0	4.56621e-05
	1741	8	110	142.322	0	0	4723	142.322	0.00102443	1	0	0		0.163624	1741	5.55939e-05		0	142.322	0	0.000885845
	1742	8	111	142.163	0.0132235	0.0127676	4694	139.97	0.000897696	1	0	3.80041e-07		0.163792	1742	0.000167227		2.19347	139.97	1.77636e-15	0.000776256
	1743	8	112	142.825	0.0753415	0.0727437	4375	130.327	0.000216503	1	0	5.22219e-07		0.163815	1743	2.2992e-05		12.4974	130.327	-3.55271e-15	0.000187215
	1744	8	113	143.775	0.133	0.128414	4192	121.714	0.0001901	1	0	8.09448e-07		0.163819	1744	4.26427e-06		22.0616	121.714	3.55271e-15	0.000164384
	1745	8	114	142.756	0.18681	0.180368	3862	111.768	0.000110892	1	0	6.63213e-07		0.16409	1745	0.00027105		30.9873	111.768	3.55271e-15	9.58904e-05
	1746	8	115	142.655	0.238765	0.230532	3612	103.05	8.97696e-05	1	0	6.86205e-07		0.164148	1746	5.77212e-05		39.6054	103.05	0	7.76256e-05
	1747	8	116	142.988	0.290258	0.28025	3311	94.8414	0.000163698	1	0	1.52118e-06		0.164221	1747	7.37173e-05		48.147	94.8414	0	0.000141553
	1748	8	117	142.957	0.339292	0.327593	3014	86.6769	0.000126734	1	0	1.37664e-06		0.164284	1748	6.23762e-05		56.2805	86.6769	0	0.000109589
	1749	8	118	143.236	0.395444	0.38181	2754	77.6411	0.000142575	1	0	1.80503e-06		0.164403	1749	0.000119629		65.5949	77.6411	0	0.000123288
	1750	8	119	143.03	0.447333	0.43191	2404	68.8277	0.000142575	1	0	2.04188e-06		0.164457	1750	5.36481e-05		74.2021	68.8277	0	0.000123288
	1751	8	120	142.977	0.501176	0.483896	2113	59.8434	8.97696e-05	1	0	1.44037e-06		0.164567	1751	0.000109504		83.1334	59.8434	0	7.76256e-05
	1752	8	121	141.839	0.557545	0.538322	1775	49.3551	5.80862e-05	1	0	1.03683e-06		0.164728	1752	0.000161374		92.4837	49.3551	0	5.02283e-05
	1753	8	122	143.27	0.60575	0.584864	1620	42.7899	8.44891e-05	1	0	1.63851e-06		0.164898	1753	0.000170016		100.48	42.7899	0	7.30594e-05
	1754	8	123	142.824	0.655647	0.633041	1434	34.0672	8.97696e-05	1	0	1.88432e-06		0.165008	1754	0.000109608		108.756	34.0672	0	7.76256e-05
	1755	8	124	139.822	0.714889	0.69024	1134	21.2384	4.75251e-05	1	0	1.08772e-06		0.165063	1755	5.5097e-05		118.583	21.2384	0	4.10959e-05
	1756	8	125	141.678	0.7718	0.745189	968	13.6549	2.64028e-05	1	0	6.52393e-07		0.165324	1756	0.000261563		128.023	13.6549	0	2.28311e-05
	1757	8	126	142.728	0.8206	0.792306	831	6.61013	5.28057e-05	1	0	1.38729e-06		0.165376	1757	5.17704e-05		136.118	6.61013	0	4.56621e-05
	1758	8	127	141.412	0.8685	0.838555	1	0	3.16834e-05	0	0	0		0.165398	1758	2.21873e-05		141.412	0	0	2.73973e-05
	1759	8	128	143.456	0.938286	0.905934	1	0	3.6964e-05	0	0	0		0.165454	1759	5.5701e-05		143.456	0	0	3.19635e-05
	1760	8	129	143.297	0.994	0.959728	1	0	2.64028e-05	0	0	0		0.165569	1760	0.000115442		143.297	0	0	2.28311e-05
	1761	8	130	149.521	0	0	4907	149.521	0.000322115	1	0	0		0.165583	1761	1.35525e-05		0	149.521	0	0.000278539
	1762	8	131	149.742	0.0256486	0.0247643	4793	145.488	0.000195381	1	0	1.60436e-07		0.165643	1762	6.0193e-05		4.25451	145.488	-1.77636e-15	0.00016895
	1763	8	132	150.706	0.0837358	0.0808487	4584	136.816	0.00027987	1	0	7.50277e-07		0.165647	1763	4.11502e-06		13.8898	136.816	-1.06581e-14	0.000242009
	1764	8	133	150.566	0.13393	0.129312	4310	128.35	0.000300992	1	0	1.29059e-06		0.165718	1764	7.11372e-05		22.2158	128.35	-1.06581e-14	0.000260274
	1765	8	134	150.954	0.1874	0.180939	4118	119.869	0.000237626	1	0	1.42566e-06		0.165882	1765	0.000164066		31.0852	119.869	0	0.000205479
	1766	8	135	151.609	0.2375	0.229311	3878	112.213	0.000168978	1	0	1.28484e-06		0.166135	1766	0.000252409		39.3957	112.213	-7.10543e-15	0.000146119
	1767	8	136	150.593	0.2935	0.28338	3568	101.908	0.000147856	1	0	1.38931e-06		0.166185	1767	4.99585e-05		48.6847	101.908	-7.10543e-15	0.000127854
	1768	8	137	151.352	0.342488	0.33068	3296	94.5417	0.000227064	1	0	2.48971e-06		0.166291	1768	0.000105772		56.8108	94.5417	0	0.000196347
	1769	8	138	150.26	0.396147	0.382488	2956	84.5488	0.000179539	1	0	2.27704e-06		0.166344	1769	5.31687e-05		65.7115	84.5488	0	0.000155251
	1770	8	139	150.624	0.451	0.43545	2655	75.8137	0.00018482	1	0	2.66857e-06		0.166397	1770	5.37514e-05		74.8103	75.8137	0	0.000159817
	1771	8	140	150.324	0.50384	0.486468	2332	66.7488	0.000132014	1	0	2.12945e-06		0.166509	1771	0.000111402		83.5752	66.7488	0	0.000114155
	1772	8	141	149.989	0.551333	0.532324	2079	58.5362	3.16834e-05	1	0	5.59242e-07		0.16653	1772	2.14108e-05		91.4532	58.5362	0	2.73973e-05
	1773	8	142	150.834	0.611308	0.59023	1778	49.4323	6.86474e-05	1	0	1.3435e-06		0.166578	1773	4.82099e-05		101.402	49.4323	0	5.93607e-05
	1774	8	143	150.73	0.646333	0.624048	1635	43.5185	3.16834e-05	1	0	6.55605e-07		0.166737	1774	0.000158323		107.211	43.5185	0	2.73973e-05
	1775	8	144	151.634	0.709667	0.685198	1429	33.917	1.58417e-05	1	0	3.59924e-07		0.166795	1775	5.80862e-05		117.717	33.917	0	1.36986e-05
	1776	8	145	147.687	0.773	0.746347	1100	19.4645	5.28057e-06	1	0	1.30681e-07		0.167038	1776	0.000243574		128.222	19.4645	0	4.56621e-06
	1777	8	146	151.495	0.819	0.790761	1012	15.6424	2.64028e-05	1	0	6.92291e-07		0.167052	1777	1.30782e-05		135.853	15.6424	0	2.28311e-05
	1778	8	147	149.936	0.87275	0.842658	800	5.16757	2.11223e-05	1	0	5.9018e-07		0.16712	1778	6.86474e-05		144.769	5.16757	0	1.82648e-05
	1779	8	148	150.126	0.969	0.93559	1	0	1.05611e-05	0	0	0		0.167222	1779	0.00010207		150.126	0	0	9.13242e-06
	1780	8	149	160.217	0	0	5137	160.217	0.000285151	1	0	0		0.167226	1780	3.97099e-06		0	160.217	0	0.000246575
	1781	8	150	159.223	0.023	0.022207	5024	155.408	3.6964e-05	1	0	2.72183e-08		0.167273	1781	4.65226e-05		3.81516	155.408	-1.02141e-14	3.19635e-05
	1782	8	151	159.405	0.0758214	0.0732072	4844	146.828	0.000147856	1	0	3.58909e-07		0.167324	1782	5.13077e-05		12.577	146.828	-8.88178e-15	0.000127854
	1783	8	152	159.512	0.129875	0.125397	4640	137.969	0.000126734	1	0	5.26952e-07		0.167432	1783	0.000107503		21.5432	137.969	3.55271e-15	0.000109589
	1784	8	153	159.325	0.183613	0.177282	4325	128.868	0.000163698	1	0	9.62276e-07		0.167483	1784	5.18701e-05		30.4571	128.868	-1.06581e-14	0.000141553
	1785	8	154	158.13	0.239889	0.231618	4060	118.338	0.0001901	1	0	1.45998e-06		0.167718	1785	0.000235049		39.7919	118.338	7.10543e-15	0.000164384
	1786	8	155	159.159	0.290781	0.280755	3827	110.926	0.000168978	1	0	1.57308e-06		0.167871	1786	0.000152782		48.2338	110.926	7.10543e-15	0.000146119
	1787	8	156	157.824	0.346273	0.334333	3528	100.386	0.000116172	1	0	1.28788e-06		0.167892	1787	2.06614e-05		57.4385	100.386	7.10543e-15	0.000100457
	1788	8	157	157.778	0.401632	0.387784	3187	91.1563	0.000100331	1	0	1.29008e-06		0.167937	1788	4.48943e-05		66.6212	91.1563	0	8.6758e-05
	1789	8	158	157.376	0.4458	0.430429	2918	83.4282	0.000105611	1	0	1.50732e-06		0.167993	1789	5.60532e-05		73.9477	83.4282	0	9.13242e-05
	1790	8	159	158.516	0.499	0.481795	2652	75.7441	5.28057e-05	1	0	8.43597e-07		0.168091	1790	9.84976e-05		82.7723	75.7441	0	4.56621e-05
	1791	8	160	159.935	0.563333	0.54391	2327	66.491	1.58417e-05	1	0	2.85707e-07		0.168158	1791	6.62447e-05		93.4437	66.491	0	1.36986e-05
	1792	8	161	158.375	0.612	0.590899	2029	56.8585	1.58417e-05	1	0	3.1039e-07		0.16817	1792	1.26204e-05		101.516	56.8585	0	1.36986e-05
	1793	8	162	161.812	0.6575	0.63483	1867	52.7478	1.05611e-05	1	0	2.22311e-07		0.168274	1793	0.00010374		109.064	52.7478	0	9.13242e-06
	1794	8	163	162.289	0.708	0.683589	1659	44.8482	5.28057e-06	1	0	1.19693e-07		0.168501	1794	0.000226822		117.441	44.8482	0	4.56621e-06
	1795	8	164	157.881	0.7685	0.742003	1337	30.4045	1.05611e-05	1	0	2.59841e-07		0.168505	1795	3.83201e-06		127.476	30.4045	0	9.13242e-06
	1796	8	165	159.099	0.8245	0.796072	1158	22.3342	1.05611e-05	1	0	2.78776e-07		0.168554	1796	4.9512e-05		136.765	22.3342	0	9.13242e-06
	1797	8	166	167.701	0	0	5312	167.701	0.000538618	1	0	0		0.168597	1797	4.3323e-05		0	167.701	0	0.000465753
	1798	8	167	168.938	0.0155641	0.0150275	5285	166.356	0.000205942	1	0	1.02618e-07		0.168604	1798	6.77625e-06		2.58172	166.356	1.11022e-14	0.000178082
	1799	8	168	168.498	0.07675	0.0741037	5057	155.767	0.000168978	1	0	4.15205e-07		0.168752	1799	0.000147435		12.731	155.767	-1.06581e-14	0.000146119
	1800	8	169	167.979	0.129333	0.124874	4833	146.526	0.000142575	1	0	5.90349e-07		0.168806	1800	5.40914e-05		21.4534	146.526	1.06581e-14	0.000123288
	1801	8	170	166.873	0.185706	0.179303	4559	136.069	0.000179539	1	0	1.06743e-06		0.168826	1801	1.99382e-05		30.8042	136.069	-7.10543e-15	0.000155251
	1802	8	171	167.446	0.235059	0.226954	4313	128.455	8.97696e-05	1	0	6.75554e-07		0.168921	1802	9.50502e-05		38.9907	128.455	7.10543e-15	7.76256e-05
	1803	8	172	167.294	0.290167	0.280162	4102	119.163	0.000126734	1	0	1.17732e-06		0.168927	1803	6.53908e-06		48.1318	119.163	7.10543e-15	0.000109589
	1804	8	173	168.018	0.337545	0.325907	3871	112.028	5.80862e-05	1	0	6.27711e-07		0.168969	1804	4.18067e-05		55.9908	112.028	-7.10543e-15	5.02283e-05
	1805	8	174	165.211	0.390857	0.377381	3527	100.377	3.6964e-05	1	0	4.62541e-07		0.169188	1805	0.000218884		64.834	100.377	0	3.19635e-05
	1806	8	175	169.271	0.438	0.422898	3398	96.617	1.05611e-05	1	0	1.48094e-07		0.169252	1806	6.39262e-05		72.6539	96.617	0	9.13242e-06
	1807	8	176	168.095	0.502333	0.485013	2958	84.7696	4.75251e-05	1	0	7.64309e-07		0.169394	1807	0.000142274		83.3253	84.7696	0	4.10959e-05
	1808	8	177	167.408	0.572	0.552278	2559	72.5262	2.64028e-05	1	0	4.83505e-07		0.169442	1808	4.77791e-05		94.8813	72.5262	0	2.28311e-05
	1809	8	178	168.09	0.616	0.594761	2316	65.9099	1.05611e-05	1	0	2.08279e-07		0.169454	1809	1.21787e-05		102.18	65.9099	0	9.13242e-06
	1810	8	179	164.989	0.642	0.619864	2077	58.496	5.28057e-06	1	0	1.08535e-07		0.16946	1810	6.31021e-06		106.493	58.496	0	4.56621e-06
	1811	8	180	175.732	0	0	5451	175.732	0.000945222	1	0	0		0.169501	1811	4.03434e-05		0	175.732	0	0.000817352
	1812	8	181	175.992	0.0167	0.0161242	5426	173.222	0.000739279	1	0	3.95257e-07		0.169504	1812	3.69789e-06		2.77014	173.222	1.42109e-14	0.000639269
	1813	8	182	175.755	0.0768308	0.0741817	5195	163.01	0.000343237	1	0	8.44273e-07		0.169716	1813	0.000211223		12.7444	163.01	-8.88178e-15	0.000296804
	1814	8	183	177.01	0.1275	0.123104	5059	155.861	0.000126734	1	0	5.17316e-07		0.169807	1814	9.17235e-05		21.1492	155.861	-3.55271e-15	0.000109589
	1815	8	184	175.128	0.188833	0.182322	4765	143.805	9.50502e-05	1	0	5.74627e-07		0.16986	1815	5.21982e-05		31.323	143.805	-7.10543e-15	8.21918e-05
	1816	8	185	176.078	0.243684	0.235282	4547	135.656	0.000100331	1	0	7.82736e-07		0.169879	1816	1.92404e-05		40.4215	135.656	-7.10543e-15	8.6758e-05
	1817	8	186	175.807	0.292143	0.28207	4287	127.347	7.39279e-05	1	0	6.91445e-07		0.169885	1817	6.08936e-06		48.4596	127.347	0	6.39269e-05
	1818	8	187	175.31	0.3449	0.333008	4055	118.1	5.28057e-05	1	0	5.83079e-07		0.170022	1818	0.000137295		57.2108	118.1	-7.10543e-15	4.56621e-05
	1819	8	188	176.994	0.384333	0.371082	3921	113.242	3.16834e-05	1	0	3.89847e-07		0.170084	1819	6.16887e-05		63.7518	113.242	-7.10543e-15	2.73973e-05
	1820	8	189	175.086	0.452	0.436415	3524	100.11	1.05611e-05	1	0	1.52828e-07		0.170402	1820	0.000318484		74.9762	100.11	0	9.13242e-06
	1821	8	190	175.616	0.5008	0.483533	3235	92.5451	2.64028e-05	1	0	4.2332e-07		0.170449	1821	4.61068e-05		83.0709	92.5451	0	2.28311e-05
	1822	8	191	177.425	0.5524	0.533354	2988	85.7944	2.64028e-05	1	0	4.66937e-07		0.170454	1822	5.87623e-06		91.6301	85.7944	0	2.28311e-05
	1823	8	192	174.325	0.612667	0.591542	2566	72.6983	1.58417e-05	1	0	3.10728e-07		0.170658	1823	0.00020383		101.627	72.6983	0	1.36986e-05
	1824	8	193	174.32	0.638	0.616002	2395	68.491	5.28057e-06	1	0	1.07859e-07		0.17067	1824	1.17525e-05		105.829	68.491	0	4.56621e-06
	1825	8	194	184.763	0	0	5598	184.763	0.00140463	1	0	0		0.170759	1825	8.85131e-05		0	184.763	0	0.00121461
	1826	8	195	183.108	0.0169167	0.0163334	5533	180.302	0.000506934	1	0	2.74549e-07		0.170762	1826	3.56846e-06		2.80608	180.302	-7.54952e-15	0.000438356
	1827	8	196	184.325	0.0775345	0.0748611	5373	171.464	0.000306273	1	0	7.60252e-07		0.170812	1827	5.03712e-05		12.8611	171.464	-7.10543e-15	0.00026484
	1828	8	197	184.26	0.1245	0.120207	5218	163.608	0.000179539	1	0	7.15621e-07		0.170945	1828	0.000132489		20.6516	163.608	-1.06581e-14	0.000155251
	1829	8	198	184.898	0.183	0.17669	4996	154.542	0.000110892	1	0	6.49688e-07		0.170951	1829	5.67056e-06		30.3554	154.542	1.42109e-14	9.58904e-05
	1830	8	199	183.541	0.238889	0.230652	4766	143.915	9.50502e-05	1	0	7.26947e-07		0.171258	1830	0.000307337		39.626	143.915	-7.10543e-15	8.21918e-05
	1831	8	200	183.235	0.2935	0.28338	4516	134.55	2.11223e-05	1	0	1.98474e-07		0.171277	1831	1.8567e-05		48.6847	134.55	-7.10543e-15	1.82648e-05
	1832	8	201	184.653	0.318	0.307036	4428	131.904	5.28057e-06	1	0	5.37603e-08		0.171473	1832	0.000196696		52.7487	131.904	1.42109e-14	4.56621e-06
	1833	8	202	180.366	0.411	0.396829	3877	112.191	5.28057e-06	1	0	6.94827e-08		0.171533	1833	5.95296e-05		68.1752	112.191	0	4.56621e-06
	1834	8	203	182.571	0.446667	0.431266	3758	108.48	1.58417e-05	1	0	2.26537e-07		0.171538	1834	5.47209e-06		74.0915	108.48	0	1.36986e-05
	1835	8	204	183.114	0.505667	0.488232	3510	99.2355	1.58417e-05	1	0	2.5646e-07		0.171835	1835	0.00029658		83.8782	99.2355	0	1.36986e-05
	1836	8	205	183.726	0.56	0.540692	3183	90.8352	5.28057e-06	1	0	9.46722e-08		0.17192	1836	8.54152e-05		92.8908	90.8352	0	4.56621e-06
	1837	8	206	192.03	0	0	5661	192.03	0.00123565	1	0	0		0.172048	1837	0.000127852		0	192.03	0	0.00106849
	1838	8	207	193.951	0.00839583	0.00810635	5700	192.558	0.000253467	1	0	6.81302e-08		0.172097	1838	4.86082e-05		1.39267	192.558	-9.76996e-15	0.000219178
	1839	8	208	193.238	0.0707333	0.0682945	5558	181.505	7.92085e-05	1	0	1.7937e-07		0.172108	1839	1.13411e-05		11.733	181.505	1.24345e-14	6.84932e-05
	1840	8	209	193.857	0.132	0.127449	5388	171.961	6.33668e-05	1	0	2.67787e-07		0.172298	1840	0.000189812		21.8957	171.961	-7.10543e-15	5.47945e-05
	1841	8	210	194.57	0.183667	0.177334	5236	164.104	3.16834e-05	1	0	1.86301e-07		0.172303	1841	5.28057e-06		30.466	164.104	-7.10543e-15	2.73973e-05
	1842	8	211	192.258	0.226	0.218208	5001	154.77	1.05611e-05	1	0	7.6414e-08		0.172307	1842	3.44357e-06		37.4881	154.77	0	9.13242e-06
	1843	8	212	192.907	0.27	0.260691	4889	148.12	5.28057e-06	1	0	4.56455e-08		0.172324	1843	1.79171e-05		44.7866	148.12	-7.10543e-15	4.56621e-06
	1844	8	213	190.791	0.456	0.440277	4005	115.151	5.28057e-06	1	0	7.70902e-08		0.172611	1844	0.0002862		75.6397	115.151	0	4.56621e-06
	1845	8	214	200.029	0	0	5751	200.029	0.000565021	1	0	0		0.172616	1845	5.09575e-06		0	200.029	0	0.000488584
	1846	8	215	199.731	0.0035	0.00337932	5733	199.151	0.000242906	1	0	2.72183e-08		0.172673	1846	5.74461e-05		0.580568	199.151	1.05471e-14	0.000210046
	1847	8	216	201.421	0.0872222	0.0842149	5633	186.953	4.75251e-05	1	0	1.3271e-07		0.172797	1847	0.000123377		14.4681	186.953	-1.77636e-15	4.10959e-05
	1848	8	217	200.136	0.1361	0.131407	5494	177.56	5.28057e-05	1	0	2.30087e-07		0.172879	1848	8.24256e-05		22.5758	177.56	1.42109e-14	4.56621e-05
	1849	8	218	201.582	0.185364	0.178972	5358	170.835	5.80862e-05	1	0	3.44708e-07		0.173062	1849	0.000183168		30.7475	170.835	3.55271e-15	5.02283e-05
	1850	8	219	201.223	0.234	0.225932	5179	162.408	2.11223e-05	1	0	1.58238e-07		0.173109	1850	4.69069e-05		38.8151	162.408	7.10543e-15	1.82648e-05
	1851	8	220	202.555	0.29	0.280001	4995	154.45	2.64028e-05	1	0	2.45133e-07		0.173385	1851	0.000276183		48.1042	154.45	1.42109e-14	2.28311e-05
	1852	8	221	201.901	0.321	0.309932	4896	148.655	2.64028e-05	1	0	2.71337e-07		0.17339	1852	4.9174e-06		53.2463	148.655	0	2.28311e-05
	1853	8	222	199.576	0.383667	0.370438	4555	135.934	1.58417e-05	1	0	1.94585e-07		0.173401	1853	1.09442e-05		63.6413	135.934	1.42109e-14	1.36986e-05
	1854	8	223	202.003	0.437	0.421933	4343	129.515	1.58417e-05	1	0	2.21634e-07		0.173404	1854	3.32304e-06		72.488	129.515	1.42109e-14	1.36986e-05
	1855	8	224	207.453	0	0	5776	207.453	4.75251e-05	1	0	0		0.173422	1855	1.729e-05		0	207.453	0	4.10959e-05
	1856	8	225	209.305	0.00366667	0.00354024	5808	208.697	1.58417e-05	1	0	1.85963e-09		0.173598	1856	0.000176757		0.608214	208.697	4.66294e-15	1.36986e-05
	1857	8	226	207.563	0.095	0.0917245	5658	191.804	1.58417e-05	1	0	4.81814e-08		0.173718	1857	0.000119059		15.7583	191.804	-1.24345e-14	1.36986e-05
	1858	8	227	206.112	0.138667	0.133886	5583	183.11	1.58417e-05	1	0	7.03279e-08		0.173722	1858	4.74529e-06		23.0015	183.11	-3.55271e-15	1.36986e-05
	1859	8	228	207.944	0.186	0.179587	5486	177.091	1.05611e-05	1	0	6.28894e-08		0.173802	1859	7.95407e-05		30.853	177.091	-1.06581e-14	9.13242e-06
	1860	8	229	207.708	0.245125	0.236673	5308	167.047	4.22445e-05	1	0	3.31522e-07		0.174068	1860	0.000266516		40.6605	167.047	0	3.65297e-05
	1861	8	230	207.202	0.288875	0.278915	5133	159.285	4.22445e-05	1	0	3.90692e-07		0.174124	1861	5.54355e-05		47.9176	159.285	-1.42109e-14	3.65297e-05
	1862	8	231	207.379	0.34675	0.334794	4935	149.861	4.22445e-05	1	0	4.68966e-07		0.174169	1862	4.52652e-05		57.5177	149.861	-1.42109e-14	3.65297e-05
	1863	8	232	206.165	0.4135	0.399243	4621	137.575	1.05611e-05	1	0	1.39811e-07		0.174174	1863	4.5792e-06		68.5899	137.575	1.42109e-14	9.13242e-06
	1864	8	233	205.187	0.4375	0.422415	4434	132.616	1.05611e-05	1	0	1.47925e-07		0.174344	1864	0.000170571		72.5709	132.616	1.42109e-14	9.13242e-06
	1865	9	1	55.303	0	0	1953	55.303	5.09575e-06	1	0	0		0.174601	1865	0.000257188		0	55.303	0	4.56621e-06
	1866	9	2	60.634	0	0	2133	60.634	0.00423457	1	0	0		0.174716	1866	0.000114892		0	60.634	0	0.00379452
	1867	9	3	67.2351	0	0	2340	67.2351	0.00401545	1	0	0		0.174727	1867	1.05611e-05		0	67.2351	0	0.00359817
	1868	9	4	69.6784	0.001	0.000960693	2431	69.5134	5.09575e-06	1	0	1.62325e-10		0.174804	1868	7.67568e-05		0.165047	69.5134	6.43929e-15	4.56621e-06
	1869	9	5	76.2057	0	0	2665	76.2057	0.00281285	1	0	0		0.174807	1869	3.20673e-06		0	76.2057	0	0.00252055
	1870	9	6	76.8501	0.001	0.000960693	2710	76.6851	4.0766e-05	1	0	1.2986e-09		0.174811	1870	4.41893e-06		0.165047	76.6851	6.43929e-15	3.65297e-05
	1871	9	7	84.2604	0	0	2928	84.2604	0.00136056	1	0	0		0.174865	1871	5.34952e-05		0	84.2604	0	0.00121918
	1872	9	8	91.784	0	0	3198	91.784	0.000524862	1	0	0		0.17496	1872	9.48675e-05		0	91.784	0	0.00047032
	1873	9	9	96.5462	0.247	0.237291	1993	55.7796	5.09575e-06	1	0	4.00942e-08		0.175124	1873	0.000164601		40.7666	55.7796	0	4.56621e-06
	1874	9	10	96.818	0.272	0.261309	1845	51.9252	5.09575e-06	1	0	4.41524e-08		0.175372	1874	0.000248187		44.8928	51.9252	0	4.56621e-06
	1875	9	11	98.8291	0	0	3477	98.8291	2.0383e-05	1	0	0		0.175416	1875	4.36809e-05		0	98.8291	0	1.82648e-05
	1876	9	12	104.212	0.036	0.0345849	3444	98.2699	1.52872e-05	1	0	1.75311e-08		0.17542	1876	4.26427e-06		5.94169	98.2699	4.44089e-15	1.36986e-05
	1877	9	13	102.506	0.08652	0.0831192	3082	88.2258	0.000127394	1	0	3.51109e-07		0.175531	1877	0.000110871		14.2799	88.2258	-3.55271e-15	0.000114155
	1878	9	14	103.171	0.134844	0.129543	2866	80.9155	0.000163064	1	0	7.00432e-07		0.175623	1878	9.15471e-05		22.2556	80.9155	0	0.000146119
	1879	9	15	102.046	0.184958	0.177688	2520	71.5191	0.000122298	1	0	7.2056e-07		0.175697	1879	7.40703e-05		30.5268	71.5191	3.55271e-15	0.000109589
	1880	9	16	102.431	0.2419	0.232392	2210	62.5066	0.000101915	1	0	7.85328e-07		0.175717	1880	2.03287e-05		39.9249	62.5066	0	9.13242e-05
	1881	9	17	102.705	0.289714	0.278326	1938	54.8882	7.13405e-05	1	0	6.5839e-07		0.175721	1881	4.11502e-06		47.8165	54.8882	0	6.39269e-05
	1882	9	18	101.823	0.336357	0.323136	1691	46.308	7.13405e-05	1	0	7.64388e-07		0.175961	1882	0.0002395		55.5148	46.308	0	6.39269e-05
	1883	9	19	101.584	0.402625	0.386799	1456	35.1324	8.1532e-05	1	0	1.0457e-06		0.17612	1883	0.00015884		66.4521	35.1324	0	7.30594e-05
	1884	9	20	102.953	0.44596	0.428431	1314	29.3488	0.000127394	1	0	1.80976e-06		0.17613	1884	1.01915e-05		73.6044	29.3488	0	0.000114155
	1885	9	21	102.19	0.49195	0.472613	1130	20.9949	0.000101915	1	0	1.59711e-06		0.176133	1885	3.0945e-06		81.1949	20.9949	0	9.13242e-05
	1886	9	22	102.203	0.552833	0.531103	917	10.9591	6.1149e-05	1	0	1.07686e-06		0.176185	1886	5.16229e-05		91.2435	10.9591	0	5.47945e-05
	1887	9	23	103.835	0.617	0.592748	748	2.00091	2.54787e-05	1	0	5.00772e-07		0.176273	1887	8.8343e-05		101.834	2.00091	0	2.28311e-05
	1888	9	24	102.801	0.6566	0.630791	1	0	2.54787e-05	0	0	0		0.17638	1888	0.00010699		102.801	0	0	2.28311e-05
	1889	9	25	103.461	0.713667	0.685615	1	0	1.52872e-05	0	0	0		0.176422	1889	4.21521e-05		103.461	0	0	1.36986e-05
	1890	9	26	102.228	0.755667	0.725964	1	0	4.58617e-05	0	0	0		0.176426	1890	3.97099e-06		102.228	0	0	4.10959e-05
	1891	9	27	102.221	0.813667	0.781684	1	0	1.52872e-05	0	0	0		0.176657	1891	0.000231118		102.221	0	0	1.36986e-05
	1892	9	28	101.688	0.925	0.888641	1	0	5.09575e-06	0	0	0		0.176729	1892	7.14779e-05		101.688	0	0	4.56621e-06
	1893	9	29	102.947	0.981	0.94244	1	0	1.01915e-05	0	0	0		0.176882	1893	0.00015328		102.947	0	0	9.13242e-06
	1894	9	30	110.646	0	0	3791	110.646	0.000219117	1	0	0		0.176967	1894	8.5251e-05		0	110.646	0	0.000196347
	1895	9	31	109.769	0.0178551	0.0171532	3737	106.822	0.000351607	1	0	1.99984e-07		0.176971	1895	3.83201e-06		2.94693	106.822	2.66454e-15	0.000315068
	1896	9	32	109.082	0.0840333	0.0807302	3331	95.2126	0.000305745	1	0	8.18442e-07		0.176991	1896	1.96172e-05		13.8695	95.2126	0	0.000273973
	1897	9	33	109.423	0.128574	0.12352	3081	88.2022	0.00027517	1	0	1.12702e-06		0.177094	1897	0.000103246		21.2208	88.2022	0	0.000246575
	1898	9	34	108.741	0.183067	0.175871	2783	78.5267	0.000229309	1	0	1.33723e-06		0.177317	1898	0.000223029		30.2146	78.5267	-3.55271e-15	0.000205479
	1899	9	35	108.805	0.237548	0.228211	2451	69.5979	0.000157968	1	0	1.19536e-06		0.177327	1899	9.83479e-06		39.2067	69.5979	0	0.000141553
	1900	9	36	109.298	0.295351	0.283742	2130	60.5513	0.000188543	1	0	1.77389e-06		0.177367	1900	4.06768e-05		48.7469	60.5513	0	0.00016895
	1901	9	37	109.847	0.342787	0.329313	1882	53.2709	0.0002395	1	0	2.61522e-06		0.17737	1901	2.98619e-06		56.576	53.2709	0	0.000214612
	1902	9	38	109.33	0.399018	0.383334	1632	43.4731	0.000285362	1	0	3.62715e-06		0.17742	1902	4.98161e-05		65.8567	43.4731	0	0.000255708
	1903	9	39	110.062	0.45425	0.436395	1454	35.0894	0.000305745	1	0	4.42416e-06		0.177424	1903	3.69789e-06		74.9726	35.0894	0	0.000273973
	1904	9	40	109.772	0.49622	0.476715	1288	27.8729	0.000208926	1	0	3.3025e-06		0.177506	1904	8.22672e-05		81.8996	27.8729	0	0.000187215
	1905	9	41	110.381	0.552314	0.530604	1094	19.2232	0.000178351	1	0	3.1379e-06		0.177654	1905	0.000147916		91.1579	19.2232	0	0.000159817
	1906	9	42	109.353	0.608087	0.584185	883	8.99022	0.000117202	1	0	2.27028e-06		0.177723	1906	6.89761e-05		100.363	8.99022	0	0.000105023
	1907	9	43	110.156	0.6545	0.628774	749	2.13302	0.000112106	1	0	2.33732e-06		0.17773	1907	6.77625e-06		108.023	2.13302	0	0.000100457
	1908	9	44	109.447	0.717048	0.688863	1	0	0.000107011	0	0	0		0.177945	1908	0.000215223		109.447	0	0	9.58904e-05
	1909	9	45	110.025	0.768773	0.738555	1	0	0.000112106	0	0	0		0.177949	1909	3.56846e-06		110.025	0	0	0.000100457
	1910	9	46	110.547	0.819667	0.787448	1	0	0.000137585	0	0	0		0.178048	1910	9.96322e-05		110.547	0	0	0.000123288
	1911	9	47	110.378	0.87832	0.843796	1	0	0.000127394	0	0	0		0.178128	1911	7.93878e-05		110.378	0	0	0.000114155
	1912	9	48	110.244	0.922417	0.886159	1	0	6.1149e-05	0	0	0		0.17827	1912	0.000142738		110.244	0	0	5.47945e-05
	1913	9	49	110.88	0.980643	0.942097	1	0	7.13405e-05	0	0	0		0.178289	1913	1.89306e-05		110.88	0	0	6.39269e-05
	1914	9	50	118.816	0	0	4070	118.816	0.00020383	1	0	0		0.178328	1914	3.92531e-05		0	118.816	0	0.000182648
	1915	9	51	117.125	0.0209362	0.0201132	3946	113.669	0.0002395	1	0	1.59728e-07		0.178335	1915	6.53908e-06		3.45545	113.669	5.77316e-15	0.000214612
	1916	9	52	116.764	0.090375	0.0868226	3566	101.848	8.1532e-05	1	0	2.34722e-07		0.178338	1916	3.44357e-06		14.9161	101.848	0	7.30594e-05
	1917	9	53	116.425	0.135152	0.129839	3280	94.1182	0.00016816	1	0	7.23969e-07		0.178348	1917	9.49058e-06		22.3064	94.1182	-3.55271e-15	0.000150685
	1918	9	54	116.405	0.183828	0.176602	2997	86.0647	0.000147777	1	0	8.65354e-07		0.178396	1918	4.80725e-05		30.3402	86.0647	-3.55271e-15	0.00013242
	1919	9	55	117.346	0.240125	0.230686	2757	77.7136	0.000122298	1	0	9.35478e-07		0.178604	1919	0.00020769		39.6319	77.7136	0	0.000109589
	1920	9	56	117.873	0.2916	0.280138	2457	69.7449	0.00020383	1	0	1.89336e-06		0.17868	1920	7.66093e-05		48.1277	69.7449	0	0.000182648
	1921	9	57	117.516	0.343423	0.329924	2163	60.8347	0.000264979	1	0	2.8988e-06		0.178747	1921	6.6562e-05		56.681	60.8347	0	0.000237443
	1922	9	58	116.704	0.39795	0.382308	1823	51.0233	0.00020383	1	0	2.58389e-06		0.17875	1922	2.88167e-06		65.6805	51.0233	0	0.000182648
	1923	9	59	117.607	0.453684	0.435851	1619	42.7282	0.000193638	1	0	2.79848e-06		0.178846	1923	9.61451e-05		74.8792	42.7282	0	0.000173516
	1924	9	60	117.292	0.499838	0.480191	1449	34.7956	0.000188543	1	0	3.00204e-06		0.178852	1924	6.31021e-06		82.4968	34.7956	0	0.00016895
	1925	9	61	117.694	0.55325	0.531503	1256	26.3819	0.000163064	1	0	2.8738e-06		0.178856	1925	3.32304e-06		91.3123	26.3819	0	0.000146119
	1926	9	62	118.274	0.60769	0.583804	1071	17.9766	0.000214021	1	0	4.14302e-06		0.178993	1926	0.000137743		100.298	17.9766	0	0.000191781
	1927	9	63	118.248	0.66025	0.634298	888	9.27605	0.000142681	1	0	3.0009e-06		0.179067	1927	7.39279e-05		108.972	9.27605	0	0.000127854
	1928	9	64	117.696	0.715436	0.687314	1	0	0.000198734	0	0	0		0.179268	1928	0.000200421		117.696	0	0	0.000178082
	1929	9	65	116.683	0.76525	0.73517	1	0	0.000163064	0	0	0		0.179274	1929	6.77625e-06		116.683	0	0	0.000146119
	1930	9	66	118.418	0.820378	0.788131	1	0	0.000229309	0	0	0		0.179281	1930	6.08936e-06		118.418	0	0	0.000205479
	1931	9	67	117.778	0.874857	0.840469	1	0	0.000142681	0	0	0		0.179318	1931	3.78792e-05		117.778	0	0	0.000127854
	1932	9	68	118.151	0.928135	0.891653	1	0	0.000188543	0	0	0		0.179322	1932	3.20673e-06		118.151	0	0	0.00016895
	1933	9	69	117.277	0.980464	0.941925	1	0	0.000142681	0	0	0		0.17934	1933	1.82681e-05		117.277	0	0	0.000127854
	1934	9	70	126.34	0	0	4254	126.34	0.000484096	1	0	0		0.179404	1934	6.42323e-05		0	126.34	0	0.00043379
	1935	9	71	124.182	0.0251429	0.0241546	4130	120.033	7.13405e-05	1	0	5.71383e-08		0.179537	1935	0.000132922		4.14975	120.033	-1.77636e-15	6.39269e-05
	1936	9	72	125.135	0.0906667	0.0871028	3778	110.171	1.52872e-05	1	0	4.41524e-08		0.17963	1936	9.278e-05		14.9643	110.171	-3.55271e-15	1.36986e-05
	1937	9	73	125.637	0.130727	0.125589	3649	104.061	5.60532e-05	1	0	2.33423e-07		0.179676	1937	4.639e-05		21.5762	104.061	-3.55271e-15	5.02283e-05
	1938	9	74	125.396	0.185417	0.178129	3309	94.7939	0.000122298	1	0	7.22346e-07		0.179748	1938	7.13405e-05		30.6025	94.7939	-3.55271e-15	0.000109589
	1939	9	75	126.125	0.23928	0.229875	3012	86.6329	0.000127394	1	0	9.71027e-07		0.179757	1939	9.1584e-06		39.4925	86.6329	7.10543e-15	0.000114155
	1940	9	76	124.62	0.293667	0.282124	2660	76.1508	0.000183447	1	0	1.7161e-06		0.17995	1940	0.000193406		48.4688	76.1508	-7.10543e-15	0.000164384
	1941	9	77	126.205	0.342775	0.329302	2454	69.6307	0.00020383	1	0	2.22564e-06		0.179956	1941	5.87623e-06		56.574	69.6307	0	0.000182648
	1942	9	78	125.744	0.39875	0.383076	2116	59.9311	0.000163064	1	0	2.07126e-06		0.179959	1942	3.0945e-06		65.8125	59.9311	0	0.000146119
	1943	9	79	125.514	0.450077	0.432386	1828	51.23	0.000132489	1	0	1.89953e-06		0.180028	1943	6.88435e-05		74.2839	51.23	0	0.000118721
	1944	9	80	126.28	0.50075	0.481067	1637	43.6327	0.000183447	1	0	2.92623e-06		0.180034	1944	5.67056e-06		82.6473	43.6327	0	0.000164384
	1945	9	81	126.137	0.553447	0.531693	1448	34.7925	0.000193638	1	0	3.41385e-06		0.180162	1945	0.000128269		91.3449	34.7925	0	0.000173516
	1946	9	82	125.777	0.610903	0.58689	1224	24.9492	0.000157968	1	0	3.07411e-06		0.180165	1946	2.98619e-06		100.828	24.9492	0	0.000141553
	1947	9	83	125.425	0.659683	0.633753	1036	16.5463	0.000208926	1	0	4.3904e-06		0.180201	1947	3.65534e-05		108.879	16.5463	0	0.000187215
	1948	9	84	126.231	0.710953	0.683008	880	8.89018	0.000219117	1	0	4.96243e-06		0.180263	1948	6.19842e-05		117.341	8.89018	0	0.000196347
	1949	9	85	125.541	0.768714	0.738498	1	0	0.000142681	0	0	0		0.180353	1949	8.95327e-05		125.541	0	0	0.000127854
	1950	9	86	125.729	0.816913	0.784803	1	0	0.000117202	0	0	0		0.18054	1950	0.000186637		125.729	0	0	0.000105023
	1951	9	87	126.192	0.871	0.836764	1	0	9.17235e-05	0	0	0		0.180546	1951	6.53908e-06		126.192	0	0	8.21918e-05
	1952	9	88	125.103	0.926333	0.889922	1	0	0.000152872	0	0	0		0.180587	1952	4.06575e-05		125.103	0	0	0.000136986
	1953	9	89	125.75	0.9791	0.940615	1	0	0.000101915	0	0	0		0.180701	1953	0.000114155		125.75	0	0	9.13242e-05
	1954	9	90	134.327	0	0	4479	134.327	0.000917235	1	0	0		0.180701	1954	0		0	134.327	0	0.000821918
	1955	9	91	136.75	0.0153438	0.0147406	4467	134.218	0.000163064	1	0	7.97015e-08		0.180701	1955	0		2.53244	134.218	6.21725e-15	0.000146119
	1956	9	92	136.469	0.0724118	0.0695655	4234	124.518	8.66277e-05	1	0	1.99822e-07		0.180701	1956	0		11.9513	124.518	5.32907e-15	7.76256e-05
	1957	9	93	134.546	0.135733	0.130398	3876	112.144	7.64362e-05	1	0	3.30493e-07		0.180701	1957	0		22.4024	112.144	3.55271e-15	6.84932e-05
	1958	9	94	135.385	0.189214	0.181777	3652	104.156	7.13405e-05	1	0	4.29998e-07		0.180701	1958	0		31.2293	104.156	7.10543e-15	6.39269e-05
	1959	9	95	134.573	0.25	0.240173	3250	93.3109	7.64362e-05	1	0	6.08718e-07		0.180701	1959	0		41.2618	93.3109	0	6.84932e-05
	1960	9	96	134.833	0.29132	0.279869	3017	86.7515	0.000127394	1	0	1.18221e-06		0.180701	1960	0		48.0815	86.7515	0	0.000114155
	1961	9	97	134.181	0.345154	0.331587	2741	77.214	0.000132489	1	0	1.4567e-06		0.180701	1961	0		56.9666	77.214	0	0.000118721
	1962	9	98	135.806	0.404889	0.388974	2406	68.98	9.17235e-05	1	0	1.18302e-06		0.180701	1962	0		66.8257	68.98	0	8.21918e-05
	1963	9	99	134.166	0.447375	0.42979	2126	60.3278	8.1532e-05	1	0	1.16192e-06		0.180701	1963	0		73.8379	60.3278	0	7.30594e-05
	1964	9	100	134.177	0.505611	0.485737	1814	50.7275	9.17235e-05	1	0	1.47732e-06		0.180701	1964	0		83.4496	50.7275	0	8.21918e-05
	1965	9	101	134.205	0.555056	0.533238	1618	42.5951	9.17235e-05	1	0	1.62179e-06		0.180701	1965	0		91.6103	42.5951	0	8.21918e-05
	1966	9	102	134.126	0.606406	0.58257	1433	34.0406	0.000163064	1	0	3.14991e-06		0.180701	1966	0		100.086	34.0406	0	0.000146119
	1967	9	103	133.839	0.657083	0.631255	1234	25.3891	0.000122298	1	0	2.55986e-06		0.180701	1967	0		108.45	25.3891	0	0.000109589
	1968	9	104	132.593	0.706895	0.679109	1019	15.9223	9.68192e-05	1	0	2.18018e-06		0.180701	1968	0		116.671	15.9223	0	8.6758e-05
	1969	9	105	134.937	0.769944	0.73968	857	7.85971	9.17235e-05	1	0	2.24966e-06		0.180701	1969	0		127.077	7.85971	0	8.21918e-05
	1970	9	106	134.452	0.825083	0.792652	1	0	0.000122298	0	0	0		0.180701	1970	0		134.452	0	0	0.000109589
	1971	9	107	133.689	0.8768	0.842336	1	0	5.09575e-05	0	0	0		0.180701	1971	0		133.689	0	0	4.56621e-05
	1972	9	108	134.382	0.930111	0.893551	1	0	9.17235e-05	0	0	0		0.180701	1972	0		134.382	0	0	8.21918e-05
	1973	9	109	134.432	0.9891	0.950221	1	0	5.09575e-05	0	0	0		0.180701	1973	0		134.432	0	0	4.56621e-05
	1974	9	110	142.322	0	0	4723	142.322	0.000988575	1	0	0		0.180701	1974	0		0	142.322	0	0.000885845
	1975	9	111	142.163	0.0132235	0.0127038	4695	139.981	0.000866277	1	0	3.64906e-07		0.180701	1975	0		2.1825	139.981	-1.19904e-14	0.000776256
	1976	9	112	142.825	0.0753415	0.07238	4378	130.39	0.000208926	1	0	5.01421e-07		0.180701	1976	0		12.4349	130.39	0	0.000187215
	1977	9	113	143.775	0.133	0.127772	4194	121.824	0.000183447	1	0	7.77211e-07		0.180701	1977	0		21.9513	121.824	7.10543e-15	0.000164384
	1978	9	114	142.756	0.18681	0.179467	3868	111.923	0.000107011	1	0	6.368e-07		0.180719	1978	1.76287e-05		30.8324	111.923	0	9.58904e-05
	1979	9	115	142.655	0.238765	0.22938	3619	103.248	8.66277e-05	1	0	6.58876e-07		0.180763	1979	4.47664e-05		39.4074	103.248	0	7.76256e-05
	1980	9	116	142.988	0.290258	0.278849	3323	95.0822	0.000157968	1	0	1.4606e-06		0.18083	1980	6.6434e-05		47.9062	95.0822	0	0.000141553
	1981	9	117	142.957	0.339292	0.325955	3022	86.9583	0.000122298	1	0	1.32181e-06		0.180835	1981	5.47209e-06		55.9991	86.9583	0	0.000109589
[truncated: 8,019 more rows]

## Sheet: Parameters
Parameters			Source
Firm's hurdle rate (discount rate)	0.035
Annual discount factor	0.965
Lifespan of solar thermal units (years)	25		http://www.epia.org/news/publications/?L=0	Solar Photovoltaics Competing in the Energy Sector	Page 25
Lifespan of gas heater units (years)	10		https://www1.eere.energy.gov/femp/pdfs/spec_comgaswtrhtr.pdf		Page 2
Investment Cost
Solar thermal upfront investment cost ($ per kw)	614		www.eia.gov/ae	Annual Energy Review 2011	Page 313
Gas heater upfront investment cost ($ per kw)	193		http://www.homedepot.com/	energy star certified product plus installation cost
Operating Cost
Solar thermal operating cost ($ per kw)	0
Energy factor of Natual Gas Heater	0.95		Energy star certified
Penalty Cost
energy (kwh) consumed for one shower (Average shower needs 10 gallons of hot water)	1.5825		Heating one gallon of water from 55 to 120 requires 540 BTU 540/1000000*293=	0.15825	kwh
Average cost of losing one customer	150
Penalty cost ($ per kwh)	10		63
Annual degradation of solar panels	0.005		Wells Fargo case
Data Source
Demand			http://en.openei.org/datasets/files/961/pub/COMMERCIAL_LOAD_DATA_E_PLUS_OUTPUT/
Solar Radiation			http://rredc.nrel.gov/solar/old_data/nsrdb/1991-2010/targzs/targzs_by_state.html
Natural Gas			http://www.eia.gov/dnav/ng/hist/n3020ca3m.htm

## Sheet: Demand-Solar
Estimate the Joint Distribution of Demand and Solar Yield
	8760	1									# of bins	400		233							1		Max index	233		1
Date	Index	Prob	Demand (kwh)	Solar Yield (d)		Demand		Yield			bin #	Demand bin #	Yield bin #	Index	Demand (kwh)		Avg	Solar Yield (L)		Avg	Probability		Index	Demand (X)	Solar Yield (L)	Prob(X,L)
2014-01-01	1	0.000114155	84.9595	0		# of bins	20	# of bins	20		1	1	1	1	55.303	46.9826	55.303	0	-0.0528947	0	0.000114155		1	55.303	0	0.000114155
2014-01-01 01:00:00	2	0.000114155	69.1502	0		Max	213.391	Max	1.005		2	1	2	0	55.303	46.9826	0	0.0528947	0	0	0		2	60.634	0	0.094863
2014-01-01 02:00:00	3	0.000114155	68.4958	0		Min	55.303	Min	0		3	1	3	0	55.303	46.9826	0	0.105789	0.0528947	0	0		3	67.2351	0	0.0899543
2014-01-01 03:00:00	4	0.000114155	58.1433	0		Interval	8.32042	Interval	0.0528947		4	1	4	0	55.303	46.9826	0	0.158684	0.105789	0	0		4	69.6784	0.001	0.000114155
2014-01-01 04:00:00	5	0.000114155	57.4665	0		Bin #	Value	Bins #	Value		5	1	5	0	55.303	46.9826	0	0.211579	0.158684	0	0		5	76.2057	0	0.0630137
2014-01-01 05:00:00	6	0.000114155	60.0156	0		1	55.303	1	0		6	1	6	0	55.303	46.9826	0	0.264474	0.211579	0	0		6	76.8501	0.001	0.000913242
2014-01-01 06:00:00	7	0.000114155	67.8649	0		2	63.6234	2	0.0528947		7	1	7	0	55.303	46.9826	0	0.317368	0.264474	0	0		7	84.2604	0	0.0304795
2014-01-01 07:00:00	8	0.000114155	109.305	0		3	71.9438	3	0.105789		8	1	8	0	55.303	46.9826	0	0.370263	0.317368	0	0		8	91.784	0	0.011758
2014-01-01 08:00:00	9	0.000114155	140.158	0.001		4	80.2643	4	0.158684		9	1	9	0	55.303	46.9826	0	0.423158	0.370263	0	0		9	96.5462	0.247	0.000114155
2014-01-01 09:00:00	10	0.000114155	194.092	0.023		5	88.5847	5	0.211579		10	1	10	0	55.303	46.9826	0	0.476053	0.423158	0	0		10	96.818	0.272	0.000114155
2014-01-01 10:00:00	11	0.000114155	164.87	0.049		6	96.9051	6	0.264474		11	1	11	0	55.303	46.9826	0	0.528947	0.476053	0	0		11	98.8291	0	0.000456621
2014-01-01 11:00:00	12	0.000114155	114.782	0.067		7	105.226	7	0.317368		12	1	12	0	55.303	46.9826	0	0.581842	0.528947	0	0		12	104.212	0.036	0.000342466
2014-01-01 12:00:00	13	0.000114155	110.521	0.079		8	113.546	8	0.370263		13	1	13	0	55.303	46.9826	0	0.634737	0.581842	0	0		13	102.506	0.08652	0.00285388
2014-01-01 13:00:00	14	0.000114155	112.316	0.087		9	121.866	9	0.423158		14	1	14	0	55.303	46.9826	0	0.687632	0.634737	0	0		14	103.171	0.134844	0.00365297
2014-01-01 14:00:00	15	0.000114155	113.553	0.077		10	130.187	10	0.476053		15	1	15	0	55.303	46.9826	0	0.740526	0.687632	0	0		15	102.046	0.184958	0.00273973
2014-01-01 15:00:00	16	0.000114155	115.22	0.069		11	138.507	11	0.528947		16	1	16	0	55.303	46.9826	0	0.793421	0.740526	0	0		16	102.431	0.2419	0.00228311
2014-01-01 16:00:00	17	0.000114155	112.867	0.082		12	146.828	12	0.581842		17	1	17	0	55.303	46.9826	0	0.846316	0.793421	0	0		17	102.705	0.289714	0.00159817
2014-01-01 17:00:00	18	0.000114155	118.791	0.014		13	155.148	13	0.634737		18	1	18	0	55.303	46.9826	0	0.899211	0.846316	0	0		18	101.823	0.336357	0.00159817
2014-01-01 18:00:00	19	0.000114155	141.827	0		14	163.468	14	0.687632		19	1	19	0	55.303	46.9826	0	0.952105	0.899211	0	0		19	101.584	0.402625	0.00182648
2014-01-01 19:00:00	20	0.000114155	172.159	0		15	171.789	15	0.740526		20	1	20	0	55.303	46.9826	0	1.005	0.952105	0	0		20	102.953	0.44596	0.00285388
2014-01-01 20:00:00	21	0.000114155	174.166	0		16	180.109	16	0.793421		21	2	1	2	63.6234	55.303	60.634	0	-0.0528947	0	0.094863		21	102.19	0.49195	0.00228311
2014-01-01 21:00:00	22	0.000114155	186.702	0		17	188.43	17	0.846316		22	2	2	0	63.6234	55.303	0	0.0528947	0	0	0		22	102.203	0.552833	0.00136986
2014-01-01 22:00:00	23	0.000114155	181.493	0		18	196.75	18	0.899211		23	2	3	0	63.6234	55.303	0	0.105789	0.0528947	0	0		23	103.835	0.617	0.000570776
2014-01-01 23:00:00	24	0.000114155	132.806	0		19	205.071	19	0.952105		24	2	4	0	63.6234	55.303	0	0.158684	0.105789	0	0		24	102.801	0.6566	0.000570776
2014-01-02	25	0.000114155	82.6819	0		20	213.391	20	1.005		25	2	5	0	63.6234	55.303	0	0.211579	0.158684	0	0		25	103.461	0.713667	0.000342466
2014-01-02 01:00:00	26	0.000114155	66.5516	0							26	2	6	0	63.6234	55.303	0	0.264474	0.211579	0	0		26	102.228	0.755667	0.0010274
2014-01-02 02:00:00	27	0.000114155	62.3357	0							27	2	7	0	63.6234	55.303	0	0.317368	0.264474	0	0		27	102.221	0.813667	0.000342466
2014-01-02 03:00:00	28	0.000114155	57.5899	0							28	2	8	0	63.6234	55.303	0	0.370263	0.317368	0	0		28	101.688	0.925	0.000114155
2014-01-02 04:00:00	29	0.000114155	56.8572	0							29	2	9	0	63.6234	55.303	0	0.423158	0.370263	0	0		29	102.947	0.981	0.000228311
2014-01-02 05:00:00	30	0.000114155	59.6826	0							30	2	10	0	63.6234	55.303	0	0.476053	0.423158	0	0		30	110.646	0	0.00490868
2014-01-02 06:00:00	31	0.000114155	75.1371	0							31	2	11	0	63.6234	55.303	0	0.528947	0.476053	0	0		31	109.769	0.0178551	0.00787671
2014-01-02 07:00:00	32	0.000114155	138.798	0							32	2	12	0	63.6234	55.303	0	0.581842	0.528947	0	0		32	109.082	0.0840333	0.00684932
2014-01-02 08:00:00	33	0.000114155	174.296	0.001							33	2	13	0	63.6234	55.303	0	0.634737	0.581842	0	0		33	109.423	0.128574	0.00616438
2014-01-02 09:00:00	34	0.000114155	148.051	0.068							34	2	14	0	63.6234	55.303	0	0.687632	0.634737	0	0		34	108.741	0.183067	0.00513699
2014-01-02 10:00:00	35	0.000114155	141.525	0.154							35	2	15	0	63.6234	55.303	0	0.740526	0.687632	0	0		35	108.805	0.237548	0.00353881
2014-01-02 11:00:00	36	0.000114155	105.996	0.195							36	2	16	0	63.6234	55.303	0	0.793421	0.740526	0	0		36	109.298	0.295351	0.00422374
2014-01-02 12:00:00	37	0.000114155	108.976	0.306							37	2	17	0	63.6234	55.303	0	0.846316	0.793421	0	0		37	109.847	0.342787	0.0053653
2014-01-02 13:00:00	38	0.000114155	111.212	0.141							38	2	18	0	63.6234	55.303	0	0.899211	0.846316	0	0		38	109.33	0.399018	0.00639269
2014-01-02 14:00:00	39	0.000114155	110.773	0.135							39	2	19	0	63.6234	55.303	0	0.952105	0.899211	0	0		39	110.062	0.45425	0.00684932
2014-01-02 15:00:00	40	0.000114155	110.907	0.059							40	2	20	0	63.6234	55.303	0	1.005	0.952105	0	0		40	109.772	0.49622	0.00468037
2014-01-02 16:00:00	41	0.000114155	109.261	0.18							41	3	1	3	71.9438	63.6234	67.2351	0	-0.0528947	0	0.0899543		41	110.381	0.552314	0.00399543
2014-01-02 17:00:00	42	0.000114155	116.314	0.032							42	3	2	4	71.9438	63.6234	69.6784	0.0528947	0	0.001	0.000114155		42	109.353	0.608087	0.00262557
2014-01-02 18:00:00	43	0.000114155	147.682	0							43	3	3	0	71.9438	63.6234	0	0.105789	0.0528947	0	0		43	110.156	0.6545	0.00251142
2014-01-02 19:00:00	44	0.000114155	162.393	0							44	3	4	0	71.9438	63.6234	0	0.158684	0.105789	0	0		44	109.447	0.717048	0.00239726
2014-01-02 20:00:00	45	0.000114155	168.549	0							45	3	5	0	71.9438	63.6234	0	0.211579	0.158684	0	0		45	110.025	0.768773	0.00251142
2014-01-02 21:00:00	46	0.000114155	187.019	0							46	3	6	0	71.9438	63.6234	0	0.264474	0.211579	0	0		46	110.547	0.819667	0.00308219
2014-01-02 22:00:00	47	0.000114155	175.91	0							47	3	7	0	71.9438	63.6234	0	0.317368	0.264474	0	0		47	110.378	0.87832	0.00285388
2014-01-02 23:00:00	48	0.000114155	122.542	0							48	3	8	0	71.9438	63.6234	0	0.370263	0.317368	0	0		48	110.244	0.922417	0.00136986
2014-01-03	49	0.000114155	78.4468	0							49	3	9	0	71.9438	63.6234	0	0.423158	0.370263	0	0		49	110.88	0.980643	0.00159817
2014-01-03 01:00:00	50	0.000114155	66.6737	0							50	3	10	0	71.9438	63.6234	0	0.476053	0.423158	0	0		50	118.816	0	0.00456621
2014-01-03 02:00:00	51	0.000114155	62.6939	0							51	3	11	0	71.9438	63.6234	0	0.528947	0.476053	0	0		51	117.125	0.0209362	0.0053653
2014-01-03 03:00:00	52	0.000114155	58.6161	0							52	3	12	0	71.9438	63.6234	0	0.581842	0.528947	0	0		52	116.764	0.090375	0.00182648
2014-01-03 04:00:00	53	0.000114155	58.5467	0							53	3	13	0	71.9438	63.6234	0	0.634737	0.581842	0	0		53	116.425	0.135152	0.00376712
2014-01-03 05:00:00	54	0.000114155	61.3557	0							54	3	14	0	71.9438	63.6234	0	0.687632	0.634737	0	0		54	116.405	0.183828	0.0033105
2014-01-03 06:00:00	55	0.000114155	76.5752	0							55	3	15	0	71.9438	63.6234	0	0.740526	0.687632	0	0		55	117.346	0.240125	0.00273973
2014-01-03 07:00:00	56	0.000114155	140.368	0							56	3	16	0	71.9438	63.6234	0	0.793421	0.740526	0	0		56	117.873	0.2916	0.00456621
2014-01-03 08:00:00	57	0.000114155	177.295	0.002							57	3	17	0	71.9438	63.6234	0	0.846316	0.793421	0	0		57	117.516	0.343423	0.00593607
2014-01-03 09:00:00	58	0.000114155	150.112	0.131							58	3	18	0	71.9438	63.6234	0	0.899211	0.846316	0	0		58	116.704	0.39795	0.00456621
2014-01-03 10:00:00	59	0.000114155	143.111	0.287							59	3	19	0	71.9438	63.6234	0	0.952105	0.899211	0	0		59	117.607	0.453684	0.0043379
2014-01-03 11:00:00	60	0.000114155	106.762	0.354							60	3	20	0	71.9438	63.6234	0	1.005	0.952105	0	0		60	117.292	0.499838	0.00422374
2014-01-03 12:00:00	61	0.000114155	107.958	0.417							61	4	1	5	80.2643	71.9438	76.2057	0	-0.0528947	0	0.0630137		61	117.694	0.55325	0.00365297
2014-01-03 13:00:00	62	0.000114155	111.349	0.418							62	4	2	6	80.2643	71.9438	76.8501	0.0528947	0	0.001	0.000913242		62	118.274	0.60769	0.00479452
2014-01-03 14:00:00	63	0.000114155	113.003	0.456							63	4	3	0	80.2643	71.9438	0	0.105789	0.0528947	0	0		63	118.248	0.66025	0.00319635
2014-01-03 15:00:00	64	0.000114155	112.688	0.356							64	4	4	0	80.2643	71.9438	0	0.158684	0.105789	0	0		64	117.696	0.715436	0.00445205
2014-01-03 16:00:00	65	0.000114155	109.443	0.197							65	4	5	0	80.2643	71.9438	0	0.211579	0.158684	0	0		65	116.683	0.76525	0.00365297
2014-01-03 17:00:00	66	0.000114155	117.321	0.047							66	4	6	0	80.2643	71.9438	0	0.264474	0.211579	0	0		66	118.418	0.820378	0.00513699
2014-01-03 18:00:00	67	0.000114155	148.99	0							67	4	7	0	80.2643	71.9438	0	0.317368	0.264474	0	0		67	117.778	0.874857	0.00319635
2014-01-03 19:00:00	68	0.000114155	163	0							68	4	8	0	80.2643	71.9438	0	0.370263	0.317368	0	0		68	118.151	0.928135	0.00422374
2014-01-03 20:00:00	69	0.000114155	168.842	0							69	4	9	0	80.2643	71.9438	0	0.423158	0.370263	0	0		69	117.277	0.980464	0.00319635
2014-01-03 21:00:00	70	0.000114155	187.377	0							70	4	10	0	80.2643	71.9438	0	0.476053	0.423158	0	0		70	126.34	0	0.0108447
2014-01-03 22:00:00	71	0.000114155	176.532	0							71	4	11	0	80.2643	71.9438	0	0.528947	0.476053	0	0		71	124.182	0.0251429	0.00159817
2014-01-03 23:00:00	72	0.000114155	123.155	0							72	4	12	0	80.2643	71.9438	0	0.581842	0.528947	0	0		72	125.135	0.0906667	0.000342466
2014-01-04	73	0.000114155	78.7229	0							73	4	13	0	80.2643	71.9438	0	0.634737	0.581842	0	0		73	125.637	0.130727	0.00125571
2014-01-04 01:00:00	74	0.000114155	66.8852	0							74	4	14	0	80.2643	71.9438	0	0.687632	0.634737	0	0		74	125.396	0.185417	0.00273973
2014-01-04 02:00:00	75	0.000114155	62.7716	0							75	4	15	0	80.2643	71.9438	0	0.740526	0.687632	0	0		75	126.125	0.23928	0.00285388
2014-01-04 03:00:00	76	0.000114155	58.2637	0							76	4	16	0	80.2643	71.9438	0	0.793421	0.740526	0	0		76	124.62	0.293667	0.00410959
2014-01-04 04:00:00	77	0.000114155	57.5078	0							77	4	17	0	80.2643	71.9438	0	0.846316	0.793421	0	0		77	126.205	0.342775	0.00456621
2014-01-04 05:00:00	78	0.000114155	59.915	0							78	4	18	0	80.2643	71.9438	0	0.899211	0.846316	0	0		78	125.744	0.39875	0.00365297
2014-01-04 06:00:00	79	0.000114155	75.2499	0							79	4	19	0	80.2643	71.9438	0	0.952105	0.899211	0	0		79	125.514	0.450077	0.00296804
2014-01-04 07:00:00	80	0.000114155	138.828	0							80	4	20	0	80.2643	71.9438	0	1.005	0.952105	0	0		80	126.28	0.50075	0.00410959
2014-01-04 08:00:00	81	0.000114155	176.099	0.001							81	5	1	7	88.5847	80.2643	84.2604	0	-0.0528947	0	0.0304795		81	126.137	0.553447	0.0043379
2014-01-04 09:00:00	82	0.000114155	146.627	0.138							82	5	2	0	88.5847	80.2643	0	0.0528947	0	0	0		82	125.777	0.610903	0.00353881
2014-01-04 10:00:00	83	0.000114155	136.655	0.295							83	5	3	0	88.5847	80.2643	0	0.105789	0.0528947	0	0		83	125.425	0.659683	0.00468037
2014-01-04 11:00:00	84	0.000114155	99.8862	0.414							84	5	4	0	88.5847	80.2643	0	0.158684	0.105789	0	0		84	126.231	0.710953	0.00490868
2014-01-04 12:00:00	85	0.000114155	102.352	0.477							85	5	5	0	88.5847	80.2643	0	0.211579	0.158684	0	0		85	125.541	0.768714	0.00319635
2014-01-04 13:00:00	86	0.000114155	104.164	0.425							86	5	6	0	88.5847	80.2643	0	0.264474	0.211579	0	0		86	125.729	0.816913	0.00262557
2014-01-04 14:00:00	87	0.000114155	106.428	0.459							87	5	7	0	88.5847	80.2643	0	0.317368	0.264474	0	0		87	126.192	0.871	0.00205479
2014-01-04 15:00:00	88	0.000114155	104.248	0.27							88	5	8	0	88.5847	80.2643	0	0.370263	0.317368	0	0		88	125.103	0.926333	0.00342466
2014-01-04 16:00:00	89	0.000114155	102.829	0.217							89	5	9	0	88.5847	80.2643	0	0.423158	0.370263	0	0		89	125.75	0.9791	0.00228311
2014-01-04 17:00:00	90	0.000114155	111.957	0.053							90	5	10	0	88.5847	80.2643	0	0.476053	0.423158	0	0		90	134.327	0	0.0205479
2014-01-04 18:00:00	91	0.000114155	144.231	0							91	5	11	0	88.5847	80.2643	0	0.528947	0.476053	0	0		91	136.75	0.0153438	0.00365297
2014-01-04 19:00:00	92	0.000114155	158.737	0							92	5	12	0	88.5847	80.2643	0	0.581842	0.528947	0	0		92	136.469	0.0724118	0.00194064
2014-01-04 20:00:00	93	0.000114155	165.003	0							93	5	13	0	88.5847	80.2643	0	0.634737	0.581842	0	0		93	134.546	0.135733	0.00171233
2014-01-04 21:00:00	94	0.000114155	184.18	0							94	5	14	0	88.5847	80.2643	0	0.687632	0.634737	0	0		94	135.385	0.189214	0.00159817
2014-01-04 22:00:00	95	0.000114155	173.655	0							95	5	15	0	88.5847	80.2643	0	0.740526	0.687632	0	0		95	134.573	0.25	0.00171233
2014-01-04 23:00:00	96	0.000114155	119.945	0							96	5	16	0	88.5847	80.2643	0	0.793421	0.740526	0	0		96	134.833	0.29132	0.00285388
2014-01-05	97	0.000114155	76.7387	0							97	5	17	0	88.5847	80.2643	0	0.846316	0.793421	0	0		97	134.181	0.345154	0.00296804
2014-01-05 01:00:00	98	0.000114155	65.4338	0							98	5	18	0	88.5847	80.2643	0	0.899211	0.846316	0	0		98	135.806	0.404889	0.00205479
2014-01-05 02:00:00	99	0.000114155	61.5398	0							99	5	19	0	88.5847	80.2643	0	0.952105	0.899211	0	0		99	134.166	0.447375	0.00182648
2014-01-05 03:00:00	100	0.000114155	56.8359	0							100	5	20	0	88.5847	80.2643	0	1.005	0.952105	0	0		100	134.177	0.505611	0.00205479
2014-01-05 04:00:00	101	0.000114155	56.0613	0							101	6	1	8	96.9051	88.5847	91.784	0	-0.0528947	0	0.011758		101	134.205	0.555056	0.00205479
2014-01-05 05:00:00	102	0.000114155	58.9043	0							102	6	2	0	96.9051	88.5847	0	0.0528947	0	0	0		102	134.126	0.606406	0.00365297
2014-01-05 06:00:00	103	0.000114155	74.1785	0							103	6	3	0	96.9051	88.5847	0	0.105789	0.0528947	0	0		103	133.839	0.657083	0.00273973
2014-01-05 07:00:00	104	0.000114155	137.958	0							104	6	4	0	96.9051	88.5847	0	0.158684	0.105789	0	0		104	132.593	0.706895	0.00216895
2014-01-05 08:00:00	105	0.000114155	175.297	0.009							105	6	5	0	96.9051	88.5847	0	0.211579	0.158684	0	0		105	134.937	0.769944	0.00205479
2014-01-05 09:00:00	106	0.000114155	145.809	0.125							106	6	6	9	96.9051	88.5847	96.5462	0.264474	0.211579	0.247	0.000114155		106	134.452	0.825083	0.00273973
2014-01-05 10:00:00	107	0.000114155	136.431	0.276							107	6	7	10	96.9051	88.5847	96.818	0.317368	0.264474	0.272	0.000114155		107	133.689	0.8768	0.00114155
2014-01-05 11:00:00	108	0.000114155	101.438	0.387							108	6	8	0	96.9051	88.5847	0	0.370263	0.317368	0	0		108	134.382	0.930111	0.00205479
2014-01-05 12:00:00	109	0.000114155	104.023	0.429							109	6	9	0	96.9051	88.5847	0	0.423158	0.370263	0	0		109	134.432	0.9891	0.00114155
2014-01-05 13:00:00	110	0.000114155	107.201	0.421							110	6	10	0	96.9051	88.5847	0	0.476053	0.423158	0	0		110	142.322	0	0.0221461
2014-01-05 14:00:00	111	0.000114155	109.288	0.397							111	6	11	0	96.9051	88.5847	0	0.528947	0.476053	0	0		111	142.163	0.0132235	0.0194064
2014-01-05 15:00:00	112	0.000114155	109.442	0.327							112	6	12	0	96.9051	88.5847	0	0.581842	0.528947	0	0		112	142.825	0.0753415	0.00468037
2014-01-05 16:00:00	113	0.000114155	107.305	0.171							113	6	13	0	96.9051	88.5847	0	0.634737	0.581842	0	0		113	143.775	0.133	0.00410959
2014-01-05 17:00:00	114	0.000114155	114.537	0.042							114	6	14	0	96.9051	88.5847	0	0.687632	0.634737	0	0		114	142.756	0.18681	0.00239726
2014-01-05 18:00:00	115	0.000114155	145.882	0							115	6	15	0	96.9051	88.5847	0	0.740526	0.687632	0	0		115	142.655	0.238765	0.00194064
2014-01-05 19:00:00	116	0.000114155	159.851	0							116	6	16	0	96.9051	88.5847	0	0.793421	0.740526	0	0		116	142.988	0.290258	0.00353881
2014-01-05 20:00:00	117	0.000114155	165.633	0							117	6	17	0	96.9051	88.5847	0	0.846316	0.793421	0	0		117	142.957	0.339292	0.00273973
2014-01-05 21:00:00	118	0.000114155	184.241	0							118	6	18	0	96.9051	88.5847	0	0.899211	0.846316	0	0		118	143.236	0.395444	0.00308219
2014-01-05 22:00:00	119	0.000114155	173.52	0							119	6	19	0	96.9051	88.5847	0	0.952105	0.899211	0	0		119	143.03	0.447333	0.00308219
2014-01-05 23:00:00	120	0.000114155	120.514	0							120	6	20	0	96.9051	88.5847	0	1.005	0.952105	0	0		120	142.977	0.501176	0.00194064
2014-01-06	121	0.000114155	76.831	0							121	7	1	11	105.226	96.9051	98.8291	0	-0.0528947	0	0.000456621		121	141.839	0.557545	0.00125571
2014-01-06 01:00:00	122	0.000114155	65.42	0							122	7	2	12	105.226	96.9051	104.212	0.0528947	0	0.036	0.000342466		122	143.27	0.60575	0.00182648
2014-01-06 02:00:00	123	0.000114155	61.4478	0							123	7	3	13	105.226	96.9051	102.506	0.105789	0.0528947	0.08652	0.00285388		123	142.824	0.655647	0.00194064
2014-01-06 03:00:00	124	0.000114155	56.9864	0							124	7	4	14	105.226	96.9051	103.171	0.158684	0.105789	0.134844	0.00365297		124	139.822	0.714889	0.0010274
2014-01-06 04:00:00	125	0.000114155	56.5543	0							125	7	5	15	105.226	96.9051	102.046	0.211579	0.158684	0.184958	0.00273973		125	141.678	0.7718	0.000570776
2014-01-06 05:00:00	126	0.000114155	59.3765	0							126	7	6	16	105.226	96.9051	102.431	0.264474	0.211579	0.2419	0.00228311		126	142.728	0.8206	0.00114155
2014-01-06 06:00:00	127	0.000114155	74.7396	0							127	7	7	17	105.226	96.9051	102.705	0.317368	0.264474	0.289714	0.00159817		127	141.412	0.8685	0.000684932
2014-01-06 07:00:00	128	0.000114155	138.183	0							128	7	8	18	105.226	96.9051	101.823	0.370263	0.317368	0.336357	0.00159817		128	143.456	0.938286	0.000799087
2014-01-06 08:00:00	129	0.000114155	175.309	0.001							129	7	9	19	105.226	96.9051	101.584	0.423158	0.370263	0.402625	0.00182648		129	143.297	0.994	0.000570776
2014-01-06 09:00:00	130	0.000114155	146.371	0.033							130	7	10	20	105.226	96.9051	102.953	0.476053	0.423158	0.44596	0.00285388		130	149.521	0	0.00696347
2014-01-06 10:00:00	131	0.000114155	137.413	0.185							131	7	11	21	105.226	96.9051	102.19	0.528947	0.476053	0.49195	0.00228311		131	149.742	0.0256486	0.00422374
2014-01-06 11:00:00	132	0.000114155	99.566	0.246							132	7	12	22	105.226	96.9051	102.203	0.581842	0.528947	0.552833	0.00136986		132	150.706	0.0837358	0.00605023
2014-01-06 12:00:00	133	0.000114155	99.0969	0.209							133	7	13	23	105.226	96.9051	103.835	0.634737	0.581842	0.617	0.000570776		133	150.566	0.13393	0.00650685
2014-01-06 13:00:00	134	0.000114155	103.174	0.143							134	7	14	24	105.226	96.9051	102.801	0.687632	0.634737	0.6566	0.000570776		134	150.954	0.1874	0.00513699
2014-01-06 14:00:00	135	0.000114155	104.75	0.123							135	7	15	25	105.226	96.9051	103.461	0.740526	0.687632	0.713667	0.000342466		135	151.609	0.2375	0.00365297
2014-01-06 15:00:00	136	0.000114155	105.293	0.093							136	7	16	26	105.226	96.9051	102.228	0.793421	0.740526	0.755667	0.0010274		136	150.593	0.2935	0.00319635
2014-01-06 16:00:00	137	0.000114155	103.894	0.121							137	7	17	27	105.226	96.9051	102.221	0.846316	0.793421	0.813667	0.000342466		137	151.352	0.342488	0.00490868
2014-01-06 17:00:00	138	0.000114155	109.776	0.03							138	7	18	0	105.226	96.9051	0	0.899211	0.846316	0	0		138	150.26	0.396147	0.00388128
2014-01-06 18:00:00	139	0.000114155	143.507	0							139	7	19	28	105.226	96.9051	101.688	0.952105	0.899211	0.925	0.000114155		139	150.624	0.451	0.00399543
2014-01-06 19:00:00	140	0.000114155	157.988	0							140	7	20	29	105.226	96.9051	102.947	1.005	0.952105	0.981	0.000228311		140	150.324	0.50384	0.00285388
2014-01-06 20:00:00	141	0.000114155	163.918	0							141	8	1	30	113.546	105.226	110.646	0	-0.0528947	0	0.00490868		141	149.989	0.551333	0.000684932
2014-01-06 21:00:00	142	0.000114155	182.358	0							142	8	2	31	113.546	105.226	109.769	0.0528947	0	0.0178551	0.00787671		142	150.834	0.611308	0.00148402
2014-01-06 22:00:00	143	0.000114155	171.726	0							143	8	3	32	113.546	105.226	109.082	0.105789	0.0528947	0.0840333	0.00684932		143	150.73	0.646333	0.000684932
2014-01-06 23:00:00	144	0.000114155	120.086	0							144	8	4	33	113.546	105.226	109.423	0.158684	0.105789	0.128574	0.00616438		144	151.634	0.709667	0.000342466
2014-01-07	145	0.000114155	76.8651	0							145	8	5	34	113.546	105.226	108.741	0.211579	0.158684	0.183067	0.00513699		145	147.687	0.773	0.000114155
2014-01-07 01:00:00	146	0.000114155	68.0667	0							146	8	6	35	113.546	105.226	108.805	0.264474	0.211579	0.237548	0.00353881		146	151.495	0.819	0.000570776
2014-01-07 02:00:00	147	0.000114155	67.6717	0							147	8	7	36	113.546	105.226	109.298	0.317368	0.264474	0.295351	0.00422374		147	149.936	0.87275	0.000456621
2014-01-07 03:00:00	148	0.000114155	57.1867	0							148	8	8	37	113.546	105.226	109.847	0.370263	0.317368	0.342787	0.0053653		148	150.126	0.969	0.000228311
2014-01-07 04:00:00	149	0.000114155	56.5694	0							149	8	9	38	113.546	105.226	109.33	0.423158	0.370263	0.399018	0.00639269		149	160.217	0	0.00616438
2014-01-07 05:00:00	150	0.000114155	59.5172	0							150	8	10	39	113.546	105.226	110.062	0.476053	0.423158	0.45425	0.00684932		150	159.223	0.023	0.000799087
2014-01-07 06:00:00	151	0.000114155	67.7707	0							151	8	11	40	113.546	105.226	109.772	0.528947	0.476053	0.49622	0.00468037		151	159.405	0.0758214	0.00319635
2014-01-07 07:00:00	152	0.000114155	109.488	0							152	8	12	41	113.546	105.226	110.381	0.581842	0.528947	0.552314	0.00399543		152	159.512	0.129875	0.00273973
2014-01-07 08:00:00	153	0.000114155	141.926	0.001							153	8	13	42	113.546	105.226	109.353	0.634737	0.581842	0.608087	0.00262557		153	159.325	0.183613	0.00353881
2014-01-07 09:00:00	154	0.000114155	190.963	0.098							154	8	14	43	113.546	105.226	110.156	0.687632	0.634737	0.6545	0.00251142		154	158.13	0.239889	0.00410959
2014-01-07 10:00:00	155	0.000114155	158.196	0.161							155	8	15	44	113.546	105.226	109.447	0.740526	0.687632	0.717048	0.00239726		155	159.159	0.290781	0.00365297
2014-01-07 11:00:00	156	0.000114155	106.048	0.109							156	8	16	45	113.546	105.226	110.025	0.793421	0.740526	0.768773	0.00251142		156	157.824	0.346273	0.00251142
2014-01-07 12:00:00	157	0.000114155	99.5318	0.193							157	8	17	46	113.546	105.226	110.547	0.846316	0.793421	0.819667	0.00308219		157	157.778	0.401632	0.00216895
2014-01-07 13:00:00	158	0.000114155	100.833	0.112							158	8	18	47	113.546	105.226	110.378	0.899211	0.846316	0.87832	0.00285388		158	157.376	0.4458	0.00228311
2014-01-07 14:00:00	159	0.000114155	102.751	0.15							159	8	19	48	113.546	105.226	110.244	0.952105	0.899211	0.922417	0.00136986		159	158.516	0.499	0.00114155
2014-01-07 15:00:00	160	0.000114155	103.067	0.085							160	8	20	49	113.546	105.226	110.88	1.005	0.952105	0.980643	0.00159817		160	159.935	0.563333	0.000342466
2014-01-07 16:00:00	161	0.000114155	103.278	0.091							161	9	1	50	121.866	113.546	118.816	0	-0.0528947	0	0.00456621		161	158.375	0.612	0.000342466
2014-01-07 17:00:00	162	0.000114155	109.477	0.023							162	9	2	51	121.866	113.546	117.125	0.0528947	0	0.0209362	0.0053653		162	161.812	0.6575	0.000228311
2014-01-07 18:00:00	163	0.000114155	135.272	0							163	9	3	52	121.866	113.546	116.764	0.105789	0.0528947	0.090375	0.00182648		163	162.289	0.708	0.000114155
2014-01-07 19:00:00	164	0.000114155	166.058	0							164	9	4	53	121.866	113.546	116.425	0.158684	0.105789	0.135152	0.00376712		164	157.881	0.7685	0.000228311
2014-01-07 20:00:00	165	0.000114155	167.978	0							165	9	5	54	121.866	113.546	116.405	0.211579	0.158684	0.183828	0.0033105		165	159.099	0.8245	0.000228311
2014-01-07 21:00:00	166	0.000114155	180.848	0							166	9	6	55	121.866	113.546	117.346	0.264474	0.211579	0.240125	0.00273973		166	167.701	0	0.0116438
2014-01-07 22:00:00	167	0.000114155	176.803	0							167	9	7	56	121.866	113.546	117.873	0.317368	0.264474	0.2916	0.00456621		167	168.938	0.0155641	0.00445205
2014-01-07 23:00:00	168	0.000114155	128.951	0							168	9	8	57	121.866	113.546	117.516	0.370263	0.317368	0.343423	0.00593607		168	168.498	0.07675	0.00365297
2014-01-08	169	0.000114155	80.2069	0							169	9	9	58	121.866	113.546	116.704	0.423158	0.370263	0.39795	0.00456621		169	167.979	0.129333	0.00308219
2014-01-08 01:00:00	170	0.000114155	67.1431	0							170	9	10	59	121.866	113.546	117.607	0.476053	0.423158	0.453684	0.0043379		170	166.873	0.185706	0.00388128
2014-01-08 02:00:00	171	0.000114155	66.5309	0							171	9	11	60	121.866	113.546	117.292	0.528947	0.476053	0.499838	0.00422374		171	167.446	0.235059	0.00194064
2014-01-08 03:00:00	172	0.000114155	56.4618	0							172	9	12	61	121.866	113.546	117.694	0.581842	0.528947	0.55325	0.00365297		172	167.294	0.290167	0.00273973
2014-01-08 04:00:00	173	0.000114155	56.0547	0							173	9	13	62	121.866	113.546	118.274	0.634737	0.581842	0.60769	0.00479452		173	168.018	0.337545	0.00125571
2014-01-08 05:00:00	174	0.000114155	59.0613	0							174	9	14	63	121.866	113.546	118.248	0.687632	0.634737	0.66025	0.00319635		174	165.211	0.390857	0.000799087
2014-01-08 06:00:00	175	0.000114155	67.3126	0							175	9	15	64	121.866	113.546	117.696	0.740526	0.687632	0.715436	0.00445205		175	169.271	0.438	0.000228311
2014-01-08 07:00:00	176	0.000114155	108.323	0							176	9	16	65	121.866	113.546	116.683	0.793421	0.740526	0.76525	0.00365297		176	168.095	0.502333	0.0010274
2014-01-08 08:00:00	177	0.000114155	140.765	0.001							177	9	17	66	121.866	113.546	118.418	0.846316	0.793421	0.820378	0.00513699		177	167.408	0.572	0.000570776
2014-01-08 09:00:00	178	0.000114155	191.547	0.036							178	9	18	67	121.866	113.546	117.778	0.899211	0.846316	0.874857	0.00319635		178	168.09	0.616	0.000228311
2014-01-08 10:00:00	179	0.000114155	161.646	0.065							179	9	19	68	121.866	113.546	118.151	0.952105	0.899211	0.928135	0.00422374		179	164.989	0.642	0.000114155
2014-01-08 11:00:00	180	0.000114155	112.445	0.105							180	9	20	69	121.866	113.546	117.277	1.005	0.952105	0.980464	0.00319635		180	175.732	0	0.0204338
2014-01-08 12:00:00	181	0.000114155	109.856	0.248							181	10	1	70	130.187	121.866	126.34	0	-0.0528947	0	0.0108447		181	175.992	0.0167	0.0159817
2014-01-08 13:00:00	182	0.000114155	112.773	0.319							182	10	2	71	130.187	121.866	124.182	0.0528947	0	0.0251429	0.00159817		182	175.755	0.0768308	0.00742009
2014-01-08 14:00:00	183	0.000114155	112.648	0.384							183	10	3	72	130.187	121.866	125.135	0.105789	0.0528947	0.0906667	0.000342466		183	177.01	0.1275	0.00273973
2014-01-08 15:00:00	184	0.000114155	113.155	0.284							184	10	4	73	130.187	121.866	125.637	0.158684	0.105789	0.130727	0.00125571		184	175.128	0.188833	0.00205479
2014-01-08 16:00:00	185	0.000114155	110.694	0.172							185	10	5	74	130.187	121.866	125.396	0.211579	0.158684	0.185417	0.00273973		185	176.078	0.243684	0.00216895
2014-01-08 17:00:00	186	0.000114155	115.255	0.045							186	10	6	75	130.187	121.866	126.125	0.264474	0.211579	0.23928	0.00285388		186	175.807	0.292143	0.00159817
2014-01-08 18:00:00	187	0.000114155	140.535	0							187	10	7	76	130.187	121.866	124.62	0.317368	0.264474	0.293667	0.00410959		187	175.31	0.3449	0.00114155
2014-01-08 19:00:00	188	0.000114155	170.72	0							188	10	8	77	130.187	121.866	126.205	0.370263	0.317368	0.342775	0.00456621		188	176.994	0.384333	0.000684932
2014-01-08 20:00:00	189	0.000114155	172.414	0							189	10	9	78	130.187	121.866	125.744	0.423158	0.370263	0.39875	0.00365297		189	175.086	0.452	0.000228311
2014-01-08 21:00:00	190	0.000114155	185.401	0							190	10	10	79	130.187	121.866	125.514	0.476053	0.423158	0.450077	0.00296804		190	175.616	0.5008	0.000570776
2014-01-08 22:00:00	191	0.000114155	180.664	0							191	10	11	80	130.187	121.866	126.28	0.528947	0.476053	0.50075	0.00410959		191	177.425	0.5524	0.000570776
2014-01-08 23:00:00	192	0.000114155	132.361	0							192	10	12	81	130.187	121.866	126.137	0.581842	0.528947	0.553447	0.0043379		192	174.325	0.612667	0.000342466
2014-01-09	193	0.000114155	82.6524	0							193	10	13	82	130.187	121.866	125.777	0.634737	0.581842	0.610903	0.00353881		193	174.32	0.638	0.000114155
2014-01-09 01:00:00	194	0.000114155	66.058	0							194	10	14	83	130.187	121.866	125.425	0.687632	0.634737	0.659683	0.00468037		194	184.763	0	0.0303653
2014-01-09 02:00:00	195	0.000114155	62.3016	0							195	10	15	84	130.187	121.866	126.231	0.740526	0.687632	0.710953	0.00490868		195	183.108	0.0169167	0.0109589
2014-01-09 03:00:00	196	0.000114155	57.9307	0							196	10	16	85	130.187	121.866	125.541	0.793421	0.740526	0.768714	0.00319635		196	184.325	0.0775345	0.006621
2014-01-09 04:00:00	197	0.000114155	57.0402	0							197	10	17	86	130.187	121.866	125.729	0.846316	0.793421	0.816913	0.00262557		197	184.26	0.1245	0.00388128
2014-01-09 05:00:00	198	0.000114155	59.7831	0							198	10	18	87	130.187	121.866	126.192	0.899211	0.846316	0.871	0.00205479		198	184.898	0.183	0.00239726
2014-01-09 06:00:00	199	0.000114155	75.0906	0							199	10	19	88	130.187	121.866	125.103	0.952105	0.899211	0.926333	0.00342466		199	183.541	0.238889	0.00205479
2014-01-09 07:00:00	200	0.000114155	138.504	0							200	10	20	89	130.187	121.866	125.75	1.005	0.952105	0.9791	0.00228311		200	183.235	0.2935	0.000456621
2014-01-09 08:00:00	201	0.000114155	174.05	0.001							201	11	1	90	138.507	130.187	134.327	0	-0.0528947	0	0.0205479		201	184.653	0.318	0.000114155
2014-01-09 09:00:00	202	0.000114155	147.138	0.097							202	11	2	91	138.507	130.187	136.75	0.0528947	0	0.0153438	0.00365297		202	180.366	0.411	0.000114155
2014-01-09 10:00:00	203	0.000114155	139.423	0.142							203	11	3	92	138.507	130.187	136.469	0.105789	0.0528947	0.0724118	0.00194064		203	182.571	0.446667	0.000342466
2014-01-09 11:00:00	204	0.000114155	104.289	0.137							204	11	4	93	138.507	130.187	134.546	0.158684	0.105789	0.135733	0.00171233		204	183.114	0.505667	0.000342466
2014-01-09 12:00:00	205	0.000114155	106.057	0.109							205	11	5	94	138.507	130.187	135.385	0.211579	0.158684	0.189214	0.00159817		205	183.726	0.56	0.000114155
2014-01-09 13:00:00	206	0.000114155	108.171	0.084							206	11	6	95	138.507	130.187	134.573	0.264474	0.211579	0.25	0.00171233		206	192.03	0	0.0267123
2014-01-09 14:00:00	207	0.000114155	107.707	0.09							207	11	7	96	138.507	130.187	134.833	0.317368	0.264474	0.29132	0.00285388		207	193.951	0.00839583	0.00547945
2014-01-09 15:00:00	208	0.000114155	108.073	0.063							208	11	8	97	138.507	130.187	134.181	0.370263	0.317368	0.345154	0.00296804		208	193.238	0.0707333	0.00171233
2014-01-09 16:00:00	209	0.000114155	104.785	0.099							209	11	9	98	138.507	130.187	135.806	0.423158	0.370263	0.404889	0.00205479		209	193.857	0.132	0.00136986
2014-01-09 17:00:00	210	0.000114155	111.448	0.026							210	11	10	99	138.507	130.187	134.166	0.476053	0.423158	0.447375	0.00182648		210	194.57	0.183667	0.000684932
2014-01-09 18:00:00	211	0.000114155	145.465	0							211	11	11	100	138.507	130.187	134.177	0.528947	0.476053	0.505611	0.00205479		211	192.258	0.226	0.000228311
2014-01-09 19:00:00	212	0.000114155	159.861	0							212	11	12	101	138.507	130.187	134.205	0.581842	0.528947	0.555056	0.00205479		212	192.907	0.27	0.000114155
2014-01-09 20:00:00	213	0.000114155	165.718	0							213	11	13	102	138.507	130.187	134.126	0.634737	0.581842	0.606406	0.00365297		213	190.791	0.456	0.000114155
2014-01-09 21:00:00	214	0.000114155	184.422	0							214	11	14	103	138.507	130.187	133.839	0.687632	0.634737	0.657083	0.00273973		214	200.029	0	0.0122146
2014-01-09 22:00:00	215	0.000114155	173.577	0							215	11	15	104	138.507	130.187	132.593	0.740526	0.687632	0.706895	0.00216895		215	199.731	0.0035	0.00525114
2014-01-09 23:00:00	216	0.000114155	120.165	0							216	11	16	105	138.507	130.187	134.937	0.793421	0.740526	0.769944	0.00205479		216	201.421	0.0872222	0.0010274
2014-01-10	217	0.000114155	76.5398	0							217	11	17	106	138.507	130.187	134.452	0.846316	0.793421	0.825083	0.00273973		217	200.136	0.1361	0.00114155
2014-01-10 01:00:00	218	0.000114155	65.2147	0							218	11	18	107	138.507	130.187	133.689	0.899211	0.846316	0.8768	0.00114155		218	201.582	0.185364	0.00125571
2014-01-10 02:00:00	219	0.000114155	61.3537	0							219	11	19	108	138.507	130.187	134.382	0.952105	0.899211	0.930111	0.00205479		219	201.223	0.234	0.000456621
2014-01-10 03:00:00	220	0.000114155	56.8694	0							220	11	20	109	138.507	130.187	134.432	1.005	0.952105	0.9891	0.00114155		220	202.555	0.29	0.000570776
2014-01-10 04:00:00	221	0.000114155	56.4212	0							221	12	1	110	146.828	138.507	142.322	0	-0.0528947	0	0.0221461		221	201.901	0.321	0.000570776
2014-01-10 05:00:00	222	0.000114155	59.2978	0							222	12	2	111	146.828	138.507	142.163	0.0528947	0	0.0132235	0.0194064		222	199.576	0.383667	0.000342466
2014-01-10 06:00:00	223	0.000114155	74.6115	0							223	12	3	112	146.828	138.507	142.825	0.105789	0.0528947	0.0753415	0.00468037		223	202.003	0.437	0.000342466
2014-01-10 07:00:00	224	0.000114155	137.998	0							224	12	4	113	146.828	138.507	143.775	0.158684	0.105789	0.133	0.00410959		224	207.453	0	0.0010274
2014-01-10 08:00:00	225	0.000114155	173.455	0.001							225	12	5	114	146.828	138.507	142.756	0.211579	0.158684	0.18681	0.00239726		225	209.305	0.00366667	0.000342466
2014-01-10 09:00:00	226	0.000114155	146.568	0.085							226	12	6	115	146.828	138.507	142.655	0.264474	0.211579	0.238765	0.00194064		226	207.563	0.095	0.000342466
2014-01-10 10:00:00	227	0.000114155	137.952	0.185							227	12	7	116	146.828	138.507	142.988	0.317368	0.264474	0.290258	0.00353881		227	206.112	0.138667	0.000342466
2014-01-10 11:00:00	228	0.000114155	101.872	0.315							228	12	8	117	146.828	138.507	142.957	0.370263	0.317368	0.339292	0.00273973		228	207.944	0.186	0.000228311
2014-01-10 12:00:00	229	0.000114155	103.58	0.442							229	12	9	118	146.828	138.507	143.236	0.423158	0.370263	0.395444	0.00308219		229	207.708	0.245125	0.000913242
2014-01-10 13:00:00	230	0.000114155	105.975	0.453							230	12	10	119	146.828	138.507	143.03	0.476053	0.423158	0.447333	0.00308219		230	207.202	0.288875	0.000913242
2014-01-10 14:00:00	231	0.000114155	106.805	0.416							231	12	11	120	146.828	138.507	142.977	0.528947	0.476053	0.501176	0.00194064		231	207.379	0.34675	0.000913242
2014-01-10 15:00:00	232	0.000114155	107.833	0.272							232	12	12	121	146.828	138.507	141.839	0.581842	0.528947	0.557545	0.00125571		232	206.165	0.4135	0.000228311
2014-01-10 16:00:00	233	0.000114155	106.372	0.172							233	12	13	122	146.828	138.507	143.27	0.634737	0.581842	0.60575	0.00182648		233	205.187	0.4375	0.000228311
2014-01-10 17:00:00	234	0.000114155	111.766	0.046							234	12	14	123	146.828	138.507	142.824	0.687632	0.634737	0.655647	0.00194064		234
2014-01-10 18:00:00	235	0.000114155	144.844	0							235	12	15	124	146.828	138.507	139.822	0.740526	0.687632	0.714889	0.0010274		235
2014-01-10 19:00:00	236	0.000114155	158.924	0							236	12	16	125	146.828	138.507	141.678	0.793421	0.740526	0.7718	0.000570776		236
2014-01-10 20:00:00	237	0.000114155	164.497	0							237	12	17	126	146.828	138.507	142.728	0.846316	0.793421	0.8206	0.00114155		237
2014-01-10 21:00:00	238	0.000114155	183.019	0							238	12	18	127	146.828	138.507	141.412	0.899211	0.846316	0.8685	0.000684932		238
2014-01-10 22:00:00	239	0.000114155	172.225	0							239	12	19	128	146.828	138.507	143.456	0.952105	0.899211	0.938286	0.000799087		239
2014-01-10 23:00:00	240	0.000114155	119.543	0							240	12	20	129	146.828	138.507	143.297	1.005	0.952105	0.994	0.000570776		240
2014-01-11	241	0.000114155	76.3686	0							241	13	1	130	155.148	146.828	149.521	0	-0.0528947	0	0.00696347		241
2014-01-11 01:00:00	242	0.000114155	64.9325	0							242	13	2	131	155.148	146.828	149.742	0.0528947	0	0.0256486	0.00422374		242
2014-01-11 02:00:00	243	0.000114155	61.0312	0							243	13	3	132	155.148	146.828	150.706	0.105789	0.0528947	0.0837358	0.00605023		243
2014-01-11 03:00:00	244	0.000114155	56.6733	0							244	13	4	133	155.148	146.828	150.566	0.158684	0.105789	0.13393	0.00650685		244
2014-01-11 04:00:00	245	0.000114155	56.0643	0							245	13	5	134	155.148	146.828	150.954	0.211579	0.158684	0.1874	0.00513699		245
2014-01-11 05:00:00	246	0.000114155	59.0903	0							246	13	6	135	155.148	146.828	151.609	0.264474	0.211579	0.2375	0.00365297		246
2014-01-11 06:00:00	247	0.000114155	74.3484	0							247	13	7	136	155.148	146.828	150.593	0.317368	0.264474	0.2935	0.00319635		247
2014-01-11 07:00:00	248	0.000114155	137.645	0							248	13	8	137	155.148	146.828	151.352	0.370263	0.317368	0.342488	0.00490868		248
2014-01-11 08:00:00	249	0.000114155	172.917	0.002							249	13	9	138	155.148	146.828	150.26	0.423158	0.370263	0.396147	0.00388128		249
2014-01-11 09:00:00	250	0.000114155	145.271	0.143							250	13	10	139	155.148	146.828	150.624	0.476053	0.423158	0.451	0.00399543		250
2014-01-11 10:00:00	251	0.000114155	135.7	0.27							251	13	11	140	155.148	146.828	150.324	0.528947	0.476053	0.50384	0.00285388		251
2014-01-11 11:00:00	252	0.000114155	101.024	0.267							252	13	12	141	155.148	146.828	149.989	0.581842	0.528947	0.551333	0.000684932		252
2014-01-11 12:00:00	253	0.000114155	103.04	0.471							253	13	13	142	155.148	146.828	150.834	0.634737	0.581842	0.611308	0.00148402		253
2014-01-11 13:00:00	254	0.000114155	103.395	0.428							254	13	14	143	155.148	146.828	150.73	0.687632	0.634737	0.646333	0.000684932		254
2014-01-11 14:00:00	255	0.000114155	106.536	0.406							255	13	15	144	155.148	146.828	151.634	0.740526	0.687632	0.709667	0.000342466		255
2014-01-11 15:00:00	256	0.000114155	107.382	0.231							256	13	16	145	155.148	146.828	147.687	0.793421	0.740526	0.773	0.000114155		256
2014-01-11 16:00:00	257	0.000114155	106.104	0.187							257	13	17	146	155.148	146.828	151.495	0.846316	0.793421	0.819	0.000570776		257
2014-01-11 17:00:00	258	0.000114155	111.445	0.016							258	13	18	147	155.148	146.828	149.936	0.899211	0.846316	0.87275	0.000456621		258
2014-01-11 18:00:00	259	0.000114155	144.797	0							259	13	19	0	155.148	146.828	0	0.952105	0.899211	0	0		259
2014-01-11 19:00:00	260	0.000114155	159.388	0							260	13	20	148	155.148	146.828	150.126	1.005	0.952105	0.969	0.000228311		260
2014-01-11 20:00:00	261	0.000114155	165.654	0							261	14	1	149	163.468	155.148	160.217	0	-0.0528947	0	0.00616438		261
2014-01-11 21:00:00	262	0.000114155	184.886	0							262	14	2	150	163.468	155.148	159.223	0.0528947	0	0.023	0.000799087		262
2014-01-11 22:00:00	263	0.000114155	174.663	0							263	14	3	151	163.468	155.148	159.405	0.105789	0.0528947	0.0758214	0.00319635		263
2014-01-11 23:00:00	264	0.000114155	121.646	0							264	14	4	152	163.468	155.148	159.512	0.158684	0.105789	0.129875	0.00273973		264
2014-01-12	265	0.000114155	77.788	0							265	14	5	153	163.468	155.148	159.325	0.211579	0.158684	0.183613	0.00353881		265
2014-01-12 01:00:00	266	0.000114155	66.2207	0							266	14	6	154	163.468	155.148	158.13	0.264474	0.211579	0.239889	0.00410959		266
2014-01-12 02:00:00	267	0.000114155	62.3759	0							267	14	7	155	163.468	155.148	159.159	0.317368	0.264474	0.290781	0.00365297		267
2014-01-12 03:00:00	268	0.000114155	57.8076	0							268	14	8	156	163.468	155.148	157.824	0.370263	0.317368	0.346273	0.00251142		268
2014-01-12 04:00:00	269	0.000114155	57.1709	0							269	14	9	157	163.468	155.148	157.778	0.423158	0.370263	0.401632	0.00216895		269
2014-01-12 05:00:00	270	0.000114155	59.9418	0							270	14	10	158	163.468	155.148	157.376	0.476053	0.423158	0.4458	0.00228311		270
2014-01-12 06:00:00	271	0.000114155	75.196	0							271	14	11	159	163.468	155.148	158.516	0.528947	0.476053	0.499	0.00114155		271
2014-01-12 07:00:00	272	0.000114155	138.94	0							272	14	12	160	163.468	155.148	159.935	0.581842	0.528947	0.563333	0.000342466		272
2014-01-12 08:00:00	273	0.000114155	175.008	0.001							273	14	13	161	163.468	155.148	158.375	0.634737	0.581842	0.612	0.000342466		273
2014-01-12 09:00:00	274	0.000114155	147.453	0.068							274	14	14	162	163.468	155.148	161.812	0.687632	0.634737	0.6575	0.000228311		274
2014-01-12 10:00:00	275	0.000114155	140.489	0.114							275	14	15	163	163.468	155.148	162.289	0.740526	0.687632	0.708	0.000114155		275
2014-01-12 11:00:00	276	0.000114155	105.931	0.07							276	14	16	164	163.468	155.148	157.881	0.793421	0.740526	0.7685	0.000228311		276
2014-01-12 12:00:00	277	0.000114155	108.544	0.195							277	14	17	165	163.468	155.148	159.099	0.846316	0.793421	0.8245	0.000228311		277
2014-01-12 13:00:00	278	0.000114155	111.163	0.292							278	14	18	0	163.468	155.148	0	0.899211	0.846316	0	0		278
2014-01-12 14:00:00	279	0.000114155	110.7	0.117							279	14	19	0	163.468	155.148	0	0.952105	0.899211	0	0		279
2014-01-12 15:00:00	280	0.000114155	110.378	0.182							280	14	20	0	163.468	155.148	0	1.005	0.952105	0	0		280
2014-01-12 16:00:00	281	0.000114155	105.651	0.232							281	15	1	166	171.789	163.468	167.701	0	-0.0528947	0	0.0116438		281
2014-01-12 17:00:00	282	0.000114155	111.921	0.042							282	15	2	167	171.789	163.468	168.938	0.0528947	0	0.0155641	0.00445205		282
2014-01-12 18:00:00	283	0.000114155	145.516	0							283	15	3	168	171.789	163.468	168.498	0.105789	0.0528947	0.07675	0.00365297		283
2014-01-12 19:00:00	284	0.000114155	160.15	0							284	15	4	169	171.789	163.468	167.979	0.158684	0.105789	0.129333	0.00308219		284
2014-01-12 20:00:00	285	0.000114155	166.647	0							285	15	5	170	171.789	163.468	166.873	0.211579	0.158684	0.185706	0.00388128		285
2014-01-12 21:00:00	286	0.000114155	186.047	0							286	15	6	171	171.789	163.468	167.446	0.264474	0.211579	0.235059	0.00194064		286
2014-01-12 22:00:00	287	0.000114155	175.939	0							287	15	7	172	171.789	163.468	167.294	0.317368	0.264474	0.290167	0.00273973		287
2014-01-12 23:00:00	288	0.000114155	122.705	0							288	15	8	173	171.789	163.468	168.018	0.370263	0.317368	0.337545	0.00125571		288
2014-01-13	289	0.000114155	78.739	0							289	15	9	174	171.789	163.468	165.211	0.423158	0.370263	0.390857	0.000799087		289
2014-01-13 01:00:00	290	0.000114155	66.7138	0							290	15	10	175	171.789	163.468	169.271	0.476053	0.423158	0.438	0.000228311		290
2014-01-13 02:00:00	291	0.000114155	62.6506	0							291	15	11	176	171.789	163.468	168.095	0.528947	0.476053	0.502333	0.0010274		291
2014-01-13 03:00:00	292	0.000114155	58.2943	0							292	15	12	177	171.789	163.468	167.408	0.581842	0.528947	0.572	0.000570776		292
2014-01-13 04:00:00	293	0.000114155	57.9532	0							293	15	13	178	171.789	163.468	168.09	0.634737	0.581842	0.616	0.000228311		293
2014-01-13 05:00:00	294	0.000114155	60.9976	0							294	15	14	179	171.789	163.468	164.989	0.687632	0.634737	0.642	0.000114155		294
2014-01-13 06:00:00	295	0.000114155	76.2985	0							295	15	15	0	171.789	163.468	0	0.740526	0.687632	0	0		295
2014-01-13 07:00:00	296	0.000114155	140.31	0							296	15	16	0	171.789	163.468	0	0.793421	0.740526	0	0		296
2014-01-13 08:00:00	297	0.000114155	176.821	0.001							297	15	17	0	171.789	163.468	0	0.846316	0.793421	0	0		297
2014-01-13 09:00:00	298	0.000114155	146.362	0.099							298	15	18	0	171.789	163.468	0	0.899211	0.846316	0	0		298
2014-01-13 10:00:00	299	0.000114155	135.904	0.285							299	15	19	0	171.789	163.468	0	0.952105	0.899211	0	0		299
2014-01-13 11:00:00	300	0.000114155	98.7953	0.365							300	15	20	0	171.789	163.468	0	1.005	0.952105	0	0		300
2014-01-13 12:00:00	301	0.000114155	100.813	0.451							301	16	1	180	180.109	171.789	175.732	0	-0.0528947	0	0.0204338		301
2014-01-13 13:00:00	302	0.000114155	105.882	0.481							302	16	2	181	180.109	171.789	175.992	0.0528947	0	0.0167	0.0159817		302
2014-01-13 14:00:00	303	0.000114155	107.191	0.458							303	16	3	182	180.109	171.789	175.755	0.105789	0.0528947	0.0768308	0.00742009		303
2014-01-13 15:00:00	304	0.000114155	106.821	0.204							304	16	4	183	180.109	171.789	177.01	0.158684	0.105789	0.1275	0.00273973		304
2014-01-13 16:00:00	305	0.000114155	105.963	0.237							305	16	5	184	180.109	171.789	175.128	0.211579	0.158684	0.188833	0.00205479		305
2014-01-13 17:00:00	306	0.000114155	111.362	0.067							306	16	6	185	180.109	171.789	176.078	0.264474	0.211579	0.243684	0.00216895		306
2014-01-13 18:00:00	307	0.000114155	145.149	0.001							307	16	7	186	180.109	171.789	175.807	0.317368	0.264474	0.292143	0.00159817		307
2014-01-13 19:00:00	308	0.000114155	159.947	0							308	16	8	187	180.109	171.789	175.31	0.370263	0.317368	0.3449	0.00114155		308
2014-01-13 20:00:00	309	0.000114155	166.175	0							309	16	9	188	180.109	171.789	176.994	0.423158	0.370263	0.384333	0.000684932		309
2014-01-13 21:00:00	310	0.000114155	185.469	0							310	16	10	189	180.109	171.789	175.086	0.476053	0.423158	0.452	0.000228311		310
2014-01-13 22:00:00	311	0.000114155	174.824	0							311	16	11	190	180.109	171.789	175.616	0.528947	0.476053	0.5008	0.000570776		311
2014-01-13 23:00:00	312	0.000114155	120.98	0							312	16	12	191	180.109	171.789	177.425	0.581842	0.528947	0.5524	0.000570776		312
2014-01-14	313	0.000114155	77.1269	0							313	16	13	192	180.109	171.789	174.325	0.634737	0.581842	0.612667	0.000342466		313
2014-01-14 01:00:00	314	0.000114155	68.1572	0							314	16	14	193	180.109	171.789	174.32	0.687632	0.634737	0.638	0.000114155		314
2014-01-14 02:00:00	315	0.000114155	67.8371	0							315	16	15	0	180.109	171.789	0	0.740526	0.687632	0	0		315
2014-01-14 03:00:00	316	0.000114155	57.6909	0							316	16	16	0	180.109	171.789	0	0.793421	0.740526	0	0		316
2014-01-14 04:00:00	317	0.000114155	57.2996	0							317	16	17	0	180.109	171.789	0	0.846316	0.793421	0	0		317
2014-01-14 05:00:00	318	0.000114155	60.3596	0							318	16	18	0	180.109	171.789	0	0.899211	0.846316	0	0		318
2014-01-14 06:00:00	319	0.000114155	68.3142	0							319	16	19	0	180.109	171.789	0	0.952105	0.899211	0	0		319
2014-01-14 07:00:00	320	0.000114155	109.742	0							320	16	20	0	180.109	171.789	0	1.005	0.952105	0	0		320
2014-01-14 08:00:00	321	0.000114155	140.304	0.001							321	17	1	194	188.43	180.109	184.763	0	-0.0528947	0	0.0303653		321
2014-01-14 09:00:00	322	0.000114155	191.226	0.031							322	17	2	195	188.43	180.109	183.108	0.0528947	0	0.0169167	0.0109589		322
2014-01-14 10:00:00	323	0.000114155	158.496	0.054							323	17	3	196	188.43	180.109	184.325	0.105789	0.0528947	0.0775345	0.006621		323
2014-01-14 11:00:00	324	0.000114155	107.53	0.088							324	17	4	197	188.43	180.109	184.26	0.158684	0.105789	0.1245	0.00388128		324
2014-01-14 12:00:00	325	0.000114155	104.547	0.152							325	17	5	198	188.43	180.109	184.898	0.211579	0.158684	0.183	0.00239726		325
2014-01-14 13:00:00	326	0.000114155	107.001	0.118							326	17	6	199	188.43	180.109	183.541	0.264474	0.211579	0.238889	0.00205479		326
2014-01-14 14:00:00	327	0.000114155	108.775	0.097							327	17	7	200	188.43	180.109	183.235	0.317368	0.264474	0.2935	0.000456621		327
2014-01-14 15:00:00	328	0.000114155	106.473	0.302							328	17	8	201	188.43	180.109	184.653	0.370263	0.317368	0.318	0.000114155		328
2014-01-14 16:00:00	329	0.000114155	107.338	0.156							329	17	9	202	188.43	180.109	180.366	0.423158	0.370263	0.411	0.000114155		329
2014-01-14 17:00:00	330	0.000114155	113.324	0.046							330	17	10	203	188.43	180.109	182.571	0.476053	0.423158	0.446667	0.000342466		330
2014-01-14 18:00:00	331	0.000114155	139.505	0.001							331	17	11	204	188.43	180.109	183.114	0.528947	0.476053	0.505667	0.000342466		331
2014-01-14 19:00:00	332	0.000114155	170.715	0							332	17	12	205	188.43	180.109	183.726	0.581842	0.528947	0.56	0.000114155		332
2014-01-14 20:00:00	333	0.000114155	172.968	0							333	17	13	0	188.43	180.109	0	0.634737	0.581842	0	0		333
2014-01-14 21:00:00	334	0.000114155	186.631	0							334	17	14	0	188.43	180.109	0	0.687632	0.634737	0	0		334
2014-01-14 22:00:00	335	0.000114155	182.828	0							335	17	15	0	188.43	180.109	0	0.740526	0.687632	0	0		335
2014-01-14 23:00:00	336	0.000114155	134.633	0							336	17	16	0	188.43	180.109	0	0.793421	0.740526	0	0		336
2014-01-15	337	0.000114155	84.0601	0							337	17	17	0	188.43	180.109	0	0.846316	0.793421	0	0		337
2014-01-15 01:00:00	338	0.000114155	69.5889	0							338	17	18	0	188.43	180.109	0	0.899211	0.846316	0	0		338
2014-01-15 02:00:00	339	0.000114155	69.1435	0							339	17	19	0	188.43	180.109	0	0.952105	0.899211	0	0		339
2014-01-15 03:00:00	340	0.000114155	58.8787	0							340	17	20	0	188.43	180.109	0	1.005	0.952105	0	0		340
2014-01-15 04:00:00	341	0.000114155	58.2642	0							341	18	1	206	196.75	188.43	192.03	0	-0.0528947	0	0.0267123		341
2014-01-15 05:00:00	342	0.000114155	61.1781	0							342	18	2	207	196.75	188.43	193.951	0.0528947	0	0.00839583	0.00547945		342
2014-01-15 06:00:00	343	0.000114155	69.3925	0							343	18	3	208	196.75	188.43	193.238	0.105789	0.0528947	0.0707333	0.00171233		343
2014-01-15 07:00:00	344	0.000114155	110.988	0							344	18	4	209	196.75	188.43	193.857	0.158684	0.105789	0.132	0.00136986		344
2014-01-15 08:00:00	345	0.000114155	141.911	0.002							345	18	5	210	196.75	188.43	194.57	0.211579	0.158684	0.183667	0.000684932		345
2014-01-15 09:00:00	346	0.000114155	194.665	0.058							346	18	6	211	196.75	188.43	192.258	0.264474	0.211579	0.226	0.000228311		346
2014-01-15 10:00:00	347	0.000114155	163.54	0.085							347	18	7	212	196.75	188.43	192.907	0.317368	0.264474	0.27	0.000114155		347
2014-01-15 11:00:00	348	0.000114155	108.486	0.094							348	18	8	0	196.75	188.43	0	0.370263	0.317368	0	0		348
2014-01-15 12:00:00	349	0.000114155	104.485	0.126							349	18	9	0	196.75	188.43	0	0.423158	0.370263	0	0		349
2014-01-15 13:00:00	350	0.000114155	104.608	0.09							350	18	10	213	196.75	188.43	190.791	0.476053	0.423158	0.456	0.000114155		350
2014-01-15 14:00:00	351	0.000114155	105.537	0.139							351	18	11	0	196.75	188.43	0	0.528947	0.476053	0	0		351
2014-01-15 15:00:00	352	0.000114155	105.154	0.153							352	18	12	0	196.75	188.43	0	0.581842	0.528947	0	0		352
2014-01-15 16:00:00	353	0.000114155	104.161	0.105							353	18	13	0	196.75	188.43	0	0.634737	0.581842	0	0		353
2014-01-15 17:00:00	354	0.000114155	112.061	0.053							354	18	14	0	196.75	188.43	0	0.687632	0.634737	0	0		354
2014-01-15 18:00:00	355	0.000114155	138.906	0.001							355	18	15	0	196.75	188.43	0	0.740526	0.687632	0	0		355
2014-01-15 19:00:00	356	0.000114155	171.186	0							356	18	16	0	196.75	188.43	0	0.793421	0.740526	0	0		356
2014-01-15 20:00:00	357	0.000114155	175.103	0							357	18	17	0	196.75	188.43	0	0.846316	0.793421	0	0		357
2014-01-15 21:00:00	358	0.000114155	189.114	0							358	18	18	0	196.75	188.43	0	0.899211	0.846316	0	0		358
2014-01-15 22:00:00	359	0.000114155	184.606	0							359	18	19	0	196.75	188.43	0	0.952105	0.899211	0	0		359
2014-01-15 23:00:00	360	0.000114155	134.729	0							360	18	20	0	196.75	188.43	0	1.005	0.952105	0	0		360
2014-01-16	361	0.000114155	85.065	0							361	19	1	214	205.071	196.75	200.029	0	-0.0528947	0	0.0122146		361
2014-01-16 01:00:00	362	0.000114155	71.9124	0							362	19	2	215	205.071	196.75	199.731	0.0528947	0	0.0035	0.00525114		362
2014-01-16 02:00:00	363	0.000114155	70.7426	0							363	19	3	216	205.071	196.75	201.421	0.105789	0.0528947	0.0872222	0.0010274		363
2014-01-16 03:00:00	364	0.000114155	60.1472	0							364	19	4	217	205.071	196.75	200.136	0.158684	0.105789	0.1361	0.00114155		364
2014-01-16 04:00:00	365	0.000114155	59.6882	0							365	19	5	218	205.071	196.75	201.582	0.211579	0.158684	0.185364	0.00125571		365
2014-01-16 05:00:00	366	0.000114155	62.556	0							366	19	6	219	205.071	196.75	201.223	0.264474	0.211579	0.234	0.000456621		366
2014-01-16 06:00:00	367	0.000114155	70.6386	0							367	19	7	220	205.071	196.75	202.555	0.317368	0.264474	0.29	0.000570776		367
2014-01-16 07:00:00	368	0.000114155	112.358	0							368	19	8	221	205.071	196.75	201.901	0.370263	0.317368	0.321	0.000570776		368
2014-01-16 08:00:00	369	0.000114155	144.931	0.001							369	19	9	222	205.071	196.75	199.576	0.423158	0.370263	0.383667	0.000342466		369
2014-01-16 09:00:00	370	0.000114155	199.098	0.101							370	19	10	223	205.071	196.75	202.003	0.476053	0.423158	0.437	0.000342466		370
2014-01-16 10:00:00	371	0.000114155	166.371	0.091							371	19	11	0	205.071	196.75	0	0.528947	0.476053	0	0		371
2014-01-16 11:00:00	372	0.000114155	113.33	0.125							372	19	12	0	205.071	196.75	0	0.581842	0.528947	0	0		372
2014-01-16 12:00:00	373	0.000114155	107.339	0.145							373	19	13	0	205.071	196.75	0	0.634737	0.581842	0	0		373
2014-01-16 13:00:00	374	0.000114155	106.804	0.19							374	19	14	0	205.071	196.75	0	0.687632	0.634737	0	0		374
2014-01-16 14:00:00	375	0.000114155	105.453	0.213							375	19	15	0	205.071	196.75	0	0.740526	0.687632	0	0		375
2014-01-16 15:00:00	376	0.000114155	104.652	0.186							376	19	16	0	205.071	196.75	0	0.793421	0.740526	0	0		376
2014-01-16 16:00:00	377	0.000114155	103.67	0.051							377	19	17	0	205.071	196.75	0	0.846316	0.793421	0	0		377
2014-01-16 17:00:00	378	0.000114155	111.464	0.015							378	19	18	0	205.071	196.75	0	0.899211	0.846316	0	0		378
2014-01-16 18:00:00	379	0.000114155	138.539	0							379	19	19	0	205.071	196.75	0	0.952105	0.899211	0	0		379
2014-01-16 19:00:00	380	0.000114155	170.216	0							380	19	20	0	205.071	196.75	0	1.005	0.952105	0	0		380
2014-01-16 20:00:00	381	0.000114155	173.247	0							381	20	1	224	213.391	205.071	207.453	0	-0.0528947	0	0.0010274		381
2014-01-16 21:00:00	382	0.000114155	187.5	0							382	20	2	225	213.391	205.071	209.305	0.0528947	0	0.00366667	0.000342466		382
2014-01-16 22:00:00	383	0.000114155	183.402	0							383	20	3	226	213.391	205.071	207.563	0.105789	0.0528947	0.095	0.000342466		383
2014-01-16 23:00:00	384	0.000114155	134.714	0							384	20	4	227	213.391	205.071	206.112	0.158684	0.105789	0.138667	0.000342466		384
2014-01-17	385	0.000114155	84.3113	0							385	20	5	228	213.391	205.071	207.944	0.211579	0.158684	0.186	0.000228311		385
2014-01-17 01:00:00	386	0.000114155	67.5883	0							386	20	6	229	213.391	205.071	207.708	0.264474	0.211579	0.245125	0.000913242		386
2014-01-17 02:00:00	387	0.000114155	63.3597	0							387	20	7	230	213.391	205.071	207.202	0.317368	0.264474	0.288875	0.000913242		387
2014-01-17 03:00:00	388	0.000114155	58.8862	0							388	20	8	231	213.391	205.071	207.379	0.370263	0.317368	0.34675	0.000913242		388
2014-01-17 04:00:00	389	0.000114155	58.5061	0							389	20	9	232	213.391	205.071	206.165	0.423158	0.370263	0.4135	0.000228311		389
2014-01-17 05:00:00	390	0.000114155	61.5199	0							390	20	10	233	213.391	205.071	205.187	0.476053	0.423158	0.4375	0.000228311		390
2014-01-17 06:00:00	391	0.000114155	77.0426	0							391	20	11	0	213.391	205.071	0	0.528947	0.476053	0	0		391
2014-01-17 07:00:00	392	0.000114155	141.724	0							392	20	12	0	213.391	205.071	0	0.581842	0.528947	0	0		392
2014-01-17 08:00:00	393	0.000114155	179.546	0.004							393	20	13	0	213.391	205.071	0	0.634737	0.581842	0	0		393
2014-01-17 09:00:00	394	0.000114155	148.847	0.141							394	20	14	0	213.391	205.071	0	0.687632	0.634737	0	0		394
2014-01-17 10:00:00	395	0.000114155	139.395	0.312							395	20	15	0	213.391	205.071	0	0.740526	0.687632	0	0		395
2014-01-17 11:00:00	396	0.000114155	101.643	0.418							396	20	16	0	213.391	205.071	0	0.793421	0.740526	0	0		396
2014-01-17 12:00:00	397	0.000114155	103.207	0.507							397	20	17	0	213.391	205.071	0	0.846316	0.793421	0	0		397
2014-01-17 13:00:00	398	0.000114155	102.749	0.529							398	20	18	0	213.391	205.071	0	0.899211	0.846316	0	0		398
2014-01-17 14:00:00	399	0.000114155	103	0.491							399	20	19	0	213.391	205.071	0	0.952105	0.899211	0	0		399
2014-01-17 15:00:00	400	0.000114155	103.068	0.396							400	20	20	0	213.391	205.071	0	1.005	0.952105	0	0		400
2014-01-17 16:00:00	401	0.000114155	102.549	0.261
2014-01-17 17:00:00	402	0.000114155	110.826	0.072
2014-01-17 18:00:00	403	0.000114155	146.082	0.002
2014-01-17 19:00:00	404	0.000114155	161.343	0
2014-01-17 20:00:00	405	0.000114155	168.231	0
2014-01-17 21:00:00	406	0.000114155	188.486	0
2014-01-17 22:00:00	407	0.000114155	178.535	0
2014-01-17 23:00:00	408	0.000114155	124.804	0
2014-01-18	409	0.000114155	80.1118	0
2014-01-18 01:00:00	410	0.000114155	68.0516	0
2014-01-18 02:00:00	411	0.000114155	63.8817	0
2014-01-18 03:00:00	412	0.000114155	59.6177	0
2014-01-18 04:00:00	413	0.000114155	59.3514	0
2014-01-18 05:00:00	414	0.000114155	62.3515	0
2014-01-18 06:00:00	415	0.000114155	77.9608	0
2014-01-18 07:00:00	416	0.000114155	144.136	0
2014-01-18 08:00:00	417	0.000114155	181.783	0.004
2014-01-18 09:00:00	418	0.000114155	147.812	0.129
2014-01-18 10:00:00	419	0.000114155	136.749	0.3
2014-01-18 11:00:00	420	0.000114155	98.6017	0.423
2014-01-18 12:00:00	421	0.000114155	99.2905	0.501
2014-01-18 13:00:00	422	0.000114155	101.809	0.441
2014-01-18 14:00:00	423	0.000114155	100.704	0.482
2014-01-18 15:00:00	424	0.000114155	101.576	0.386
2014-01-18 16:00:00	425	0.000114155	102.699	0.243
2014-01-18 17:00:00	426	0.000114155	110.114	0.034
2014-01-18 18:00:00	427	0.000114155	145.217	0.001
2014-01-18 19:00:00	428	0.000114155	160.65	0
2014-01-18 20:00:00	429	0.000114155	167.903	0
2014-01-18 21:00:00	430	0.000114155	188.33	0
2014-01-18 22:00:00	431	0.000114155	178.592	0
2014-01-18 23:00:00	432	0.000114155	124.895	0
2014-01-19	433	0.000114155	80.0789	0
2014-01-19 01:00:00	434	0.000114155	67.9517	0
2014-01-19 02:00:00	435	0.000114155	63.6699	0
2014-01-19 03:00:00	436	0.000114155	59.4391	0
2014-01-19 04:00:00	437	0.000114155	59.2305	0
2014-01-19 05:00:00	438	0.000114155	62.1766	0
2014-01-19 06:00:00	439	0.000114155	77.5811	0
2014-01-19 07:00:00	440	0.000114155	143.249	0
2014-01-19 08:00:00	441	0.000114155	181.278	0.004
2014-01-19 09:00:00	442	0.000114155	149.203	0.038
2014-01-19 10:00:00	443	0.000114155	139.952	0.062
2014-01-19 11:00:00	444	0.000114155	101.708	0.138
2014-01-19 12:00:00	445	0.000114155	101.596	0.154
2014-01-19 13:00:00	446	0.000114155	103.543	0.226
2014-01-19 14:00:00	447	0.000114155	104.448	0.147
2014-01-19 15:00:00	448	0.000114155	103.187	0.134
2014-01-19 16:00:00	449	0.000114155	101.664	0.081
2014-01-19 17:00:00	450	0.000114155	110.799	0.028
2014-01-19 18:00:00	451	0.000114155	146.37	0.001
2014-01-19 19:00:00	452	0.000114155	160.206	0
2014-01-19 20:00:00	453	0.000114155	166.381	0
2014-01-19 21:00:00	454	0.000114155	187.037	0
2014-01-19 22:00:00	455	0.000114155	177.655	0
2014-01-19 23:00:00	456	0.000114155	124.025	0
2014-01-20	457	0.000114155	80.3681	0
2014-01-20 01:00:00	458	0.000114155	68.4335	0
2014-01-20 02:00:00	459	0.000114155	64.1884	0
2014-01-20 03:00:00	460	0.000114155	59.6096	0
2014-01-20 04:00:00	461	0.000114155	59.1298	0
2014-01-20 05:00:00	462	0.000114155	62.0323	0
2014-01-20 06:00:00	463	0.000114155	77.6003	0
2014-01-20 07:00:00	464	0.000114155	144.024	0
2014-01-20 08:00:00	465	0.000114155	182.065	0.004
2014-01-20 09:00:00	466	0.000114155	150.071	0.153
2014-01-20 10:00:00	467	0.000114155	139.334	0.308
2014-01-20 11:00:00	468	0.000114155	100.476	0.42
2014-01-20 12:00:00	469	0.000114155	99.7468	0.398
2014-01-20 13:00:00	470	0.000114155	99.8937	0.533
2014-01-20 14:00:00	471	0.000114155	99.6379	0.451
2014-01-20 15:00:00	472	0.000114155	99.3755	0.398
2014-01-20 16:00:00	473	0.000114155	99.4669	0.261
2014-01-20 17:00:00	474	0.000114155	108.626	0.075
2014-01-20 18:00:00	475	0.000114155	143.605	0.002
2014-01-20 19:00:00	476	0.000114155	158.967	0
2014-01-20 20:00:00	477	0.000114155	166.115	0
2014-01-20 21:00:00	478	0.000114155	186.113	0
2014-01-20 22:00:00	479	0.000114155	175.932	0
2014-01-20 23:00:00	480	0.000114155	122.255	0
2014-01-21	481	0.000114155	77.9103	0
2014-01-21 01:00:00	482	0.000114155	69.0094	0
2014-01-21 02:00:00	483	0.000114155	68.3953	0
2014-01-21 03:00:00	484	0.000114155	58.28	0
2014-01-21 04:00:00	485	0.000114155	57.8056	0
2014-01-21 05:00:00	486	0.000114155	60.7117	0
2014-01-21 06:00:00	487	0.000114155	68.831	0
2014-01-21 07:00:00	488	0.000114155	110.561	0
2014-01-21 08:00:00	489	0.000114155	141.82	0.013
2014-01-21 09:00:00	490	0.000114155	197.881	0.158
2014-01-21 10:00:00	491	0.000114155	165.627	0.321
2014-01-21 11:00:00	492	0.000114155	111.358	0.453
2014-01-21 12:00:00	493	0.000114155	108.941	0.534
2014-01-21 13:00:00	494	0.000114155	109.236	0.555
2014-01-21 14:00:00	495	0.000114155	112.387	0.434
2014-01-21 15:00:00	496	0.000114155	110.542	0.347
2014-01-21 16:00:00	497	0.000114155	108.348	0.244
2014-01-21 17:00:00	498	0.000114155	116.075	0.046
2014-01-21 18:00:00	499	0.000114155	139.683	0.002
2014-01-21 19:00:00	500	0.000114155	172.461	0
2014-01-21 20:00:00	501	0.000114155	175.012	0
2014-01-21 21:00:00	502	0.000114155	188.275	0
2014-01-21 22:00:00	503	0.000114155	183.979	0
2014-01-21 23:00:00	504	0.000114155	135.49	0
2014-01-22	505	0.000114155	84.6038	0
2014-01-22 01:00:00	506	0.000114155	70.6049	0
2014-01-22 02:00:00	507	0.000114155	69.7618	0
2014-01-22 03:00:00	508	0.000114155	59.5515	0
2014-01-22 04:00:00	509	0.000114155	59.0859	0
2014-01-22 05:00:00	510	0.000114155	61.8346	0
2014-01-22 06:00:00	511	0.000114155	69.8415	0
2014-01-22 07:00:00	512	0.000114155	111.303	0
2014-01-22 08:00:00	513	0.000114155	142.681	0.007
2014-01-22 09:00:00	514	0.000114155	196.232	0.149
2014-01-22 10:00:00	515	0.000114155	163.06	0.295
2014-01-22 11:00:00	516	0.000114155	109.62	0.392
2014-01-22 12:00:00	517	0.000114155	104.453	0.465
2014-01-22 13:00:00	518	0.000114155	105.177	0.457
2014-01-22 14:00:00	519	0.000114155	104.498	0.44
2014-01-22 15:00:00	520	0.000114155	104.598	0.347
2014-01-22 16:00:00	521	0.000114155	102.868	0.25
2014-01-22 17:00:00	522	0.000114155	111.347	0.071
2014-01-22 18:00:00	523	0.000114155	136.527	0.003
2014-01-22 19:00:00	524	0.000114155	170.243	0
2014-01-22 20:00:00	525	0.000114155	173.761	0
2014-01-22 21:00:00	526	0.000114155	188.52	0
2014-01-22 22:00:00	527	0.000114155	184.642	0
2014-01-22 23:00:00	528	0.000114155	136.088	0
2014-01-23	529	0.000114155	85.591	0
2014-01-23 01:00:00	530	0.000114155	67.0677	0
2014-01-23 02:00:00	531	0.000114155	62.1361	0
2014-01-23 03:00:00	532	0.000114155	58.9602	0
2014-01-23 04:00:00	533	0.000114155	57.9511	0
2014-01-23 05:00:00	534	0.000114155	61.0592	0
2014-01-23 06:00:00	535	0.000114155	76.3334	0
2014-01-23 07:00:00	536	0.000114155	140.441	0
2014-01-23 08:00:00	537	0.000114155	177.767	0.005
2014-01-23 09:00:00	538	0.000114155	146.44	0.125
2014-01-23 10:00:00	539	0.000114155	135.972	0.248
2014-01-23 11:00:00	540	0.000114155	98.1731	0.368
2014-01-23 12:00:00	541	0.000114155	97.9741	0.403
2014-01-23 13:00:00	542	0.000114155	98.9693	0.49
2014-01-23 14:00:00	543	0.000114155	103.126	0.469
2014-01-23 15:00:00	544	0.000114155	102.647	0.329
2014-01-23 16:00:00	545	0.000114155	103.172	0.216
2014-01-23 17:00:00	546	0.000114155	110.787	0.051
2014-01-23 18:00:00	547	0.000114155	141.355	0.002
2014-01-23 19:00:00	548	0.000114155	157.519	0
2014-01-23 20:00:00	549	0.000114155	163.369	0
2014-01-23 21:00:00	550	0.000114155	182.231	0
2014-01-23 22:00:00	551	0.000114155	171.594	0
2014-01-23 23:00:00	552	0.000114155	118.648	0
2014-01-24	553	0.000114155	75.7696	0
2014-01-24 01:00:00	554	0.000114155	64.3921	0
2014-01-24 02:00:00	555	0.000114155	60.293	0
2014-01-24 03:00:00	556	0.000114155	55.8042	0
2014-01-24 04:00:00	557	0.000114155	55.303	0
2014-01-24 05:00:00	558	0.000114155	58.4599	0
2014-01-24 06:00:00	559	0.000114155	73.7719	0
2014-01-24 07:00:00	560	0.000114155	136.857	0
2014-01-24 08:00:00	561	0.000114155	172.428	0.003
2014-01-24 09:00:00	562	0.000114155	145.844	0.097
2014-01-24 10:00:00	563	0.000114155	137.675	0.17
2014-01-24 11:00:00	564	0.000114155	102.072	0.162
2014-01-24 12:00:00	565	0.000114155	103.453	0.183
2014-01-24 13:00:00	566	0.000114155	106.767	0.2
2014-01-24 14:00:00	567	0.000114155	108.143	0.161
2014-01-24 15:00:00	568	0.000114155	108.34	0.193
2014-01-24 16:00:00	569	0.000114155	107.017	0.098
2014-01-24 17:00:00	570	0.000114155	113.522	0.032
2014-01-24 18:00:00	571	0.000114155	143.639	0.001
2014-01-24 19:00:00	572	0.000114155	159.3	0
2014-01-24 20:00:00	573	0.000114155	165.043	0
2014-01-24 21:00:00	574	0.000114155	184.106	0
2014-01-24 22:00:00	575	0.000114155	173.77	0
2014-01-24 23:00:00	576	0.000114155	120.827	0
2014-01-25	577	0.000114155	77.1666	0
2014-01-25 01:00:00	578	0.000114155	65.844	0
2014-01-25 02:00:00	579	0.000114155	61.8545	0
2014-01-25 03:00:00	580	0.000114155	57.3855	0
2014-01-25 04:00:00	581	0.000114155	56.9569	0
2014-01-25 05:00:00	582	0.000114155	59.9157	0
2014-01-25 06:00:00	583	0.000114155	75.4315	0
2014-01-25 07:00:00	584	0.000114155	139.069	0
2014-01-25 08:00:00	585	0.000114155	174.58	0.015
2014-01-25 09:00:00	586	0.000114155	145.639	0.166
2014-01-25 10:00:00	587	0.000114155	135.88	0.325
2014-01-25 11:00:00	588	0.000114155	100	0.411
2014-01-25 12:00:00	589	0.000114155	99.1229	0.45
2014-01-25 13:00:00	590	0.000114155	100.404	0.481
2014-01-25 14:00:00	591	0.000114155	103.871	0.477
2014-01-25 15:00:00	592	0.000114155	101.213	0.318
2014-01-25 16:00:00	593	0.000114155	102.616	0.207
2014-01-25 17:00:00	594	0.000114155	109.933	0.077
2014-01-25 18:00:00	595	0.000114155	141.554	0.003
2014-01-25 19:00:00	596	0.000114155	158.02	0
2014-01-25 20:00:00	597	0.000114155	164.577	0
2014-01-25 21:00:00	598	0.000114155	184.149	0
2014-01-25 22:00:00	599	0.000114155	173.616	0
2014-01-25 23:00:00	600	0.000114155	120.292	0
2014-01-26	601	0.000114155	76.8564	0
2014-01-26 01:00:00	602	0.000114155	64.9507	0
2014-01-26 02:00:00	603	0.000114155	61.6074	0
2014-01-26 03:00:00	604	0.000114155	57.2064	0
2014-01-26 04:00:00	605	0.000114155	56.7805	0
2014-01-26 05:00:00	606	0.000114155	59.7149	0
2014-01-26 06:00:00	607	0.000114155	75.0439	0
2014-01-26 07:00:00	608	0.000114155	138.76	0
2014-01-26 08:00:00	609	0.000114155	173.868	0.005
2014-01-26 09:00:00	610	0.000114155	144.474	0.138
2014-01-26 10:00:00	611	0.000114155	134.077	0.301
2014-01-26 11:00:00	612	0.000114155	96.818	0.272
2014-01-26 12:00:00	613	0.000114155	96.5462	0.247
2014-01-26 13:00:00	614	0.000114155	98.0816	0.176
2014-01-26 14:00:00	615	0.000114155	101.444	0.137
2014-01-26 15:00:00	616	0.000114155	102.921	0.127
2014-01-26 16:00:00	617	0.000114155	102.634	0.135
2014-01-26 17:00:00	618	0.000114155	109.495	0.094
2014-01-26 18:00:00	619	0.000114155	140.874	0.004
2014-01-26 19:00:00	620	0.000114155	157.159	0
2014-01-26 20:00:00	621	0.000114155	163.037	0
2014-01-26 21:00:00	622	0.000114155	181.791	0
2014-01-26 22:00:00	623	0.000114155	171.232	0
2014-01-26 23:00:00	624	0.000114155	118.384	0
2014-01-27	625	0.000114155	75.3954	0
2014-01-27 01:00:00	626	0.000114155	64.0746	0
2014-01-27 02:00:00	627	0.000114155	60.2874	0
2014-01-27 03:00:00	628	0.000114155	56.2086	0
2014-01-27 04:00:00	629	0.000114155	55.6884	0
2014-01-27 05:00:00	630	0.000114155	58.7373	0
2014-01-27 06:00:00	631	0.000114155	74.2593	0
2014-01-27 07:00:00	632	0.000114155	137.245	0
2014-01-27 08:00:00	633	0.000114155	172.685	0.006
2014-01-27 09:00:00	634	0.000114155	146.23	0.071
2014-01-27 10:00:00	635	0.000114155	139.057	0.073
2014-01-27 11:00:00	636	0.000114155	104.476	0.224
2014-01-27 12:00:00	637	0.000114155	107.006	0.219
2014-01-27 13:00:00	638	0.000114155	109.531	0.095
2014-01-27 14:00:00	639	0.000114155	109.759	0.147
2014-01-27 15:00:00	640	0.000114155	109.533	0.114
2014-01-27 16:00:00	641	0.000114155	108.167	0.19
2014-01-27 17:00:00	642	0.000114155	114.741	0.113
2014-01-27 18:00:00	643	0.000114155	144.923	0.006
2014-01-27 19:00:00	644	0.000114155	160.476	0
2014-01-27 20:00:00	645	0.000114155	166.22	0
2014-01-27 21:00:00	646	0.000114155	185.389	0
2014-01-27 22:00:00	647	0.000114155	174.204	0
2014-01-27 23:00:00	648	0.000114155	120.826	0
2014-01-28	649	0.000114155	77.0563	0
2014-01-28 01:00:00	650	0.000114155	67.8856	0
2014-01-28 02:00:00	651	0.000114155	67.1355	0
2014-01-28 03:00:00	652	0.000114155	56.7637	0
2014-01-28 04:00:00	653	0.000114155	56.0971	0
2014-01-28 05:00:00	654	0.000114155	59.0862	0
2014-01-28 06:00:00	655	0.000114155	67.3162	0
2014-01-28 07:00:00	656	0.000114155	108.765	0
2014-01-28 08:00:00	657	0.000114155	139.502	0.014
2014-01-28 09:00:00	658	0.000114155	192.655	0.166
2014-01-28 10:00:00	659	0.000114155	162.649	0.258
2014-01-28 11:00:00	660	0.000114155	112.36	0.177
2014-01-28 12:00:00	661	0.000114155	108.884	0.404
2014-01-28 13:00:00	662	0.000114155	111.449	0.319
2014-01-28 14:00:00	663	0.000114155	113.666	0.451
2014-01-28 15:00:00	664	0.000114155	113.976	0.2
2014-01-28 16:00:00	665	0.000114155	111.739	0.191
2014-01-28 17:00:00	666	0.000114155	116.18	0.125
2014-01-28 18:00:00	667	0.000114155	138.802	0.007
2014-01-28 19:00:00	668	0.000114155	170.975	0
2014-01-28 20:00:00	669	0.000114155	172.859	0
2014-01-28 21:00:00	670	0.000114155	185.792	0
2014-01-28 22:00:00	671	0.000114155	181.289	0
2014-01-28 23:00:00	672	0.000114155	132.617	0
2014-01-29	673	0.000114155	82.9222	0
2014-01-29 01:00:00	674	0.000114155	69.1892	0
2014-01-29 02:00:00	675	0.000114155	68.1738	0
2014-01-29 03:00:00	676	0.000114155	57.7952	0
2014-01-29 04:00:00	677	0.000114155	57.1306	0
2014-01-29 05:00:00	678	0.000114155	59.83	0
2014-01-29 06:00:00	679	0.000114155	67.7656	0
2014-01-29 07:00:00	680	0.000114155	108.929	0
2014-01-29 08:00:00	681	0.000114155	139.904	0.002
2014-01-29 09:00:00	682	0.000114155	193.387	0.046
2014-01-29 10:00:00	683	0.000114155	163.354	0.09
2014-01-29 11:00:00	684	0.000114155	112.918	0.1
2014-01-29 12:00:00	685	0.000114155	109.157	0.092
2014-01-29 13:00:00	686	0.000114155	111.368	0.107
2014-01-29 14:00:00	687	0.000114155	113.642	0.119
2014-01-29 15:00:00	688	0.000114155	114.044	0.11
2014-01-29 16:00:00	689	0.000114155	112.767	0.122
2014-01-29 17:00:00	690	0.000114155	118.778	0.033
2014-01-29 18:00:00	691	0.000114155	140.772	0.002
2014-01-29 19:00:00	692	0.000114155	172.551	0
2014-01-29 20:00:00	693	0.000114155	174.783	0
2014-01-29 21:00:00	694	0.000114155	187.844	0
2014-01-29 22:00:00	695	0.000114155	182.696	0
2014-01-29 23:00:00	696	0.000114155	134.03	0
2014-01-30	697	0.000114155	83.4117	0
2014-01-30 01:00:00	698	0.000114155	66.6615	0
2014-01-30 02:00:00	699	0.000114155	62.5617	0
2014-01-30 03:00:00	700	0.000114155	57.8025	0
2014-01-30 04:00:00	701	0.000114155	57.0858	0
2014-01-30 05:00:00	702	0.000114155	59.9647	0
2014-01-30 06:00:00	703	0.000114155	75.3258	0
2014-01-30 07:00:00	704	0.000114155	138.966	0
2014-01-30 08:00:00	705	0.000114155	174.353	0.003
2014-01-30 09:00:00	706	0.000114155	146.622	0.171
2014-01-30 10:00:00	707	0.000114155	137.869	0.2
2014-01-30 11:00:00	708	0.000114155	100.491	0.282
2014-01-30 12:00:00	709	0.000114155	100.314	0.264
2014-01-30 13:00:00	710	0.000114155	100.566	0.232
2014-01-30 14:00:00	711	0.000114155	102.035	0.351
2014-01-30 15:00:00	712	0.000114155	102.021	0.151
2014-01-30 16:00:00	713	0.000114155	101.464	0.083
2014-01-30 17:00:00	714	0.000114155	110.996	0.083
2014-01-30 18:00:00	715	0.000114155	142.543	0.005
2014-01-30 19:00:00	716	0.000114155	159.094	0
2014-01-30 20:00:00	717	0.000114155	165.855	0
2014-01-30 21:00:00	718	0.000114155	185.651	0
2014-01-30 22:00:00	719	0.000114155	175.38	0
2014-01-30 23:00:00	720	0.000114155	122.051	0
2014-01-31	721	0.000114155	75.7106	0
2014-01-31 01:00:00	722	0.000114155	64.2219	0
2014-01-31 02:00:00	723	0.000114155	60.8659	0
2014-01-31 03:00:00	724	0.000114155	57.7018	0
2014-01-31 04:00:00	725	0.000114155	56.0438	0
2014-01-31 05:00:00	726	0.000114155	58.4929	0
2014-01-31 06:00:00	727	0.000114155	74.5279	0
2014-01-31 07:00:00	728	0.000114155	139.481	0
2014-01-31 08:00:00	729	0.000114155	175.866	0.017
2014-01-31 09:00:00	730	0.000114155	147.025	0.184
2014-01-31 10:00:00	731	0.000114155	136.07	0.336
2014-01-31 11:00:00	732	0.000114155	97.975	0.489
2014-01-31 12:00:00	733	0.000114155	98.4006	0.574
2014-01-31 13:00:00	734	0.000114155	101.754	0.598
2014-01-31 14:00:00	735	0.000114155	103.822	0.559
2014-01-31 15:00:00	736	0.000114155	103.97	0.463
2014-01-31 16:00:00	737	0.000114155	103.641	0.293
2014-01-31 17:00:00	738	0.000114155	111.21	0.115
2014-01-31 18:00:00	739	0.000114155	141.407	0.008
2014-01-31 19:00:00	740	0.000114155	157.41	0
2014-01-31 20:00:00	741	0.000114155	163.559	0
2014-01-31 21:00:00	742	0.000114155	182.815	0
2014-01-31 22:00:00	743	0.000114155	172.371	0
2014-01-31 23:00:00	744	0.000114155	119.441	0
2014-02-01	745	0.000114155	76.2703	0
2014-02-01 01:00:00	746	0.000114155	65.0063	0
2014-02-01 02:00:00	747	0.000114155	61.2222	0
2014-02-01 03:00:00	748	0.000114155	56.8838	0
2014-02-01 04:00:00	749	0.000114155	56.4833	0
2014-02-01 05:00:00	750	0.000114155	59.4408	0
2014-02-01 06:00:00	751	0.000114155	74.8494	0
2014-02-01 07:00:00	752	0.000114155	138.808	0
2014-02-01 08:00:00	753	0.000114155	174.488	0.008
2014-02-01 09:00:00	754	0.000114155	146.961	0.046
2014-02-01 10:00:00	755	0.000114155	140.715	0.077
2014-02-01 11:00:00	756	0.000114155	105.972	0.097
2014-02-01 12:00:00	757	0.000114155	108.894	0.111
2014-02-01 13:00:00	758	0.000114155	111.834	0.109
2014-02-01 14:00:00	759	0.000114155	113.18	0.11
2014-02-01 15:00:00	760	0.000114155	113.275	0.116
2014-02-01 16:00:00	761	0.000114155	111.99	0.092
2014-02-01 17:00:00	762	0.000114155	119.063	0.074
2014-02-01 18:00:00	763	0.000114155	149.019	0.005
2014-02-01 19:00:00	764	0.000114155	164.273	0
2014-02-01 20:00:00	765	0.000114155	170.069	0
2014-02-01 21:00:00	766	0.000114155	188.961	0
2014-02-01 22:00:00	767	0.000114155	178.243	0
2014-02-01 23:00:00	768	0.000114155	124.289	0
2014-02-02	769	0.000114155	79.2719	0
2014-02-02 01:00:00	770	0.000114155	66.7886	0
2014-02-02 02:00:00	771	0.000114155	62.5082	0
2014-02-02 03:00:00	772	0.000114155	57.8495	0
2014-02-02 04:00:00	773	0.000114155	57.1721	0
2014-02-02 05:00:00	774	0.000114155	59.9769	0
2014-02-02 06:00:00	775	0.000114155	75.2688	0
2014-02-02 07:00:00	776	0.000114155	138.896	0
2014-02-02 08:00:00	777	0.000114155	174.743	0.005
2014-02-02 09:00:00	778	0.000114155	146.99	0.031
2014-02-02 10:00:00	779	0.000114155	139.343	0.06
2014-02-02 11:00:00	780	0.000114155	104.318	0.109
2014-02-02 12:00:00	781	0.000114155	106.02	0.494
2014-02-02 13:00:00	782	0.000114155	108.134	0.36
2014-02-02 14:00:00	783	0.000114155	108.896	0.492
2014-02-02 15:00:00	784	0.000114155	108.924	0.47
2014-02-02 16:00:00	785	0.000114155	107.501	0.26
2014-02-02 17:00:00	786	0.000114155	114.725	0.105
2014-02-02 18:00:00	787	0.000114155	145.357	0.001
2014-02-02 19:00:00	788	0.000114155	161.228	0
2014-02-02 20:00:00	789	0.000114155	167.033	0
2014-02-02 21:00:00	790	0.000114155	185.558	0
2014-02-02 22:00:00	791	0.000114155	174.546	0
2014-02-02 23:00:00	792	0.000114155	121.418	0
2014-02-03	793	0.000114155	77.8233	0
2014-02-03 01:00:00	794	0.000114155	66.2891	0
2014-02-03 02:00:00	795	0.000114155	62.3364	0
2014-02-03 03:00:00	796	0.000114155	57.8709	0
2014-02-03 04:00:00	797	0.000114155	57.359	0
2014-02-03 05:00:00	798	0.000114155	60.1813	0
2014-02-03 06:00:00	799	0.000114155	75.4672	0
2014-02-03 07:00:00	800	0.000114155	139.015	0
2014-02-03 08:00:00	801	0.000114155	174.601	0.016
2014-02-03 09:00:00	802	0.000114155	146.569	0.154
2014-02-03 10:00:00	803	0.000114155	139.096	0.095
2014-02-03 11:00:00	804	0.000114155	104.287	0.185
2014-02-03 12:00:00	805	0.000114155	106.182	0.481
2014-02-03 13:00:00	806	0.000114155	106.625	0.373
2014-02-03 14:00:00	807	0.000114155	109.903	0.402
2014-02-03 15:00:00	808	0.000114155	109.881	0.346
2014-02-03 16:00:00	809	0.000114155	109.383	0.146
2014-02-03 17:00:00	810	0.000114155	116.829	0.134
2014-02-03 18:00:00	811	0.000114155	147.316	0.003
2014-02-03 19:00:00	812	0.000114155	162.937	0
2014-02-03 20:00:00	813	0.000114155	168.747	0
2014-02-03 21:00:00	814	0.000114155	187.443	0
2014-02-03 22:00:00	815	0.000114155	176.482	0
2014-02-03 23:00:00	816	0.000114155	122.808	0
2014-02-04	817	0.000114155	78.3985	0
2014-02-04 01:00:00	818	0.000114155	68.882	0
2014-02-04 02:00:00	819	0.000114155	68.1361	0
2014-02-04 03:00:00	820	0.000114155	57.8838	0
2014-02-04 04:00:00	821	0.000114155	57.3378	0
2014-02-04 05:00:00	822	0.000114155	60.1005	0
2014-02-04 06:00:00	823	0.000114155	68.0287	0
2014-02-04 07:00:00	824	0.000114155	109.363	0
2014-02-04 08:00:00	825	0.000114155	140.135	0.024
2014-02-04 09:00:00	826	0.000114155	193.295	0.172
2014-02-04 10:00:00	827	0.000114155	162.557	0.36
2014-02-04 11:00:00	828	0.000114155	111.554	0.505
2014-02-04 12:00:00	829	0.000114155	106.859	0.591
2014-02-04 13:00:00	830	0.000114155	108.278	0.465
2014-02-04 14:00:00	831	0.000114155	108.6	0.557
2014-02-04 15:00:00	832	0.000114155	108.074	0.481
2014-02-04 16:00:00	833	0.000114155	107.443	0.304
2014-02-04 17:00:00	834	0.000114155	115.052	0.144
2014-02-04 18:00:00	835	0.000114155	137.344	0.011
2014-02-04 19:00:00	836	0.000114155	171.865	0
2014-02-04 20:00:00	837	0.000114155	174.144	0
2014-02-04 21:00:00	838	0.000114155	187.369	0
2014-02-04 22:00:00	839	0.000114155	183.08	0
2014-02-04 23:00:00	840	0.000114155	134.259	0
2014-02-05	841	0.000114155	83.3931	0
2014-02-05 01:00:00	842	0.000114155	69.2181	0
2014-02-05 02:00:00	843	0.000114155	68.3617	0
2014-02-05 03:00:00	844	0.000114155	58.0703	0
2014-02-05 04:00:00	845	0.000114155	57.4893	0
2014-02-05 05:00:00	846	0.000114155	60.2777	0
2014-02-05 06:00:00	847	0.000114155	68.2862	0
2014-02-05 07:00:00	848	0.000114155	109.506	0
2014-02-05 08:00:00	849	0.000114155	140.688	0.027
2014-02-05 09:00:00	850	0.000114155	194.017	0.199
2014-02-05 10:00:00	851	0.000114155	163.34	0.359
2014-02-05 11:00:00	852	0.000114155	113.403	0.103
2014-02-05 12:00:00	853	0.000114155	109.237	0.441
2014-02-05 13:00:00	854	0.000114155	109.631	0.467
2014-02-05 14:00:00	855	0.000114155	108.751	0.283
2014-02-05 15:00:00	856	0.000114155	108.279	0.236
2014-02-05 16:00:00	857	0.000114155	107.167	0.098
2014-02-05 17:00:00	858	0.000114155	115.313	0.089
2014-02-05 18:00:00	859	0.000114155	137.314	0.003
2014-02-05 19:00:00	860	0.000114155	171.766	0
2014-02-05 20:00:00	861	0.000114155	174.499	0
2014-02-05 21:00:00	862	0.000114155	188.243	0
2014-02-05 22:00:00	863	0.000114155	183.701	0
2014-02-05 23:00:00	864	0.000114155	135.323	0
2014-02-06	865	0.000114155	85.1037	0
2014-02-06 01:00:00	866	0.000114155	68.4228	0
2014-02-06 02:00:00	867	0.000114155	63.9606	0
2014-02-06 03:00:00	868	0.000114155	59.3856	0
2014-02-06 04:00:00	869	0.000114155	58.7838	0
2014-02-06 05:00:00	870	0.000114155	61.6432	0
2014-02-06 06:00:00	871	0.000114155	77.0781	0
2014-02-06 07:00:00	872	0.000114155	141.701	0
2014-02-06 08:00:00	873	0.000114155	177.825	0.008
2014-02-06 09:00:00	874	0.000114155	148.511	0.126
2014-02-06 10:00:00	875	0.000114155	138.484	0.105
2014-02-06 11:00:00	876	0.000114155	102.779	0.258
2014-02-06 12:00:00	877	0.000114155	107.821	0.097
2014-02-06 13:00:00	878	0.000114155	111.286	0.529
2014-02-06 14:00:00	879	0.000114155	113.539	0.574
2014-02-06 15:00:00	880	0.000114155	114.216	0.464
2014-02-06 16:00:00	881	0.000114155	114.533	0.279
2014-02-06 17:00:00	882	0.000114155	121.54	0.128
2014-02-06 18:00:00	883	0.000114155	149.632	0.006
2014-02-06 19:00:00	884	0.000114155	166.356	0
2014-02-06 20:00:00	885	0.000114155	171.938	0
2014-02-06 21:00:00	886	0.000114155	190.622	0
2014-02-06 22:00:00	887	0.000114155	179.545	0
2014-02-06 23:00:00	888	0.000114155	125.668	0
2014-02-07	889	0.000114155	80.6102	0
2014-02-07 01:00:00	890	0.000114155	68.2195	0
2014-02-07 02:00:00	891	0.000114155	63.6171	0
2014-02-07 03:00:00	892	0.000114155	58.7908	0
2014-02-07 04:00:00	893	0.000114155	58.0053	0
2014-02-07 05:00:00	894	0.000114155	60.7946	0
2014-02-07 06:00:00	895	0.000114155	76.2087	0
2014-02-07 07:00:00	896	0.000114155	140.161	0
2014-02-07 08:00:00	897	0.000114155	174.165	0.033
2014-02-07 09:00:00	898	0.000114155	146.837	0.207
2014-02-07 10:00:00	899	0.000114155	136.794	0.352
2014-02-07 11:00:00	900	0.000114155	99.6917	0.498
2014-02-07 12:00:00	901	0.000114155	100.503	0.535
2014-02-07 13:00:00	902	0.000114155	101.576	0.55
2014-02-07 14:00:00	903	0.000114155	102.451	0.564
2014-02-07 15:00:00	904	0.000114155	103.006	0.495
2014-02-07 16:00:00	905	0.000114155	102.657	0.335
2014-02-07 17:00:00	906	0.000114155	111.718	0.153
2014-02-07 18:00:00	907	0.000114155	142.472	0.008
2014-02-07 19:00:00	908	0.000114155	160.786	0
2014-02-07 20:00:00	909	0.000114155	167.612	0
2014-02-07 21:00:00	910	0.000114155	187.476	0
2014-02-07 22:00:00	911	0.000114155	177.209	0
2014-02-07 23:00:00	912	0.000114155	123.613	0
2014-02-08	913	0.000114155	79.0246	0
2014-02-08 01:00:00	914	0.000114155	67.16	0
2014-02-08 02:00:00	915	0.000114155	63.1621	0
2014-02-08 03:00:00	916	0.000114155	58.8032	0
2014-02-08 04:00:00	917	0.000114155	58.4234	0
2014-02-08 05:00:00	918	0.000114155	61.2444	0
2014-02-08 06:00:00	919	0.000114155	76.5337	0
2014-02-08 07:00:00	920	0.000114155	140.504	0
2014-02-08 08:00:00	921	0.000114155	176.669	0.011
2014-02-08 09:00:00	922	0.000114155	148.759	0.088
2014-02-08 10:00:00	923	0.000114155	139.292	0.165
2014-02-08 11:00:00	924	0.000114155	102.756	0.219
2014-02-08 12:00:00	925	0.000114155	101.05	0.319
2014-02-08 13:00:00	926	0.000114155	101.536	0.311
2014-02-08 14:00:00	927	0.000114155	103.28	0.353
2014-02-08 15:00:00	928	0.000114155	103.917	0.258
2014-02-08 16:00:00	929	0.000114155	103.439	0.141
2014-02-08 17:00:00	930	0.000114155	111.321	0.07
2014-02-08 18:00:00	931	0.000114155	142.35	0.004
2014-02-08 19:00:00	932	0.000114155	160.991	0
2014-02-08 20:00:00	933	0.000114155	167.689	0
2014-02-08 21:00:00	934	0.000114155	187.318	0
2014-02-08 22:00:00	935	0.000114155	176.882	0
2014-02-08 23:00:00	936	0.000114155	123.012	0
2014-02-09	937	0.000114155	78.4111	0
2014-02-09 01:00:00	938	0.000114155	66.616	0
2014-02-09 02:00:00	939	0.000114155	62.491	0
2014-02-09 03:00:00	940	0.000114155	57.9427	0
2014-02-09 04:00:00	941	0.000114155	57.328	0
2014-02-09 05:00:00	942	0.000114155	60.0796	0
2014-02-09 06:00:00	943	0.000114155	75.3366	0
2014-02-09 07:00:00	944	0.000114155	139.129	0
2014-02-09 08:00:00	945	0.000114155	173.663	0.038
2014-02-09 09:00:00	946	0.000114155	148.231	0.211
2014-02-09 10:00:00	947	0.000114155	141.817	0.131
2014-02-09 11:00:00	948	0.000114155	105.759	0.462
2014-02-09 12:00:00	949	0.000114155	105.087	0.446
2014-02-09 13:00:00	950	0.000114155	104.237	0.513
2014-02-09 14:00:00	951	0.000114155	105.93	0.603
2014-02-09 15:00:00	952	0.000114155	107.194	0.505
2014-02-09 16:00:00	953	0.000114155	106.687	0.28
2014-02-09 17:00:00	954	0.000114155	115.172	0.153
2014-02-09 18:00:00	955	0.000114155	145.042	0.011
2014-02-09 19:00:00	956	0.000114155	162.797	0
2014-02-09 20:00:00	957	0.000114155	169.065	0
2014-02-09 21:00:00	958	0.000114155	188.394	0
2014-02-09 22:00:00	959	0.000114155	177.809	0
2014-02-09 23:00:00	960	0.000114155	124.106	0
2014-02-10	961	0.000114155	79.4942	0
2014-02-10 01:00:00	962	0.000114155	67.5125	0
2014-02-10 02:00:00	963	0.000114155	63.2462	0
2014-02-10 03:00:00	964	0.000114155	58.5286	0
2014-02-10 04:00:00	965	0.000114155	57.8299	0
2014-02-10 05:00:00	966	0.000114155	60.5907	0
2014-02-10 06:00:00	967	0.000114155	75.9434	0
2014-02-10 07:00:00	968	0.000114155	139.83	0
2014-02-10 08:00:00	969	0.000114155	173.976	0.024
2014-02-10 09:00:00	970	0.000114155	146.3	0.127
2014-02-10 10:00:00	971	0.000114155	136.686	0.069
2014-02-10 11:00:00	972	0.000114155	102.177	0.311
2014-02-10 12:00:00	973	0.000114155	105.701	0.217
2014-02-10 13:00:00	974	0.000114155	109.127	0.145
2014-02-10 14:00:00	975	0.000114155	110.382	0.472
2014-02-10 15:00:00	976	0.000114155	112.903	0.393
2014-02-10 16:00:00	977	0.000114155	114.064	0.176
2014-02-10 17:00:00	978	0.000114155	120.888	0.115
2014-02-10 18:00:00	979	0.000114155	149.17	0.01
2014-02-10 19:00:00	980	0.000114155	165.9	0
2014-02-10 20:00:00	981	0.000114155	171.542	0
2014-02-10 21:00:00	982	0.000114155	190.432	0
2014-02-10 22:00:00	983	0.000114155	179.646	0
2014-02-10 23:00:00	984	0.000114155	125.699	0
2014-02-11	985	0.000114155	80.6378	0
2014-02-11 01:00:00	986	0.000114155	70.9659	0
2014-02-11 02:00:00	987	0.000114155	69.6915	0
2014-02-11 03:00:00	988	0.000114155	59.082	0
2014-02-11 04:00:00	989	0.000114155	58.3211	0
2014-02-11 05:00:00	990	0.000114155	61.0499	0
2014-02-11 06:00:00	991	0.000114155	69.0424	0
2014-02-11 07:00:00	992	0.000114155	110.657	0
2014-02-11 08:00:00	993	0.000114155	139.579	0.023
2014-02-11 09:00:00	994	0.000114155	193.725	0.124
2014-02-11 10:00:00	995	0.000114155	160.752	0.238
2014-02-11 11:00:00	996	0.000114155	110.76	0.203
2014-02-11 12:00:00	997	0.000114155	109.933	0.309
2014-02-11 13:00:00	998	0.000114155	114.361	0.479
2014-02-11 14:00:00	999	0.000114155	116.757	0.607
2014-02-11 15:00:00	1000	0.000114155	118.204	0.512
2014-02-11 16:00:00	1001	0.000114155	119.014	0.366
2014-02-11 17:00:00	1002	0.000114155	124.064	0.178
2014-02-11 18:00:00	1003	0.000114155	144.147	0.017
2014-02-11 19:00:00	1004	0.000114155	177.294	0
2014-02-11 20:00:00	1005	0.000114155	178.796	0
2014-02-11 21:00:00	1006	0.000114155	191.63	0
2014-02-11 22:00:00	1007	0.000114155	186.878	0
2014-02-11 23:00:00	1008	0.000114155	137.834	0
2014-02-12	1009	0.000114155	86.6358	0
2014-02-12 01:00:00	1010	0.000114155	72.1289	0
2014-02-12 02:00:00	1011	0.000114155	70.8377	0
2014-02-12 03:00:00	1012	0.000114155	60.317	0
2014-02-12 04:00:00	1013	0.000114155	59.8208	0
2014-02-12 05:00:00	1014	0.000114155	62.5985	0
2014-02-12 06:00:00	1015	0.000114155	70.4834	0
2014-02-12 07:00:00	1016	0.000114155	111.838	0
2014-02-12 08:00:00	1017	0.000114155	141.299	0.02
2014-02-12 09:00:00	1018	0.000114155	196.501	0.071
2014-02-12 10:00:00	1019	0.000114155	163.545	0.205
2014-02-12 11:00:00	1020	0.000114155	112.043	0.314
2014-02-12 12:00:00	1021	0.000114155	111.676	0.518
2014-02-12 13:00:00	1022	0.000114155	115.028	0.359
2014-02-12 14:00:00	1023	0.000114155	116.702	0.328
2014-02-12 15:00:00	1024	0.000114155	118.013	0.274
2014-02-12 16:00:00	1025	0.000114155	118.147	0.2
2014-02-12 17:00:00	1026	0.000114155	124.649	0.083
2014-02-12 18:00:00	1027	0.000114155	144.625	0.009
2014-02-12 19:00:00	1028	0.000114155	177.563	0
2014-02-12 20:00:00	1029	0.000114155	179.214	0
2014-02-12 21:00:00	1030	0.000114155	192.077	0
2014-02-12 22:00:00	1031	0.000114155	186.642	0
2014-02-12 23:00:00	1032	0.000114155	137.531	0
2014-02-13	1033	0.000114155	86.5524	0
2014-02-13 01:00:00	1034	0.000114155	69.1403	0
2014-02-13 02:00:00	1035	0.000114155	64.3135	0
2014-02-13 03:00:00	1036	0.000114155	59.5788	0
2014-02-13 04:00:00	1037	0.000114155	58.901	0
2014-02-13 05:00:00	1038	0.000114155	61.5821	0
2014-02-13 06:00:00	1039	0.000114155	76.8413	0
2014-02-13 07:00:00	1040	0.000114155	140.589	0
2014-02-13 08:00:00	1041	0.000114155	175.591	0.045
2014-02-13 09:00:00	1042	0.000114155	148.122	0.224
2014-02-13 10:00:00	1043	0.000114155	138.304	0.369
2014-02-13 11:00:00	1044	0.000114155	102.504	0.51
2014-02-13 12:00:00	1045	0.000114155	106.427	0.553
2014-02-13 13:00:00	1046	0.000114155	110.503	0.498
2014-02-13 14:00:00	1047	0.000114155	112.477	0.525
2014-02-13 15:00:00	1048	0.000114155	116.39	0.496
2014-02-13 16:00:00	1049	0.000114155	117.808	0.295
2014-02-13 17:00:00	1050	0.000114155	122.684	0.15
2014-02-13 18:00:00	1051	0.000114155	150.677	0.018
2014-02-13 19:00:00	1052	0.000114155	168.075	0
2014-02-13 20:00:00	1053	0.000114155	173.864	0
2014-02-13 21:00:00	1054	0.000114155	192.397	0
2014-02-13 22:00:00	1055	0.000114155	180.986	0
2014-02-13 23:00:00	1056	0.000114155	126.675	0
2014-02-14	1057	0.000114155	81.2013	0
2014-02-14 01:00:00	1058	0.000114155	68.4244	0
2014-02-14 02:00:00	1059	0.000114155	63.7677	0
2014-02-14 03:00:00	1060	0.000114155	59.1232	0
2014-02-14 04:00:00	1061	0.000114155	58.4874	0
2014-02-14 05:00:00	1062	0.000114155	61.2293	0
2014-02-14 06:00:00	1063	0.000114155	76.4991	0
2014-02-14 07:00:00	1064	0.000114155	140.249	0
2014-02-14 08:00:00	1065	0.000114155	176.867	0.04
2014-02-14 09:00:00	1066	0.000114155	152.53	0.231
2014-02-14 10:00:00	1067	0.000114155	147.35	0.4
2014-02-14 11:00:00	1068	0.000114155	115.021	0.413
2014-02-14 12:00:00	1069	0.000114155	122.252	0.522
2014-02-14 13:00:00	1070	0.000114155	130.159	0.552
2014-02-14 14:00:00	1071	0.000114155	133.083	0.614
2014-02-14 15:00:00	1072	0.000114155	131.816	0.519
2014-02-14 16:00:00	1073	0.000114155	128.171	0.368
2014-02-14 17:00:00	1074	0.000114155	131.02	0.161
2014-02-14 18:00:00	1075	0.000114155	156.828	0.02
2014-02-14 19:00:00	1076	0.000114155	172.753	0
2014-02-14 20:00:00	1077	0.000114155	177.53	0
2014-02-14 21:00:00	1078	0.000114155	194.987	0
2014-02-14 22:00:00	1079	0.000114155	182.833	0
2014-02-14 23:00:00	1080	0.000114155	128.318	0
2014-02-15	1081	0.000114155	82.6783	0
2014-02-15 01:00:00	1082	0.000114155	69.6202	0
2014-02-15 02:00:00	1083	0.000114155	64.7213	0
2014-02-15 03:00:00	1084	0.000114155	59.8483	0
2014-02-15 04:00:00	1085	0.000114155	59.1636	0
2014-02-15 05:00:00	1086	0.000114155	61.9123	0
2014-02-15 06:00:00	1087	0.000114155	77.242	0
2014-02-15 07:00:00	1088	0.000114155	141.157	0
2014-02-15 08:00:00	1089	0.000114155	178.327	0.051
2014-02-15 09:00:00	1090	0.000114155	153.267	0.231
2014-02-15 10:00:00	1091	0.000114155	147.296	0.414
2014-02-15 11:00:00	1092	0.000114155	113.225	0.559
2014-02-15 12:00:00	1093	0.000114155	118.542	0.369
2014-02-15 13:00:00	1094	0.000114155	126.126	0.428
2014-02-15 14:00:00	1095	0.000114155	130.988	0.397
2014-02-15 15:00:00	1096	0.000114155	134.862	0.279
2014-02-15 16:00:00	1097	0.000114155	136.425	0.153
2014-02-15 17:00:00	1098	0.000114155	140.98	0.122
2014-02-15 18:00:00	1099	0.000114155	162.758	0.015
2014-02-15 19:00:00	1100	0.000114155	176.917	0
2014-02-15 20:00:00	1101	0.000114155	181.673	0
2014-02-15 21:00:00	1102	0.000114155	199.366	0
2014-02-15 22:00:00	1103	0.000114155	187.424	0
2014-02-15 23:00:00	1104	0.000114155	132.751	0
2014-02-16	1105	0.000114155	86.5352	0
2014-02-16 01:00:00	1106	0.000114155	72.9358	0
2014-02-16 02:00:00	1107	0.000114155	67.4285	0
2014-02-16 03:00:00	1108	0.000114155	61.8527	0
2014-02-16 04:00:00	1109	0.000114155	60.6578	0
2014-02-16 05:00:00	1110	0.000114155	63.2293	0
2014-02-16 06:00:00	1111	0.000114155	78.4386	0
2014-02-16 07:00:00	1112	0.000114155	142.964	0
2014-02-16 08:00:00	1113	0.000114155	179.822	0.037
2014-02-16 09:00:00	1114	0.000114155	153.539	0.245
2014-02-16 10:00:00	1115	0.000114155	147.343	0.417
2014-02-16 11:00:00	1116	0.000114155	112	0.554
2014-02-16 12:00:00	1117	0.000114155	116.891	0.551
2014-02-16 13:00:00	1118	0.000114155	123.166	0.53
2014-02-16 14:00:00	1119	0.000114155	124.681	0.561
2014-02-16 15:00:00	1120	0.000114155	125.114	0.511
2014-02-16 16:00:00	1121	0.000114155	121.658	0.287
2014-02-16 17:00:00	1122	0.000114155	125.002	0.168
2014-02-16 18:00:00	1123	0.000114155	153.087	0.021
2014-02-16 19:00:00	1124	0.000114155	169.974	0
2014-02-16 20:00:00	1125	0.000114155	175.602	0
2014-02-16 21:00:00	1126	0.000114155	194.071	0
2014-02-16 22:00:00	1127	0.000114155	182.803	0
2014-02-16 23:00:00	1128	0.000114155	128.65	0
2014-02-17	1129	0.000114155	83.1544	0
2014-02-17 01:00:00	1130	0.000114155	70.2269	0
2014-02-17 02:00:00	1131	0.000114155	65.2853	0
2014-02-17 03:00:00	1132	0.000114155	60.3193	0
2014-02-17 04:00:00	1133	0.000114155	59.6686	0
2014-02-17 05:00:00	1134	0.000114155	62.2583	0
2014-02-17 06:00:00	1135	0.000114155	77.2458	0
2014-02-17 07:00:00	1136	0.000114155	140.665	0
2014-02-17 08:00:00	1137	0.000114155	176.394	0.018
2014-02-17 09:00:00	1138	0.000114155	149.36	0.054
2014-02-17 10:00:00	1139	0.000114155	141.671	0.071
2014-02-17 11:00:00	1140	0.000114155	106.868	0.102
2014-02-17 12:00:00	1141	0.000114155	111.651	0.11
2014-02-17 13:00:00	1142	0.000114155	119.662	0.118
2014-02-17 14:00:00	1143	0.000114155	124.741	0.111
2014-02-17 15:00:00	1144	0.000114155	126.62	0.095
2014-02-17 16:00:00	1145	0.000114155	126.925	0.106
2014-02-17 17:00:00	1146	0.000114155	131.581	0.074
2014-02-17 18:00:00	1147	0.000114155	154.015	0.01
2014-02-17 19:00:00	1148	0.000114155	171.785	0
2014-02-17 20:00:00	1149	0.000114155	176.981	0
2014-02-17 21:00:00	1150	0.000114155	195.148	0
2014-02-17 22:00:00	1151	0.000114155	183.694	0
2014-02-17 23:00:00	1152	0.000114155	129.692	0
2014-02-18	1153	0.000114155	84.0724	0
2014-02-18 01:00:00	1154	0.000114155	73.5804	0
2014-02-18 02:00:00	1155	0.000114155	71.6515	0
2014-02-18 03:00:00	1156	0.000114155	60.3091	0
2014-02-18 04:00:00	1157	0.000114155	59.3213	0
2014-02-18 05:00:00	1158	0.000114155	61.8933	0
2014-02-18 06:00:00	1159	0.000114155	69.7576	0
2014-02-18 07:00:00	1160	0.000114155	111.199	0
2014-02-18 08:00:00	1161	0.000114155	141.901	0.058
2014-02-18 09:00:00	1162	0.000114155	200.56	0.254
2014-02-18 10:00:00	1163	0.000114155	171.992	0.433
2014-02-18 11:00:00	1164	0.000114155	122.197	0.576
2014-02-18 12:00:00	1165	0.000114155	121.691	0.654
2014-02-18 13:00:00	1166	0.000114155	127.107	0.689
2014-02-18 14:00:00	1167	0.000114155	129.955	0.65
2014-02-18 15:00:00	1168	0.000114155	131.172	0.55
2014-02-18 16:00:00	1169	0.000114155	130.461	0.317
2014-02-18 17:00:00	1170	0.000114155	132.209	0.148
2014-02-18 18:00:00	1171	0.000114155	147.91	0.02
2014-02-18 19:00:00	1172	0.000114155	180.921	0
2014-02-18 20:00:00	1173	0.000114155	181.368	0
2014-02-18 21:00:00	1174	0.000114155	193.406	0
2014-02-18 22:00:00	1175	0.000114155	188.156	0
2014-02-18 23:00:00	1176	0.000114155	139.054	0
2014-02-19	1177	0.000114155	87.7532	0
2014-02-19 01:00:00	1178	0.000114155	73.0348	0
2014-02-19 02:00:00	1179	0.000114155	71.5453	0
2014-02-19 03:00:00	1180	0.000114155	60.7792	0
2014-02-19 04:00:00	1181	0.000114155	60.1366	0
2014-02-19 05:00:00	1182	0.000114155	62.8263	0
2014-02-19 06:00:00	1183	0.000114155	70.6834	0
2014-02-19 07:00:00	1184	0.000114155	110.077	0
2014-02-19 08:00:00	1185	0.000114155	141.238	0.041
2014-02-19 09:00:00	1186	0.000114155	196.166	0.145
2014-02-19 10:00:00	1187	0.000114155	163.395	0.305
2014-02-19 11:00:00	1188	0.000114155	113.196	0.34
2014-02-19 12:00:00	1189	0.000114155	110.118	0.282
2014-02-19 13:00:00	1190	0.000114155	112.824	0.353
2014-02-19 14:00:00	1191	0.000114155	115.554	0.318
2014-02-19 15:00:00	1192	0.000114155	116.093	0.301
2014-02-19 16:00:00	1193	0.000114155	115.1	0.163
2014-02-19 17:00:00	1194	0.000114155	121.652	0.104
2014-02-19 18:00:00	1195	0.000114155	140.162	0.014
2014-02-19 19:00:00	1196	0.000114155	175.213	0
2014-02-19 20:00:00	1197	0.000114155	177.095	0
2014-02-19 21:00:00	1198	0.000114155	189.999	0
2014-02-19 22:00:00	1199	0.000114155	184.694	0
2014-02-19 23:00:00	1200	0.000114155	135.802	0
2014-02-20	1201	0.000114155	85.0945	0
2014-02-20 01:00:00	1202	0.000114155	70.7764	0
2014-02-20 02:00:00	1203	0.000114155	69.7335	0
2014-02-20 03:00:00	1204	0.000114155	59.3396	0
2014-02-20 04:00:00	1205	0.000114155	58.7303	0
2014-02-20 05:00:00	1206	0.000114155	61.6088	0
2014-02-20 06:00:00	1207	0.000114155	69.7426	0
2014-02-20 07:00:00	1208	0.000114155	109.398	0
2014-02-20 08:00:00	1209	0.000114155	140.608	0.051
2014-02-20 09:00:00	1210	0.000114155	195.779	0.18
2014-02-20 10:00:00	1211	0.000114155	162.704	0.38
2014-02-20 11:00:00	1212	0.000114155	109.799	0.183
2014-02-20 12:00:00	1213	0.000114155	104.233	0.112
2014-02-20 13:00:00	1214	0.000114155	104.505	0.121
2014-02-20 14:00:00	1215	0.000114155	105.035	0.262
2014-02-20 15:00:00	1216	0.000114155	104.577	0.536
2014-02-20 16:00:00	1217	0.000114155	102.832	0.218
2014-02-20 17:00:00	1218	0.000114155	111.381	0.042
2014-02-20 18:00:00	1219	0.000114155	132.637	0.006
2014-02-20 19:00:00	1220	0.000114155	169.896	0
2014-02-20 20:00:00	1221	0.000114155	173.347	0
2014-02-20 21:00:00	1222	0.000114155	187.672	0
2014-02-20 22:00:00	1223	0.000114155	183.418	0
2014-02-20 23:00:00	1224	0.000114155	135.119	0
2014-02-21	1225	0.000114155	84.992	0
2014-02-21 01:00:00	1226	0.000114155	68.2991	0
2014-02-21 02:00:00	1227	0.000114155	64.1539	0
2014-02-21 03:00:00	1228	0.000114155	59.9296	0
2014-02-21 04:00:00	1229	0.000114155	59.7428	0
2014-02-21 05:00:00	1230	0.000114155	62.6713	0
2014-02-21 06:00:00	1231	0.000114155	77.9764	0
2014-02-21 07:00:00	1232	0.000114155	142.029	0
2014-02-21 08:00:00	1233	0.000114155	180.278	0.039
2014-02-21 09:00:00	1234	0.000114155	150.654	0.099
2014-02-21 10:00:00	1235	0.000114155	140.105	0.198
2014-02-21 11:00:00	1236	0.000114155	102.177	0.207
2014-02-21 12:00:00	1237	0.000114155	102.405	0.272
2014-02-21 13:00:00	1238	0.000114155	102.519	0.428
2014-02-21 14:00:00	1239	0.000114155	104.817	0.439
2014-02-21 15:00:00	1240	0.000114155	105.735	0.564
2014-02-21 16:00:00	1241	0.000114155	104.703	0.096
2014-02-21 17:00:00	1242	0.000114155	113.13	0.15
2014-02-21 18:00:00	1243	0.000114155	141.954	0.022
2014-02-21 19:00:00	1244	0.000114155	162.366	0
2014-02-21 20:00:00	1245	0.000114155	168.979	0
2014-02-21 21:00:00	1246	0.000114155	188.517	0
2014-02-21 22:00:00	1247	0.000114155	178.112	0
2014-02-21 23:00:00	1248	0.000114155	124.296	0
2014-02-22	1249	0.000114155	79.3438	0
2014-02-22 01:00:00	1250	0.000114155	67.0603	0
2014-02-22 02:00:00	1251	0.000114155	62.833	0
2014-02-22 03:00:00	1252	0.000114155	58.1604	0
2014-02-22 04:00:00	1253	0.000114155	57.5094	0
2014-02-22 05:00:00	1254	0.000114155	60.2901	0
2014-02-22 06:00:00	1255	0.000114155	75.6339	0
2014-02-22 07:00:00	1256	0.000114155	137.653	0
2014-02-22 08:00:00	1257	0.000114155	175.505	0.012
2014-02-22 09:00:00	1258	0.000114155	150.142	0.045
2014-02-22 10:00:00	1259	0.000114155	143.679	0.339
2014-02-22 11:00:00	1260	0.000114155	108.144	0.186
2014-02-22 12:00:00	1261	0.000114155	108.371	0.336
2014-02-22 13:00:00	1262	0.000114155	112.229	0.3
2014-02-22 14:00:00	1263	0.000114155	111.584	0.43
2014-02-22 15:00:00	1264	0.000114155	112.128	0.393
2014-02-22 16:00:00	1265	0.000114155	109.89	0.288
2014-02-22 17:00:00	1266	0.000114155	116.968	0.092
2014-02-22 18:00:00	1267	0.000114155	144.837	0.014
2014-02-22 19:00:00	1268	0.000114155	164.4	0
2014-02-22 20:00:00	1269	0.000114155	170.479	0
2014-02-22 21:00:00	1270	0.000114155	189.416	0
2014-02-22 22:00:00	1271	0.000114155	178.723	0
2014-02-22 23:00:00	1272	0.000114155	125.333	0
2014-02-23	1273	0.000114155	80.6104	0
2014-02-23 01:00:00	1274	0.000114155	68.2781	0
2014-02-23 02:00:00	1275	0.000114155	63.7148	0
2014-02-23 03:00:00	1276	0.000114155	59.0326	0
2014-02-23 04:00:00	1277	0.000114155	58.3692	0
2014-02-23 05:00:00	1278	0.000114155	61.2914	0
2014-02-23 06:00:00	1279	0.000114155	76.9334	0
2014-02-23 07:00:00	1280	0.000114155	139.919	0
2014-02-23 08:00:00	1281	0.000114155	178.74	0.066
2014-02-23 09:00:00	1282	0.000114155	150.33	0.254
2014-02-23 10:00:00	1283	0.000114155	141.013	0.37
2014-02-23 11:00:00	1284	0.000114155	104.152	0.565
2014-02-23 12:00:00	1285	0.000114155	106.236	0.638
2014-02-23 13:00:00	1286	0.000114155	108.538	0.717
2014-02-23 14:00:00	1287	0.000114155	110.493	0.405
2014-02-23 15:00:00	1288	0.000114155	110.585	0.212
2014-02-23 16:00:00	1289	0.000114155	108.994	0.325
2014-02-23 17:00:00	1290	0.000114155	116.182	0.192
2014-02-23 18:00:00	1291	0.000114155	143.317	0.03
2014-02-23 19:00:00	1292	0.000114155	162.694	0
2014-02-23 20:00:00	1293	0.000114155	168.699	0
2014-02-23 21:00:00	1294	0.000114155	187.566	0
2014-02-23 22:00:00	1295	0.000114155	176.893	0
2014-02-23 23:00:00	1296	0.000114155	123.634	0
2014-02-24	1297	0.000114155	79.262	0
2014-02-24 01:00:00	1298	0.000114155	67.2237	0
2014-02-24 02:00:00	1299	0.000114155	63.0061	0
2014-02-24 03:00:00	1300	0.000114155	58.3614	0
2014-02-24 04:00:00	1301	0.000114155	57.7207	0
2014-02-24 05:00:00	1302	0.000114155	60.4918	0
2014-02-24 06:00:00	1303	0.000114155	75.7746	0
2014-02-24 07:00:00	1304	0.000114155	137.469	0.001
2014-02-24 08:00:00	1305	0.000114155	174.449	0.088
2014-02-24 09:00:00	1306	0.000114155	149.102	0.281
2014-02-24 10:00:00	1307	0.000114155	141.242	0.466
2014-02-24 11:00:00	1308	0.000114155	105.968	0.608
2014-02-24 12:00:00	1309	0.000114155	105.767	0.697
2014-02-24 13:00:00	1310	0.000114155	106.129	0.582
2014-02-24 14:00:00	1311	0.000114155	107.618	0.666
2014-02-24 15:00:00	1312	0.000114155	106.832	0.543
2014-02-24 16:00:00	1313	0.000114155	106.228	0.314
2014-02-24 17:00:00	1314	0.000114155	114.501	0.146
2014-02-24 18:00:00	1315	0.000114155	142.436	0.023
2014-02-24 19:00:00	1316	0.000114155	161.634	0
2014-02-24 20:00:00	1317	0.000114155	167.714	0
2014-02-24 21:00:00	1318	0.000114155	186.818	0
2014-02-24 22:00:00	1319	0.000114155	176.273	0
2014-02-24 23:00:00	1320	0.000114155	122.81	0
2014-02-25	1321	0.000114155	78.47	0
2014-02-25 01:00:00	1322	0.000114155	69.123	0
2014-02-25 02:00:00	1323	0.000114155	68.3064	0
2014-02-25 03:00:00	1324	0.000114155	57.9074	0
2014-02-25 04:00:00	1325	0.000114155	57.206	0
2014-02-25 05:00:00	1326	0.000114155	59.9048	0
2014-02-25 06:00:00	1327	0.000114155	67.8654	0
2014-02-25 07:00:00	1328	0.000114155	107.443	0
2014-02-25 08:00:00	1329	0.000114155	138.926	0.019
2014-02-25 09:00:00	1330	0.000114155	194.867	0.057
2014-02-25 10:00:00	1331	0.000114155	165.844	0.078
2014-02-25 11:00:00	1332	0.000114155	116.36	0.102
2014-02-25 12:00:00	1333	0.000114155	113.605	0.214
2014-02-25 13:00:00	1334	0.000114155	115.824	0.148
2014-02-25 14:00:00	1335	0.000114155	116.59	0.537
2014-02-25 15:00:00	1336	0.000114155	116.624	0.534
2014-02-25 16:00:00	1337	0.000114155	114.999	0.345
2014-02-25 17:00:00	1338	0.000114155	121.29	0.152
2014-02-25 18:00:00	1339	0.000114155	139.884	0.024
2014-02-25 19:00:00	1340	0.000114155	175.343	0
2014-02-25 20:00:00	1341	0.000114155	177.07	0
2014-02-25 21:00:00	1342	0.000114155	189.862	0
2014-02-25 22:00:00	1343	0.000114155	185.279	0
2014-02-25 23:00:00	1344	0.000114155	136.532	0
2014-02-26	1345	0.000114155	85.554	0
2014-02-26 01:00:00	1346	0.000114155	71.1374	0
2014-02-26 02:00:00	1347	0.000114155	69.6531	0
2014-02-26 03:00:00	1348	0.000114155	58.9898	0
2014-02-26 04:00:00	1349	0.000114155	58.1313	0
2014-02-26 05:00:00	1350	0.000114155	60.7265	0
2014-02-26 06:00:00	1351	0.000114155	68.5902	0
2014-02-26 07:00:00	1352	0.000114155	107.854	0.001
2014-02-26 08:00:00	1353	0.000114155	139.754	0.08
2014-02-26 09:00:00	1354	0.000114155	195.85	0.2
2014-02-26 10:00:00	1355	0.000114155	166.5	0.38
2014-02-26 11:00:00	1356	0.000114155	116.678	0.315
2014-02-26 12:00:00	1357	0.000114155	112.73	0.323
2014-02-26 13:00:00	1358	0.000114155	115.063	0.191
2014-02-26 14:00:00	1359	0.000114155	115.532	0.665
2014-02-26 15:00:00	1360	0.000114155	116.756	0.245
2014-02-26 16:00:00	1361	0.000114155	116.277	0.077
2014-02-26 17:00:00	1362	0.000114155	123.1	0.17
2014-02-26 18:00:00	1363	0.000114155	141.997	0.028
2014-02-26 19:00:00	1364	0.000114155	177.064	0
2014-02-26 20:00:00	1365	0.000114155	179.055	0
2014-02-26 21:00:00	1366	0.000114155	192.115	0
2014-02-26 22:00:00	1367	0.000114155	186.93	0
2014-02-26 23:00:00	1368	0.000114155	137.923	0
2014-02-27	1369	0.000114155	86.8606	0
2014-02-27 01:00:00	1370	0.000114155	69.2817	0
2014-02-27 02:00:00	1371	0.000114155	64.2847	0
2014-02-27 03:00:00	1372	0.000114155	59.3366	0
2014-02-27 04:00:00	1373	0.000114155	58.5332	0
2014-02-27 05:00:00	1374	0.000114155	61.187	0
2014-02-27 06:00:00	1375	0.000114155	76.3979	0
2014-02-27 07:00:00	1376	0.000114155	138.175	0.002
2014-02-27 08:00:00	1377	0.000114155	176.138	0.093
2014-02-27 09:00:00	1378	0.000114155	151.008	0.243
2014-02-27 10:00:00	1379	0.000114155	144.197	0.447
2014-02-27 11:00:00	1380	0.000114155	109.632	0.609
2014-02-27 12:00:00	1381	0.000114155	112.635	0.605
2014-02-27 13:00:00	1382	0.000114155	116.005	0.644
2014-02-27 14:00:00	1383	0.000114155	118.055	0.698
2014-02-27 15:00:00	1384	0.000114155	119.037	0.527
2014-02-27 16:00:00	1385	0.000114155	117.958	0.365
2014-02-27 17:00:00	1386	0.000114155	124.109	0.225
2014-02-27 18:00:00	1387	0.000114155	150.356	0.037
2014-02-27 19:00:00	1388	0.000114155	168.679	0
2014-02-27 20:00:00	1389	0.000114155	174.232	0
2014-02-27 21:00:00	1390	0.000114155	192.831	0
2014-02-27 22:00:00	1391	0.000114155	181.78	0
2014-02-27 23:00:00	1392	0.000114155	127.951	0
2014-02-28	1393	0.000114155	82.7973	0
2014-02-28 01:00:00	1394	0.000114155	70.2391	0
2014-02-28 02:00:00	1395	0.000114155	65.5334	0
2014-02-28 03:00:00	1396	0.000114155	60.524	0
2014-02-28 04:00:00	1397	0.000114155	59.8288	0
2014-02-28 05:00:00	1398	0.000114155	62.603	0
2014-02-28 06:00:00	1399	0.000114155	77.9538	0
2014-02-28 07:00:00	1400	0.000114155	141.285	0.002
2014-02-28 08:00:00	1401	0.000114155	179.605	0.109
2014-02-28 09:00:00	1402	0.000114155	150.685	0.305
2014-02-28 10:00:00	1403	0.000114155	139.915	0.468
2014-02-28 11:00:00	1404	0.000114155	103.943	0.565
2014-02-28 12:00:00	1405	0.000114155	104.943	0.625
2014-02-28 13:00:00	1406	0.000114155	108.744	0.671
2014-02-28 14:00:00	1407	0.000114155	109.829	0.618
2014-02-28 15:00:00	1408	0.000114155	110.025	0.499
2014-02-28 16:00:00	1409	0.000114155	108.977	0.308
2014-02-28 17:00:00	1410	0.000114155	116.443	0.166
2014-02-28 18:00:00	1411	0.000114155	143.411	0.028
2014-02-28 19:00:00	1412	0.000114155	162.341	0
2014-02-28 20:00:00	1413	0.000114155	168.05	0
2014-02-28 21:00:00	1414	0.000114155	186.671	0
2014-02-28 22:00:00	1415	0.000114155	175.881	0
2014-02-28 23:00:00	1416	0.000114155	122.638	0
2014-03-01	1417	0.000114155	78.5071	0
2014-03-01 01:00:00	1418	0.000114155	66.8814	0
2014-03-01 02:00:00	1419	0.000114155	63.0657	0
2014-03-01 03:00:00	1420	0.000114155	58.6646	0
2014-03-01 04:00:00	1421	0.000114155	58.2607	0
2014-03-01 05:00:00	1422	0.000114155	61.3836	0
2014-03-01 06:00:00	1423	0.000114155	76.8903	0
2014-03-01 07:00:00	1424	0.000114155	139.104	0.001
2014-03-01 08:00:00	1425	0.000114155	176.396	0.047
2014-03-01 09:00:00	1426	0.000114155	147.628	0.131
2014-03-01 10:00:00	1427	0.000114155	137.421	0.203
2014-03-01 11:00:00	1428	0.000114155	101.184	0.307
2014-03-01 12:00:00	1429	0.000114155	107.569	0.379
2014-03-01 13:00:00	1430	0.000114155	111.966	0.355
2014-03-01 14:00:00	1431	0.000114155	117.554	0.286
2014-03-01 15:00:00	1432	0.000114155	125.927	0.278
2014-03-01 16:00:00	1433	0.000114155	126.988	0.196
2014-03-01 17:00:00	1434	0.000114155	128.773	0.185
2014-03-01 18:00:00	1435	0.000114155	152.192	0.044
2014-03-01 19:00:00	1436	0.000114155	169.6	0
2014-03-01 20:00:00	1437	0.000114155	175.431	0
2014-03-01 21:00:00	1438	0.000114155	193.734	0
2014-03-01 22:00:00	1439	0.000114155	181.971	0
2014-03-01 23:00:00	1440	0.000114155	128.015	0
2014-03-02	1441	0.000114155	82.537	0
2014-03-02 01:00:00	1442	0.000114155	69.6877	0
2014-03-02 02:00:00	1443	0.000114155	64.8301	0
2014-03-02 03:00:00	1444	0.000114155	60.0867	0
2014-03-02 04:00:00	1445	0.000114155	59.4001	0
2014-03-02 05:00:00	1446	0.000114155	61.9561	0
2014-03-02 06:00:00	1447	0.000114155	77.226	0
2014-03-02 07:00:00	1448	0.000114155	140.021	0.003
2014-03-02 08:00:00	1449	0.000114155	179.976	0.114
2014-03-02 09:00:00	1450	0.000114155	154.09	0.314
2014-03-02 10:00:00	1451	0.000114155	148.408	0.48
2014-03-02 11:00:00	1452	0.000114155	112.903	0.642
2014-03-02 12:00:00	1453	0.000114155	117.831	0.731
2014-03-02 13:00:00	1454	0.000114155	121.911	0.755
2014-03-02 14:00:00	1455	0.000114155	127.59	0.714
2014-03-02 15:00:00	1456	0.000114155	130.422	0.609
2014-03-02 16:00:00	1457	0.000114155	130.864	0.433
2014-03-02 17:00:00	1458	0.000114155	137.751	0.264
2014-03-02 18:00:00	1459	0.000114155	159.694	0.063
2014-03-02 19:00:00	1460	0.000114155	175.331	0
2014-03-02 20:00:00	1461	0.000114155	179.45	0
2014-03-02 21:00:00	1462	0.000114155	196.98	0
2014-03-02 22:00:00	1463	0.000114155	185.41	0
2014-03-02 23:00:00	1464	0.000114155	131.215	0
2014-03-03	1465	0.000114155	85.662	0
2014-03-03 01:00:00	1466	0.000114155	72.2455	0
2014-03-03 02:00:00	1467	0.000114155	66.857	0
2014-03-03 03:00:00	1468	0.000114155	61.5332	0
2014-03-03 04:00:00	1469	0.000114155	60.5776	0
2014-03-03 05:00:00	1470	0.000114155	63.0335	0
2014-03-03 06:00:00	1471	0.000114155	78.1584	0
2014-03-03 07:00:00	1472	0.000114155	139.179	0.004
2014-03-03 08:00:00	1473	0.000114155	181.235	0.12
2014-03-03 09:00:00	1474	0.000114155	154.107	0.239
2014-03-03 10:00:00	1475	0.000114155	146.535	0.372
2014-03-03 11:00:00	1476	0.000114155	113.393	0.212
2014-03-03 12:00:00	1477	0.000114155	119.309	0.236
2014-03-03 13:00:00	1478	0.000114155	126.6	0.231
2014-03-03 14:00:00	1479	0.000114155	126.406	0.13
2014-03-03 15:00:00	1480	0.000114155	123.092	0.117
2014-03-03 16:00:00	1481	0.000114155	121.414	0.438
2014-03-03 17:00:00	1482	0.000114155	125.882	0.259
2014-03-03 18:00:00	1483	0.000114155	152.93	0.063
2014-03-03 19:00:00	1484	0.000114155	172.174	0
2014-03-03 20:00:00	1485	0.000114155	178.041	0
2014-03-03 21:00:00	1486	0.000114155	196.494	0
2014-03-03 22:00:00	1487	0.000114155	185.26	0
2014-03-03 23:00:00	1488	0.000114155	130.986	0
2014-03-04	1489	0.000114155	85.1047	0
2014-03-04 01:00:00	1490	0.000114155	74.8535	0
2014-03-04 02:00:00	1491	0.000114155	73.2549	0
2014-03-04 03:00:00	1492	0.000114155	61.8741	0
2014-03-04 04:00:00	1493	0.000114155	61.1193	0
2014-03-04 05:00:00	1494	0.000114155	63.8502	0
2014-03-04 06:00:00	1495	0.000114155	71.8756	0
2014-03-04 07:00:00	1496	0.000114155	110.3	0.005
2014-03-04 08:00:00	1497	0.000114155	144.875	0.129
2014-03-04 09:00:00	1498	0.000114155	201.444	0.318
2014-03-04 10:00:00	1499	0.000114155	169.468	0.501
2014-03-04 11:00:00	1500	0.000114155	117.868	0.647
2014-03-04 12:00:00	1501	0.000114155	116.839	0.667
2014-03-04 13:00:00	1502	0.000114155	120.927	0.726
2014-03-04 14:00:00	1503	0.000114155	123.993	0.724
2014-03-04 15:00:00	1504	0.000114155	122.589	0.62
2014-03-04 16:00:00	1505	0.000114155	119.92	0.462
2014-03-04 17:00:00	1506	0.000114155	122.604	0.26
2014-03-04 18:00:00	1507	0.000114155	140.65	0.065
2014-03-04 19:00:00	1508	0.000114155	179.238	0
2014-03-04 20:00:00	1509	0.000114155	181.873	0
2014-03-04 21:00:00	1510	0.000114155	195.444	0
2014-03-04 22:00:00	1511	0.000114155	190.953	0
2014-03-04 23:00:00	1512	0.000114155	142.176	0
2014-03-05	1513	0.000114155	90.9873	0
2014-03-05 01:00:00	1514	0.000114155	76.2079	0
2014-03-05 02:00:00	1515	0.000114155	74.826	0
2014-03-05 03:00:00	1516	0.000114155	63.0322	0
2014-03-05 04:00:00	1517	0.000114155	61.7526	0
2014-03-05 05:00:00	1518	0.000114155	64.2827	0
2014-03-05 06:00:00	1519	0.000114155	72.1679	0
2014-03-05 07:00:00	1520	0.000114155	110.376	0.005
2014-03-05 08:00:00	1521	0.000114155	146.056	0.128
2014-03-05 09:00:00	1522	0.000114155	202.649	0.242
2014-03-05 10:00:00	1523	0.000114155	167.669	0.351
2014-03-05 11:00:00	1524	0.000114155	113.795	0.388
2014-03-05 12:00:00	1525	0.000114155	109.935	0.333
2014-03-05 13:00:00	1526	0.000114155	109.452	0.649
2014-03-05 14:00:00	1527	0.000114155	111.388	0.722
2014-03-05 15:00:00	1528	0.000114155	112.353	0.532
2014-03-05 16:00:00	1529	0.000114155	111.577	0.328
2014-03-05 17:00:00	1530	0.000114155	119.065	0.232
2014-03-05 18:00:00	1531	0.000114155	137.128	0.059
2014-03-05 19:00:00	1532	0.000114155	175.26	0
2014-03-05 20:00:00	1533	0.000114155	177.914	0
2014-03-05 21:00:00	1534	0.000114155	191.308	0
2014-03-05 22:00:00	1535	0.000114155	186.399	0
2014-03-05 23:00:00	1536	0.000114155	137.784	0
2014-03-06	1537	0.000114155	86.4757	0
2014-03-06 01:00:00	1538	0.000114155	68.8721	0
2014-03-06 02:00:00	1539	0.000114155	64.0306	0
2014-03-06 03:00:00	1540	0.000114155	59.445	0
2014-03-06 04:00:00	1541	0.000114155	59.0817	0
2014-03-06 05:00:00	1542	0.000114155	61.9541	0
2014-03-06 06:00:00	1543	0.000114155	77.2877	0
2014-03-06 07:00:00	1544	0.000114155	137.764	0.006
2014-03-06 08:00:00	1545	0.000114155	179.656	0.122
2014-03-06 09:00:00	1546	0.000114155	152.786	0.309
2014-03-06 10:00:00	1547	0.000114155	147.648	0.475
2014-03-06 11:00:00	1548	0.000114155	113.208	0.615
2014-03-06 12:00:00	1549	0.000114155	115.875	0.658
2014-03-06 13:00:00	1550	0.000114155	122.508	0.702
2014-03-06 14:00:00	1551	0.000114155	127.9	0.733
2014-03-06 15:00:00	1552	0.000114155	129.7	0.537
2014-03-06 16:00:00	1553	0.000114155	126.887	0.438
2014-03-06 17:00:00	1554	0.000114155	129.589	0.228
2014-03-06 18:00:00	1555	0.000114155	152.583	0.059
2014-03-06 19:00:00	1556	0.000114155	172.384	0
2014-03-06 20:00:00	1557	0.000114155	177.711	0
2014-03-06 21:00:00	1558	0.000114155	195.546	0
2014-03-06 22:00:00	1559	0.000114155	184.373	0
2014-03-06 23:00:00	1560	0.000114155	130.456	0
2014-03-07	1561	0.000114155	84.6798	0
2014-03-07 01:00:00	1562	0.000114155	71.7958	0
2014-03-07 02:00:00	1563	0.000114155	66.9291	0
2014-03-07 03:00:00	1564	0.000114155	61.3643	0
2014-03-07 04:00:00	1565	0.000114155	60.4274	0
2014-03-07 05:00:00	1566	0.000114155	63.0023	0
2014-03-07 06:00:00	1567	0.000114155	78.2681	0
2014-03-07 07:00:00	1568	0.000114155	139.565	0.007
2014-03-07 08:00:00	1569	0.000114155	182.064	0.144
2014-03-07 09:00:00	1570	0.000114155	156.935	0.344
2014-03-07 10:00:00	1571	0.000114155	151.625	0.528
2014-03-07 11:00:00	1572	0.000114155	119.408	0.667
2014-03-07 12:00:00	1573	0.000114155	125.9	0.712
2014-03-07 13:00:00	1574	0.000114155	131.322	0.665
2014-03-07 14:00:00	1575	0.000114155	134.367	0.667
2014-03-07 15:00:00	1576	0.000114155	132.312	0.596
2014-03-07 16:00:00	1577	0.000114155	128.106	0.466
2014-03-07 17:00:00	1578	0.000114155	131.196	0.254
2014-03-07 18:00:00	1579	0.000114155	153.652	0.067
2014-03-07 19:00:00	1580	0.000114155	172.347	0
2014-03-07 20:00:00	1581	0.000114155	177.649	0
2014-03-07 21:00:00	1582	0.000114155	195.175	0
2014-03-07 22:00:00	1583	0.000114155	183.21	0
2014-03-07 23:00:00	1584	0.000114155	128.799	0
2014-03-08	1585	0.000114155	83.2489	0
2014-03-08 01:00:00	1586	0.000114155	70.0029	0
2014-03-08 02:00:00	1587	0.000114155	64.9963	0
2014-03-08 03:00:00	1588	0.000114155	60.1165	0
2014-03-08 04:00:00	1589	0.000114155	59.3401	0
2014-03-08 05:00:00	1590	0.000114155	62.0802	0
2014-03-08 06:00:00	1591	0.000114155	77.1832	0
2014-03-08 07:00:00	1592	0.000114155	137.166	0.007
2014-03-08 08:00:00	1593	0.000114155	177.441	0.127
2014-03-08 09:00:00	1594	0.000114155	150.793	0.331
2014-03-08 10:00:00	1595	0.000114155	144.866	0.494
2014-03-08 11:00:00	1596	0.000114155	109.999	0.629
2014-03-08 12:00:00	1597	0.000114155	113.199	0.763
2014-03-08 13:00:00	1598	0.000114155	118.63	0.787
2014-03-08 14:00:00	1599	0.000114155	121.85	0.687
2014-03-08 15:00:00	1600	0.000114155	121.709	0.607
2014-03-08 16:00:00	1601	0.000114155	118.142	0.452
2014-03-08 17:00:00	1602	0.000114155	123.644	0.267
2014-03-08 18:00:00	1603	0.000114155	147.964	0.071
2014-03-08 19:00:00	1604	0.000114155	168.175	0.001
2014-03-08 20:00:00	1605	0.000114155	173.576	0
2014-03-08 21:00:00	1606	0.000114155	191.915	0
2014-03-08 22:00:00	1607	0.000114155	180.801	0
2014-03-08 23:00:00	1608	0.000114155	126.987	0
2014-03-09	1609	0.000114155	82.0451	0
2014-03-09 01:00:00	1610	0.000114155	69.2284	0
2014-03-09 02:00:00	1611	0.000114155	64.4271	0
2014-03-09 03:00:00	1612	0.000114155	59.8393	0
2014-03-09 04:00:00	1613	0.000114155	59.1644	0
2014-03-09 05:00:00	1614	0.000114155	62.0779	0
2014-03-09 06:00:00	1615	0.000114155	77.4309	0
2014-03-09 07:00:00	1616	0.000114155	137.908	0.009
2014-03-09 08:00:00	1617	0.000114155	178.038	0.152
2014-03-09 09:00:00	1618	0.000114155	149.612	0.334
2014-03-09 10:00:00	1619	0.000114155	140.345	0.503
2014-03-09 11:00:00	1620	0.000114155	104.916	0.634
2014-03-09 12:00:00	1621	0.000114155	109.304	0.737
2014-03-09 13:00:00	1622	0.000114155	110.74	0.677
2014-03-09 14:00:00	1623	0.000114155	113.036	0.693
2014-03-09 15:00:00	1624	0.000114155	114.604	0.612
2014-03-09 16:00:00	1625	0.000114155	111.119	0.461
2014-03-09 17:00:00	1626	0.000114155	119.085	0.282
2014-03-09 18:00:00	1627	0.000114155	144.921	0.076
2014-03-09 19:00:00	1628	0.000114155	166.187	0.001
2014-03-09 20:00:00	1629	0.000114155	172.269	0
2014-03-09 21:00:00	1630	0.000114155	191.271	0
2014-03-09 22:00:00	1631	0.000114155	180.475	0
2014-03-09 23:00:00	1632	0.000114155	126.499	0
2014-03-10	1633	0.000114155	81.3793	0
2014-03-10 01:00:00	1634	0.000114155	68.8863	0
2014-03-10 02:00:00	1635	0.000114155	64.2394	0
2014-03-10 03:00:00	1636	0.000114155	59.4418	0
2014-03-10 04:00:00	1637	0.000114155	59.1976	0
2014-03-10 05:00:00	1638	0.000114155	62.3352	0
2014-03-10 06:00:00	1639	0.000114155	77.8367	0
2014-03-10 07:00:00	1640	0.000114155	139.025	0.001
2014-03-10 08:00:00	1641	0.000114155	179.426	0.153
2014-03-10 09:00:00	1642	0.000114155	150.649	0.343
2014-03-10 10:00:00	1643	0.000114155	141.075	0.545
2014-03-10 11:00:00	1644	0.000114155	102.694	0.627
2014-03-10 12:00:00	1645	0.000114155	103.661	0.73
2014-03-10 13:00:00	1646	0.000114155	104.334	0.676
2014-03-10 14:00:00	1647	0.000114155	104.607	0.753
2014-03-10 15:00:00	1648	0.000114155	104.482	0.642
2014-03-10 16:00:00	1649	0.000114155	103.67	0.488
2014-03-10 17:00:00	1650	0.000114155	112.195	0.287
2014-03-10 18:00:00	1651	0.000114155	139.86	0.079
2014-03-10 19:00:00	1652	0.000114155	162.06	0.001
2014-03-10 20:00:00	1653	0.000114155	168.81	0
2014-03-10 21:00:00	1654	0.000114155	188.363	0
2014-03-10 22:00:00	1655	0.000114155	177.378	0
2014-03-10 23:00:00	1656	0.000114155	123.411	0
2014-03-11	1657	0.000114155	78.6643	0
2014-03-11 01:00:00	1658	0.000114155	69.1904	0
2014-03-11 02:00:00	1659	0.000114155	68.499	0
2014-03-11 03:00:00	1660	0.000114155	58.2216	0
2014-03-11 04:00:00	1661	0.000114155	57.6137	0
2014-03-11 05:00:00	1662	0.000114155	60.3795	0
2014-03-11 06:00:00	1663	0.000114155	68.4696	0
2014-03-11 07:00:00	1664	0.000114155	106.611	0.001
2014-03-11 08:00:00	1665	0.000114155	140.848	0.156
2014-03-11 09:00:00	1666	0.000114155	199.061	0.331
2014-03-11 10:00:00	1667	0.000114155	168.864	0.512
2014-03-11 11:00:00	1668	0.000114155	117.945	0.624
2014-03-11 12:00:00	1669	0.000114155	116.843	0.706
2014-03-11 13:00:00	1670	0.000114155	121.985	0.682
2014-03-11 14:00:00	1671	0.000114155	122.317	0.711
2014-03-11 15:00:00	1672	0.000114155	121.962	0.562
2014-03-11 16:00:00	1673	0.000114155	119.905	0.451
2014-03-11 17:00:00	1674	0.000114155	124.308	0.235
2014-03-11 18:00:00	1675	0.000114155	141.187	0.058
2014-03-11 19:00:00	1676	0.000114155	178.59	0.001
2014-03-11 20:00:00	1677	0.000114155	180.596	0
2014-03-11 21:00:00	1678	0.000114155	193.423	0
2014-03-11 22:00:00	1679	0.000114155	189.552	0
2014-03-11 23:00:00	1680	0.000114155	140.93	0
2014-03-12	1681	0.000114155	89.8309	0
2014-03-12 01:00:00	1682	0.000114155	74.4804	0
2014-03-12 02:00:00	1683	0.000114155	62.4646	0
2014-03-12 03:00:00	1684	0.000114155	61.9768	0
2014-03-12 04:00:00	1685	0.000114155	64.529	0
2014-03-12 05:00:00	1686	0.000114155	72.3037	0
2014-03-12 06:00:00	1687	0.000114155	114.239	0
2014-03-12 07:00:00	1688	0.000114155	148.603	0.002
2014-03-12 08:00:00	1689	0.000114155	201.436	0.143
2014-03-12 09:00:00	1690	0.000114155	172.028	0.297
2014-03-12 10:00:00	1691	0.000114155	123.994	0.292
2014-03-12 11:00:00	1692	0.000114155	124.263	0.344
2014-03-12 12:00:00	1693	0.000114155	130.136	0.628
2014-03-12 13:00:00	1694	0.000114155	136.106	0.589
2014-03-12 14:00:00	1695	0.000114155	140.986	0.737
2014-03-12 15:00:00	1696	0.000114155	142.878	0.6
2014-03-12 16:00:00	1697	0.000114155	150.846	0.496
2014-03-12 17:00:00	1698	0.000114155	164.196	0.285
2014-03-12 18:00:00	1699	0.000114155	189.036	0.059
2014-03-12 19:00:00	1700	0.000114155	193.3	0.001
2014-03-12 20:00:00	1701	0.000114155	203.79	0
2014-03-12 21:00:00	1702	0.000114155	196.763	0
2014-03-12 22:00:00	1703	0.000114155	146.718	0
2014-03-12 23:00:00	1704	0.000114155	94.8167	0
2014-03-13	1705	0.000114155	79.1813	0
2014-03-13 01:00:00	1706	0.000114155	70.5184	0
2014-03-13 02:00:00	1707	0.000114155	63.7753	0
2014-03-13 03:00:00	1708	0.000114155	61.871	0
2014-03-13 04:00:00	1709	0.000114155	63.8718	0
2014-03-13 05:00:00	1710	0.000114155	78.6678	0
2014-03-13 06:00:00	1711	0.000114155	142.848	0
2014-03-13 07:00:00	1712	0.000114155	180.142	0.004
2014-03-13 08:00:00	1713	0.000114155	152.798	0.132
2014-03-13 09:00:00	1714	0.000114155	147.264	0.256
2014-03-13 10:00:00	1715	0.000114155	113.039	0.553
2014-03-13 11:00:00	1716	0.000114155	116.751	0.642
2014-03-13 12:00:00	1717	0.000114155	123.383	0.696
2014-03-13 13:00:00	1718	0.000114155	128.029	0.514
2014-03-13 14:00:00	1719	0.000114155	135.078	0.651
2014-03-13 15:00:00	1720	0.000114155	137.755	0.66
2014-03-13 16:00:00	1721	0.000114155	146.828	0.5
2014-03-13 17:00:00	1722	0.000114155	168.199	0.305
2014-03-13 18:00:00	1723	0.000114155	175.246	0.08
2014-03-13 19:00:00	1724	0.000114155	184.081	0.002
2014-03-13 20:00:00	1725	0.000114155	200.768	0
2014-03-13 21:00:00	1726	0.000114155	188.9	0
2014-03-13 22:00:00	1727	0.000114155	134.468	0
2014-03-13 23:00:00	1728	0.000114155	88.1434	0
2014-03-14	1729	0.000114155	74.4243	0
2014-03-14 01:00:00	1730	0.000114155	68.8893	0
2014-03-14 02:00:00	1731	0.000114155	63.0675	0
2014-03-14 03:00:00	1732	0.000114155	61.2262	0
2014-03-14 04:00:00	1733	0.000114155	63.4641	0
2014-03-14 05:00:00	1734	0.000114155	78.6033	0
2014-03-14 06:00:00	1735	0.000114155	142.897	0
2014-03-14 07:00:00	1736	0.000114155	180.43	0.006
2014-03-14 08:00:00	1737	0.000114155	151.205	0.127
2014-03-14 09:00:00	1738	0.000114155	144.534	0.343
2014-03-14 10:00:00	1739	0.000114155	110.018	0.523
2014-03-14 11:00:00	1740	0.000114155	114.526	0.633
2014-03-14 12:00:00	1741	0.000114155	120.147	0.691
2014-03-14 13:00:00	1742	0.000114155	122.784	0.721
2014-03-14 14:00:00	1743	0.000114155	129.969	0.715
2014-03-14 15:00:00	1744	0.000114155	132.871	0.616
2014-03-14 16:00:00	1745	0.000114155	135.719	0.455
2014-03-14 17:00:00	1746	0.000114155	155.692	0.303
2014-03-14 18:00:00	1747	0.000114155	166.825	0.085
2014-03-14 19:00:00	1748	0.000114155	178.483	0.002
2014-03-14 20:00:00	1749	0.000114155	196.117	0
2014-03-14 21:00:00	1750	0.000114155	184.596	0
2014-03-14 22:00:00	1751	0.000114155	130.259	0
2014-03-14 23:00:00	1752	0.000114155	84.5038	0
2014-03-15	1753	0.000114155	71.405	0
2014-03-15 01:00:00	1754	0.000114155	65.9699	0
2014-03-15 02:00:00	1755	0.000114155	60.6319	0
2014-03-15 03:00:00	1756	0.000114155	59.6466	0
2014-03-15 04:00:00	1757	0.000114155	62.5805	0
2014-03-15 05:00:00	1758	0.000114155	78.0633	0
2014-03-15 06:00:00	1759	0.000114155	142.323	0
2014-03-15 07:00:00	1760	0.000114155	180.097	0.009
2014-03-15 08:00:00	1761	0.000114155	150.458	0.181
2014-03-15 09:00:00	1762	0.000114155	143.627	0.381
2014-03-15 10:00:00	1763	0.000114155	108.367	0.56
2014-03-15 11:00:00	1764	0.000114155	111.927	0.649
2014-03-15 12:00:00	1765	0.000114155	116.071	0.708
2014-03-15 13:00:00	1766	0.000114155	116.418	0.727
2014-03-15 14:00:00	1767	0.000114155	118.528	0.748
2014-03-15 15:00:00	1768	0.000114155	117.645	0.668
2014-03-15 16:00:00	1769	0.000114155	124.2	0.486
2014-03-15 17:00:00	1770	0.000114155	151.242	0.269
2014-03-15 18:00:00	1771	0.000114155	164.182	0.078
2014-03-15 19:00:00	1772	0.000114155	177.386	0.002
2014-03-15 20:00:00	1773	0.000114155	195.951	0
2014-03-15 21:00:00	1774	0.000114155	184.844	0
2014-03-15 22:00:00	1775	0.000114155	130.716	0
2014-03-15 23:00:00	1776	0.000114155	85.0982	0
2014-03-16	1777	0.000114155	72.5225	0
2014-03-16 01:00:00	1778	0.000114155	67.8408	0
2014-03-16 02:00:00	1779	0.000114155	62.7978	0
2014-03-16 03:00:00	1780	0.000114155	61.7182	0
2014-03-16 04:00:00	1781	0.000114155	64.3032	0
2014-03-16 05:00:00	1782	0.000114155	79.8659	0
2014-03-16 06:00:00	1783	0.000114155	146.639	0
2014-03-16 07:00:00	1784	0.000114155	184.614	0.011
2014-03-16 08:00:00	1785	0.000114155	153.505	0.19
2014-03-16 09:00:00	1786	0.000114155	143.434	0.395
2014-03-16 10:00:00	1787	0.000114155	104.154	0.58
2014-03-16 11:00:00	1788	0.000114155	106.718	0.722
2014-03-16 12:00:00	1789	0.000114155	107.923	0.807
2014-03-16 13:00:00	1790	0.000114155	108.65	0.828
2014-03-16 14:00:00	1791	0.000114155	110.978	0.781
2014-03-16 15:00:00	1792	0.000114155	111.708	0.64
2014-03-16 16:00:00	1793	0.000114155	120.166	0.513
2014-03-16 17:00:00	1794	0.000114155	146.972	0.284
2014-03-16 18:00:00	1795	0.000114155	160.357	0.079
2014-03-16 19:00:00	1796	0.000114155	173.083	0.002
2014-03-16 20:00:00	1797	0.000114155	191.312	0
2014-03-16 21:00:00	1798	0.000114155	180.046	0
2014-03-16 22:00:00	1799	0.000114155	126.249	0
2014-03-16 23:00:00	1800	0.000114155	81.194	0
2014-03-17	1801	0.000114155	68.5097	0
2014-03-17 01:00:00	1802	0.000114155	63.9577	0
2014-03-17 02:00:00	1803	0.000114155	59.3767	0
2014-03-17 03:00:00	1804	0.000114155	58.7649	0
2014-03-17 04:00:00	1805	0.000114155	61.4601	0
2014-03-17 05:00:00	1806	0.000114155	76.3575	0
2014-03-17 06:00:00	1807	0.000114155	139.757	0
2014-03-17 07:00:00	1808	0.000114155	175.872	0.014
2014-03-17 08:00:00	1809	0.000114155	148.112	0.194
2014-03-17 09:00:00	1810	0.000114155	141.226	0.401
2014-03-17 10:00:00	1811	0.000114155	106.114	0.585
2014-03-17 11:00:00	1812	0.000114155	108.639	0.692
2014-03-17 12:00:00	1813	0.000114155	112.234	0.813
2014-03-17 13:00:00	1814	0.000114155	115.575	0.806
2014-03-17 14:00:00	1815	0.000114155	118.613	0.74
2014-03-17 15:00:00	1816	0.000114155	120.237	0.632
2014-03-17 16:00:00	1817	0.000114155	124.047	0.486
2014-03-17 17:00:00	1818	0.000114155	148.958	0.276
2014-03-17 18:00:00	1819	0.000114155	162.495	0.063
2014-03-17 19:00:00	1820	0.000114155	174.928	0.002
2014-03-17 20:00:00	1821	0.000114155	193.364	0
2014-03-17 21:00:00	1822	0.000114155	182.283	0
2014-03-17 22:00:00	1823	0.000114155	128.271	0
2014-03-17 23:00:00	1824	0.000114155	82.9481	0
2014-03-18	1825	0.000114155	70.3128	0
2014-03-18 01:00:00	1826	0.000114155	71.6014	0
2014-03-18 02:00:00	1827	0.000114155	60.6551	0
2014-03-18 03:00:00	1828	0.000114155	60.0315	0
2014-03-18 04:00:00	1829	0.000114155	62.8842	0
2014-03-18 05:00:00	1830	0.000114155	70.7967	0
2014-03-18 06:00:00	1831	0.000114155	112.44	0
2014-03-18 07:00:00	1832	0.000114155	144.087	0.017
2014-03-18 08:00:00	1833	0.000114155	198.902	0.201
2014-03-18 09:00:00	1834	0.000114155	166.374	0.407
2014-03-18 10:00:00	1835	0.000114155	113.78	0.591
2014-03-18 11:00:00	1836	0.000114155	108.941	0.733
2014-03-18 12:00:00	1837	0.000114155	111.58	0.815
2014-03-18 13:00:00	1838	0.000114155	111.768	0.837
2014-03-18 14:00:00	1839	0.000114155	114.791	0.729
2014-03-18 15:00:00	1840	0.000114155	116.817	0.603
2014-03-18 16:00:00	1841	0.000114155	124.798	0.478
2014-03-18 17:00:00	1842	0.000114155	143.139	0.228
2014-03-18 18:00:00	1843	0.000114155	172.72	0.098
2014-03-18 19:00:00	1844	0.000114155	180.897	0.003
2014-03-18 20:00:00	1845	0.000114155	193.186	0
2014-03-18 21:00:00	1846	0.000114155	188.596	0
2014-03-18 22:00:00	1847	0.000114155	139.934	0
2014-03-18 23:00:00	1848	0.000114155	88.5252	0
2014-03-19	1849	0.000114155	73.3845	0
2014-03-19 01:00:00	1850	0.000114155	71.6301	0
2014-03-19 02:00:00	1851	0.000114155	60.5001	0
2014-03-19 03:00:00	1852	0.000114155	59.7842	0
2014-03-19 04:00:00	1853	0.000114155	62.5614	0
2014-03-19 05:00:00	1854	0.000114155	70.3166	0
2014-03-19 06:00:00	1855	0.000114155	111.335	0
2014-03-19 07:00:00	1856	0.000114155	141.906	0.006
2014-03-19 08:00:00	1857	0.000114155	195.611	0.075
2014-03-19 09:00:00	1858	0.000114155	164.011	0.282
2014-03-19 10:00:00	1859	0.000114155	113.542	0.527
2014-03-19 11:00:00	1860	0.000114155	110.88	0.66
2014-03-19 12:00:00	1861	0.000114155	113.255	0.735
2014-03-19 13:00:00	1862	0.000114155	115.83	0.733
2014-03-19 14:00:00	1863	0.000114155	117.845	0.748
2014-03-19 15:00:00	1864	0.000114155	118.025	0.59
2014-03-19 16:00:00	1865	0.000114155	125.763	0.473
2014-03-19 17:00:00	1866	0.000114155	143.396	0.268
2014-03-19 18:00:00	1867	0.000114155	172.461	0.079
2014-03-19 19:00:00	1868	0.000114155	179.089	0.003
2014-03-19 20:00:00	1869	0.000114155	193.388	0
2014-03-19 21:00:00	1870	0.000114155	187.709	0
2014-03-19 22:00:00	1871	0.000114155	138.689	0
2014-03-19 23:00:00	1872	0.000114155	87.7985	0
2014-03-20	1873	0.000114155	72.9629	0
2014-03-20 01:00:00	1874	0.000114155	64.9864	0
2014-03-20 02:00:00	1875	0.000114155	59.999	0
2014-03-20 03:00:00	1876	0.000114155	59.3311	0
2014-03-20 04:00:00	1877	0.000114155	61.8092	0
2014-03-20 05:00:00	1878	0.000114155	76.7918	0
2014-03-20 06:00:00	1879	0.000114155	140.546	0
2014-03-20 07:00:00	1880	0.000114155	177.554	0.021
2014-03-20 08:00:00	1881	0.000114155	149.529	0.205
2014-03-20 09:00:00	1882	0.000114155	142.815	0.388
2014-03-20 10:00:00	1883	0.000114155	107.782	0.561
2014-03-20 11:00:00	1884	0.000114155	110.042	0.657
2014-03-20 12:00:00	1885	0.000114155	113.057	0.645
2014-03-20 13:00:00	1886	0.000114155	115.593	0.711
2014-03-20 14:00:00	1887	0.000114155	116.605	0.719
2014-03-20 15:00:00	1888	0.000114155	115.852	0.581
2014-03-20 16:00:00	1889	0.000114155	123.716	0.397
2014-03-20 17:00:00	1890	0.000114155	149.327	0.277
2014-03-20 18:00:00	1891	0.000114155	162.078	0.017
2014-03-20 19:00:00	1892	0.000114155	172.537	0.001
2014-03-20 20:00:00	1893	0.000114155	192.556	0
2014-03-20 21:00:00	1894	0.000114155	181.21	0
2014-03-20 22:00:00	1895	0.000114155	127.372	0
2014-03-20 23:00:00	1896	0.000114155	82.2842	0
2014-03-21	1897	0.000114155	69.686	0
2014-03-21 01:00:00	1898	0.000114155	65.0787	0
2014-03-21 02:00:00	1899	0.000114155	60.365	0
2014-03-21 03:00:00	1900	0.000114155	59.7869	0
2014-03-21 04:00:00	1901	0.000114155	62.6565	0
2014-03-21 05:00:00	1902	0.000114155	77.8323	0
2014-03-21 06:00:00	1903	0.000114155	142.402	0
2014-03-21 07:00:00	1904	0.000114155	180.605	0.008
2014-03-21 08:00:00	1905	0.000114155	150.2	0.046
2014-03-21 09:00:00	1906	0.000114155	140.224	0.104
2014-03-21 10:00:00	1907	0.000114155	104.142	0.164
2014-03-21 11:00:00	1908	0.000114155	105.407	0.216
2014-03-21 12:00:00	1909	0.000114155	110.406	0.45
2014-03-21 13:00:00	1910	0.000114155	112.906	0.316
2014-03-21 14:00:00	1911	0.000114155	113.306	0.341
2014-03-21 15:00:00	1912	0.000114155	112.495	0.347
2014-03-21 16:00:00	1913	0.000114155	120.244	0.196
2014-03-21 17:00:00	1914	0.000114155	145.496	0.262
2014-03-21 18:00:00	1915	0.000114155	158.821	0.09
2014-03-21 19:00:00	1916	0.000114155	169.919	0.003
2014-03-21 20:00:00	1917	0.000114155	190.018	0
2014-03-21 21:00:00	1918	0.000114155	178.792	0
2014-03-21 22:00:00	1919	0.000114155	125.147	0
2014-03-21 23:00:00	1920	0.000114155	79.9638	0
2014-03-22	1921	0.000114155	67.5094	0
2014-03-22 01:00:00	1922	0.000114155	63.2563	0
2014-03-22 02:00:00	1923	0.000114155	58.6456	0
2014-03-22 03:00:00	1924	0.000114155	58.0595	0
2014-03-22 04:00:00	1925	0.000114155	60.9799	0
2014-03-22 05:00:00	1926	0.000114155	76.2462	0
2014-03-22 06:00:00	1927	0.000114155	139.794	0
2014-03-22 07:00:00	1928	0.000114155	175.846	0.015
2014-03-22 08:00:00	1929	0.000114155	146.975	0.099
2014-03-22 09:00:00	1930	0.000114155	136.492	0.127
2014-03-22 10:00:00	1931	0.000114155	100.994	0.163
2014-03-22 11:00:00	1932	0.000114155	102.205	0.207
2014-03-22 12:00:00	1933	0.000114155	102.968	0.182
2014-03-22 13:00:00	1934	0.000114155	105.653	0.19
2014-03-22 14:00:00	1935	0.000114155	106.748	0.201
2014-03-22 15:00:00	1936	0.000114155	105.254	0.157
2014-03-22 16:00:00	1937	0.000114155	114.911	0.133
2014-03-22 17:00:00	1938	0.000114155	141.204	0.134
2014-03-22 18:00:00	1939	0.000114155	154.838	0.061
2014-03-22 19:00:00	1940	0.000114155	165.801	0.002
2014-03-22 20:00:00	1941	0.000114155	186.483	0
2014-03-22 21:00:00	1942	0.000114155	175.598	0
2014-03-22 22:00:00	1943	0.000114155	122.264	0
2014-03-22 23:00:00	1944	0.000114155	77.7468	0
2014-03-23	1945	0.000114155	66.0861	0
2014-03-23 01:00:00	1946	0.000114155	62.0942	0
2014-03-23 02:00:00	1947	0.000114155	57.3313	0
2014-03-23 03:00:00	1948	0.000114155	56.888	0
2014-03-23 04:00:00	1949	0.000114155	59.6783	0
2014-03-23 05:00:00	1950	0.000114155	74.7513	0
2014-03-23 06:00:00	1951	0.000114155	138.208	0
2014-03-23 07:00:00	1952	0.000114155	171.457	0.015
2014-03-23 08:00:00	1953	0.000114155	144.974	0.11
2014-03-23 09:00:00	1954	0.000114155	135.475	0.155
2014-03-23 10:00:00	1955	0.000114155	98.4626	0.453
2014-03-23 11:00:00	1956	0.000114155	98.7583	0.759
2014-03-23 12:00:00	1957	0.000114155	100.235	0.842
2014-03-23 13:00:00	1958	0.000114155	103.316	0.764
2014-03-23 14:00:00	1959	0.000114155	103.183	0.744
2014-03-23 15:00:00	1960	0.000114155	101.743	0.642
2014-03-23 16:00:00	1961	0.000114155	111.152	0.504
2014-03-23 17:00:00	1962	0.000114155	138.304	0.276
2014-03-23 18:00:00	1963	0.000114155	152.915	0.078
2014-03-23 19:00:00	1964	0.000114155	164.935	0.003
2014-03-23 20:00:00	1965	0.000114155	186.099	0
2014-03-23 21:00:00	1966	0.000114155	175.64	0
2014-03-23 22:00:00	1967	0.000114155	122.367	0
2014-03-23 23:00:00	1968	0.000114155	78.1416	0
2014-03-24	1969	0.000114155	66.54	0
2014-03-24 01:00:00	1970	0.000114155	62.6635	0
2014-03-24 02:00:00	1971	0.000114155	58.2023	0
2014-03-24 03:00:00	1972	0.000114155	57.7098	0
2014-03-24 04:00:00	1973	0.000114155	60.4802	0
2014-03-24 05:00:00	1974	0.000114155	75.8132	0
2014-03-24 06:00:00	1975	0.000114155	139.633	0
2014-03-24 07:00:00	1976	0.000114155	174.811	0.021
2014-03-24 08:00:00	1977	0.000114155	146.787	0.14
2014-03-24 09:00:00	1978	0.000114155	137.94	0.282
2014-03-24 10:00:00	1979	0.000114155	100.21	0.544
2014-03-24 11:00:00	1980	0.000114155	100.037	0.681
2014-03-24 12:00:00	1981	0.000114155	100.889	0.747
2014-03-24 13:00:00	1982	0.000114155	101.243	0.763
2014-03-24 14:00:00	1983	0.000114155	101.191	0.756
2014-03-24 15:00:00	1984	0.000114155	100.683	0.491
2014-03-24 16:00:00	1985	0.000114155	109.367	0.474
2014-03-24 17:00:00	1986	0.000114155	136.795	0.194
2014-03-24 18:00:00	1987	0.000114155	151.593	0.105
2014-03-24 19:00:00	1988	0.000114155	163.762	0.005
2014-03-24 20:00:00	1989	0.000114155	185.321	0
2014-03-24 21:00:00	1990	0.000114155	174.262	0
2014-03-24 22:00:00	1991	0.000114155	118.437	0
2014-03-24 23:00:00	1992	0.000114155	76.8736	0
2014-03-25	1993	0.000114155	65.6671	0
2014-03-25 01:00:00	1994	0.000114155	67.7768	0
2014-03-25 02:00:00	1995	0.000114155	57.6553	0
2014-03-25 03:00:00	1996	0.000114155	57.1592	0
2014-03-25 04:00:00	1997	0.000114155	60.0429	0
[truncated: 6,763 more rows]

## Sheet: Natural Gas
Estimate the Distribution of Natural Gas Price
# of data	125
Month		Gas Rates ($/Thermal)		Gas Price
2004-01-01	0.008	0.95612		# of bins	20
2004-02-06	0.008	0.7692		Max	1.71491
2004-03-05	0.008	0.63643		Min	0.63643
2004-04-07	0.008	0.70064		Interval	0.0567621
2004-05-01	0.008	0.72023			16				1				29.3001	1
2004-06-07	0.008	0.79231		Bin #	Index	Value		Avg	Prob		Index	Gas Rates ($/Thermal)	($/kwh)	Prob	m_p
2004-07-01	0.008	0.78947		1	1	0.63643	0.579668	0.63643	0.008		1	0.63643	0.0217211	0.008	0.0315004
2004-08-06	0.008	0.93691		2	2	0.693192	0.63643	0.664811	0.048		2	0.664811	0.0226897	0.048
2004-09-08	0.008	0.91236		3	3	0.749954	0.693192	0.721573	0.08		3	0.721573	0.024627	0.08
2004-10-07	0.008	0.88166		4	4	0.806716	0.749954	0.778335	0.232		4	0.778335	0.0265642	0.232
2004-11-01	0.008	0.99706		5	5	0.863478	0.806716	0.835097	0.112		5	0.835097	0.0285015	0.112
2004-12-07	0.008	1.03401		6	6	0.920241	0.863478	0.891859	0.12		6	0.891859	0.0304388	0.12
2005-01-01	0.008	1.01968		7	7	0.977003	0.920241	0.948622	0.064		7	0.948622	0.032376	0.064
2005-02-07	0.008	0.91193		8	8	1.03376	0.977003	1.00538	0.096		8	1.00538	0.0343133	0.096
2005-03-01	0.008	0.84982		9	9	1.09053	1.03376	1.06215	0.088		9	1.06215	0.0362506	0.088
2005-04-07	0.008	0.96849		10	10	1.14729	1.09053	1.11891	0.048		10	1.11891	0.0381878	0.048
2005-05-06	0.008	0.99474		11	11	1.20405	1.14729	1.17567	0.016		11	1.17567	0.0401251	0.016
2005-06-07	0.008	0.97843		12	12	1.26081	1.20405	1.23243	0.016		12	1.23243	0.0420624	0.016
2005-07-01	0.008	1.00236		13	13	1.31758	1.26081	1.28919	0.024		13	1.28919	0.0439996	0.024
2005-08-05	0.008	1.01795		14	0	1.37434	1.31758	1.34596	0		14	1.45948	0.0498114	0.016
2005-09-08	0.008	1.19931		15	0	1.4311	1.37434	1.40272	0		15	1.51624	0.0517487	0.024
2005-10-07	0.008	1.52538		16	14	1.48786	1.4311	1.45948	0.016		16	1.68653	0.0575605	0.008
2005-11-01	0.008	1.52957		17	15	1.54462	1.48786	1.51624	0.024		17
2005-12-07	0.008	1.25923		18	0	1.60139	1.54462	1.573	0		18
2006-01-01	0.008	1.51183		19	0	1.65815	1.60139	1.62977	0		19
2006-02-07	0.008	1.13459		20	16	1.71491	1.65815	1.68653	0.008		20
2006-03-07	0.008	1.05858
2006-04-01	0.008	1.08427
2006-05-05	0.008	1.00149
2006-06-07	0.008	0.91663
2006-07-07	0.008	0.95746
2006-08-07	0.008	1.06288
2006-09-01	0.008	1.0835
2006-10-06	0.008	0.90061
2006-11-01	0.008	1.0553
2006-12-07	0.008	1.02863
2007-01-01	0.008	1.02618
2007-02-07	0.008	1.01437
2007-03-01	0.008	1.05771
2007-04-01	0.008	1.0526
2007-05-01	0.008	1.14169
2007-06-07	0.008	1.27976
2007-07-01	0.008	1.24915
2007-08-01	0.008	1.09115
2007-09-10	0.008	1.00621
2007-10-05	0.008	1.07511
2007-11-01	0.008	1.08944
2007-12-07	0.008	1.16613
2008-01-01	0.008	1.05177
2008-02-07	0.008	1.09977
2008-03-01	0.008	1.1323
2008-04-01	0.008	1.27619
2008-05-01	0.008	1.30748
2008-06-01	0.008	1.45266
2008-07-01	0.008	1.71491
2008-08-01	0.008	1.45138
2008-09-01	0.008	1.12734
2008-10-01	0.008	1.0171
2008-11-01	0.008	0.92861
2008-12-01	0.008	0.83012
2009-01-01	0.008	0.97339
2009-02-01	0.008	0.91655
2009-03-01	0.008	0.78847
2009-04-01	0.008	0.77018
2009-05-01	0.008	0.66002
2009-06-01	0.008	0.75582
2009-07-01	0.008	0.74967
2009-08-01	0.008	0.72586
2009-09-01	0.008	0.67442
2009-10-01	0.008	0.77063
2009-11-01	0.008	0.82612
2009-12-01	0.008	0.78375
2010-01-01	0.008	0.86913
2010-02-01	0.008	0.90463
2010-03-01	0.008	0.80114
2010-04-01	0.008	0.86376
2010-05-01	0.008	0.78051
2010-06-01	0.008	0.78651
2010-07-01	0.008	0.77891
2010-08-01	0.008	0.79934
2010-09-01	0.008	0.79425
2010-10-01	0.008	0.82101
2010-11-01	0.008	0.75497
2010-12-01	0.008	0.83653
2011-01-01	0.008	0.84488
2011-02-01	0.008	0.91186
2011-03-01	0.008	0.80266
2011-04-01	0.008	0.82948
2011-05-01	0.008	0.80571
2011-06-01	0.008	0.90879
2011-07-01	0.008	0.90104
2011-08-01	0.008	0.83784
2011-09-01	0.008	0.83592
2011-10-01	0.008	0.81709
2011-11-01	0.008	0.76423
2011-12-01	0.008	0.80017
2012-01-01	0.008	0.7993
2012-02-01	0.008	0.81642
2012-03-01	0.008	0.67635
2012-04-01	0.008	0.66584
2012-05-01	0.008	0.65507
2012-06-01	0.008	0.73436
2012-07-01	0.008	0.75481
2012-08-01	0.008	0.72238
2012-09-01	0.008	0.68478
2012-10-01	0.008	0.74669
2012-11-01	0.008	0.77543
2012-12-01	0.008	0.72614
2013-01-01	0.008	0.69774
2013-02-01	0.008	0.76223
2013-03-01	0.008	0.69847
2013-04-01	0.008	0.82775
2013-05-01	0.008	0.88827
2013-06-01	0.008	0.83463
2013-07-01	0.008	0.80567
2013-08-01	0.008	0.79284
2013-09-01	0.008	0.76188
2013-10-01	0.008	0.76597
2013-11-01	0.008	0.80103
2013-12-01	0.008	0.76006
2014-01-01	0.008	0.82393
2014-02-01	0.008	0.8918
2014-03-01	0.008	0.94548
2014-04-01	0.008	0.91053
2014-05-01	0.008	0.95068
